# Supplementary material for: Analysis of the Citrullus colocynthis Transcriptome during Water Deficit Stress
Source: PLoS One. 2014 Aug 13;9(8):e104657. doi: 10.1371/journal.pone.0104657 (PMC4132101; doi:10.1371/journal.pone.0104657)
Supplement: Table S2 — Non-significant and significantly changed C. colocynthis genes expressed as read counts during drought. (XLSX) [file pone.0104657.s003.xlsx]

## Sheet: Sheet1
corresponding to watermelon ID	T1_count	T1_RPM	T2_count	T2_RPM	T3_count	T3_RPM	T4_count	T4_RPM
Cla021049	1799	42.3	3155	66.6	6814	144.8	14501	263
Cla006886	273	6.4	610	12.9	589	12.5	710	12.9
Cla018669	27	0.6	62	1.3	51	1.1	89	1.6
Cla017000	1083	25.4	1039	21.9	2304	49	6358	115.3
Cla016515	78	1.8	160	3.4	41	0.9	233	4.2
Cla010850	247	5.8	241	5.1	302	6.4	354	6.4
Cla008113	1402	32.9	1212	25.6	1175	25	1477	26.8
Cla005981	0	0	0	0	0	0	0	0
Cla009444	0	0	5	0.1	3	0.1	3	0.1
Cla003088	0	0	0	0	0	0	0	0
Cla011987	0	0	0	0	0	0	1	0
Cla022031	49	1.2	57	1.2	117	2.5	227	4.1
Cla022396	67	1.6	121	2.6	174	3.7	136	2.5
Cla020143	0	0	0	0	0	0	2	0
Cla009403	91	2.1	106	2.2	660	14	4512	81.8
Cla020744	134	3.1	156	3.3	136	2.9	372	6.7
Cla012917	9	0.2	24	0.5	55	1.2	41	0.7
Cla004241	724	17	1087	23	262	5.6	671	12.2
Cla000499	0	0	0	0	0	0	1	0
Cla018554	2796	65.7	2611	55.2	1039	22.1	975	17.7
Cla002198	24	0.6	26	0.5	31	0.7	46	0.8
Cla001997	15	0.4	12	0.3	9	0.2	12	0.2
Cla022317	5	0.1	5	0.1	11	0.2	12	0.2
Cla012455	1	0	2	0	1	0	1	0
Cla019529	192	4.5	233	4.9	319	6.8	581	10.5
Cla018001	43	1	202	4.3	75	1.6	21	0.4
Cla022749	0	0	0	0	0	0	0	0
Cla021450	84	2	81	1.7	74	1.6	181	3.3
Cla016990	25	0.6	24	0.5	5	0.1	30	0.5
Cla005191	835	19.6	548	11.6	806	17.1	1034	18.8
Cla009630	495	11.6	532	11.2	807	17.1	909	16.5
Cla017996	23	0.5	88	1.9	38	0.8	4	0.1
Cla005874	6	0.1	8	0.2	15	0.3	26	0.5
Cla022983	569	13.4	949	20	797	16.9	918	16.7
Cla012589	48	1.1	55	1.2	42	0.9	61	1.1
Cla001259	365	8.6	515	10.9	1780	37.8	1529	27.7
Cla010772	0	0	0	0	0	0	0	0
Cla011097	146	3.4	229	4.8	281	6	189	3.4
Cla014093	142	3.3	214	4.5	103	2.2	179	3.2
Cla014364	299	7	418	8.8	832	17.7	562	10.2
Cla013229	26	0.6	10	0.2	2	0	2	0
Cla009764	84	2	141	3	280	5.9	310	5.6
Cla007130	148	3.5	197	4.2	268	5.7	624	11.3
Cla005205	1	0	0	0	0	0	0	0
Cla006820	16	0.4	34	0.7	4	0.1	0	0
Cla002482	26	0.6	39	0.8	59	1.3	56	1
Cla005475	141	3.3	168	3.5	170	3.6	168	3
Cla016980	33	0.8	36	0.8	7	0.1	0	0
Cla013027	400	9.4	540	11.4	491	10.4	542	9.8
Cla020778	379	8.9	341	7.2	387	8.2	462	8.4
Cla012832	0	0	2	0	0	0	0	0
Cla007537	361	8.5	586	12.4	393	8.4	760	13.8
Cla023287	66	1.6	72	1.5	83	1.8	68	1.2
Cla010092	775	18.2	1380	29.2	1680	35.7	1784	32.4
Cla001045	122	2.9	290	6.1	29	0.6	18	0.3
Cla014912	92	2.2	159	3.4	251	5.3	137	2.5
Cla004050	223	5.2	234	4.9	237	5	305	5.5
Cla020799	1547	36.3	2013	42.5	2392	50.8	1686	30.6
Cla002782	1	0	0	0	0	0	0	0
Cla006962	214	5	493	10.4	216	4.6	123	2.2
Cla006089	0	0	0	0	4	0.1	4	0.1
Cla004739	241	5.7	398	8.4	353	7.5	1499	27.2
Cla002726	296	7	341	7.2	555	11.8	718	13
Cla023385	202	4.7	291	6.1	265	5.6	301	5.5
Cla003197	432	10.1	591	12.5	1056	22.4	1587	28.8
Cla009259	119	2.8	163	3.4	144	3.1	372	6.7
Cla022807	723	17	722	15.3	935	19.9	583	10.6
Cla001599	0	0	0	0	0	0	0	0
Cla008083	254	6	381	8	437	9.3	569	10.3
Cla021009	45	1.1	36	0.8	66	1.4	60	1.1
Cla000803	45	1.1	43	0.9	48	1	29	0.5
Cla017913	262	6.2	415	8.8	902	19.2	1229	22.3
Cla005318	863	20.3	1082	22.9	560	11.9	621	11.3
Cla021822	7	0.2	13	0.3	9	0.2	2	0
Cla006073	33	0.8	40	0.8	22	0.5	40	0.7
Cla020584	1001	23.5	1170	24.7	1266	26.9	1829	33.2
Cla006352	967	22.7	749	15.8	1785	37.9	1388	25.2
Cla006928	70	1.6	108	2.3	64	1.4	51	0.9
Cla012324	177	4.2	247	5.2	158	3.4	144	2.6
Cla005172	2	0	0	0	0	0	0	0
Cla005120	15	0.4	19	0.4	12	0.3	47	0.9
Cla010583	712	16.7	856	18.1	1131	24	2160	39.2
Cla014226	156	3.7	282	6	1546	32.9	1870	33.9
Cla020087	59	1.4	57	1.2	59	1.3	92	1.7
Cla007621	91	2.1	125	2.6	229	4.9	273	5
Cla022780	0	0	0	0	0	0	0	0
Cla016573	176	4.1	246	5.2	314	6.7	375	6.8
Cla001897	314	7.4	458	9.7	1391	29.6	1187	21.5
Cla007017	682	16	912	19.3	912	19.4	1222	22.2
Cla006737	228	5.4	325	6.9	540	11.5	706	12.8
Cla004340	69	1.6	70	1.5	237	5	162	2.9
Cla021459	3	0.1	2	0	9	0.2	8	0.1
Cla005127	94	2.2	118	2.5	14	0.3	88	1.6
Cla004171	0	0	0	0	0	0	0	0
Cla018619	598	14	464	9.8	630	13.4	695	12.6
Cla006430	4588	107.8	5044	106.5	30431	646.6	39598	718.3
Cla006853	1	0	1	0	0	0	3	0.1
Cla018526	661	15.5	731	15.4	201	4.3	1357	24.6
Cla001147	189	4.4	195	4.1	334	7.1	464	8.4
Cla010643	1049	24.6	2487	52.5	5059	107.5	6570	119.2
Cla009567	0	0	3	0.1	0	0	1	0
Cla020163	128	3	119	2.5	257	5.5	334	6.1
Cla005988	534	12.5	915	19.3	1103	23.4	2345	42.5
Cla009311	0	0	0	0	0	0	0	0
Cla010159	505	11.9	769	16.2	1429	30.4	2887	52.4
Cla006294	2	0	0	0	0	0	0	0
Cla020794	325	7.6	347	7.3	480	10.2	874	15.9
Cla004794	213	5	377	8	424	9	207	3.8
Cla017977	39	0.9	43	0.9	50	1.1	63	1.1
Cla004676	159	3.7	137	2.9	145	3.1	184	3.3
Cla006490	202	4.7	373	7.9	517	11	574	10.4
Cla009746	643	15.1	764	16.1	922	19.6	1338	24.3
Cla000580	0	0	0	0	0	0	0	0
Cla022451	80	1.9	116	2.5	113	2.4	166	3
Cla013617	34	0.8	50	1.1	45	1	21	0.4
Cla000626	76	1.8	143	3	129	2.7	115	2.1
Cla013333	486	11.4	374	7.9	147	3.1	33	0.6
Cla013756	51	1.2	92	1.9	215	4.6	561	10.2
Cla008688	87	2	85	1.8	100	2.1	141	2.6
Cla015932	837	19.7	1067	22.5	1463	31.1	1993	36.2
Cla003548	0	0	0	0	0	0	0	0
Cla022016	92	2.2	131	2.8	130	2.8	319	5.8
Cla001919	1	0	0	0	1	0	3	0.1
Cla015193	498	11.7	680	14.4	625	13.3	936	17
Cla001571	26	0.6	28	0.6	71	1.5	56	1
Cla018501	16	0.4	25	0.5	11	0.2	189	3.4
Cla017254	6	0.1	3	0.1	2	0	14	0.3
Cla005311	44	1	89	1.9	78	1.7	67	1.2
Cla000475	0	0	0	0	0	0	0	0
Cla003023	1	0	0	0	0	0	2	0
Cla014560	136	3.2	255	5.4	163	3.5	264	4.8
Cla020090	636	14.9	831	17.6	556	11.8	579	10.5
Cla008641	14	0.3	12	0.3	8	0.2	15	0.3
Cla015661	0	0	0	0	0	0	0	0
Cla020019	87	2	175	3.7	55	1.2	197	3.6
Cla009798	1	0	4	0.1	2	0	2	0
Cla002021	0	0	0	0	1	0	0	0
Cla017782	23	0.5	44	0.9	4	0.1	7	0.1
Cla001477	730	17.1	986	20.8	852	18.1	1351	24.5
Cla020760	0	0	0	0	0	0	5	0.1
Cla013652	338	7.9	666	14.1	313	6.7	1553	28.2
Cla001140	523	12.3	825	17.4	1316	28	1261	22.9
Cla001950	6	0.1	13	0.3	40	0.8	130	2.4
Cla005100	772	18.1	775	16.4	158	3.4	182	3.3
Cla022634	123	2.9	174	3.7	364	7.7	356	6.5
Cla011583	22	0.5	36	0.8	26	0.6	37	0.7
Cla004878	217	5.1	303	6.4	409	8.7	706	12.8
Cla021024	3679	86.4	4290	90.6	7806	165.9	11979	217.3
Cla009024	0	0	0	0	1	0	1	0
Cla022213	71	1.7	86	1.8	91	1.9	153	2.8
Cla017018	181	4.3	267	5.6	217	4.6	182	3.3
Cla014746	450	10.6	688	14.5	829	17.6	1784	32.4
Cla006949	104	2.4	134	2.8	149	3.2	133	2.4
Cla022458	11	0.3	5	0.1	36	0.8	9	0.2
Cla012049	256	6	312	6.6	647	13.7	637	11.6
Cla008546	1128	26.5	1565	33.1	1718	36.5	2883	52.3
Cla001785	599	14.1	995	21	998	21.2	1240	22.5
Cla014246	14	0.3	15	0.3	0	0	4	0.1
Cla020719	336	7.9	578	12.2	113	2.4	75	1.4
Cla006054	3	0.1	0	0	0	0	1	0
Cla018246	13	0.3	21	0.4	16	0.3	27	0.5
Cla021684	45	1.1	59	1.2	81	1.7	95	1.7
Cla011552	13716	322.2	11282	238.3	3810	81	2827	51.3
Cla016685	174	4.1	362	7.6	129	2.7	81	1.5
Cla007614	569	13.4	429	9.1	1221	25.9	1614	29.3
Cla011973	0	0	0	0	0	0	0	0
Cla012023	650	15.3	847	17.9	1280	27.2	2525	45.8
Cla023020	10	0.2	9	0.2	6	0.1	12	0.2
Cla022868	204	4.8	284	6	243	5.2	559	10.1
Cla007029	7	0.2	34	0.7	5	0.1	29	0.5
Cla017437	624	14.7	1545	32.6	16516	350.9	11571	209.9
Cla011370	3	0.1	7	0.1	2	0	8	0.1
Cla016401	4	0.1	15	0.3	2126	45.2	187	3.4
Cla016619	51	1.2	43	0.9	7	0.1	6	0.1
Cla018478	0	0	2	0	3	0.1	0	0
Cla008476	16	0.4	18	0.4	6	0.1	18	0.3
Cla022722	290	6.8	315	6.7	486	10.3	524	9.5
Cla004373	2	0	0	0	1	0	3	0.1
Cla010207	325	7.6	446	9.4	424	9	427	7.7
Cla016087	179	4.2	273	5.8	101	2.1	70	1.3
Cla018325	0	0	0	0	0	0	0	0
Cla010038	144	3.4	177	3.7	101	2.1	249	4.5
Cla000591	0	0	3	0.1	0	0	0	0
Cla018049	545	12.8	600	12.7	738	15.7	562	10.2
Cla001105	0	0	0	0	0	0	0	0
Cla001133	0	0	0	0	0	0	5	0.1
Cla012225	1280	30.1	1378	29.1	1089	23.1	589	10.7
Cla016473	0	0	0	0	0	0	0	0
Cla001169	207	4.9	264	5.6	466	9.9	501	9.1
Cla018699	331	7.8	523	11	708	15	1207	21.9
Cla019503	76	1.8	100	2.1	90	1.9	149	2.7
Cla001887	21	0.5	28	0.6	15	0.3	7	0.1
Cla000966	0	0	0	0	0	0	0	0
Cla010252	6	0.1	13	0.3	16	0.3	18	0.3
Cla003736	3	0.1	0	0	2	0	0	0
Cla021121	24	0.6	81	1.7	2431	51.7	5732	104
Cla011787	257	6	397	8.4	809	17.2	1595	28.9
Cla008914	765	18	1039	21.9	108	2.3	50	0.9
Cla020205	29	0.7	26	0.5	66	1.4	61	1.1
Cla003201	0	0	0	0	0	0	0	0
Cla005875	705	16.6	861	18.2	877	18.6	1718	31.2
Cla021083	20	0.5	28	0.6	11	0.2	26	0.5
Cla020948	225	5.3	210	4.4	226	4.8	433	7.9
Cla012836	175	4.1	248	5.2	447	9.5	446	8.1
Cla012284	998	23.4	1295	27.4	1305	27.7	2284	41.4
Cla017804	172	4	221	4.7	258	5.5	511	9.3
Cla007631	526	12.4	656	13.9	1003	21.3	1320	23.9
Cla002497	484	11.4	573	12.1	768	16.3	5275	95.7
Cla011118	145	3.4	265	5.6	1079	22.9	1803	32.7
Cla020195	1743	40.9	2120	44.8	1574	33.4	2656	48.2
Cla009585	0	0	1	0	1	0	0	0
Cla000575	124	2.9	199	4.2	249	5.3	240	4.4
Cla013246	0	0	1	0	0	0	3	0.1
Cla010084	109	2.6	244	5.2	101	2.1	120	2.2
Cla010145	448	10.5	579	12.2	1369	29.1	1439	26.1
Cla022649	21	0.5	33	0.7	7	0.1	9	0.2
Cla021408	1254	29.5	1874	39.6	1339	28.5	1237	22.4
Cla011485	0	0	0	0	0	0	1	0
Cla001861	557	13.1	555	11.7	477	10.1	1092	19.8
Cla021414	902	21.2	1323	27.9	1135	24.1	1569	28.5
Cla009639	48	1.1	245	5.2	28	0.6	42	0.8
Cla003833	0	0	0	0	0	0	0	0
Cla019904	37	0.9	44	0.9	16	0.3	5	0.1
Cla006497	5	0.1	9	0.2	6	0.1	4	0.1
Cla004649	10	0.2	15	0.3	5	0.1	110	2
Cla000914	938	22	1373	29	694	14.7	1863	33.8
Cla016640	181	4.3	72	1.5	18	0.4	21	0.4
Cla000613	0	0	0	0	0	0	0	0
Cla010533	0	0	1	0	1	0	2	0
Cla012547	1	0	4	0.1	5	0.1	7	0.1
Cla010785	449	10.5	552	11.7	633	13.5	337	6.1
Cla022936	121	2.8	140	3	122	2.6	118	2.1
Cla010498	3	0.1	5	0.1	17	0.4	3	0.1
Cla014739	0	0	0	0	0	0	0	0
Cla021212	401	9.4	616	13	1231	26.2	1173	21.3
Cla010432	48	1.1	58	1.2	20	0.4	45	0.8
Cla006010	345	8.1	727	15.4	648	13.8	1385	25.1
Cla019891	916	21.5	1033	21.8	708	15	582	10.6
Cla003784	469	11	488	10.3	675	14.3	801	14.5
Cla011742	833	19.6	1735	36.6	1806	38.4	2875	52.2
Cla017467	229	5.4	243	5.1	258	5.5	407	7.4
Cla017328	805	18.9	864	18.3	1406	29.9	3952	71.7
Cla021614	19	0.4	8	0.2	18	0.4	53	1
Cla004687	1544	36.3	2125	44.9	1893	40.2	2381	43.2
Cla020935	31	0.7	102	2.2	62	1.3	39	0.7
Cla017862	7	0.2	11	0.2	0	0	2	0
Cla009179	60	1.4	51	1.1	110	2.3	142	2.6
Cla009464	9	0.2	5	0.1	2	0	10	0.2
Cla003485	0	0	0	0	0	0	0	0
Cla003963	0	0	0	0	0	0	0	0
Cla001026	80	1.9	90	1.9	136	2.9	134	2.4
Cla018302	33	0.8	39	0.8	42	0.9	201	3.6
Cla015803	277	6.5	512	10.8	917	19.5	1436	26
Cla017895	23	0.5	14	0.3	0	0	11	0.2
Cla016042	764	17.9	1133	23.9	1244	26.4	722	13.1
Cla006479	127	3	122	2.6	36	0.8	85	1.5
Cla007395	943	22.1	988	20.9	827	17.6	1443	26.2
Cla019829	875	20.6	1230	26	2482	52.7	6569	119.2
Cla006990	0	0	0	0	3	0.1	16	0.3
Cla003688	3	0.1	5	0.1	3	0.1	0	0
Cla017559	108	2.5	88	1.9	83	1.8	193	3.5
Cla004028	8	0.2	28	0.6	48	1	40	0.7
Cla013610	74	1.7	73	1.5	98	2.1	88	1.6
Cla007882	3	0.1	9	0.2	2	0	16	0.3
Cla021411	155	3.6	228	4.8	315	6.7	297	5.4
Cla021043	0	0	3	0.1	0	0	0	0
Cla004614	67	1.6	193	4.1	96	2	47	0.9
Cla022655	0	0	11	0.2	10	0.2	10	0.2
Cla009910	235	5.5	101	2.1	87	1.8	129	2.3
Cla010425	2	0	4	0.1	0	0	1	0
Cla016324	60	1.4	154	3.3	100	2.1	167	3
Cla009487	5	0.1	16	0.3	8	0.2	9	0.2
Cla018040	10	0.2	11	0.2	11	0.2	14	0.3
Cla007961	568	13.3	766	16.2	1184	25.2	1173	21.3
Cla005615	706	16.6	1097	23.2	1358	28.9	901	16.3
Cla014649	3	0.1	4	0.1	0	0	1	0
Cla014727	126	3	135	2.9	263	5.6	228	4.1
Cla005564	245	5.8	258	5.4	313	6.7	306	5.6
Cla000847	0	0	0	0	0	0	0	0
Cla010211	605	14.2	794	16.8	1003	21.3	1393	25.3
Cla007682	2	0	0	0	0	0	7	0.1
Cla008779	795	18.7	942	19.9	991	21.1	1882	34.1
Cla013987	877	20.6	1454	30.7	1695	36	3957	71.8
Cla010720	84	2	238	5	60	1.3	340	6.2
Cla018047	11	0.3	7	0.1	34	0.7	4	0.1
Cla019109	13464	316.2	18787	396.8	8674	184.3	3317	60.2
Cla016722	101	2.4	105	2.2	212	4.5	271	4.9
Cla013590	0	0	0	0	0	0	0	0
Cla015405	0	0	0	0	3	0.1	6	0.1
Cla001179	29	0.7	33	0.7	12	0.3	28	0.5
Cla005891	61	1.4	12	0.3	8	0.2	7	0.1
Cla001294	5	0.1	11	0.2	8	0.2	7	0.1
Cla010710	0	0	0	0	0	0	0	0
Cla003447	5	0.1	10	0.2	5	0.1	16	0.3
Cla015452	1695	39.8	1561	33	1080	22.9	1131	20.5
Cla007254	96	2.3	27	0.6	24	0.5	19	0.3
Cla012265	195	4.6	234	4.9	132	2.8	150	2.7
Cla022321	0	0	0	0	2	0	3	0.1
Cla008262	94	2.2	107	2.3	192	4.1	193	3.5
Cla006235	2	0	7	0.1	8	0.2	4	0.1
Cla003442	67	1.6	85	1.8	55	1.2	93	1.7
Cla021433	1	0	11	0.2	8	0.2	6	0.1
Cla023424	411	9.7	639	13.5	1321	28.1	1418	25.7
Cla011916	3	0.1	2	0	3	0.1	1	0
Cla017130	194	4.6	197	4.2	446	9.5	499	9.1
Cla011397	0	0	1	0	0	0	0	0
Cla010529	0	0	0	0	1	0	0	0
Cla003350	0	0	0	0	0	0	0	0
Cla015950	357	8.4	1259	26.6	1350	28.7	7723	140.1
Cla018610	32	0.8	96	2	709	15.1	1183	21.5
Cla008157	509	12	662	14	61	1.3	81	1.5
Cla014213	19	0.4	17	0.4	0	0	0	0
Cla009682	27	0.6	71	1.5	12	0.3	3	0.1
Cla002043	0	0	0	0	0	0	0	0
Cla012028	31	0.7	21	0.4	17	0.4	58	1.1
Cla020477	646	15.2	1099	23.2	1262	26.8	1284	23.3
Cla006938	204	4.8	255	5.4	403	8.6	568	10.3
Cla004839	143	3.4	208	4.4	375	8	308	5.6
Cla005633	17	0.4	19	0.4	27	0.6	18	0.3
Cla019341	87	2	99	2.1	102	2.2	108	2
Cla016538	253	5.9	398	8.4	213	4.5	494	9
Cla019321	2577	60.5	3967	83.8	6223	132.2	8973	162.8
Cla016498	93	2.2	129	2.7	285	6.1	228	4.1
Cla012909	0	0	1	0	0	0	0	0
Cla021112	68	1.6	56	1.2	237	5	116	2.1
Cla018173	0	0	0	0	0	0	0	0
Cla015916	0	0	0	0	0	0	0	0
Cla007729	213	5	321	6.8	270	5.7	745	13.5
Cla010380	3377	79.3	5102	107.8	6083	129.3	6380	115.7
Cla000138	0	0	0	0	0	0	0	0
Cla001246	3	0.1	4	0.1	2	0	12	0.2
Cla008398	922	21.7	1024	21.6	536	11.4	548	9.9
Cla019282	745	17.5	857	18.1	578	12.3	174	3.2
Cla021659	24	0.6	30	0.6	20	0.4	105	1.9
Cla014327	2818	66.2	2030	42.9	3599	76.5	1858	33.7
Cla016914	2	0	0	0	0	0	0	0
Cla020696	611	14.4	719	15.2	377	8	275	5
Cla004809	0	0	0	0	0	0	0	0
Cla016907	4	0.1	0	0	1	0	2	0
Cla018498	235	5.5	273	5.8	257	5.5	631	11.4
Cla016537	185	4.3	123	2.6	140	3	129	2.3
Cla000657	0	0	0	0	0	0	0	0
Cla009913	33	0.8	50	1.1	52	1.1	74	1.3
Cla021302	3	0.1	0	0	1	0	1	0
Cla019290	65	1.5	205	4.3	306	6.5	402	7.3
Cla001159	709	16.7	946	20	808	17.2	1086	19.7
Cla020224	0	0	1	0	2	0	1	0
Cla021676	105	2.5	177	3.7	30	0.6	15	0.3
Cla015349	26233	616.2	44245	934.6	9924	210.9	3425	62.1
Cla021304	112	2.6	185	3.9	339	7.2	439	8
Cla018330	769	18.1	867	18.3	1012	21.5	1723	31.3
Cla019989	0	0	0	0	0	0	0	0
Cla019581	6	0.1	0	0	34	0.7	101	1.8
Cla003115	0	0	0	0	0	0	0	0
Cla008409	259	6.1	281	5.9	447	9.5	433	7.9
Cla006130	0	0	0	0	0	0	0	0
Cla002170	36	0.8	60	1.3	40	0.8	154	2.8
Cla019950	1489	35	1868	39.5	3412	72.5	4962	90
Cla010576	7	0.2	24	0.5	10	0.2	25	0.5
Cla016018	48	1.1	90	1.9	243	5.2	133	2.4
Cla007792	6514	153	6305	133.2	4801	102	6608	119.9
Cla009367	1644	38.6	2179	46	1645	35	2073	37.6
Cla005954	574	13.5	712	15	1020	21.7	1974	35.8
Cla019001	39	0.9	17	0.4	0	0	4	0.1
Cla009356	2407	56.5	3157	66.7	4683	99.5	9816	178.1
Cla020121	2372	55.7	2701	57.1	1739	37	2236	40.6
Cla002565	0	0	0	0	0	0	0	0
Cla002534	3	0.1	6	0.1	4	0.1	1	0
Cla011596	102	2.4	230	4.9	338	7.2	220	4
Cla010291	51	1.2	97	2	62	1.3	121	2.2
Cla011572	0	0	1	0	0	0	0	0
Cla021878	87	2	137	2.9	290	6.2	229	4.2
Cla012540	334	7.8	476	10.1	44	0.9	70	1.3
Cla019235	14486	340.3	16187	341.9	9984	212.1	7034	127.6
Cla009386	224	5.3	325	6.9	1729	36.7	4043	73.3
Cla010401	41	1	111	2.3	77	1.6	187	3.4
Cla013122	124	2.9	81	1.7	75	1.6	169	3.1
Cla022057	20	0.5	27	0.6	20	0.4	30	0.5
Cla021343	269	6.3	249	5.3	20	0.4	18	0.3
Cla008786	97	2.3	135	2.9	184	3.9	319	5.8
Cla001986	42	1	49	1	80	1.7	75	1.4
Cla015278	1994	46.8	3733	78.9	3079	65.4	4252	77.1
Cla017418	299	7	378	8	362	7.7	295	5.4
Cla012194	2005	47.1	2696	56.9	5501	116.9	5201	94.3
Cla009297	11	0.3	19	0.4	10	0.2	27	0.5
Cla020310	265	6.2	315	6.7	318	6.8	340	6.2
Cla017682	578	13.6	495	10.5	655	13.9	568	10.3
Cla006455	662	15.5	874	18.5	1370	29.1	1472	26.7
Cla009107	17	0.4	34	0.7	42	0.9	51	0.9
Cla011711	3	0.1	4	0.1	7	0.1	1	0
Cla019440	3	0.1	9	0.2	10	0.2	33	0.6
Cla007266	33	0.8	48	1	69	1.5	72	1.3
Cla003827	23	0.5	19	0.4	11	0.2	44	0.8
Cla012050	281	6.6	404	8.5	560	11.9	784	14.2
Cla017542	73	1.7	87	1.8	134	2.8	161	2.9
Cla021825	292	6.9	286	6	235	5	321	5.8
Cla015720	29	0.7	34	0.7	13	0.3	23	0.4
Cla016933	109	2.6	77	1.6	196	4.2	219	4
Cla006074	104	2.4	143	3	162	3.4	174	3.2
Cla016352	229	5.4	328	6.9	362	7.7	583	10.6
Cla001944	206	4.8	400	8.4	294	6.2	191	3.5
Cla020364	38	0.9	30	0.6	17	0.4	25	0.5
Cla017125	440	10.3	519	11	480	10.2	491	8.9
Cla023467	101	2.4	74	1.6	125	2.7	279	5.1
Cla010181	40	0.9	44	0.9	49	1	52	0.9
Cla002950	173	4.1	335	7.1	346	7.4	250	4.5
Cla002395	6	0.1	4	0.1	8	0.2	9	0.2
Cla003327	409	9.6	621	13.1	862	18.3	760	13.8
Cla011476	5	0.1	20	0.4	0	0	10	0.2
Cla004300	257	6	369	7.8	53	1.1	222	4
Cla016468	2391	56.2	2610	55.1	1203	25.6	1314	23.8
Cla009819	1370	32.2	1837	38.8	2115	44.9	3660	66.4
Cla004386	231	5.4	362	7.6	252	5.4	338	6.1
Cla014554	4	0.1	9	0.2	6	0.1	5	0.1
Cla003348	0	0	1	0	0	0	1	0
Cla004313	0	0	0	0	0	0	0	0
Cla009410	396	9.3	531	11.2	510	10.8	683	12.4
Cla018103	845	19.8	1164	24.6	1291	27.4	1872	34
Cla003668	441	10.4	578	12.2	614	13	927	16.8
Cla012881	435	10.2	522	11	769	16.3	412	7.5
Cla009482	547	12.8	750	15.8	175	3.7	311	5.6
Cla001729	4	0.1	13	0.3	14	0.3	21	0.4
Cla017640	0	0	0	0	0	0	4	0.1
Cla004341	615	14.4	563	11.9	1272	27	694	12.6
Cla021629	161	3.8	213	4.5	289	6.1	443	8
Cla002527	506	11.9	611	12.9	565	12	774	14
Cla021706	0	0	1	0	20	0.4	656	11.9
Cla015190	5236	123	8538	180.4	2658	56.5	5250	95.2
Cla016949	16	0.4	56	1.2	80	1.7	239	4.3
Cla018216	28	0.7	26	0.5	52	1.1	32	0.6
Cla007894	0	0	0	0	0	0	0	0
Cla014938	54	1.3	31	0.7	40	0.8	51	0.9
Cla015325	33	0.8	20	0.4	63	1.3	120	2.2
Cla002294	0	0	0	0	0	0	0	0
Cla020568	0	0	0	0	2	0	0	0
Cla017165	288	6.8	391	8.3	612	13	1177	21.4
Cla014113	491	11.5	635	13.4	496	10.5	9644	174.9
Cla013730	303	7.1	440	9.3	177	3.8	436	7.9
Cla010417	723	17	1120	23.7	3337	70.9	4947	89.7
Cla012380	2	0	0	0	2	0	0	0
Cla016942	1225	28.8	1541	32.6	2187	46.5	2339	42.4
Cla013140	0	0	9	0.2	7	0.1	1	0
Cla014605	0	0	2	0	0	0	0	0
Cla010748	25	0.6	42	0.9	41	0.9	56	1
Cla002800	1336	31.4	1282	27.1	569	12.1	218	4
Cla015283	694	16.3	484	10.2	650	13.8	844	15.3
Cla021127	123	2.9	127	2.7	102	2.2	45	0.8
Cla003004	1	0	4	0.1	3	0.1	7	0.1
Cla005904	0	0	0	0	1	0	0	0
Cla021805	101	2.4	65	1.4	210	4.5	231	4.2
Cla019222	318	7.5	289	6.1	419	8.9	622	11.3
Cla020506	664	15.6	1516	32	406	8.6	132	2.4
Cla017543	13	0.3	2	0	0	0	0	0
Cla016094	181	4.3	299	6.3	381	8.1	529	9.6
Cla007145	66	1.6	87	1.8	103	2.2	93	1.7
Cla004121	0	0	0	0	0	0	0	0
Cla002651	1	0	0	0	0	0	0	0
Cla018285	9032	212.1	13452	284.2	865	18.4	540	9.8
Cla004152	1	0	1	0	0	0	3	0.1
Cla018309	147	3.5	173	3.7	163	3.5	328	5.9
Cla021492	756	17.8	1019	21.5	2091	44.4	487	8.8
Cla021145	207	4.9	410	8.7	511	10.9	595	10.8
Cla004584	361	8.5	421	8.9	754	16	1382	25.1
Cla010659	0	0	0	0	0	0	0	0
Cla011909	28	0.7	41	0.9	91	1.9	128	2.3
Cla016874	0	0	0	0	0	0	1	0
Cla009857	476	11.2	655	13.8	364	7.7	1060	19.2
Cla016554	551	12.9	690	14.6	243	5.2	1218	22.1
Cla016294	0	0	2	0	106	2.3	17	0.3
Cla017870	145	3.4	218	4.6	229	4.9	170	3.1
Cla004214	141	3.3	196	4.1	474	10.1	409	7.4
Cla000271	0	0	0	0	0	0	3	0.1
Cla015649	1	0	0	0	0	0	0	0
Cla011460	652	15.3	739	15.6	1302	27.7	1952	35.4
Cla005050	550	12.9	846	17.9	1439	30.6	2854	51.8
Cla020181	25	0.6	34	0.7	40	0.8	55	1
Cla007487	68	1.6	66	1.4	86	1.8	113	2
Cla001808	73	1.7	34	0.7	44	0.9	58	1.1
Cla009199	0	0	0	0	0	0	0	0
Cla005309	94	2.2	153	3.2	144	3.1	208	3.8
Cla001189	79	1.9	98	2.1	149	3.2	1862	33.8
Cla000530	0	0	0	0	0	0	0	0
Cla011243	322	7.6	233	4.9	569	12.1	784	14.2
Cla016106	0	0	1	0	0	0	4	0.1
Cla022718	175	4.1	161	3.4	170	3.6	498	9
Cla006683	590	13.9	792	16.7	820	17.4	1131	20.5
Cla015395	66	1.6	85	1.8	107	2.3	209	3.8
Cla004636	135	3.2	167	3.5	256	5.4	308	5.6
Cla010276	6	0.1	3	0.1	1	0	19	0.3
Cla001038	98	2.3	174	3.7	82	1.7	120	2.2
Cla011616	586	13.8	409	8.6	837	17.8	1099	19.9
Cla020723	5	0.1	10	0.2	3	0.1	3	0.1
Cla016634	36	0.8	19	0.4	2	0	4	0.1
Cla004133	0	0	0	0	0	0	0	0
Cla001278	3	0.1	2	0	3	0.1	2	0
Cla018263	788	18.5	1145	24.2	1291	27.4	1281	23.2
Cla004959	3	0.1	0	0	1	0	2	0
Cla013138	43	1	44	0.9	69	1.5	55	1
Cla004832	268	6.3	459	9.7	265	5.6	195	3.5
Cla018238	24	0.6	13	0.3	20	0.4	15	0.3
Cla006706	222	5.2	326	6.9	424	9	539	9.8
Cla012174	268	6.3	318	6.7	666	14.2	791	14.3
Cla022596	22	0.5	8	0.2	40	0.8	65	1.2
Cla012659	168	3.9	179	3.8	313	6.7	718	13
Cla010943	29	0.7	61	1.3	84	1.8	78	1.4
Cla002300	55	1.3	78	1.6	107	2.3	156	2.8
Cla004540	0	0	0	0	0	0	0	0
Cla012175	4403	103.4	3876	81.9	4385	93.2	6650	120.6
Cla019874	166	3.9	191	4	516	11	1033	18.7
Cla010875	8	0.2	17	0.4	1522	32.3	361	6.5
Cla005442	749	17.6	1219	25.7	1784	37.9	8704	157.9
Cla020264	23	0.5	10	0.2	5	0.1	13	0.2
Cla017653	1	0	5	0.1	2	0	1	0
Cla013714	11	0.3	29	0.6	33	0.7	54	1
Cla015119	408	9.6	469	9.9	235	5	281	5.1
Cla015019	114	2.7	226	4.8	439	9.3	481	8.7
Cla018547	305	7.2	429	9.1	105	2.2	353	6.4
Cla008387	248	5.8	426	9	444	9.4	799	14.5
Cla017848	86	2	89	1.9	8	0.2	9	0.2
Cla017950	3534	83	3903	82.4	987	21	1478	26.8
Cla007878	0	0	0	0	0	0	0	0
Cla009529	75	1.8	72	1.5	38	0.8	50	0.9
Cla005592	455	10.7	444	9.4	481	10.2	889	16.1
Cla012098	115	2.7	94	2	28	0.6	34	0.6
Cla020063	120	2.8	137	2.9	187	4	191	3.5
Cla011640	0	0	1	0	0	0	0	0
Cla000011	0	0	0	0	0	0	0	0
Cla023178	6	0.1	4	0.1	2	0	45	0.8
Cla005384	988	23.2	124	2.6	666	14.2	3429	62.2
Cla015563	64	1.5	87	1.8	77	1.6	76	1.4
Cla022676	239	5.6	411	8.7	530	11.3	660	12
Cla004501	0	0	0	0	0	0	0	0
Cla003099	10	0.2	29	0.6	14	0.3	8	0.1
Cla015261	164	3.9	208	4.4	267	5.7	291	5.3
Cla009431	84	2	93	2	90	1.9	110	2
Cla023316	0	0	0	0	3	0.1	1	0
Cla020656	286	6.7	395	8.3	778	16.5	1062	19.3
Cla009810	116	2.7	151	3.2	222	4.7	423	7.7
Cla019301	2	0	5	0.1	3	0.1	34	0.6
Cla008324	29	0.7	86	1.8	191	4.1	1374	24.9
Cla019637	148	3.5	146	3.1	135	2.9	213	3.9
Cla020887	81	1.9	58	1.2	102	2.2	115	2.1
Cla022930	268	6.3	454	9.6	622	13.2	921	16.7
Cla008828	48	1.1	90	1.9	167	3.5	170	3.1
Cla010761	26	0.6	49	1	2	0	10	0.2
Cla022960	600	14.1	789	16.7	1350	28.7	1269	23
Cla018878	97	2.3	114	2.4	124	2.6	173	3.1
Cla017526	51	1.2	76	1.6	64	1.4	58	1.1
Cla000096	2	0	9	0.2	0	0	0	0
Cla012269	187	4.4	254	5.4	478	10.2	438	7.9
Cla021062	89	2.1	144	3	134	2.8	219	4
Cla009870	43	1	83	1.8	23	0.5	40	0.7
Cla000433	22	0.5	16	0.3	14	0.3	27	0.5
Cla020861	243	5.7	261	5.5	228	4.8	3174	57.6
Cla003648	309	7.3	418	8.8	236	5	478	8.7
Cla019168	594	14	765	16.2	2897	61.6	3023	54.8
Cla022132	68	1.6	95	2	156	3.3	126	2.3
Cla006389	0	0	0	0	0	0	0	0
Cla001553	0	0	0	0	0	0	1	0
Cla015971	140	3.3	151	3.2	171	3.6	398	7.2
Cla012245	1204	28.3	1779	37.6	3590	76.3	7019	127.3
Cla020868	225	5.3	378	8	552	11.7	1325	24
Cla016449	65	1.5	133	2.8	70	1.5	95	1.7
Cla005416	162	3.8	163	3.4	133	2.8	174	3.2
Cla002745	0	0	0	0	0	0	0	0
Cla015114	603	14.2	780	16.5	618	13.1	1344	24.4
Cla005330	3	0.1	2	0	0	0	0	0
Cla013443	1847	43.4	1938	40.9	1853	39.4	1154	20.9
Cla016310	31	0.7	32	0.7	65	1.4	37	0.7
Cla009211	719	16.9	1156	24.4	1188	25.2	1395	25.3
Cla016501	38	0.9	180	3.8	30	0.6	14	0.3
Cla011177	403	9.5	344	7.3	481	10.2	2837	51.5
Cla003683	144	3.4	177	3.7	560	11.9	489	8.9
Cla005107	0	0	0	0	2	0	0	0
Cla004892	35	0.8	57	1.2	99	2.1	23	0.4
Cla001114	0	0	0	0	0	0	0	0
Cla008626	0	0	0	0	0	0	0	0
Cla010347	253	5.9	302	6.4	1675	35.6	1852	33.6
Cla012752	27	0.6	43	0.9	6	0.1	0	0
Cla006175	39	0.9	147	3.1	356	7.6	1831	33.2
Cla005081	193	4.5	245	5.2	445	9.5	193	3.5
Cla005765	892	21	1610	34	2434	51.7	5202	94.4
Cla010740	112	2.6	194	4.1	81	1.7	250	4.5
Cla001712	1093	25.7	1375	29	2357	50.1	5206	94.4
Cla001126	92	2.2	112	2.4	131	2.8	206	3.7
Cla011732	64	1.5	129	2.7	125	2.7	141	2.6
Cla021561	974	22.9	1674	35.4	866	18.4	724	13.1
Cla000812	2	0	0	0	1	0	2	0
Cla003224	0	0	0	0	0	0	0	0
Cla005401	18	0.4	43	0.9	31	0.7	74	1.3
Cla004289	696	16.3	1017	21.5	1306	27.8	1985	36
Cla008893	1493	35.1	2039	43.1	3248	69	4529	82.2
Cla018755	2282	53.6	2465	52.1	930	19.8	803	14.6
Cla015376	107	2.5	205	4.3	194	4.1	580	10.5
Cla008789	485	11.4	498	10.5	228	4.8	127	2.3
Cla017819	19	0.4	25	0.5	240	5.1	567	10.3
Cla018540	164	3.9	268	5.7	277	5.9	281	5.1
Cla020438	110	2.6	185	3.9	1156	24.6	915	16.6
Cla005408	1290	30.3	3086	65.2	24244	515.2	61152	1109.3
Cla003981	5	0.1	7	0.1	1	0	6	0.1
Cla018680	793	18.6	1537	32.5	1512	32.1	4181	75.8
Cla022979	231	5.4	413	8.7	425	9	903	16.4
Cla014708	1	0	2	0	0	0	6	0.1
Cla001662	205	4.8	213	4.5	411	8.7	470	8.5
Cla019718	1	0	0	0	0	0	0	0
Cla021733	0	0	0	0	0	0	19	0.3
Cla021223	25	0.6	31	0.7	13	0.3	8	0.1
Cla010752	224	5.3	325	6.9	337	7.2	535	9.7
Cla015725	800	18.8	865	18.3	1354	28.8	1901	34.5
Cla002656	101	2.4	111	2.3	192	4.1	236	4.3
Cla015049	8	0.2	15	0.3	8	0.2	12	0.2
Cla012766	28	0.7	52	1.1	21	0.4	285	5.2
Cla016219	16	0.4	37	0.8	354	7.5	278	5
Cla002957	13	0.3	67	1.4	61	1.3	342	6.2
Cla003134	472	11.1	632	13.3	993	21.1	1084	19.7
Cla008846	59	1.4	88	1.9	70	1.5	104	1.9
Cla019930	0	0	0	0	0	0	0	0
Cla002379	151	3.5	190	4	371	7.9	401	7.3
Cla005153	645	15.1	987	20.8	1258	26.7	1608	29.2
Cla005096	741	17.4	967	20.4	1239	26.3	1476	26.8
Cla006349	581	13.6	545	11.5	793	16.9	1107	20.1
Cla005869	51	1.2	71	1.5	67	1.4	44	0.8
Cla008819	605	14.2	438	9.3	901	19.1	353	6.4
Cla000127	0	0	0	0	0	0	0	0
Cla018455	248	5.8	229	4.8	59	1.3	54	1
Cla008415	2552	59.9	3863	81.6	984	20.9	2244	40.7
Cla005507	0	0	17	0.4	241	5.1	371	6.7
Cla001433	0	0	0	0	0	0	0	0
Cla011261	0	0	0	0	0	0	0	0
Cla017938	571	13.4	592	12.5	706	15	1606	29.1
Cla015234	63	1.5	178	3.8	110	2.3	122	2.2
Cla022589	1601	37.6	2385	50.4	1852	39.4	2952	53.5
Cla011519	0	0	0	0	0	0	0	0
Cla003254	1284	30.2	1399	29.6	1017	21.6	856	15.5
Cla002438	139	3.3	176	3.7	49	1	120	2.2
Cla003746	18	0.4	23	0.5	13	0.3	19	0.3
Cla006093	171	4	245	5.2	334	7.1	410	7.4
Cla016214	0	0	0	0	0	0	0	0
Cla017395	152	3.6	224	4.7	263	5.6	443	8
Cla003299	351	8.2	358	7.6	320	6.8	493	8.9
Cla004221	155	3.6	241	5.1	40	0.8	31	0.6
Cla001064	98	2.3	109	2.3	67	1.4	144	2.6
Cla004114	0	0	0	0	1	0	4	0.1
Cla014919	2848	66.9	2266	47.9	4310	91.6	3059	55.5
Cla004309	295	6.9	311	6.6	346	7.4	2548	46.2
Cla003005	466	10.9	920	19.4	1090	23.2	1739	31.5
Cla005687	428	10.1	430	9.1	456	9.7	731	13.3
Cla015138	16	0.4	6	0.1	29	0.6	10	0.2
Cla023171	648	15.2	920	19.4	1079	22.9	1335	24.2
Cla006318	158	3.7	203	4.3	239	5.1	316	5.7
Cla022291	191	4.5	248	5.2	325	6.9	1118	20.3
Cla009826	438	10.3	682	14.4	534	11.3	260	4.7
Cla021541	224	5.3	283	6	329	7	428	7.8
Cla003130	0	0	2	0	0	0	0	0
Cla021987	139	3.3	239	5	107	2.3	210	3.8
Cla016805	392	9.2	334	7.1	27	0.6	40	0.7
Cla019999	50	1.2	81	1.7	7	0.1	5	0.1
Cla010473	110	2.6	131	2.8	80	1.7	58	1.1
Cla002370	175	4.1	242	5.1	410	8.7	675	12.2
Cla021680	826	19.4	890	18.8	737	15.7	950	17.2
Cla019617	296	7	371	7.8	371	7.9	383	6.9
Cla010975	825	19.4	600	12.7	753	16	425	7.7
Cla016771	77	1.8	125	2.6	90	1.9	78	1.4
Cla020305	1	0	10	0.2	6	0.1	5	0.1
Cla002990	1	0	3	0.1	1	0	0	0
Cla008825	654	15.4	892	18.8	1083	23	1557	28.2
Cla023335	126	3	31	0.7	261	5.5	385	7
Cla022237	192	4.5	280	5.9	272	5.8	172	3.1
Cla011330	0	0	11	0.2	6	0.1	12	0.2
Cla000776	1	0	0	0	0	0	0	0
Cla012840	63	1.5	107	2.3	54	1.1	46	0.8
Cla010450	338	7.9	425	9	578	12.3	721	13.1
Cla018428	7	0.2	24	0.5	20	0.4	44	0.8
Cla019612	292	6.9	434	9.2	447	9.5	554	10
Cla006208	429	10.1	691	14.6	318	6.8	553	10
Cla008678	4	0.1	2	0	2	0	7	0.1
Cla011956	0	0	0	0	0	0	0	0
Cla001362	297	7	421	8.9	577	12.3	685	12.4
Cla009133	0	0	0	0	1	0	1	0
Cla023195	137	3.2	216	4.6	293	6.2	470	8.5
Cla010064	2	0	15	0.3	4	0.1	2	0
Cla005240	200	4.7	290	6.1	202	4.3	274	5
Cla012674	543	12.8	437	9.2	974	20.7	798	14.5
Cla006844	33	0.8	29	0.6	43	0.9	40	0.7
Cla018999	171	4	270	5.7	176	3.7	311	5.6
Cla011421	14	0.3	29	0.6	377	8	195	3.5
Cla015744	1441	33.8	2121	44.8	1738	36.9	2990	54.2
Cla002431	234	5.5	355	7.5	435	9.2	282	5.1
Cla012877	43	1	136	2.9	486	10.3	1467	26.6
Cla017482	131	3.1	132	2.8	196	4.2	239	4.3
Cla009155	123	2.9	225	4.8	284	6	321	5.8
Cla016072	48	1.1	25	0.5	33	0.7	29	0.5
Cla003602	533	12.5	644	13.6	463	9.8	674	12.2
Cla010948	185	4.3	268	5.7	175	3.7	162	2.9
Cla023280	22	0.5	15	0.3	6	0.1	13	0.2
Cla015291	19	0.4	22	0.5	24	0.5	55	1
Cla003765	0	0	0	0	0	0	0	0
Cla019097	112	2.6	213	4.5	160	3.4	262	4.8
Cla007215	125	2.9	127	2.7	250	5.3	244	4.4
Cla019670	0	0	0	0	0	0	0	0
Cla019007	0	0	0	0	8	0.2	143	2.6
Cla005325	47	1.1	69	1.5	11	0.2	0	0
Cla019630	1	0	4	0.1	0	0	3	0.1
Cla013295	285	6.7	407	8.6	476	10.1	539	9.8
Cla018274	649	15.2	1087	23	918	19.5	1896	34.4
Cla016285	115	2.7	172	3.6	194	4.1	197	3.6
Cla014264	59	1.4	65	1.4	99	2.1	104	1.9
Cla018995	0	0	0	0	0	0	13	0.2
Cla020012	1565	36.8	2540	53.7	2760	58.6	4302	78
Cla019712	8	0.2	1	0	0	0	0	0
Cla018448	56	1.3	69	1.5	93	2	95	1.7
Cla011935	0	0	1	0	0	0	1	0
Cla019577	911	21.4	1033	21.8	733	15.6	1171	21.2
Cla020427	2	0	3	0.1	0	0	6	0.1
Cla012289	0	0	0	0	0	0	0	0
Cla002520	19	0.4	20	0.4	39	0.8	34	0.6
Cla017026	631	14.8	731	15.4	1012	21.5	1820	33
Cla005782	62	1.5	69	1.5	108	2.3	108	2
Cla009032	0	0	0	0	0	0	0	0
Cla022293	60	1.4	83	1.8	80	1.7	93	1.7
Cla005302	2	0	2	0	0	0	0	0
Cla019066	0	0	0	0	0	0	0	0
Cla020615	43	1	57	1.2	84	1.8	90	1.6
Cla021980	12	0.3	103	2.2	33	0.7	785	14.2
Cla004427	555	13	691	14.6	790	16.8	1043	18.9
Cla013468	31	0.7	30	0.6	37	0.8	45	0.8
Cla013793	94	2.2	119	2.5	112	2.4	153	2.8
Cla018159	0	0	1	0	4	0.1	9	0.2
Cla002059	0	0	1	0	0	0	3	0.1
Cla019206	402	9.4	471	9.9	346	7.4	276	5
Cla000581	0	0	0	0	0	0	0	0
Cla002682	94	2.2	82	1.7	124	2.6	155	2.8
Cla011833	575	13.5	913	19.3	1191	25.3	1809	32.8
Cla021385	212	5	333	7	590	12.5	588	10.7
Cla015534	361	8.5	628	13.3	292	6.2	265	4.8
Cla014788	2733	64.2	4656	98.4	4018	85.4	10011	181.6
Cla014691	35	0.8	37	0.8	111	2.4	52	0.9
Cla017187	883	20.7	1096	23.2	870	18.5	955	17.3
Cla021476	25	0.6	47	1	48	1	58	1.1
Cla017506	134	3.1	181	3.8	138	2.9	315	5.7
Cla001792	157	3.7	343	7.2	36	0.8	53	1
Cla012132	50	1.2	38	0.8	36	0.8	55	1
Cla010447	139	3.3	222	4.7	919	19.5	3206	58.2
Cla005606	4222	99.2	4899	103.5	3636	77.3	2888	52.4
Cla010308	406	9.5	506	10.7	507	10.8	910	16.5
Cla001769	157	3.7	216	4.6	365	7.8	521	9.5
Cla018643	99	2.3	73	1.5	77	1.6	73	1.3
Cla000841	145	3.4	177	3.7	300	6.4	488	8.9
Cla016794	7	0.2	4	0.1	3	0.1	11	0.2
Cla007839	405	9.5	576	12.2	283	6	437	7.9
Cla000544	150	3.5	234	4.9	188	4	272	4.9
Cla007340	84	2	105	2.2	109	2.3	108	2
Cla016231	68	1.6	131	2.8	191	4.1	304	5.5
Cla022183	48	1.1	104	2.2	142	3	522	9.5
Cla015759	0	0	0	0	0	0	0	0
Cla008543	291	6.8	341	7.2	544	11.6	262	4.8
Cla018355	446	10.5	518	10.9	514	10.9	489	8.9
Cla017265	0	0	0	0	0	0	0	0
Cla019556	555	13	812	17.2	1090	23.2	2404	43.6
Cla000669	31	0.7	22	0.5	35	0.7	24	0.4
Cla016961	41	1	38	0.8	6	0.1	2	0
Cla015146	2	0	0	0	2	0	0	0
Cla000692	0	0	0	0	0	0	1	0
Cla005567	454	10.7	693	14.6	992	21.1	1240	22.5
Cla000746	0	0	0	0	0	0	2	0
Cla001883	51	1.2	57	1.2	51	1.1	48	0.9
Cla014309	37	0.9	36	0.8	114	2.4	80	1.5
Cla004999	122	2.9	91	1.9	236	5	929	16.9
Cla010557	300	7	749	15.8	5162	109.7	3465	62.9
Cla006657	53	1.2	141	3	135	2.9	164	3
Cla022149	111	2.6	110	2.3	256	5.4	289	5.2
Cla007369	114	2.7	115	2.4	188	4	240	4.4
Cla011138	2492	58.5	2471	52.2	11068	235.2	2860	51.9
Cla008520	301	7.1	538	11.4	531	11.3	258	4.7
Cla014524	271	6.4	322	6.8	50	1.1	189	3.4
Cla000553	28	0.7	28	0.6	6	0.1	8	0.1
Cla007327	0	0	1	0	0	0	0	0
Cla019795	238	5.6	253	5.3	461	9.8	498	9
Cla006645	71	1.7	127	2.7	30	0.6	24	0.4
Cla018149	0	0	0	0	0	0	0	0
Cla009205	368	8.6	479	10.1	315	6.7	329	6
Cla020591	2	0	0	0	7	0.1	24	0.4
Cla013589	468	11	450	9.5	393	8.4	693	12.6
Cla017719	2	0	0	0	0	0	2	0
Cla023102	65	1.5	54	1.1	140	3	283	5.1
Cla016553	0	0	2	0	0	0	0	0
Cla015181	0	0	0	0	0	0	0	0
Cla010553	3	0.1	2	0	5	0.1	4	0.1
Cla012972	65	1.5	36	0.8	71	1.5	3950	71.7
Cla014178	177	4.2	214	4.5	245	5.2	146	2.6
Cla020542	552	13	672	14.2	763	16.2	978	17.7
Cla011537	96	2.3	163	3.4	309	6.6	932	16.9
Cla013823	1	0	0	0	0	0	0	0
Cla001655	2	0	2	0	0	0	2	0
Cla006538	3	0.1	2	0	1	0	2	0
Cla018880	24	0.6	32	0.7	31	0.7	15	0.3
Cla012447	1282	30.1	1778	37.6	1765	37.5	1912	34.7
Cla008229	676	15.9	995	21	1392	29.6	919	16.7
Cla012372	16	0.4	40	0.8	53	1.1	45	0.8
Cla003103	1123	26.4	2862	60.5	5216	110.8	7365	133.6
Cla014315	11	0.3	28	0.6	14	0.3	138	2.5
Cla013078	0	0	2	0	1	0	0	0
Cla015024	1533	36	1704	36	2013	42.8	549	10
Cla011254	322	7.6	224	4.7	886	18.8	635	11.5
Cla008014	0	0	0	0	0	0	0	0
Cla020483	374	8.8	517	10.9	400	8.5	410	7.4
Cla012162	11	0.3	6	0.1	7	0.1	15	0.3
Cla010820	648	15.2	808	17.1	125	2.7	21	0.4
Cla020522	704	16.5	1182	25	1343	28.5	1820	33
Cla008027	38	0.9	41	0.9	9	0.2	12	0.2
Cla005588	391	9.2	602	12.7	382	8.1	863	15.7
Cla020647	439	10.3	570	12	577	12.3	534	9.7
Cla002987	313	7.4	305	6.4	400	8.5	447	8.1
Cla012309	4	0.1	7	0.1	0	0	4	0.1
Cla022002	202	4.7	237	5	205	4.4	475	8.6
Cla015716	0	0	0	0	0	0	0	0
Cla000017	0	0	0	0	0	0	0	0
Cla017828	250	5.9	340	7.2	191	4.1	91	1.7
Cla006528	2186	51.3	1894	40	1385	29.4	954	17.3
Cla002206	76	1.8	139	2.9	40	0.8	56	1
Cla005996	266	6.2	496	10.5	988	21	983	17.8
Cla018703	56	1.3	140	3	167	3.5	110	2
Cla009355	2678	62.9	2199	46.5	843	17.9	639	11.6
Cla013070	909	21.4	1395	29.5	1465	31.1	2508	45.5
Cla001860	653	15.3	528	11.2	678	14.4	1141	20.7
Cla011031	4	0.1	4	0.1	1	0	49	0.9
Cla009520	46	1.1	81	1.7	92	2	123	2.2
Cla022917	34	0.8	21	0.4	21	0.4	42	0.8
Cla011647	580	13.6	719	15.2	464	9.9	311	5.6
Cla006115	0	0	0	0	0	0	0	0
Cla012421	976	22.9	1299	27.4	1698	36.1	1914	34.7
Cla020549	84	2	65	1.4	152	3.2	146	2.6
Cla009008	0	0	0	0	0	0	0	0
Cla005251	36	0.8	57	1.2	66	1.4	89	1.6
Cla017833	74	1.7	110	2.3	70	1.5	25	0.5
Cla002033	1124	26.4	1166	24.6	1274	27.1	2106	38.2
Cla020852	86	2	133	2.8	411	8.7	211	3.8
Cla020293	2865	67.3	2698	57	1018	21.6	4765	86.4
Cla000837	0	0	1	0	2	0	1	0
Cla014959	78	1.8	76	1.6	56	1.2	75	1.4
Cla008716	7	0.2	15	0.3	12	0.3	30	0.5
Cla014150	663	15.6	1191	25.2	182	3.9	390	7.1
Cla012145	21	0.5	25	0.5	44	0.9	34	0.6
Cla005360	220	5.2	307	6.5	421	8.9	543	9.9
Cla014542	0	0	0	0	0	0	0	0
Cla022403	349	8.2	428	9	387	8.2	618	11.2
Cla007740	503	11.8	567	12	245	5.2	451	8.2
Cla010798	121	2.8	145	3.1	111	2.4	298	5.4
Cla008123	195	4.6	337	7.1	322	6.8	467	8.5
Cla022918	58	1.4	11	0.2	10	0.2	6	0.1
Cla000251	0	0	0	0	0	0	0	0
Cla016592	140	3.3	184	3.9	181	3.8	249	4.5
Cla010364	0	0	0	0	0	0	0	0
Cla021933	229	5.4	221	4.7	321	6.8	388	7
Cla000935	0	0	0	0	1	0	0	0
Cla013317	198	4.7	292	6.2	278	5.9	601	10.9
Cla011868	52	1.2	71	1.5	99	2.1	110	2
Cla013810	52	1.2	85	1.8	160	3.4	124	2.2
Cla018719	28	0.7	30	0.6	9	0.2	12	0.2
Cla013455	19917	467.8	23178	489.6	6186	131.4	1613	29.3
Cla004558	0	0	0	0	0	0	0	0
Cla005013	0	0	0	0	0	0	0	0
Cla004436	0	0	0	0	0	0	0	0
Cla003822	48	1.1	60	1.3	67	1.4	172	3.1
Cla009300	17	0.4	17	0.4	6	0.1	23	0.4
Cla005581	114	2.7	156	3.3	88	1.9	118	2.1
Cla000704	1074	25.2	890	18.8	476	10.1	1402	25.4
Cla020986	59	1.4	63	1.3	58	1.2	70	1.3
Cla023413	209	4.9	339	7.2	128	2.7	375	6.8
Cla021845	898	21.1	778	16.4	698	14.8	326	5.9
Cla000036	748	17.6	1079	22.8	701	14.9	2418	43.9
Cla022108	616	14.5	754	15.9	248	5.3	562	10.2
Cla000236	36	0.8	42	0.9	28	0.6	41	0.7
Cla018082	35	0.8	62	1.3	48	1	70	1.3
Cla017210	97	2.3	490	10.4	119	2.5	154	2.8
Cla011384	1759	41.3	2209	46.7	1882	40	3082	55.9
Cla014952	147	3.5	241	5.1	284	6	388	7
Cla012057	219	5.1	365	7.7	430	9.1	1494	27.1
Cla022163	1227	28.8	1589	33.6	837	17.8	1437	26.1
Cla014710	17	0.4	5	0.1	21	0.4	20	0.4
Cla018749	71	1.7	107	2.3	106	2.3	231	4.2
Cla018110	409	9.6	220	4.6	77	1.6	24	0.4
Cla019769	42	1	36	0.8	111	2.4	967	17.5
Cla022401	67	1.6	55	1.2	145	3.1	208	3.8
Cla011414	336	7.9	875	18.5	71	1.5	2498	45.3
Cla002337	34	0.8	135	2.9	369	7.8	2	0
Cla022900	689	16.2	853	18	762	16.2	910	16.5
Cla021293	224	5.3	300	6.3	469	10	558	10.1
Cla003913	224	5.3	270	5.7	520	11	213	3.9
Cla015037	2359	55.4	3662	77.4	415	8.8	438	7.9
Cla008870	0	0	0	0	0	0	3	0.1
Cla005917	326	7.7	586	12.4	297	6.3	489	8.9
Cla016652	2	0	3	0.1	1	0	12	0.2
Cla002824	32	0.8	10	0.2	8	0.2	811	14.7
Cla017153	67	1.6	93	2	57	1.2	223	4
Cla021636	1	0	3	0.1	7	0.1	65	1.2
Cla014168	5622	132.1	7626	161.1	2200	46.7	1923	34.9
Cla012683	1448	34	1820	38.4	1905	40.5	2959	53.7
Cla009924	207	4.9	331	7	301	6.4	397	7.2
Cla004390	0	0	0	0	0	0	0	0
Cla020971	171	4	394	8.3	799	17	1437	26.1
Cla021884	388	9.1	394	8.3	550	11.7	608	11
Cla022423	60	1.4	19	0.4	31	0.7	56	1
Cla012325	348	8.2	406	8.6	385	8.2	660	12
Cla006049	1825	42.9	1829	38.6	1261	26.8	1052	19.1
Cla020989	261	6.1	283	6	247	5.2	414	7.5
Cla014159	0	0	0	0	1	0	4	0.1
Cla000060	0	0	0	0	0	0	21	0.4
Cla016864	69	1.6	87	1.8	147	3.1	229	4.2
Cla001241	65	1.5	53	1.1	104	2.2	82	1.5
Cla015062	71	1.7	122	2.6	330	7	1061	19.2
Cla001401	0	0	0	0	2	0	0	0
Cla016289	54	1.3	41	0.9	31	0.7	52	0.9
Cla010593	277	6.5	438	9.3	365	7.8	989	17.9
Cla007208	0	0	0	0	0	0	0	0
Cla001903	453	10.6	682	14.4	492	10.5	1213	22
Cla002888	0	0	1	0	0	0	0	0
Cla023203	15	0.4	20	0.4	46	1	97	1.8
Cla015668	107	2.5	208	4.4	148	3.1	2487	45.1
Cla021504	917	21.5	1177	24.9	211	4.5	268	4.9
Cla003418	12	0.3	15	0.3	15	0.3	22	0.4
Cla020978	13	0.3	41	0.9	10	0.2	43	0.8
Cla003051	0	0	8	0.2	1	0	1	0
Cla017055	37	0.9	114	2.4	257	5.5	1581	28.7
Cla005037	297	7	485	10.2	547	11.6	645	11.7
Cla020820	2369	55.6	3453	72.9	880	18.7	674	12.2
Cla004596	1441	33.8	2305	48.7	2200	46.7	2195	39.8
Cla010517	22	0.5	32	0.7	22	0.5	23	0.4
Cla017279	72	1.7	98	2.1	109	2.3	182	3.3
Cla022174	738	17.3	801	16.9	484	10.3	228	4.1
Cla011510	4	0.1	10	0.2	20	0.4	21	0.4
Cla013679	39	0.9	41	0.9	42	0.9	47	0.9
Cla001188	0	0	0	0	0	0	3	0.1
Cla010289	31	0.7	59	1.2	45	1	39	0.7
Cla003527	0	0	0	0	0	0	0	0
Cla012472	4	0.1	3	0.1	1	0	0	0
Cla011018	42	1	59	1.2	142	3	125	2.3
Cla018195	555	13	721	15.2	2306	49	1899	34.4
Cla021527	0	0	0	0	0	0	1	0
Cla020538	134	3.1	186	3.9	224	4.8	306	5.6
Cla013411	4	0.1	2	0	0	0	2	0
Cla005030	25	0.6	25	0.5	43	0.9	32	0.6
Cla010596	93	2.2	171	3.6	188	4	574	10.4
Cla011445	157	3.7	203	4.3	272	5.8	200	3.6
Cla004448	4	0.1	3	0.1	0	0	6	0.1
Cla019686	3	0.1	1	0	2	0	0	0
Cla008059	0	0	0	0	0	0	0	0
Cla019646	2	0	0	0	0	0	0	0
Cla013976	333	7.8	405	8.6	485	10.3	571	10.4
Cla014071	99	2.3	74	1.6	138	2.9	103	1.9
Cla003181	88	2.1	148	3.1	78	1.7	186	3.4
Cla005489	90	2.1	140	3	79	1.7	284	5.2
Cla004092	465	10.9	726	15.3	7501	159.4	3337	60.5
Cla000864	0	0	0	0	0	0	0	0
Cla010241	411	9.7	914	19.3	1922	40.8	3418	62
Cla009834	1	0	6	0.1	4	0.1	3	0.1
Cla009247	0	0	0	0	0	0	0	0
Cla003552	0	0	0	0	0	0	0	0
Cla010543	4	0.1	3	0.1	4	0.1	5	0.1
Cla006875	888	20.9	1425	30.1	463	9.8	192	3.5
Cla004461	141	3.3	75	1.6	28	0.6	8	0.1
Cla012340	0	0	0	0	0	0	0	0
Cla008357	575	13.5	1576	33.3	3852	81.8	413	7.5
Cla002856	1207	28.4	2350	49.6	1381	29.3	2963	53.7
Cla008205	1586	37.3	1978	41.8	462	9.8	1992	36.1
Cla021209	588	13.8	596	12.6	345	7.3	564	10.2
Cla006248	46	1.1	70	1.5	49	1	695	12.6
Cla008070	201	4.7	281	5.9	374	7.9	497	9
Cla010495	54	1.3	40	0.8	93	2	181	3.3
Cla005068	282	6.6	470	9.9	472	10	371	6.7
Cla017571	131	3.1	246	5.2	1235	26.2	553	10
Cla023453	69	1.6	147	3.1	86	1.8	303	5.5
Cla017694	671	15.8	844	17.8	499	10.6	462	8.4
Cla003077	0	0	0	0	0	0	0	0
Cla005298	252	5.9	416	8.8	683	14.5	748	13.6
Cla007085	106	2.5	162	3.4	169	3.6	309	5.6
Cla021594	19	0.4	73	1.5	81	1.7	119	2.2
Cla000345	0	0	0	0	0	0	0	0
Cla015535	20	0.5	11	0.2	33	0.7	61	1.1
Cla015088	772	18.1	1002	21.2	887	18.8	1880	34.1
Cla011807	120	2.8	265	5.6	65	1.4	121	2.2
Cla016124	112	2.6	181	3.8	243	5.2	302	5.5
Cla004107	0	0	6	0.1	5	0.1	8	0.1
Cla023077	0	0	0	0	0	0	5	0.1
Cla010911	173	4.1	266	5.6	324	6.9	505	9.2
Cla008780	1557	36.6	1768	37.3	1297	27.6	1359	24.7
Cla023049	36	0.8	54	1.1	62	1.3	48	0.9
Cla003871	1	0	1	0	0	0	1	0
Cla017774	788	18.5	1831	38.7	958	20.4	38	0.7
Cla020789	193	4.5	229	4.8	126	2.7	161	2.9
Cla007110	7	0.2	16	0.3	19	0.4	145	2.6
Cla004629	1258	29.5	2132	45	2468	52.4	3177	57.6
Cla004952	276	6.5	185	3.9	299	6.4	317	5.8
Cla000181	49	1.2	20	0.4	17	0.4	11	0.2
Cla006521	24	0.6	25	0.5	3	0.1	2	0
Cla013522	349	8.2	437	9.2	669	14.2	1293	23.5
Cla001050	4	0.1	4	0.1	37	0.8	29	0.5
Cla008725	0	0	0	0	0	0	0	0
Cla005755	10	0.2	18	0.4	12	0.3	12	0.2
Cla022449	1	0	1	0	1	0	0	0
Cla002403	0	0	0	0	0	0	0	0
Cla014924	0	0	0	0	0	0	6	0.1
Cla012792	753	17.7	765	16.2	720	15.3	1521	27.6
Cla004488	32	0.8	7	0.1	0	0	1	0
Cla004062	229	5.4	347	7.3	547	11.6	329	6
Cla001357	4	0.1	1	0	1	0	4	0.1
Cla006395	0	0	1	0	1	0	0	0
Cla010602	145	3.4	290	6.1	189	4	439	8
Cla006045	0	0	0	0	0	0	0	0
Cla008032	0	0	0	0	0	0	0	0
Cla020862	248	5.8	263	5.6	394	8.4	550	10
Cla001520	0	0	0	0	0	0	0	0
Cla000447	0	0	0	0	0	0	0	0
Cla001321	600	14.1	717	15.1	1481	31.5	3228	58.6
Cla016143	83	1.9	72	1.5	135	2.9	99	1.8
Cla014875	970	22.8	1386	29.3	1920	40.8	2645	48
Cla022614	119	2.8	138	2.9	183	3.9	208	3.8
Cla008269	0	0	6	0.1	0	0	1	0
Cla019135	7285	171.1	5888	124.4	2993	63.6	2500	45.4
Cla008860	85	2	75	1.6	42	0.9	81	1.5
Cla005264	78	1.8	177	3.7	137	2.9	232	4.2
Cla006128	3	0.1	1	0	0	0	1	0
Cla009698	14	0.3	19	0.4	20	0.4	33	0.6
Cla001819	284	6.7	133	2.8	13	0.3	29	0.5
Cla008814	3	0.1	4	0.1	8	0.2	4	0.1
Cla014793	161	3.8	213	4.5	411	8.7	534	9.7
Cla002015	227	5.3	376	7.9	506	10.8	869	15.8
Cla018228	538	12.6	758	16	726	15.4	549	10
Cla010561	0	0	0	0	0	0	0	0
Cla011293	965	22.7	1030	21.8	1539	32.7	1307	23.7
Cla000756	34	0.8	59	1.2	48	1	41	0.7
Cla018753	94	2.2	127	2.7	233	5	268	4.9
Cla015517	220	5.2	146	3.1	56	1.2	172	3.1
Cla011396	1321	31	2286	48.3	7009	148.9	8753	158.8
Cla000380	2	0	3	0.1	3	0.1	4	0.1
Cla019926	535	12.6	602	12.7	668	14.2	884	16
Cla000177	0	0	5	0.1	6	0.1	21	0.4
Cla021065	225	5.3	276	5.8	642	13.6	812	14.7
Cla021332	457	10.7	656	13.9	612	13	709	12.9
Cla014456	116	2.7	232	4.9	101	2.1	142	2.6
Cla020380	192	4.5	269	5.7	222	4.7	342	6.2
Cla022274	64	1.5	105	2.2	40	0.8	34	0.6
Cla000679	1	0	0	0	0	0	1	0
Cla002894	93	2.2	197	4.2	151	3.2	152	2.8
Cla020396	79	1.9	105	2.2	175	3.7	376	6.8
Cla015251	430	10.1	511	10.8	480	10.2	973	17.7
Cla017723	60	1.4	114	2.4	327	6.9	270	4.9
Cla022791	23	0.5	45	1	11	0.2	65	1.2
Cla003432	65	1.5	66	1.4	41	0.9	73	1.3
Cla009892	51	1.2	88	1.9	79	1.7	81	1.5
Cla017451	887	20.8	1201	25.4	1216	25.8	2087	37.9
Cla003467	44	1	80	1.7	32	0.7	38	0.7
Cla017040	4	0.1	1	0	5	0.1	1	0
Cla012843	0	0	0	0	0	0	0	0
Cla005850	171	4	250	5.3	186	4	355	6.4
Cla012981	134	3.1	232	4.9	161	3.4	303	5.5
Cla019368	17084	401.3	19022	401.8	6220	132.2	2012	36.5
Cla014256	409	9.6	360	7.6	46	1	178	3.2
Cla002382	2	0	1	0	3	0.1	3	0.1
Cla007078	937	22	5170	109.2	9138	194.2	45	0.8
Cla001872	187	4.4	387	8.2	335	7.1	356	6.5
Cla012852	68	1.6	65	1.4	71	1.5	186	3.4
Cla019464	554	13	719	15.2	541	11.5	668	12.1
Cla010222	176	4.1	435	9.2	282	6	213	3.9
Cla003846	54	1.3	77	1.6	55	1.2	110	2
Cla007907	91	2.1	150	3.2	164	3.5	245	4.4
Cla001001	148	3.5	137	2.9	442	9.4	374	6.8
Cla015250	1840	43.2	2408	50.9	2076	44.1	766	13.9
Cla010089	71	1.7	98	2.1	150	3.2	260	4.7
Cla005369	128	3	187	4	181	3.8	253	4.6
Cla007270	122	2.9	156	3.3	206	4.4	246	4.5
Cla016163	0	0	0	0	0	0	0	0
Cla001318	97	2.3	124	2.6	211	4.5	281	5.1
Cla000373	1	0	1	0	3	0.1	38	0.7
Cla021361	5	0.1	6	0.1	4	0.1	17	0.3
Cla005074	11	0.3	9	0.2	4	0.1	14	0.3
Cla022335	216	5.1	92	1.9	0	0	0	0
Cla012106	34	0.8	50	1.1	35	0.7	27	0.5
Cla022798	0	0	0	0	0	0	0	0
Cla005359	569	13.4	658	13.9	389	8.3	440	8
Cla000088	5	0.1	2	0	4	0.1	8	0.1
Cla017272	1	0	1	0	0	0	17	0.3
Cla004322	142	3.3	150	3.2	64	1.4	136	2.5
Cla023282	33	0.8	54	1.1	34	0.7	54	1
Cla017929	178	4.2	300	6.3	405	8.6	760	13.8
Cla005693	588	13.8	913	19.3	2293	48.7	2810	51
Cla021497	3	0.1	11	0.2	4	0.1	16	0.3
Cla019395	307	7.2	513	10.8	485	10.3	718	13
Cla015159	40	0.9	64	1.4	79	1.7	32	0.6
Cla022548	2	0	5	0.1	2	0	2	0
Cla000590	0	0	0	0	0	0	0	0
Cla008317	66	1.6	52	1.1	108	2.3	138	2.5
Cla003300	216	5.1	233	4.9	256	5.4	429	7.8
Cla000262	3	0.1	0	0	2	0	3	0.1
Cla003367	503	11.8	856	18.1	1520	32.3	658	11.9
Cla020376	1	0	6	0.1	11	0.2	41	0.7
Cla013365	90	2.1	100	2.1	106	2.3	139	2.5
Cla012957	0	0	0	0	1	0	0	0
Cla006773	92	2.2	70	1.5	83	1.8	99	1.8
Cla010908	5	0.1	26	0.5	9	0.2	47	0.9
Cla011948	0	0	0	0	1	0	2	0
Cla003256	673	15.8	1095	23.1	951	20.2	1117	20.3
Cla017512	0	0	0	0	0	0	0	0
Cla005428	1079	25.3	1599	33.8	1625	34.5	2457	44.6
Cla008350	198	4.7	253	5.3	459	9.8	551	10
Cla015899	302	7.1	404	8.5	489	10.4	660	12
Cla009237	2	0	0	0	0	0	2	0
Cla002959	214	5	148	3.1	37	0.8	44	0.8
Cla011036	20	0.5	18	0.4	50	1.1	27	0.5
Cla018399	24	0.6	16	0.3	23	0.5	101	1.8
Cla010119	18	0.4	27	0.6	38	0.8	90	1.6
Cla000929	0	0	0	0	0	0	0	0
Cla012803	27	0.6	36	0.8	31	0.7	56	1
Cla013418	217	5.1	265	5.6	43	0.9	39	0.7
Cla002660	0	0	0	0	0	0	0	0
Cla013182	26	0.6	33	0.7	13	0.3	5	0.1
Cla009125	163	3.8	193	4.1	235	5	249	4.5
Cla010390	287	6.7	470	9.9	277	5.9	626	11.4
Cla013831	0	0	0	0	0	0	0	0
Cla007554	7	0.2	9	0.2	15	0.3	14	0.3
Cla008406	59	1.4	86	1.8	155	3.3	312	5.7
Cla000356	1	0	0	0	0	0	1	0
Cla015273	99	2.3	93	2	218	4.6	307	5.6
Cla009397	135	3.2	119	2.5	132	2.8	185	3.4
Cla008280	49	1.2	95	2	35	0.7	100	1.8
Cla011454	77	1.8	60	1.3	62	1.3	83	1.5
Cla013686	255	6	404	8.5	298	6.3	134	2.4
Cla018811	1557	36.6	1975	41.7	1966	41.8	4668	84.7
Cla000135	0	0	1	0	0	0	2	0
Cla011145	2797	65.7	2641	55.8	3056	64.9	732	13.3
Cla002405	40	0.9	42	0.9	165	3.5	296	5.4
Cla023005	91	2.1	101	2.1	172	3.7	423	7.7
Cla004190	0	0	0	0	0	0	0	0
Cla008962	573	13.5	830	17.5	1122	23.8	1651	29.9
Cla002464	0	0	0	0	0	0	0	0
Cla007364	0	0	0	0	0	0	0	0
Cla018184	611	14.4	722	15.3	229	4.9	1126	20.4
Cla000186	0	0	0	0	0	0	0	0
Cla014468	109	2.6	151	3.2	316	6.7	296	5.4
Cla006766	0	0	1	0	0	0	1	0
Cla001071	447	10.5	728	15.4	1307	27.8	1413	25.6
Cla019506	133	3.1	206	4.4	85	1.8	166	3
Cla007644	35	0.8	464	9.8	14	0.3	766	13.9
Cla007053	669	15.7	692	14.6	896	19	998	18.1
Cla023455	274	6.4	221	4.7	268	5.7	213	3.9
Cla015027	48	1.1	65	1.4	33	0.7	52	0.9
Cla008752	112	2.6	113	2.4	330	7	269	4.9
Cla010916	341	8	619	13.1	1255	26.7	3582	65
Cla011179	4	0.1	3	0.1	2	0	1	0
Cla016521	2	0	0	0	1	0	4	0.1
Cla002939	0	0	4	0.1	4	0.1	5	0.1
Cla023345	287	6.7	424	9	151	3.2	300	5.4
Cla001428	0	0	0	0	0	0	0	0
Cla023289	233	5.5	385	8.1	277	5.9	422	7.7
Cla009715	10	0.2	0	0	2	0	53	1
Cla005538	5	0.1	5	0.1	0	0	2	0
Cla008690	123	2.9	197	4.2	222	4.7	296	5.4
Cla019355	0	0	0	0	0	0	0	0
Cla016343	103	2.4	115	2.4	59	1.3	63	1.1
Cla002345	573	13.5	477	10.1	706	15	1471	26.7
Cla019362	135	3.2	125	2.6	162	3.4	61	1.1
Cla004570	16	0.4	23	0.5	23	0.5	42	0.8
Cla019484	4	0.1	2	0	5	0.1	3	0.1
Cla005051	472	11.1	602	12.7	763	16.2	1079	19.6
Cla011880	1	0	1	0	2	0	2	0
Cla020361	158	3.7	185	3.9	77	1.6	127	2.3
Cla015885	1048	24.6	1305	27.6	400	8.5	574	10.4
Cla010259	402	9.4	407	8.6	533	11.3	1682	30.5
Cla010057	559	13.1	654	13.8	671	14.3	1071	19.4
Cla006999	166	3.9	345	7.3	183	3.9	315	5.7
Cla000535	158	3.7	60	1.3	24	0.5	47	0.9
Cla013942	21108	495.8	24417	515.8	15596	331.4	6434	116.7
Cla023317	7	0.2	12	0.3	17	0.4	22	0.4
Cla017971	750	17.6	840	17.7	741	15.7	1811	32.9
Cla015174	0	0	0	0	0	0	0	0
Cla002587	353	8.3	498	10.5	1003	21.3	892	16.2
Cla005798	7	0.2	21	0.4	16	0.3	27	0.5
Cla001307	132	3.1	181	3.8	301	6.4	504	9.1
Cla002829	86	2	142	3	243	5.2	450	8.2
Cla011753	0	0	0	0	3	0.1	5	0.1
Cla011433	95	2.2	105	2.2	41	0.9	33	0.6
Cla022437	1097	25.8	1423	30.1	1859	39.5	1651	29.9
Cla022365	103	2.4	28	0.6	23	0.5	25	0.5
Cla000188	0	0	0	0	0	0	0	0
Cla014891	1430	33.6	2094	44.2	2422	51.5	4145	75.2
Cla011778	4	0.1	6	0.1	5	0.1	3	0.1
Cla008283	22	0.5	41	0.9	51	1.1	42	0.8
Cla018408	604	14.2	859	18.1	437	9.3	261	4.7
Cla008926	60	1.4	51	1.1	93	2	117	2.1
Cla002388	0	0	0	0	0	0	0	0
Cla002070	0	0	0	0	0	0	0	0
Cla005945	322	7.6	374	7.9	611	13	1268	23
Cla012928	205	4.8	209	4.4	539	11.5	2009	36.4
Cla022535	0	0	1	0	0	0	2	0
Cla022150	37	0.9	69	1.5	70	1.5	126	2.3
Cla017941	1185	27.8	1568	33.1	4345	92.3	11838	214.7
Cla005031	570	13.4	911	19.2	989	21	1479	26.8
Cla017085	0	0	0	0	0	0	1	0
Cla016026	91	2.1	117	2.5	408	8.7	358	6.5
Cla014136	2800	65.8	3103	65.5	580	12.3	146	2.6
Cla007374	244	5.7	358	7.6	519	11	732	13.3
Cla020827	75	1.8	69	1.5	143	3	159	2.9
Cla003779	2	0	0	0	0	0	0	0
Cla022493	0	0	0	0	0	0	0	0
Cla019406	196	4.6	341	7.2	369	7.8	562	10.2
Cla013195	346	8.1	475	10	494	10.5	540	9.8
Cla002910	1171	27.5	1458	30.8	1157	24.6	951	17.3
Cla004507	0	0	0	0	0	0	0	0
Cla020459	0	0	0	0	0	0	0	0
Cla003724	32	0.8	50	1.1	57	1.2	49	0.9
Cla014872	248	5.8	318	6.7	498	10.6	278	5
Cla010463	117	2.7	110	2.3	142	3	190	3.4
Cla006405	0	0	0	0	0	0	0	0
Cla002633	0	0	2	0	0	0	7	0.1
Cla021939	43	1	39	0.8	70	1.5	81	1.5
Cla009383	3391	79.6	2835	59.9	884	18.8	101	1.8
Cla004422	83	1.9	65	1.4	16	0.3	17	0.3
Cla015500	65	1.5	75	1.6	24	0.5	15	0.3
Cla023222	72	1.7	103	2.2	95	2	171	3.1
Cla002932	142	3.3	212	4.5	273	5.8	363	6.6
Cla009873	446	10.5	522	11	466	9.9	661	12
Cla022541	120	2.8	125	2.6	301	6.4	185	3.4
Cla014351	411	9.7	622	13.1	535	11.4	1467	26.6
Cla001436	0	0	0	0	0	0	0	0
Cla015492	0	0	0	0	0	0	0	0
Cla010929	16	0.4	14	0.3	0	0	0	0
Cla013160	0	0	5	0.1	0	0	1	0
Cla008253	208	4.9	308	6.5	110	2.3	42	0.8
Cla022779	482	11.3	637	13.5	881	18.7	1368	24.8
Cla007318	0	0	0	0	0	0	0	0
Cla017170	92	2.2	150	3.2	188	4	258	4.7
Cla002952	0	0	0	0	0	0	0	0
Cla008422	2	0	0	0	0	0	0	0
Cla000305	69	1.6	122	2.6	50	1.1	104	1.9
Cla001839	118	2.8	175	3.7	192	4.1	193	3.5
Cla007280	1060	24.9	1403	29.6	882	18.7	515	9.3
Cla020577	97	2.3	171	3.6	65	1.4	265	4.8
Cla004003	2260	53.1	2815	59.5	3904	83	8878	161
Cla017347	0	0	0	0	0	0	0	0
Cla003616	2	0	0	0	12	0.3	35	0.6
Cla007597	26	0.6	31	0.7	45	1	63	1.1
Cla006225	0	0	0	0	0	0	0	0
Cla019130	89	2.1	127	2.7	104	2.2	4	0.1
Cla002761	190	4.5	324	6.8	553	11.8	478	8.7
Cla018481	161	3.8	77	1.6	23	0.5	4	0.1
Cla017331	1007	23.7	1542	32.6	166	3.5	171	3.1
Cla007151	146	3.4	218	4.6	171	3.6	237	4.3
Cla006696	71	1.7	39	0.8	9	0.2	6	0.1
Cla023111	196	4.6	225	4.8	188	4	225	4.1
Cla013507	95	2.2	132	2.8	162	3.4	144	2.6
Cla007913	67	1.6	88	1.9	174	3.7	206	3.7
Cla020464	1047	24.6	1181	24.9	355	7.5	100	1.8
Cla021284	9	0.2	12	0.3	134	2.8	163	3
Cla022210	114	2.7	173	3.7	345	7.3	239	4.3
Cla012539	113	2.7	142	3	125	2.7	149	2.7
Cla015131	63	1.5	128	2.7	0	0	2	0
Cla021032	2260	53.1	3030	64	1720	36.5	4413	80.1
Cla022909	991	23.3	1318	27.8	6106	129.7	9410	170.7
Cla020333	1883	44.2	2146	45.3	1626	34.6	1949	35.4
Cla019831	641	15.1	926	19.6	1150	24.4	1434	26
Cla015781	1	0	0	0	0	0	0	0
Cla004211	18	0.4	60	1.3	30	0.6	72	1.3
Cla023242	46	1.1	28	0.6	65	1.4	121	2.2
Cla022522	30	0.7	67	1.4	46	1	220	4
Cla010838	933	21.9	800	16.9	1098	23.3	1486	27
Cla017096	136	3.2	283	6	915	19.4	499	9.1
Cla007910	1254	29.5	1522	32.1	1413	30	2530	45.9
Cla000783	657	15.4	781	16.5	1098	23.3	1284	23.3
Cla013224	969	22.8	1402	29.6	1239	26.3	518	9.4
Cla016833	330	7.8	194	4.1	117	2.5	240	4.4
Cla017668	50	1.2	53	1.1	113	2.4	124	2.2
Cla006282	1	0	1	0	3	0.1	2	0
Cla017548	171	4	222	4.7	195	4.1	283	5.1
Cla021228	156	3.7	315	6.7	306	6.5	285	5.2
Cla005541	88	2.1	143	3	69	1.5	84	1.5
Cla018853	622	14.6	702	14.8	523	11.1	976	17.7
Cla013875	106	2.5	124	2.6	1348	28.6	4308	78.1
Cla005677	9	0.2	17	0.4	2	0	6	0.1
Cla013569	64	1.5	105	2.2	7	0.1	11	0.2
Cla012083	13	0.3	5	0.1	16	0.3	19	0.3
Cla002706	7	0.2	6	0.1	3	0.1	4	0.1
Cla017449	193	4.5	170	3.6	264	5.6	360	6.5
Cla023138	643	15.1	531	11.2	900	19.1	1267	23
Cla018016	604	14.2	498	10.5	876	18.6	668	12.1
Cla006956	29	0.7	20	0.4	21	0.4	6	0.1
Cla006439	26	0.6	29	0.6	25	0.5	40	0.7
Cla015202	44	1	55	1.2	59	1.3	106	1.9
Cla010216	149	3.5	263	5.6	246	5.2	333	6
Cla019384	369	8.7	3259	68.8	371	7.9	596	10.8
Cla000195	1	0	1	0	0	0	1	0
Cla019497	281	6.6	409	8.6	571	12.1	1003	18.2
Cla001370	22	0.5	53	1.1	4	0.1	4	0.1
Cla021752	50	1.2	74	1.6	8	0.2	15	0.3
Cla020001	0	0	0	0	0	0	0	0
Cla004431	622	14.6	1245	26.3	870	18.5	4780	86.7
Cla019851	17	0.4	7	0.1	0	0	2	0
Cla010099	321	7.5	429	9.1	896	19	1055	19.1
Cla005599	81	1.9	84	1.8	83	1.8	99	1.8
Cla013461	13	0.3	8	0.2	6	0.1	17	0.3
Cla005084	82	1.9	115	2.4	147	3.1	272	4.9
Cla016929	105	2.5	152	3.2	239	5.1	433	7.9
Cla019817	12	0.3	7	0.1	16	0.3	48	0.9
Cla008619	649	15.2	1387	29.3	1287	27.3	2703	49
Cla022573	630	14.8	795	16.8	568	12.1	342	6.2
Cla002188	0	0	0	0	0	0	0	0
Cla013406	127	3	251	5.3	521	11.1	583	10.6
Cla016150	9	0.2	14	0.3	7	0.1	18	0.3
Cla023269	125	2.9	478	10.1	567	12	6734	122.2
Cla022391	0	0	0	0	0	0	0	0
Cla018827	628	14.8	708	15	771	16.4	1069	19.4
Cla007585	11	0.3	44	0.9	4	0.1	1	0
Cla014505	1	0	1	0	0	0	1	0
Cla000397	449	10.5	564	11.9	381	8.1	642	11.6
Cla020907	133	3.1	139	2.9	136	2.9	183	3.3
Cla010895	65	1.5	33	0.7	75	1.6	72	1.3
Cla011029	252	5.9	337	7.1	476	10.1	504	9.1
Cla006672	91	2.1	90	1.9	145	3.1	179	3.2
Cla012300	0	0	2	0	0	0	0	0
Cla001472	1	0	1	0	5	0.1	5	0.1
Cla005794	14	0.3	27	0.6	20	0.4	20	0.4
Cla023060	332	7.8	315	6.7	452	9.6	604	11
Cla010163	1364	32	1745	36.9	2475	52.6	4259	77.3
Cla016444	6	0.1	4	0.1	0	0	0	0
Cla008735	69	1.6	161	3.4	6	0.1	9	0.2
Cla013116	10	0.2	9	0.2	2	0	0	0
Cla008173	9	0.2	16	0.3	17	0.4	23	0.4
Cla010679	107	2.5	154	3.3	188	4	272	4.9
Cla022841	285	6.7	453	9.6	540	11.5	686	12.4
Cla004113	0	0	0	0	0	0	0	0
Cla021351	18	0.4	33	0.7	39	0.8	32	0.6
Cla005731	0	0	0	0	0	0	0	0
Cla007311	2171	51	2899	61.2	6063	128.8	9827	178.3
Cla014398	39	0.9	36	0.8	73	1.6	56	1
Cla008587	11	0.3	37	0.8	24	0.5	53	1
Cla003908	0	0	0	0	0	0	0	0
Cla006611	178	4.2	189	4	152	3.2	313	5.7
Cla007449	842	19.8	1311	27.7	495	10.5	223	4
Cla023273	4	0.1	10	0.2	11	0.2	26	0.5
Cla016730	58	1.4	59	1.2	24	0.5	31	0.6
Cla010475	13	0.3	40	0.8	46	1	456	8.3
Cla012573	0	0	2	0	3	0.1	0	0
Cla021863	692	16.3	590	12.5	147	3.1	510	9.3
Cla000878	211	5	249	5.3	204	4.3	535	9.7
Cla004923	106	2.5	45	1	39	0.8	102	1.9
Cla022556	19	0.4	8	0.2	0	0	15	0.3
Cla006907	13	0.3	24	0.5	19	0.4	17	0.3
Cla011198	3	0.1	9	0.2	0	0	9	0.2
Cla012986	0	0	0	0	0	0	0	0
Cla017192	3365	79	6562	138.6	4420	93.9	3652	66.2
Cla007336	454	10.7	558	11.8	935	19.9	1411	25.6
Cla002643	100	2.3	126	2.7	340	7.2	1251	22.7
Cla009776	5	0.1	4	0.1	0	0	0	0
Cla010912	2129	50	4927	104.1	397	8.4	56	1
Cla004362	0	0	4	0.1	2	0	8	0.1
Cla017032	74	1.7	181	3.8	11	0.2	303	5.5
Cla011859	0	0	1	0	5	0.1	0	0
Cla005672	204	4.8	311	6.6	401	8.5	539	9.8
Cla023360	1161	27.3	1334	28.2	1279	27.2	725	13.2
Cla022227	146	3.4	179	3.8	354	7.5	480	8.7
Cla014288	14	0.3	35	0.7	8	0.2	24	0.4
Cla014847	67	1.6	78	1.6	77	1.6	102	1.9
Cla014382	206	4.8	200	4.2	199	4.2	733	13.3
Cla008146	26	0.6	53	1.1	40	0.8	67	1.2
Cla010998	1457	34.2	896	18.9	680	14.4	1761	31.9
Cla009281	572	13.4	856	18.1	1131	24	1964	35.6
Cla011752	164	3.9	288	6.1	546	11.6	799	14.5
Cla022482	0	0	0	0	0	0	0	0
Cla000647	20	0.5	16	0.3	11	0.2	19	0.3
Cla014378	313	7.4	493	10.4	412	8.8	502	9.1
Cla002426	137	3.2	157	3.3	120	2.5	149	2.7
Cla017067	11	0.3	7	0.1	8	0.2	10	0.2
Cla015605	197	4.6	223	4.7	275	5.8	140	2.5
Cla020405	377	8.9	516	10.9	577	12.3	1228	22.3
Cla008985	0	0	1	0	2	0	0	0
Cla010399	0	0	0	0	0	0	0	0
Cla020450	92	2.2	127	2.7	232	4.9	643	11.7
Cla017305	0	0	3	0.1	0	0	0	0
Cla008494	230	5.4	109	2.3	47	1	71	1.3
Cla014577	24	0.6	31	0.7	53	1.1	28	0.5
Cla020510	648	15.2	690	14.6	1468	31.2	4059	73.6
Cla005745	2	0	1	0	2	0	3	0.1
Cla001799	139	3.3	248	5.2	563	12	365	6.6
Cla012776	127	3	203	4.3	141	3	238	4.3
Cla008274	203	4.8	214	4.5	470	10	478	8.7
Cla009960	534	12.5	699	14.8	806	17.1	1127	20.4
Cla007421	6	0.1	5	0.1	3	0.1	4	0.1
Cla016661	40	0.9	41	0.9	0	0	0	0
Cla018712	38	0.9	61	1.3	50	1.1	162	2.9
Cla006616	284	6.7	611	12.9	450	9.6	298	5.4
Cla010264	0	0	0	0	0	0	0	0
Cla008310	82	1.9	82	1.7	104	2.2	116	2.1
Cla022568	4705	110.5	5635	119	9609	204.2	14857	269.5
Cla022287	75	1.8	88	1.9	109	2.3	157	2.8
Cla013019	8	0.2	14	0.3	16	0.3	0	0
Cla002457	2	0	3	0.1	1	0	3	0.1
Cla002363	0	0	0	0	0	0	0	0
Cla016764	216	5.1	485	10.2	5739	121.9	3296	59.8
Cla017711	1801	42.3	3619	76.4	3067	65.2	5574	101.1
Cla000453	178	4.2	179	3.8	260	5.5	300	5.4
Cla004016	187	4.4	303	6.4	77	1.6	76	1.4
Cla022471	1	0	8	0.2	2	0	8	0.1
Cla012532	129	3	215	4.5	272	5.8	426	7.7
Cla010204	227	5.3	281	5.9	432	9.2	646	11.7
Cla018954	42	1	87	1.8	14	0.3	55	1
Cla007497	584	13.7	21429	452.7	1415	30.1	2068	37.5
Cla021579	2421	56.9	2082	44	589	12.5	568	10.3
Cla007848	114	2.7	127	2.7	74	1.6	163	3
Cla013915	65	1.5	16	0.3	10	0.2	5	0.1
Cla004473	6165	144.8	11195	236.5	7198	152.9	12960	235.1
Cla022155	39	0.9	20	0.4	5	0.1	7	0.1
Cla010558	0	0	0	0	0	0	0	0
Cla004745	175	4.1	217	4.6	180	3.8	369	6.7
Cla011703	317	7.4	492	10.4	376	8	349	6.3
Cla002266	307	7.2	455	9.6	380	8.1	246	4.5
Cla001745	0	0	0	0	0	0	7	0.1
Cla021246	2085	49	1597	33.7	5549	117.9	3187	57.8
Cla003924	10	0.2	8	0.2	1	0	1	0
Cla009230	163	3.8	247	5.2	355	7.5	249	4.5
Cla022911	34	0.8	14	0.3	2	0	0	0
Cla018587	9	0.2	8	0.2	7	0.1	2	0
Cla005683	96	2.3	108	2.3	124	2.6	167	3
Cla010036	375	8.8	524	11.1	1182	25.1	1306	23.7
Cla011906	33	0.8	36	0.8	67	1.4	56	1
Cla023401	230	5.4	315	6.7	154	3.3	239	4.3
Cla000028	0	0	0	0	0	0	0	0
Cla018463	255	6	283	6	118	2.5	167	3
Cla008519	0	0	0	0	0	0	0	0
Cla021203	0	0	0	0	0	0	8	0.1
Cla018519	26	0.6	39	0.8	12	0.3	14	0.3
Cla008980	7	0.2	9	0.2	9	0.2	13	0.2
Cla020253	223	5.2	266	5.6	146	3.1	310	5.6
Cla018762	200	4.7	228	4.8	141	3	178	3.2
Cla009867	121	2.8	110	2.3	163	3.5	178	3.2
Cla019770	131	3.1	177	3.7	31	0.7	64	1.2
Cla022641	8	0.2	5	0.1	1	0	0	0
Cla014764	877	20.6	935	19.8	805	17.1	3171	57.5
Cla013670	141	3.3	176	3.7	134	2.8	187	3.4
Cla016734	17	0.4	24	0.5	27	0.6	22	0.4
Cla005497	12	0.3	12	0.3	14	0.3	28	0.5
Cla012336	21	0.5	14	0.3	14	0.3	48	0.9
Cla015342	19	0.4	27	0.6	25	0.5	24	0.4
Cla010757	61	1.4	72	1.5	71	1.5	132	2.4
Cla019591	737	17.3	1109	23.4	421	8.9	609	11
Cla010137	192	4.5	163	3.4	157	3.3	233	4.2
Cla012296	585	13.7	907	19.2	1754	37.3	1001	18.2
Cla002968	602	14.1	583	12.3	212	4.5	495	9
Cla008582	296	7	394	8.3	488	10.4	436	7.9
Cla000390	127	3	235	5	164	3.5	397	7.2
Cla012942	1237	29.1	1177	24.9	780	16.6	522	9.5
Cla020320	165	3.9	219	4.6	301	6.4	221	4
Cla003188	77	1.8	1558	32.9	71	1.5	2969	53.9
Cla017221	55	1.3	90	1.9	76	1.6	117	2.1
Cla013208	261	6.1	380	8	276	5.9	491	8.9
Cla007439	2040	47.9	3124	66	1470	31.2	1478	26.8
Cla009047	9	0.2	10	0.2	15	0.3	24	0.4
Cla008431	1107	26	1119	23.6	1486	31.6	5331	96.7
Cla017621	971	22.8	1151	24.3	1119	23.8	1326	24.1
Cla003409	0	0	1	0	0	0	2	0
Cla021799	3	0.1	14	0.3	28	0.6	180	3.3
Cla004777	541	12.7	824	17.4	568	12.1	980	17.8
Cla018947	165	3.9	255	5.4	320	6.8	216	3.9
Cla013081	28	0.7	40	0.8	53	1.1	75	1.4
Cla000516	944	22.2	1069	22.6	955	20.3	2129	38.6
Cla007182	0	0	0	0	0	0	0	0
Cla002357	13	0.3	12	0.3	6	0.1	2	0
Cla021944	210	4.9	286	6	265	5.6	341	6.2
Cla005213	0	0	0	0	0	0	0	0
Cla020906	70	1.6	72	1.5	86	1.8	164	3
Cla007885	1	0	0	0	0	0	0	0
Cla008248	8	0.2	11	0.2	7	0.1	9	0.2
Cla009695	69	1.6	99	2.1	50	1.1	51	0.9
Cla018608	60	1.4	72	1.5	38	0.8	42	0.8
Cla006718	241	5.7	442	9.3	641	13.6	767	13.9
Cla016202	2	0	0	0	4	0.1	0	0
Cla001529	0	0	0	0	0	0	0	0
Cla013746	37	0.9	90	1.9	165	3.5	231	4.2
Cla004960	175	4.1	136	2.9	78	1.7	153	2.8
Cla002490	0	0	0	0	0	0	2	0
Cla000288	0	0	2	0	0	0	0	0
Cla005181	3	0.1	2	0	6	0.1	2	0
Cla009642	199	4.7	408	8.6	3965	84.3	1187	21.5
Cla019032	76	1.8	107	2.3	260	5.5	472	8.6
Cla004800	0	0	16	0.3	2	0	37	0.7
Cla011020	0	0	0	0	0	0	0	0
Cla011708	995	23.4	1590	33.6	637	13.5	796	14.4
Cla012065	1125	26.4	1084	22.9	1483	31.5	1022	18.5
Cla002477	0	0	0	0	1	0	1	0
Cla002463	0	0	0	0	0	0	1	0
Cla008033	64	1.5	75	1.6	131	2.8	176	3.2
Cla009688	95	2.2	79	1.7	75	1.6	196	3.6
Cla011055	0	0	0	0	0	0	0	0
Cla007478	38	0.9	69	1.5	62	1.3	76	1.4
Cla020096	908	21.3	1258	26.6	1346	28.6	2060	37.4
Cla005078	11	0.3	5	0.1	6	0.1	2	0
Cla009099	71	1.7	78	1.6	124	2.6	169	3.1
Cla010565	126	3	134	2.8	251	5.3	391	7.1
Cla020217	42	1	72	1.5	42	0.9	84	1.5
Cla018071	205	4.8	231	4.9	344	7.3	843	15.3
Cla004451	1492	35	3370	71.2	2868	60.9	6038	109.5
Cla007320	760	17.9	1058	22.3	759	16.1	793	14.4
Cla005800	112	2.6	144	3	121	2.6	215	3.9
Cla009476	0	0	0	0	0	0	0	0
Cla011364	1259	29.6	1423	30.1	2303	48.9	2777	50.4
Cla006218	17	0.4	14	0.3	17	0.4	34	0.6
Cla013327	2	0	2	0	1	0	0	0
Cla005470	11	0.3	20	0.4	41	0.9	36	0.7
Cla005851	430	10.1	530	11.2	440	9.3	543	9.9
Cla011622	226	5.3	390	8.2	406	8.6	640	11.6
Cla017070	4	0.1	2	0	0	0	0	0
Cla011969	0	0	0	0	2	0	4	0.1
Cla007383	148	3.5	173	3.7	168	3.6	565	10.2
Cla006401	0	0	0	0	0	0	0	0
Cla020836	268	6.3	577	12.2	508	10.8	316	5.7
Cla019515	0	0	0	0	0	0	0	0
Cla017455	614	14.4	843	17.8	548	11.6	774	14
Cla001184	3	0.1	0	0	0	0	3	0.1
Cla010605	0	0	0	0	2	0	0	0
Cla013236	325	7.6	604	12.8	586	12.5	618	11.2
Cla004358	10	0.2	80	1.7	234	5	614	11.1
Cla002184	374	8.8	442	9.3	351	7.5	516	9.4
Cla014486	104	2.4	92	1.9	51	1.1	59	1.1
Cla001589	0	0	0	0	0	0	0	0
Cla005729	0	0	0	0	0	0	0	0
Cla016368	934	21.9	1574	33.2	1123	23.9	2849	51.7
Cla004756	271	6.4	409	8.6	528	11.2	260	4.7
Cla015993	349	8.2	497	10.5	581	12.3	977	17.7
Cla022231	7	0.2	13	0.3	15	0.3	8	0.1
Cla005864	0	0	4	0.1	5	0.1	0	0
Cla015179	5	0.1	2	0	0	0	0	0
Cla014992	228	5.4	155	3.3	136	2.9	216	3.9
Cla009378	1899	44.6	660	13.9	1802	38.3	2015	36.6
Cla003843	0	0	1	0	0	0	0	0
Cla022669	462	10.9	465	9.8	766	16.3	1608	29.2
Cla003147	302	7.1	387	8.2	858	18.2	1047	19
Cla011944	0	0	0	0	0	0	0	0
Cla002288	0	0	3	0.1	0	0	10	0.2
Cla023350	174	4.1	325	6.9	387	8.2	364	6.6
Cla013056	14	0.3	26	0.5	26	0.6	47	0.9
Cla010053	196	4.6	198	4.2	74	1.6	138	2.5
Cla016314	21	0.5	31	0.7	27	0.6	31	0.6
Cla018259	393	9.2	616	13	763	16.2	1178	21.4
Cla006858	511	12	720	15.2	1144	24.3	1248	22.6
Cla003339	7364	173	8122	171.6	6463	137.3	464	8.4
Cla007970	0	0	0	0	0	0	1	0
Cla020202	33	0.8	46	1	15	0.3	37	0.7
Cla006637	56	1.3	2	0	744	15.8	1869	33.9
Cla012042	744	17.5	980	20.7	1757	37.3	2198	39.9
Cla006339	1	0	1	0	0	0	1	0
Cla016076	1314	30.9	1351	28.5	1520	32.3	1663	30.2
Cla002765	22	0.5	30	0.6	23	0.5	56	1
Cla008186	179	4.2	176	3.7	271	5.8	505	9.2
Cla010510	68	1.6	131	2.8	200	4.2	406	7.4
Cla012272	57	1.3	109	2.3	52	1.1	302	5.5
Cla023464	30342	712.7	33649	710.8	10895	231.5	4469	81.1
Cla001907	24	0.6	75	1.6	75	1.6	55	1
Cla003355	0	0	2	0	0	0	1	0
Cla003693	0	0	0	0	0	0	0	0
Cla012460	35	0.8	97	2	105	2.2	162	2.9
Cla001607	0	0	0	0	1	0	0	0
Cla013346	2836	66.6	3444	72.7	2987	63.5	1529	27.7
Cla003951	16	0.4	14	0.3	34	0.7	64	1.2
Cla008019	140	3.3	192	4.1	238	5.1	215	3.9
Cla003718	0	0	0	0	3	0.1	4	0.1
Cla012458	1223	28.7	920	19.4	2050	43.6	1992	36.1
Cla002751	1332	31.3	1632	34.5	384	8.2	177	3.2
Cla002275	46	1.1	25	0.5	37	0.8	85	1.5
Cla009103	429	10.1	431	9.1	371	7.9	335	6.1
Cla008335	1	0	1	0	0	0	1	0
Cla003477	1	0	1	0	14	0.3	22	0.4
Cla014464	31	0.7	213	4.5	41	0.9	223	4
Cla013129	0	0	0	0	0	0	0	0
Cla009957	31	0.7	23	0.5	12	0.3	8	0.1
Cla005257	0	0	0	0	0	0	8	0.1
Cla006942	858	20.2	1148	24.2	414	8.8	704	12.8
Cla007977	12	0.3	19	0.4	4	0.1	17	0.3
Cla017337	0	0	2	0	0	0	11	0.2
Cla005884	38	0.9	39	0.8	14	0.3	26	0.5
Cla009496	2	0	3	0.1	1	0	2	0
Cla007010	488	11.5	673	14.2	966	20.5	876	15.9
Cla020514	6	0.1	20	0.4	13	0.3	2	0
Cla018493	0	0	1	0	3	0.1	9	0.2
Cla003952	515	12.1	217	4.6	422	9	5968	108.3
Cla022685	266	6.2	316	6.7	332	7.1	598	10.8
Cla004652	63	1.5	17	0.4	0	0	3	0.1
Cla003285	487	11.4	413	8.7	287	6.1	1689	30.6
Cla014238	4	0.1	8	0.2	4	0.1	94	1.7
Cla014585	579	13.6	805	17	708	15	2570	46.6
Cla018967	0	0	0	0	1	0	0	0
Cla020940	837	19.7	1150	24.3	1396	29.7	2090	37.9
Cla005088	59	1.4	76	1.6	27	0.6	88	1.6
Cla008467	184	4.3	213	4.5	159	3.4	191	3.5
Cla007400	249	5.8	324	6.8	135	2.9	1340	24.3
Cla016560	52	1.2	82	1.7	113	2.4	121	2.2
Cla005885	0	0	0	0	0	0	2	0
Cla018188	0	0	4	0.1	0	0	2	0
Cla001300	396	9.3	558	11.8	613	13	539	9.8
Cla007587	4112	96.6	3707	78.3	2617	55.6	5055	91.7
Cla021316	298	7	339	7.2	97	2.1	295	5.4
Cla023182	102	2.4	546	11.5	6762	143.7	5019	91
Cla013231	0	0	2	0	0	0	0	0
Cla016085	156	3.7	261	5.5	350	7.4	896	16.3
Cla015059	1364	32	6088	128.6	4911	104.4	130	2.4
Cla017670	112	2.6	97	2	231	4.9	251	4.6
Cla020573	2219	52.1	2795	59	2401	51	23293	422.5
Cla018621	2	0	0	0	0	0	9	0.2
Cla020878	327	7.7	444	9.4	79	1.7	42	0.8
Cla000254	0	0	0	0	0	0	0	0
Cla007129	5	0.1	12	0.3	16	0.3	19	0.3
Cla022969	0	0	2	0	0	0	0	0
Cla003121	221	5.2	368	7.8	930	19.8	1167	21.2
Cla003489	3	0.1	0	0	2	0	5	0.1
Cla022835	285	6.7	189	4	71	1.5	668	12.1
Cla009769	228	5.4	269	5.7	391	8.3	710	12.9
Cla004453	0	0	0	0	0	0	0	0
Cla003806	672	15.8	804	17	662	14.1	886	16.1
Cla001592	0	0	1	0	1	0	1	0
Cla014183	101	2.4	98	2.1	175	3.7	55	1
Cla006106	141	3.3	127	2.7	202	4.3	188	3.4
Cla001539	0	0	0	0	0	0	0	0
Cla015868	14	0.3	2	0	10	0.2	6	0.1
Cla009935	8	0.2	57	1.2	103	2.2	159	2.9
Cla000733	4	0.1	6	0.1	5	0.1	6	0.1
Cla022561	0	0	0	0	0	0	0	0
Cla015164	13	0.3	9	0.2	33	0.7	25	0.5
Cla018921	1044	24.5	1200	25.3	920	19.5	1554	28.2
Cla006980	680	16	754	15.9	511	10.9	286	5.2
Cla000787	1	0	0	0	0	0	0	0
Cla010979	36	0.8	63	1.3	34	0.7	47	0.9
Cla004406	0	0	0	0	0	0	0	0
Cla008657	393	9.2	395	8.3	219	4.7	617	11.2
Cla020043	8	0.2	0	0	0	0	1	0
Cla008952	7	0.2	9	0.2	4	0.1	14	0.3
Cla022814	241	5.7	416	8.8	439	9.3	442	8
Cla020963	541	12.7	841	17.8	984	20.9	1947	35.3
Cla003126	34	0.8	48	1	40	0.8	40	0.7
Cla000820	74	1.7	67	1.4	96	2	220	4
Cla004821	288	6.8	354	7.5	471	10	723	13.1
Cla011121	50	1.2	40	0.8	57	1.2	38	0.7
Cla003564	556	13.1	961	20.3	557	11.8	426	7.7
Cla007139	1243	29.2	2117	44.7	712	15.1	738	13.4
Cla006885	335	7.9	644	13.6	672	14.3	734	13.3
Cla001795	2	0	3	0.1	2	0	5	0.1
Cla020353	1	0	0	0	0	0	0	0
Cla022770	0	0	0	0	0	0	0	0
Cla003480	0	0	1	0	3	0.1	1	0
Cla001735	12	0.3	20	0.4	17	0.4	20	0.4
Cla008369	36	0.8	35	0.7	50	1.1	69	1.3
Cla005514	823	19.3	1089	23	283	6	427	7.7
Cla017902	508	11.9	710	15	873	18.6	940	17.1
Cla021604	46	1.1	46	1	39	0.8	38	0.7
Cla004458	388	9.1	681	14.4	641	13.6	1024	18.6
Cla003661	0	0	0	0	0	0	0	0
Cla016646	116	2.7	260	5.5	545	11.6	1338	24.3
Cla006243	2	0	0	0	0	0	8	0.1
Cla008800	0	0	0	0	0	0	0	0
Cla014816	382	9	560	11.8	361	7.7	254	4.6
Cla002835	244	5.7	362	7.6	783	16.6	392	7.1
Cla019734	3	0.1	12	0.3	0	0	1	0
Cla013259	68	1.6	76	1.6	120	2.5	185	3.4
Cla014806	236	5.5	392	8.3	874	18.6	894	16.2
Cla000237	0	0	0	0	0	0	1	0
Cla006827	0	0	0	0	0	0	0	0
Cla004249	553	13	578	12.2	755	16	961	17.4
Cla001722	346	8.1	283	6	162	3.4	129	2.3
Cla018222	439	10.3	810	17.1	566	12	214	3.9
Cla008774	1982	46.6	2994	63.2	3604	76.6	5089	92.3
Cla012900	144	3.4	150	3.2	265	5.6	418	7.6
Cla003422	887	20.8	926	19.6	2287	48.6	9423	170.9
Cla022035	0	0	9	0.2	1	0	0	0
Cla006721	345	8.1	385	8.1	288	6.1	500	9.1
Cla004603	363	8.5	467	9.9	457	9.7	762	13.8
Cla022889	2665	62.6	2984	63	2480	52.7	1442	26.2
Cla007772	84	2	96	2	150	3.2	137	2.5
Cla013586	224	5.3	216	4.6	314	6.7	277	5
Cla001142	283	6.6	483	10.2	468	9.9	1002	18.2
Cla011251	185	4.3	265	5.6	344	7.3	65	1.2
Cla019128	162	3.8	158	3.3	196	4.2	234	4.2
Cla019388	2561	60.2	4923	104	8675	184.3	8309	150.7
Cla014121	131	3.1	273	5.8	192	4.1	222	4
Cla020630	191	4.5	305	6.4	194	4.1	322	5.8
Cla007352	145	3.4	179	3.8	229	4.9	249	4.5
Cla020814	94	2.2	146	3.1	305	6.5	237	4.3
Cla022388	33	0.8	47	1	42	0.9	53	1
Cla005437	431	10.1	315	6.7	474	10.1	679	12.3
Cla021811	3371	79.2	4398	92.9	3595	76.4	5146	93.3
Cla007624	11	0.3	9	0.2	1137	24.2	325	5.9
Cla001053	1	0	2	0	0	0	5	0.1
Cla007289	316	7.4	310	6.5	558	11.9	812	14.7
Cla021254	149	3.5	173	3.7	160	3.4	367	6.7
Cla003013	113	2.7	154	3.3	207	4.4	127	2.3
Cla016097	68	1.6	91	1.9	120	2.5	317	5.8
Cla003454	436	10.2	692	14.6	471	10	401	7.3
Cla002169	1	0	0	0	1	0	0	0
Cla004876	1310	30.8	1807	38.2	502	10.7	2613	47.4
Cla005654	95	2.2	159	3.4	86	1.8	45	0.8
Cla006926	163	3.8	280	5.9	483	10.3	1709	31
Cla001149	66	1.6	175	3.7	48	1	596	10.8
Cla017708	6	0.1	1	0	0	0	2	0
Cla019014	175	4.1	299	6.3	431	9.2	950	17.2
Cla000861	0	0	0	0	0	0	0	0
Cla006676	256	6	391	8.3	431	9.2	479	8.7
Cla017350	755	17.7	974	20.6	1128	24	2033	36.9
Cla000952	3	0.1	6	0.1	9	0.2	9	0.2
Cla015955	1261	29.6	1363	28.8	1660	35.3	2202	39.9
Cla019913	136	3.2	273	5.8	285	6.1	189	3.4
Cla020718	2	0	3	0.1	4	0.1	4	0.1
Cla019453	0	0	0	0	0	0	0	0
Cla004774	83	1.9	157	3.3	150	3.2	198	3.6
Cla002113	0	0	0	0	0	0	1	0
Cla003699	0	0	0	0	1	0	0	0
Cla010483	1512	35.5	1733	36.6	1980	42.1	2583	46.9
Cla013625	364	8.5	527	11.1	327	6.9	612	11.1
Cla007611	61	1.4	41	0.9	12	0.3	10	0.2
Cla015890	665	15.6	809	17.1	532	11.3	1013	18.4
Cla004610	0	0	0	0	0	0	0	0
Cla013931	12	0.3	18	0.4	7	0.1	19	0.3
Cla023255	122	2.9	121	2.6	141	3	236	4.3
Cla008995	181	4.3	193	4.1	323	6.9	416	7.5
Cla007707	176	4.1	410	8.7	2864	60.9	5364	97.3
Cla018515	759	17.8	796	16.8	1161	24.7	1919	34.8
Cla021831	727	17.1	518	10.9	1188	25.2	2097	38
Cla006211	2	0	2	0	1	0	124	2.2
Cla012330	0	0	0	0	0	0	0	0
Cla004233	173	4.1	205	4.3	218	4.6	343	6.2
Cla017383	143	3.4	274	5.8	148	3.1	120	2.2
Cla019944	22	0.5	14	0.3	34	0.7	64	1.2
Cla012366	0	0	0	0	0	0	0	0
Cla013768	420	9.9	551	11.6	812	17.3	852	15.5
Cla008807	295	6.9	357	7.5	621	13.2	740	13.4
Cla008906	279	6.6	534	11.3	208	4.4	541	9.8
Cla013204	302	7.1	306	6.5	343	7.3	9339	169.4
Cla009736	13	0.3	12	0.3	35	0.7	21	0.4
Cla002160	3	0.1	13	0.3	7	0.1	8	0.1
Cla018576	458	10.8	951	20.1	1068	22.7	3612	65.5
Cla008595	146	3.4	233	4.9	342	7.3	549	10
Cla023213	350	8.2	437	9.2	496	10.5	561	10.2
Cla017860	40	0.9	29	0.6	37	0.8	42	0.8
Cla014735	863	20.3	1123	23.7	591	12.6	1673	30.3
Cla001676	0	0	0	0	1	0	0	0
Cla014109	20	0.5	16	0.3	30	0.6	24	0.4
Cla000867	0	0	0	0	0	0	0	0
Cla009146	71	1.7	116	2.5	162	3.4	220	4
Cla016134	2	0	2	0	9	0.2	2	0
Cla010305	0	0	0	0	0	0	0	0
Cla016254	0	0	0	0	1	0	4	0.1
Cla002758	0	0	0	0	0	0	0	0
Cla001344	291	6.8	371	7.8	343	7.3	244	4.4
Cla015183	2	0	0	0	0	0	0	0
Cla000570	0	0	4	0.1	7	0.1	1	0
Cla015430	507	11.9	664	14	1013	21.5	1603	29.1
Cla021172	431	10.1	746	15.8	375	8	872	15.8
Cla015906	28	0.7	49	1	966	20.5	742	13.5
Cla014014	88	2.1	49	1	16	0.3	170	3.1
Cla009661	10	0.2	14	0.3	68	1.4	468	8.5
Cla008162	36	0.8	100	2.1	12	0.3	0	0
Cla010408	70	1.6	93	2	56	1.2	684	12.4
Cla004642	11	0.3	8	0.2	19	0.4	146	2.6
Cla018037	17	0.4	31	0.7	2	0	2	0
Cla009820	951	22.3	924	19.5	528	11.2	731	13.3
Cla022784	1706	40.1	1427	30.1	927	19.7	2047	37.1
Cla019784	0	0	0	0	0	0	3	0.1
Cla003710	446	10.5	545	11.5	429	9.1	594	10.8
Cla007186	946	22.2	1413	29.8	707	15	1852	33.6
Cla000165	11	0.3	6	0.1	6	0.1	7	0.1
Cla017878	1497	35.2	1996	42.2	1810	38.5	2970	53.9
Cla003321	28	0.7	22	0.5	19	0.4	8	0.1
Cla012469	58	1.4	70	1.5	123	2.6	132	2.4
Cla009401	249	5.8	316	6.7	257	5.5	958	17.4
Cla002153	0	0	0	0	0	0	0	0
Cla005665	837	19.7	817	17.3	333	7.1	468	8.5
Cla006358	117	2.7	198	4.2	122	2.6	225	4.1
Cla020535	7	0.2	23	0.5	7	0.1	50	0.9
Cla021482	1343	31.5	1147	24.2	1251	26.6	360	6.5
Cla018534	0	0	0	0	0	0	1	0
Cla017790	0	0	3	0.1	4	0.1	21	0.4
Cla013619	10	0.2	5	0.1	3	0.1	0	0
Cla023235	249	5.8	175	3.7	211	4.5	279	5.1
Cla016439	140	3.3	223	4.7	196	4.2	362	6.6
Cla015639	277	6.5	378	8	1030	21.9	798	14.5
Cla014436	116	2.7	170	3.6	169	3.6	269	4.9
Cla001069	8	0.2	3	0.1	3	0.1	65	1.2
Cla018297	1322	31.1	1421	30	1339	28.5	1051	19.1
Cla007166	4	0.1	4	0.1	3	0.1	7	0.1
Cla020680	741	17.4	793	16.8	877	18.6	3323	60.3
Cla010620	1	0	1	0	0	0	0	0
Cla005573	3	0.1	1	0	2	0	3	0.1
Cla000024	0	0	0	0	0	0	0	0
Cla005217	0	0	0	0	1	0	0	0
Cla015874	222	5.2	366	7.7	482	10.2	555	10.1
Cla005831	21	0.5	10	0.2	2	0	27	0.5
Cla001900	1699	39.9	2536	53.6	2509	53.3	3109	56.4
Cla019534	3	0.1	5	0.1	0	0	0	0
Cla010804	0	0	0	0	0	0	0	0
Cla013213	404	9.5	493	10.4	166	3.5	185	3.4
Cla016030	7	0.2	21	0.4	39	0.8	134	2.4
Cla022340	945	22.2	624	13.2	1015	21.6	1091	19.8
Cla001778	802	18.8	1469	31	9990	212.3	7355	133.4
Cla001563	0	0	0	0	0	0	0	0
Cla012535	449	10.5	799	16.9	623	13.2	1196	21.7
Cla022498	1280	30.1	657	13.9	943	20	966	17.5
Cla013254	8	0.2	2	0	5	0.1	22	0.4
Cla000160	0	0	0	0	2	0	0	0
Cla021150	0	0	0	0	0	0	0	0
Cla002535	0	0	0	0	0	0	0	0
Cla001505	1516	35.6	1155	24.4	269	5.7	552	10
Cla015772	0	0	25	0.5	42	0.9	1289	23.4
Cla012389	182	4.3	120	2.5	124	2.6	295	5.4
Cla005468	11	0.3	12	0.3	24	0.5	21	0.4
Cla009934	118	2.8	182	3.8	112	2.4	217	3.9
Cla017645	1	0	5	0.1	4	0.1	319	5.8
Cla004266	168	3.9	265	5.6	336	7.1	395	7.2
Cla017691	55	1.3	63	1.3	75	1.6	161	2.9
Cla007169	8	0.2	8	0.2	11	0.2	14	0.3
Cla013290	110	2.6	98	2.1	92	2	185	3.4
Cla002444	341	8	422	8.9	786	16.7	679	12.3
Cla017177	513	12	814	17.2	1123	23.9	2375	43.1
Cla002317	77	1.8	112	2.4	80	1.7	163	3
Cla011112	10	0.2	4	0.1	5	0.1	1	0
Cla000489	5	0.1	1	0	2	0	5	0.1
Cla001854	0	0	1	0	0	0	0	0
Cla000859	731	17.2	1348	28.5	1387	29.5	2138	38.8
Cla014400	1172	27.5	1854	39.2	1199	25.5	1018	18.5
Cla021660	22	0.5	19	0.4	89	1.9	696	12.6
Cla012355	2	0	7	0.1	1	0	9	0.2
Cla016487	332	7.8	385	8.1	615	13.1	682	12.4
Cla014807	424	10	500	10.6	635	13.5	622	11.3
Cla018436	249	5.8	327	6.9	382	8.1	817	14.8
Cla015827	89	2.1	73	1.5	133	2.8	128	2.3
Cla010486	271	6.4	344	7.3	1745	37.1	1244	22.6
Cla010154	30	0.7	16	0.3	83	1.8	63	1.1
Cla008299	90	2.1	112	2.4	121	2.6	261	4.7
Cla004868	32	0.8	34	0.7	31	0.7	54	1
Cla021781	903	21.2	1196	25.3	1334	28.3	1977	35.9
Cla016605	32	0.8	68	1.4	11	0.2	9	0.2
Cla013734	46	1.1	103	2.2	48	1	9	0.2
Cla012253	465	10.9	569	12	939	20	1729	31.4
Cla011106	1849	43.4	1792	37.9	29	0.6	2	0
Cla017287	756	17.8	970	20.5	452	9.6	166	3
Cla005709	0	0	5	0.1	0	0	3	0.1
Cla020618	336	7.9	604	12.8	734	15.6	1193	21.6
Cla019653	36	0.8	25	0.5	52	1.1	27	0.5
Cla022432	42	1	86	1.8	17	0.4	4	0.1
Cla018898	214	5	258	5.4	260	5.5	228	4.1
Cla012784	437	10.3	426	9	61	1.3	60	1.1
Cla014979	308	7.2	541	11.4	608	12.9	29	0.5
Cla008747	492	11.6	481	10.2	572	12.2	912	16.5
Cla017631	137	3.2	187	4	220	4.7	366	6.6
Cla019054	228	5.4	244	5.2	200	4.2	309	5.6
Cla016540	381	8.9	584	12.3	1429	30.4	4328	78.5
Cla019992	23	0.5	8	0.2	0	0	0	0
Cla015335	214	5	300	6.3	289	6.1	394	7.1
Cla017507	121	2.8	125	2.6	108	2.3	351	6.4
Cla012601	21	0.5	36	0.8	58	1.2	116	2.1
Cla016549	45	1.1	56	1.2	73	1.6	108	2
Cla018966	899	21.1	494	10.4	757	16.1	1068	19.4
Cla015373	54	1.3	73	1.5	255	5.4	223	4
Cla001760	0	0	0	0	2	0	0	0
Cla009078	462	10.9	524	11.1	480	10.2	391	7.1
Cla006080	364	8.5	475	10	1368	29.1	1537	27.9
Cla007953	2	0	1	0	3	0.1	5	0.1
Cla000102	3	0.1	1	0	2	0	13	0.2
Cla005231	259	6.1	327	6.9	471	10	661	12
Cla015362	0	0	0	0	0	0	2	0
Cla014663	4	0.1	7	0.1	4	0.1	2	0
Cla007194	0	0	0	0	0	0	10	0.2
Cla021051	814	19.1	1442	30.5	6693	142.2	7749	140.6
Cla015812	260	6.1	283	6	343	7.3	422	7.7
Cla013476	222	5.2	278	5.9	240	5.1	514	9.3
Cla021159	270	6.3	350	7.4	298	6.3	287	5.2
Cla014069	392	9.2	300	6.3	109	2.3	378	6.9
Cla020287	105	2.5	106	2.2	81	1.7	84	1.5
Cla018939	277	6.5	321	6.8	263	5.6	485	8.8
Cla003646	1	0	0	0	0	0	0	0
Cla011546	7	0.2	13	0.3	7	0.1	3	0.1
Cla015838	23	0.5	9	0.2	3	0.1	9	0.2
Cla015988	223	5.2	226	4.8	233	5	252	4.6
Cla003192	0	0	0	0	0	0	0	0
Cla010410	74	1.7	85	1.8	88	1.9	251	4.6
Cla003754	0	0	0	0	0	0	0	0
Cla013100	474	11.1	633	13.4	805	17.1	1068	19.4
Cla012133	789	18.5	1222	25.8	1091	23.2	1788	32.4
Cla015507	5	0.1	4	0.1	8	0.2	6	0.1
Cla017495	333	7.8	500	10.6	970	20.6	2177	39.5
Cla021816	745	17.5	1405	29.7	1571	33.4	3380	61.3
Cla018415	172	4	361	7.6	323	6.9	444	8.1
Cla013721	225	5.3	260	5.5	209	4.4	234	4.2
Cla008857	738	17.3	1029	21.7	1240	26.3	2240	40.6
Cla006641	1136	26.7	1967	41.5	529	11.2	904	16.4
Cla019279	344	8.1	371	7.8	214	4.5	182	3.3
Cla020487	693	16.3	905	19.1	556	11.8	590	10.7
Cla010962	165	3.9	224	4.7	528	11.2	651	11.8
Cla011707	8	0.2	4	0.1	11	0.2	17	0.3
Cla019272	408	9.6	860	18.2	3782	80.4	4086	74.1
Cla016000	70	1.6	112	2.4	138	2.9	221	4
Cla009628	327	7.7	384	8.1	44	0.9	167	3
Cla001353	8	0.2	7	0.1	13	0.3	33	0.6
Cla021179	126	3	197	4.2	104	2.2	104	1.9
Cla005741	17	0.4	13	0.3	5	0.1	190	3.4
Cla018962	3688	86.6	3156	66.7	2484	52.8	2782	50.5
Cla020550	218	5.1	301	6.4	567	12	1192	21.6
Cla008609	410	9.6	593	12.5	819	17.4	1474	26.7
Cla022303	1411	33.1	2449	51.7	3541	75.2	4513	81.9
Cla020259	0	0	0	0	0	0	0	0
Cla016212	1	0	4	0.1	3	0.1	7	0.1
Cla016275	0	0	2	0	2	0	15	0.3
Cla012930	66	1.6	83	1.8	84	1.8	130	2.4
Cla014653	0	0	0	0	0	0	0	0
Cla009969	606	14.2	890	18.8	741	15.7	4576	83
Cla009266	0	0	0	0	0	0	54	1
Cla019961	17	0.4	13	0.3	52	1.1	181	3.3
Cla004006	387	9.1	649	13.7	502	10.7	620	11.2
Cla018662	230	5.4	341	7.2	363	7.7	442	8
Cla019977	1755	41.2	2425	51.2	3976	84.5	8122	147.3
Cla000496	139	3.3	223	4.7	244	5.2	301	5.5
Cla022878	686	16.1	859	18.1	932	19.8	1454	26.4
Cla009667	70	1.6	82	1.7	63	1.3	301	5.5
Cla016693	217	5.1	359	7.6	300	6.4	317	5.8
Cla008571	13	0.3	30	0.6	34	0.7	27	0.5
Cla005226	0	0	0	0	0	0	6	0.1
Cla009167	907	21.3	866	18.3	620	13.2	180	3.3
Cla004197	57	1.3	99	2.1	35	0.7	37	0.7
Cla007003	4	0.1	10	0.2	21	0.4	0	0
Cla016463	401	9.4	741	15.7	837	17.8	1132	20.5
Cla002730	186	4.4	565	11.9	990	21	669	12.1
Cla003343	0	0	0	0	0	0	0	0
Cla014830	4	0.1	4	0.1	9	0.2	31	0.6
Cla010779	63	1.5	57	1.2	134	2.8	115	2.1
Cla019575	3	0.1	0	0	0	0	16	0.3
Cla018510	679	15.9	1017	21.5	959	20.4	1107	20.1
Cla013494	221	5.2	251	5.3	154	3.3	159	2.9
Cla012277	1261	29.6	1189	25.1	1523	32.4	2417	43.8
Cla005045	91	2.1	141	3	118	2.5	200	3.6
Cla015779	0	0	0	0	0	0	0	0
Cla003379	0	0	2	0	0	0	0	0
Cla007590	3278	77	4618	97.5	1437	30.5	1914	34.7
Cla000426	0	0	0	0	0	0	0	0
Cla022205	665	15.6	1091	23	1282	27.2	1802	32.7
Cla010230	18	0.4	38	0.8	54	1.1	51	0.9
Cla006160	5	0.1	4	0.1	2	0	3	0.1
Cla012826	258	6.1	174	3.7	9	0.2	16	0.3
Cla017534	0	0	0	0	0	0	0	0
Cla023140	1	0	0	0	0	0	3	0.1
Cla004443	60	1.4	34	0.7	68	1.4	68	1.2
Cla004432	183	4.3	258	5.4	162	3.4	517	9.4
Cla023486	27	0.6	7	0.1	2	0	0	0
Cla007606	0	0	0	0	0	0	1	0
Cla006032	230	5.4	397	8.4	262	5.6	374	6.8
Cla021297	810	19	931	19.7	1295	27.5	1619	29.4
Cla002026	2	0	0	0	6	0.1	2	0
Cla004556	360	8.5	465	9.8	364	7.7	322	5.8
Cla013111	199	4.7	271	5.7	395	8.4	758	13.8
Cla011677	0	0	1	0	0	0	0	0
Cla008342	416	9.8	675	14.3	513	10.9	762	13.8
Cla001012	69	1.6	117	2.5	150	3.2	176	3.2
Cla002625	158	3.7	218	4.6	291	6.2	778	14.1
Cla015030	5	0.1	18	0.4	17	0.4	3	0.1
Cla007958	9	0.2	1	0	7	0.1	8	0.1
Cla011796	0	0	0	0	0	0	0	0
Cla005142	1	0	1	0	0	0	0	0
Cla005372	2622	61.6	2974	62.8	3223	68.5	6899	125.1
Cla001754	852	20	929	19.6	378	8	290	5.3
Cla015369	3	0.1	1	0	0	0	0	0
Cla014887	42	1	47	1	40	0.8	53	1
Cla008259	0	0	0	0	0	0	0	0
Cla015381	18	0.4	13	0.3	53	1.1	59	1.1
Cla014202	134	3.1	154	3.3	333	7.1	358	6.5
Cla009216	1386	32.6	1912	40.4	3112	66.1	11258	204.2
Cla019350	0	0	0	0	0	0	10	0.2
Cla014165	1004	23.6	1395	29.5	356	7.6	87	1.6
Cla015104	156	3.7	237	5	162	3.4	364	6.6
Cla009771	41	1	31	0.7	14	0.3	114	2.1
Cla016007	607	14.3	1164	24.6	726	15.4	1557	28.2
Cla019516	447	10.5	776	16.4	112	2.4	26	0.5
Cla018254	9	0.2	16	0.3	7	0.1	6	0.1
Cla000464	168	3.9	289	6.1	59	1.3	256	4.6
Cla005600	447	10.5	866	18.3	1262	26.8	2230	40.5
Cla004273	123	2.9	190	4	173	3.7	207	3.8
Cla014695	10	0.2	21	0.4	6	0.1	26	0.5
Cla015632	26	0.6	87	1.8	309	6.6	666	12.1
Cla014640	0	0	1	0	0	0	0	0
Cla011749	490	11.5	629	13.3	463	9.8	680	12.3
Cla020675	599	14.1	572	12.1	916	19.5	3253	59
Cla002596	75	1.8	61	1.3	8	0.2	0	0
Cla014614	98	2.3	126	2.7	169	3.6	226	4.1
Cla003383	1	0	0	0	0	0	2	0
Cla000404	0	0	3	0.1	1	0	4	0.1
Cla003623	422	9.9	1055	22.3	862	18.3	1319	23.9
Cla010697	97	2.3	176	3.7	2218	47.1	2137	38.8
Cla004513	0	0	0	0	0	0	0	0
Cla003451	74	1.7	128	2.7	258	5.5	267	4.8
Cla007433	25	0.6	31	0.7	93	2	161	2.9
Cla001160	437	10.3	469	9.9	49	1	32	0.6
Cla020499	712	16.7	1381	29.2	3276	69.6	4318	78.3
Cla003634	186	4.4	301	6.4	136	2.9	283	5.1
Cla009623	11	0.3	6	0.1	1	0	0	0
Cla021912	83	1.9	86	1.8	60	1.3	219	4
Cla009058	11	0.3	44	0.9	21	0.4	150	2.7
Cla001311	0	0	6	0.1	2	0	3	0.1
Cla002242	102	2.4	183	3.9	284	6	858	15.6
[truncated: 21,442 more rows]

## Sheet: only pvalue
Sig	Feature ID	D2 vs D1 P-value	D3 vsD1 P-value	D4 vs D1 P-value	D1 - D1_RPM	D2 - D2_RPM	D3 - D3_RPM	D4 - D4_RPM	Annotation
Non_sig	Cla000001	0.969	0.97	0.969	1	1	1	1	Unknown
Non_sig	Cla000002	0.969	0.97	0.447	1	1	1	0.2	Retrotransposon
Non_sig	Cla000003	0.727	0.821	0.765	1.2	1.9	1.5	1.8	Mitochondrial
Non_sig	Cla000004	0.969	0.97	0.969	1	1	1	1	Predicted
Non_sig	Cla000005	0.969	0.97	0.969	1	1	1	1	ABA-inducible
Non_sig	Cla000006	0.969	0.97	0.969	1	1	1	1	Polygalacturonase
Non_sig	Cla000007	0.99	0.031	0.377	0.1	0.1	4.7	1.1	Heat
Non_sig	Cla000008	0.969	0.97	0.969	1	1	1	1	Sulfate
Non_sig	Cla000009	0.969	0.97	0.969	1	1	1	1	Unknown
Non_sig	Cla000010	0.969	0.97	0.969	1	1	1	1	Unknown
Non_sig	Cla000011	0.969	0.97	0.969	1	1	1	1	Cytochrome
Non_sig	Cla000012	0.969	0.97	0.969	1	1	1	1	Nitrate
Non_sig	Cla000013	0.847	0.68	0.914	1.2	1.6	0.6	1.1	Unknown
Non_sig	Cla000014	0.969	0.97	0.969	1	1	1	1	Membrane
Non_sig	Cla000015	0.375	0.97	0.969	1	0.1	1	1	Unknown
Non_sig	Cla000016	0.407	0.991	0.407	0.1	1	0.1	1	Unknown
Non_sig	Cla000017	0.969	0.97	0.969	1	1	1	1	Heparanase
Non_sig	Cla000018	0.969	0.97	0.969	1	1	1	1	Unknown
Non_sig	Cla000019	0.969	0.97	0.969	1	1	1	1	Unknown
Non_sig	Cla000020	0.969	0.97	0.969	1	1	1	1	Unknown
Non_sig	Cla000021	0.969	0.406	0.969	1	1	0.1	1	Pseudouridine
Non_sig	Cla000022	0.986	0.873	0.986	0.2	0.2	0.3	0.2	Unknown
Non_sig	Cla000023	0.969	0.97	0.969	1	1	1	1	Conserved
Non_sig	Cla000024	0.969	0.97	0.969	1	1	1	1	TIR-NBS
Non_sig	Cla000025	0.969	0.97	0.969	1	1	1	1	Unknown
Non_sig	Cla000026	0.969	0.97	0.969	1	1	1	1	Unknown
Non_sig	Cla000027	0.907	0.628	0.81	2.3	2.7	3.3	3	ABC-type
Non_sig	Cla000028	0.969	0.97	0.969	1	1	1	1	Unknown
Non_sig	Cla000029	0.969	0.97	0.969	1	1	1	1	PHD-finger
Non_sig	Cla000030	0.375	0.97	0.375	1	0.1	1	0.1	Unknown
Non_sig	Cla000031	0.969	0.97	0.969	1	1	1	1	Unknown
Non_sig	Cla000032	0.969	0.97	0.969	1	1	1	1	Beta-D-glucosidase
Non_sig	Cla000033	0.969	0.97	0.969	1	1	1	1	Pentatricopeptide
Non_sig	Cla000035	0.819	0.516	0.971	9.4	11	6.4	10.1	Unknown
Non_sig	Cla000037	0.969	0.97	0.969	1	1	1	1	11S
Non_sig	Cla000038	0.969	0.97	0.969	1	1	1	1	ATP-dependent
Non_sig	Cla000039	0.969	0.97	0.969	1	1	1	1	S-adenosylmethionine
Non_sig	Cla000040	0.969	0.97	0.969	1	1	1	1	class
Non_sig	Cla000041	0.969	0.97	0.969	1	1	1	1	Unknown
Non_sig	Cla000042	0.78	0.812	0.738	0.4	0.2	0.2	0.8	Copine-like
Non_sig	Cla000043	0.969	0.97	0.969	1	1	1	1	Nucleoporin
Non_sig	Cla000044	0.969	0.97	0.969	1	1	1	1	Unknown
Non_sig	Cla000045	0.969	0.97	0.969	1	1	1	1	Prolyl
Non_sig	Cla000046	0.972	0.653	0.613	0.8	0.8	0.3	0.3	Unknown
Non_sig	Cla000047	0.969	0.97	0.969	1	1	1	1	Unknown
Non_sig	Cla000048	0.969	0.97	0.969	1	1	1	1	Unknown
Non_sig	Cla000049	0.891	0.916	0.914	1.2	1.5	1.3	1.1	Serine-threonine
Non_sig	Cla000050	0.99	0.376	0.99	0.1	0.1	1	0.1	Unknown
Non_sig	Cla000051	0.691	0.695	0.285	1.2	2	1.8	3.7	Unknown
Non_sig	Cla000052	0.438	0.825	0.586	14.9	20.5	13	12.8	Pentatricopeptide
Non_sig	Cla000053	0.813	0.987	0.986	0.2	0.4	0.2	0.2	Unknown
Non_sig	Cla000054	0.969	0.97	0.969	1	1	1	1	Unknown
Non_sig	Cla000055	0.969	0.406	0.375	1	1	0.1	0.1	Unknown
Non_sig	Cla000056	0.969	0.97	0.969	1	1	1	1	Acyl-CoA
Non_sig	Cla000057	0.447	0.634	0.518	1	0.2	0.4	0.3	F-box/LRR-repeat
Non_sig	Cla000058	0.902	0.739	0.902	0.7	0.9	1.1	0.9	Unknown
Non_sig	Cla000059	0.375	0.406	0.447	1	0.1	0.1	0.2	Unknown
Non_sig	Cla000060	0.969	0.97	0.589	1	1	1	0.4	Polygalacturonase
Non_sig	Cla000061	0.969	0.97	0.969	1	1	1	1	Unknown
Non_sig	Cla000062	0.969	0.97	0.969	1	1	1	1	Unknown
Non_sig	Cla000063	0.969	0.97	0.969	1	1	1	1	Unknown
Non_sig	Cla000064	0.99	0.991	0.99	0.1	0.1	0.1	0.1	Unknown
Non_sig	Cla000065	0.969	0.406	0.969	1	1	0.1	1	Unknown
Non_sig	Cla000066	0.969	0.97	0.969	1	1	1	1	Unknown
Non_sig	Cla000067	0.969	0.97	0.969	1	1	1	1	Unknown
Non_sig	Cla000068	0.969	0.97	0.969	1	1	1	1	Unknown
Non_sig	Cla000069	0.969	0.97	0.969	1	1	1	1	Unknown
Non_sig	Cla000070	0.947	0.936	0.895	0.5	0.6	0.4	0.4	Unknown
Non_sig	Cla000071	0.969	0.97	0.969	1	1	1	1	Unknown
Non_sig	Cla000072	0.99	0.991	0.867	0.1	0.1	0.1	0.2	Unknown
Non_sig	Cla000073	0.969	0.97	0.969	1	1	1	1	Unknown
Non_sig	Cla000074	0.969	0.97	0.375	1	1	1	0.1	Unknown
Non_sig	Cla000075	0.022	0.089	0.488	9.8	24.1	3.3	7.4	Receptor
Non_sig	Cla000076	0.903	0.866	0.986	0.2	0.3	0.1	0.2	Unknown
Non_sig	Cla000077	0.407	0.991	0.99	0.1	1	0.1	0.1	Unknown
Non_sig	Cla000078	0.969	0.97	0.969	1	1	1	1	Unknown
Non_sig	Cla000079	0.969	0.97	0.969	1	1	1	1	Truncated
Non_sig	Cla000080	0.969	0.97	0.969	1	1	1	1	Unknown
Non_sig	Cla000081	0.969	0.97	0.969	1	1	1	1	Unknown
Non_sig	Cla000082	0.969	0.97	0.969	1	1	1	1	Unknown
Non_sig	Cla000083	0.969	0.97	0.969	1	1	1	1	Unknown
Non_sig	Cla000084	0.407	0.376	0.407	0.1	1	1	1	Unknown
Non_sig	Cla000085	0.969	0.97	0.969	1	1	1	1	Unknown
Non_sig	Cla000086	0.969	0.97	0.969	1	1	1	1	Unknown
Non_sig	Cla000087	0.969	0.97	0.969	1	1	1	1	Unknown
Non_sig	Cla000088	0.407	0.991	0.99	0.1	1	0.1	0.1	Unknown
Non_sig	Cla000089	0.969	0.97	0.969	1	1	1	1	Unknown
Non_sig	Cla000090	0.969	0.97	0.969	1	1	1	1	Unknown
Non_sig	Cla000091	0.969	0.97	0.969	1	1	1	1	Dof
Non_sig	Cla000092	0.969	0.97	0.969	1	1	1	1	Unknown
Non_sig	Cla000093	0.969	0.97	0.969	1	1	1	1	Unknown
Non_sig	Cla000094	0.969	0.97	0.969	1	1	1	1	Unknown
Non_sig	Cla000095	0.375	0.97	0.969	1	0.1	1	1	Unknown
Non_sig	Cla000096	0.447	0.97	0.969	1	0.2	1	1	Ankyrin
Non_sig	Cla000097	0.867	0.376	0.407	0.1	0.2	1	1	Ankyrin
Non_sig	Cla000098	0.969	0.97	0.969	1	1	1	1	Unknown
Non_sig	Cla000099	0.969	0.97	0.969	1	1	1	1	Unknown
Non_sig	Cla000100	0.969	0.97	0.969	1	1	1	1	Unknown
Non_sig	Cla000101	0.969	0.97	0.969	1	1	1	1	Unknown
Non_sig	Cla000102	0.407	0.376	0.867	0.1	1	1	0.2	Cytochrome
Non_sig	Cla000103	0.407	0.376	0.99	0.1	1	1	0.1	Unknown
Non_sig	Cla000104	0.969	0.97	0.969	1	1	1	1	Unknown
Non_sig	Cla000105	0.969	0.97	0.969	1	1	1	1	Unknown
Non_sig	Cla000106	0.969	0.97	0.969	1	1	1	1	Unknown
Non_sig	Cla000107	0.375	0.97	0.375	1	0.1	1	0.1	Unknown
Non_sig	Cla000108	0.99	0.376	0.407	0.1	0.1	1	1	Unknown
Non_sig	Cla000109	0.969	0.97	0.969	1	1	1	1	Unknown
Non_sig	Cla000110	0.504	0.832	0.322	0.5	1.5	0.7	2.2	Unknown
Non_sig	Cla000111	0.765	0.658	0.99	0.1	0.3	0.4	0.1	Homeobox-leucine
Non_sig	Cla000112	0.969	0.97	0.969	1	1	1	1	Unknown
Non_sig	Cla000113	0.969	0.97	0.969	1	1	1	1	Unknown
Non_sig	Cla000114	0.969	0.97	0.375	1	1	1	0.1	Unknown
Non_sig	Cla000115	0.375	0.97	0.969	1	0.1	1	1	Unknown
Non_sig	Cla000116	0.375	0.406	0.375	1	0.1	0.1	0.1	Unknown
Non_sig	Cla000117	0.969	0.97	0.969	1	1	1	1	Unknown
Non_sig	Cla000118	0.969	0.97	0.969	1	1	1	1	Unknown
Non_sig	Cla000119	0.969	0.97	0.969	1	1	1	1	Unknown
Non_sig	Cla000120	0.375	0.406	0.447	1	0.1	0.1	0.2	Unknown
Non_sig	Cla000121	0.768	0.823	0.698	2.6	3.5	2	1.9	BHLH
Non_sig	Cla000122	0.969	0.97	0.969	1	1	1	1	Unknown
Non_sig	Cla000123	0.447	0.406	0.969	1	0.2	0.1	1	Unknown
Non_sig	Cla000124	0.969	0.97	0.969	1	1	1	1	Unknown
Non_sig	Cla000125	0.969	0.97	0.969	1	1	1	1	Unknown
Non_sig	Cla000126	0.969	0.97	0.969	1	1	1	1	Unknown
Non_sig	Cla000127	0.969	0.97	0.969	1	1	1	1	Unknown
Non_sig	Cla000128	0.675	0.799	0.474	0.8	1.5	1.1	2.1	SET
Non_sig	Cla000129	0.973	0.346	0.835	28.4	30.3	34.2	28.4	Thioredoxin
Non_sig	Cla000130	0.407	0.376	0.99	0.1	1	1	0.1	Unknown
Non_sig	Cla000131	0.969	0.97	0.969	1	1	1	1	Hydrolase
Non_sig	Cla000132	0.969	0.97	0.969	1	1	1	1	Unknown
Non_sig	Cla000133	0.969	0.97	0.969	1	1	1	1	Unknown
Non_sig	Cla000134	0.726	0.043	0.011	6.9	6	1	0.3	COSII_At1g13380
Non_sig	Cla000135	0.969	0.97	0.969	1	1	1	1	Unknown
Non_sig	Cla000136	0.969	0.97	0.969	1	1	1	1	Unknown
Non_sig	Cla000137	0.969	0.97	0.969	1	1	1	1	Unknown
Non_sig	Cla000138	0.969	0.97	0.969	1	1	1	1	Unknown
Non_sig	Cla000139	0.969	0.97	0.969	1	1	1	1	Unknown
Non_sig	Cla000140	0.447	0.406	0.447	1	0.2	0.1	0.2	Unknown
Non_sig	Cla000141	0.969	0.97	0.969	1	1	1	1	Zinc
Non_sig	Cla000143	0.986	0.987	0.986	0.2	0.2	0.2	0.2	Unknown
Non_sig	Cla000145	0.969	0.97	0.969	1	1	1	1	Unknown
Non_sig	Cla000146	0.969	0.97	0.969	1	1	1	1	Unknown
Non_sig	Cla000147	0.969	0.406	0.969	1	1	0.1	1	Unknown
Non_sig	Cla000148	0.969	0.97	0.969	1	1	1	1	Unknown
Non_sig	Cla000149	0.969	0.97	0.969	1	1	1	1	Unknown
Non_sig	Cla000150	0.969	0.97	0.969	1	1	1	1	Beta-galactosidase
Non_sig	Cla000151	0.375	0.97	0.969	1	0.1	1	1	Unknown
Non_sig	Cla000153	0.969	0.97	0.969	1	1	1	1	Ty3-gypsy
Non_sig	Cla000154	0.969	0.97	0.969	1	1	1	1	Unknown
Non_sig	Cla000155	0.969	0.97	0.375	1	1	1	0.1	Unknown
Non_sig	Cla000156	0.99	0.844	0.99	0.1	0.1	0.2	0.1	Unknown
Non_sig	Cla000157	0.841	0.484	0.756	2.4	2.1	4	3.3	Ribosomal
Non_sig	Cla000158	0.843	0.866	0.903	0.2	0.1	0.1	0.3	Unknown
Non_sig	Cla000159	0.915	0.217	0.61	2.4	2.3	0.3	1.5	Camphor
Non_sig	Cla000160	0.969	0.97	0.969	1	1	1	1	Unknown
Non_sig	Cla000161	0.969	0.97	0.375	1	1	1	0.1	Unknown
Non_sig	Cla000163	0.99	0.082	0.363	2.2	2.3	7.3	4.8	Peptidyl-prolyl
Non_sig	Cla000164	0.969	0.97	0.969	1	1	1	1	Unknown
Non_sig	Cla000165	0.738	0.764	0.739	0.3	0.1	0.1	0.1	Unknown
Non_sig	Cla000166	0.969	0.97	0.969	1	1	1	1	Unknown
Non_sig	Cla000167	0.99	0.844	0.867	0.1	0.1	0.2	0.2	Unknown
Non_sig	Cla000168	0.969	0.97	0.969	1	1	1	1	Unknown
Non_sig	Cla000169	0.969	0.97	0.969	1	1	1	1	Unknown
Non_sig	Cla000170	0.375	0.559	0.375	1	0.1	0.3	0.1	Unknown
Non_sig	Cla000171	0.969	0.97	0.969	1	1	1	1	Unknown
Non_sig	Cla000172	0.872	0.902	0.872	0.3	0.2	0.2	0.2	Unknown
Non_sig	Cla000173	0.969	0.97	0.969	1	1	1	1	Unknown
Non_sig	Cla000174	0.969	0.97	0.969	1	1	1	1	Unknown
Non_sig	Cla000175	0.969	0.97	0.969	1	1	1	1	Unknown
Non_sig	Cla000176	0.969	0.97	0.969	1	1	1	1	Unknown
Non_sig	Cla000177	0.375	0.406	0.589	1	0.1	0.1	0.4	Unknown
Non_sig	Cla000178	0.994	0.758	0.713	16.4	17.3	17.3	19.6	Nuclear
Non_sig	Cla000179	0.375	0.97	0.375	1	0.1	1	0.1	Unknown
Non_sig	Cla000180	0.447	0.406	0.375	1	0.2	0.1	0.1	Unknown
Non_sig	Cla000181	0.504	0.549	0.38	1.2	0.4	0.4	0.2	Zinc
Non_sig	Cla000182	0.969	0.97	0.969	1	1	1	1	Unknown
Non_sig	Cla000183	0.969	0.97	0.969	1	1	1	1	Unknown
Non_sig	Cla000184	0.99	0.376	0.407	0.1	0.1	1	1	Unknown
Non_sig	Cla000185	0.969	0.97	0.969	1	1	1	1	Unknown
Non_sig	Cla000186	0.969	0.97	0.969	1	1	1	1	Unknown
Non_sig	Cla000187	0.969	0.97	0.969	1	1	1	1	Unknown
Non_sig	Cla000188	0.969	0.97	0.969	1	1	1	1	Unknown
Non_sig	Cla000189	0.969	0.97	0.969	1	1	1	1	Unknown
Non_sig	Cla000190	0.99	0.991	0.407	0.1	0.1	0.1	1	Unknown
Non_sig	Cla000191	0.969	0.97	0.969	1	1	1	1	Unknown
Non_sig	Cla000192	0.969	0.97	0.969	1	1	1	1	Unknown
Non_sig	Cla000193	0.969	0.97	0.969	1	1	1	1	Unknown
Non_sig	Cla000194	0.72	0.33	0.221	3.2	4.4	5.9	7.5	Hypothetical
Non_sig	Cla000195	0.969	0.97	0.969	1	1	1	1	Unknown
Non_sig	Cla000196	0.99	0.991	0.867	0.1	0.1	0.1	0.2	Unknown
Non_sig	Cla000197	0.78	0.812	0.657	0.4	0.2	0.2	0.1	Unknown
Non_sig	Cla000198	0.818	0.314	0.851	9.3	10.9	13.5	9	Homeobox-leucine
Non_sig	Cla000199	0.936	0.995	0.163	4.2	4.2	4	9.8	Transcriptional
Non_sig	Cla000200	0.84	0.476	0.675	0.8	0.6	1.9	1.5	Pentatricopeptide
Non_sig	Cla000201	0.969	0.97	0.969	1	1	1	1	Unknown
Non_sig	Cla000202	0.969	0.97	0.969	1	1	1	1	Unknown
Non_sig	Cla000203	0.375	0.97	0.969	1	0.1	1	1	Unknown
Non_sig	Cla000204	0.447	0.406	0.447	1	0.2	0.1	0.2	Unknown
Non_sig	Cla000205	0.988	0.319	0.282	4.3	4.5	7.4	8.5	Calcium-dependent
Non_sig	Cla000206	0.99	0.991	0.565	0.1	0.1	0.1	0.6	Isocitrate
Non_sig	Cla000207	0.969	0.97	0.969	1	1	1	1	Unknown
Non_sig	Cla000208	0.969	0.97	0.969	1	1	1	1	Major
Non_sig	Cla000209	0.969	0.97	0.969	1	1	1	1	Unknown
Non_sig	Cla000210	0.375	0.97	0.969	1	0.1	1	1	Unknown
Non_sig	Cla000211	0.969	0.97	0.969	1	1	1	1	Unknown
Non_sig	Cla000212	0.969	0.97	0.969	1	1	1	1	Unknown
Non_sig	Cla000213	0.407	0.844	0.99	0.1	1	0.2	0.1	Unknown
Non_sig	Cla000215	0.969	0.97	0.969	1	1	1	1	Unknown
Non_sig	Cla000217	0.969	0.97	0.969	1	1	1	1	Unknown
Non_sig	Cla000218	0.506	0.812	0.703	1	2.3	1.3	1.7	Helix-loop-helix
Non_sig	Cla000219	0.879	0.456	0.504	0.5	0.7	1.5	1.5	Unknown
Non_sig	Cla000220	0.969	0.97	0.969	1	1	1	1	Unknown
Non_sig	Cla000221	0.969	0.97	0.969	1	1	1	1	Unknown
Non_sig	Cla000222	0.986	0.866	0.843	0.2	0.2	0.1	0.1	Unknown
Non_sig	Cla000223	0.234	0.497	0.969	15.4	10.1	11.2	16.5	Major
Non_sig	Cla000224	0.886	0.685	0.887	0.4	0.3	0.1	0.3	Cytochrome
Non_sig	Cla000225	0.752	0.616	0.846	0.7	0.4	0.2	1	Cytochrome
Non_sig	Cla000226	0.886	0.896	0.887	0.4	0.3	0.5	0.3	Cytochrome
Non_sig	Cla000228	0.972	0.89	0.768	0.8	0.8	0.6	0.5	Cytochrome
Non_sig	Cla000229	0.969	0.97	0.969	1	1	1	1	Unknown
Non_sig	Cla000230	0.886	0.59	0.657	0.4	0.3	1	0.1	Cytochrome
Non_sig	Cla000231	0.969	0.97	0.969	1	1	1	1	Unknown
Non_sig	Cla000232	0.969	0.97	0.969	1	1	1	1	Unknown
Non_sig	Cla000233	0.969	0.97	0.969	1	1	1	1	Unknown
Non_sig	Cla000234	0.969	0.97	0.969	1	1	1	1	Cytochrome
Non_sig	Cla000236	0.968	0.89	0.908	0.8	0.9	0.6	0.7	Unknown
Non_sig	Cla000237	0.969	0.97	0.969	1	1	1	1	Unknown
Non_sig	Cla000238	0.969	0.97	0.969	1	1	1	1	Unknown
Non_sig	Cla000239	0.969	0.97	0.969	1	1	1	1	Unknown
Non_sig	Cla000240	0.799	0.781	0.701	4.3	3.8	4.9	5.8	Internalin
Non_sig	Cla000241	0.969	0.97	0.969	1	1	1	1	Unknown
Non_sig	Cla000242	0.969	0.97	0.969	1	1	1	1	Unknown
Non_sig	Cla000243	0.969	0.97	0.969	1	1	1	1	Unknown
Non_sig	Cla000244	0.903	0.866	0.986	0.2	0.3	0.1	0.2	Unknown
Non_sig	Cla000245	0.969	0.97	0.969	1	1	1	1	Unknown
Non_sig	Cla000246	0.969	0.97	0.969	1	1	1	1	Unknown
Non_sig	Cla000247	0.774	0.439	0.651	0.9	1.4	0.1	1.7	Extradiol
Non_sig	Cla000248	0.969	0.97	0.969	1	1	1	1	Unknown
Non_sig	Cla000249	0.969	0.97	0.969	1	1	1	1	Unknown
Non_sig	Cla000250	0.969	0.97	0.969	1	1	1	1	Unknown
Non_sig	Cla000251	0.969	0.97	0.969	1	1	1	1	Unknown
Non_sig	Cla000252	0.969	0.97	0.969	1	1	1	1	Unknown
Non_sig	Cla000253	0.969	0.97	0.969	1	1	1	1	Unknown
Non_sig	Cla000254	0.969	0.97	0.969	1	1	1	1	Sucrose
Non_sig	Cla000255	0.969	0.97	0.969	1	1	1	1	Unknown
Non_sig	Cla000256	0.138	0.21	0.257	0.2	2.9	2	1.9	Unknown
Non_sig	Cla000257	0.969	0.97	0.969	1	1	1	1	Unknown
Non_sig	Cla000259	0.375	0.97	0.969	1	0.1	1	1	Gag/pol
Non_sig	Cla000260	0.969	0.97	0.375	1	1	1	0.1	Unknown
Non_sig	Cla000261	0.969	0.97	0.969	1	1	1	1	Unknown
Non_sig	Cla000262	0.407	0.376	0.99	0.1	1	1	0.1	Unknown
Non_sig	Cla000263	0.969	0.406	0.969	1	1	0.1	1	Membrane
Non_sig	Cla000264	0.952	0.119	0.254	3.9	4.3	9.2	8.2	Membrane
Non_sig	Cla000265	0.375	0.406	0.375	1	0.1	0.1	0.1	Membrane
Non_sig	Cla000266	0.832	0.734	0.754	6.5	6.1	7.4	8.1	Pentatricopeptide
Non_sig	Cla000267	0.911	0.701	0.807	0.8	1	1.3	1.2	Pentatricopeptide
Non_sig	Cla000268	0.969	0.97	0.969	1	1	1	1	Unknown
Non_sig	Cla000269	0.969	0.97	0.969	1	1	1	1	Unknown
Non_sig	Cla000270	0.985	0.417	0.562	1.2	1.3	2.7	2.4	Unknown
Non_sig	Cla000271	0.969	0.97	0.375	1	1	1	0.1	Unknown
Non_sig	Cla000272	0.969	0.97	0.969	1	1	1	1	Unknown
Non_sig	Cla000273	0.847	0.732	0.325	2.9	2.6	3.6	6.1	Unknown
Non_sig	Cla000274	0.965	0.763	0.503	10.3	11.1	8.5	14.3	Heat
Non_sig	Cla000275	0.969	0.97	0.969	1	1	1	1	Unknown
Non_sig	Cla000276	0.903	0.866	0.986	0.2	0.3	0.1	0.2	Unknown
Non_sig	Cla000277	0.969	0.97	0.969	1	1	1	1	Unknown
Non_sig	Cla000278	0.969	0.97	0.969	1	1	1	1	Unknown
Non_sig	Cla000279	0.969	0.97	0.969	1	1	1	1	Unknown
Non_sig	Cla000280	0.99	0.376	0.99	0.1	0.1	1	0.1	Unknown
Non_sig	Cla000281	0.694	0.48	0.188	8	6.9	5.1	3.8	Phytochrome
Non_sig	Cla000282	0.969	0.97	0.969	1	1	1	1	Unknown
Non_sig	Cla000283	0.969	0.97	0.969	1	1	1	1	Unknown
Non_sig	Cla000284	0.969	0.97	0.969	1	1	1	1	Unknown
Non_sig	Cla000285	0.969	0.97	0.969	1	1	1	1	Unknown
Non_sig	Cla000286	0.99	0.376	0.99	0.1	0.1	1	0.1	Unknown
Non_sig	Cla000288	0.969	0.97	0.969	1	1	1	1	Unknown
Non_sig	Cla000289	0.969	0.97	0.969	1	1	1	1	Unknown
Non_sig	Cla000290	0.654	0.733	0.983	0.3	0.8	0.6	0.3	Unknown
Non_sig	Cla000291	0.969	0.97	0.969	1	1	1	1	Unknown
Non_sig	Cla000293	0.375	0.406	0.969	1	0.1	0.1	1	Unknown
Non_sig	Cla000294	0.969	0.97	0.969	1	1	1	1	Unknown
Non_sig	Cla000295	0.969	0.97	0.969	1	1	1	1	Unknown
Non_sig	Cla000296	0.969	0.97	0.969	1	1	1	1	Unknown
Non_sig	Cla000297	0.867	0.991	0.99	0.1	0.2	0.1	0.1	Unknown
Non_sig	Cla000298	0.969	0.97	0.969	1	1	1	1	Unknown
Non_sig	Cla000299	0.969	0.97	0.969	1	1	1	1	Unknown
Non_sig	Cla000301	0.738	0.018	0.56	0.3	0.1	6.1	1	Unknown
Non_sig	Cla000302	0.992	0.447	0.932	8	8.5	10.8	8.1	Splicing
Non_sig	Cla000303	0.969	0.97	0.969	1	1	1	1	60s
Non_sig	Cla000304	0.371	0.031	0.095	25.6	20.8	11.5	16	Pseudo-response
Non_sig	Cla000305	0.667	0.794	0.913	1.6	2.6	1.1	1.9	NHL1
Non_sig	Cla000306	0.945	0.982	0.592	3	3	2.9	4.7	Unknown
Non_sig	Cla000308	0.693	0.637	0.406	1.9	2.9	2.8	4.1	NPL4
Non_sig	Cla000309	0.433	0.695	0.891	1.2	2.9	1.8	1.5	Peptidase
Non_sig	Cla000311	0.76	0.045	0.488	9.7	8.9	19.8	13.7	Mitochondrial
Non_sig	Cla000313	0.967	0.817	0.796	1.1	1.1	1.4	1.6	Unknown
Non_sig	Cla000314	0.969	0.97	0.969	1	1	1	1	Ty3-gypsy
Non_sig	Cla000315	0.518	0.622	0.321	20.4	26.1	22.5	28.7	Ankyrin
Non_sig	Cla000316	0.969	0.97	0.969	1	1	1	1	Unknown
Non_sig	Cla000317	0.969	0.97	0.969	1	1	1	1	Unknown
Non_sig	Cla000318	0.756	0.781	0.944	2.4	3.3	2.9	2.7	Unknown
Non_sig	Cla000319	0.916	0.896	0.996	1.6	1.5	1.3	1.7	Unknown
Non_sig	Cla000320	0.969	0.406	0.969	1	1	0.1	1	MYB
Non_sig	Cla000321	0.969	0.97	0.969	1	1	1	1	Unknown
Non_sig	Cla000322	0.969	0.97	0.969	1	1	1	1	Unknown
Non_sig	Cla000323	0.871	0.538	0.959	1.7	1.5	2.9	1.7	At4g40080-like
Non_sig	Cla000324	0.969	0.97	0.969	1	1	1	1	Unknown
Non_sig	Cla000325	0.964	0.637	0.393	4.1	4.2	5.3	7.3	Riboflavin
Non_sig	Cla000326	0.969	0.97	0.969	1	1	1	1	Unknown
Non_sig	Cla000327	0.969	0.97	0.969	1	1	1	1	Unknown
Non_sig	Cla000328	0.969	0.97	0.969	1	1	1	1	Unknown
Non_sig	Cla000330	0.762	0.882	0.581	2.5	3.4	2.7	4.1	Calcium-dependent
Non_sig	Cla000331	0.901	0.604	0.614	3	3.5	4.2	4.6	Ell-associated
Non_sig	Cla000332	0.983	0.764	0.739	0.3	0.3	0.1	0.1	Unknown
Non_sig	Cla000333	0.761	0.547	0.75	2.3	1.8	1.1	3.2	Acyl
Non_sig	Cla000334	0.969	0.97	0.969	1	1	1	1	Unknown
Non_sig	Cla000335	0.986	0.873	0.986	0.2	0.2	0.3	0.2	Unknown
Non_sig	Cla000336	0.969	0.97	0.969	1	1	1	1	Unknown
Non_sig	Cla000337	0.969	0.97	0.969	1	1	1	1	Self-incompatibility
Non_sig	Cla000338	0.969	0.406	0.375	1	1	0.1	0.1	Cysteine
Non_sig	Cla000339	0.969	0.97	0.969	1	1	1	1	Unknown
Non_sig	Cla000340	0.851	0.854	0.626	3.2	3.9	3.5	4.8	mRNA
Non_sig	Cla000341	0.457	0.235	0.271	1.2	2.8	3.7	3.8	Chaperone
Non_sig	Cla000342	0.64	0.993	0.387	2.3	3.6	2.2	4.8	Beta-1,3-galactosyl-O-glycosyl-glycoprotein
Non_sig	Cla000343	0.986	0.873	0.986	0.2	0.2	0.3	0.2	Unknown
Non_sig	Cla000344	0.969	0.406	0.375	1	1	0.1	0.1	Unknown
Non_sig	Cla000345	0.969	0.97	0.969	1	1	1	1	Unknown
Non_sig	Cla000346	0.801	0.109	0.094	3.3	4.2	8.5	9.7	Lecithin
Non_sig	Cla000347	0.962	0.796	0.974	0.7	0.8	0.4	0.7	Unknown
Non_sig	Cla000348	0.485	0.075	0.084	3.5	5.9	9.6	10.3	Lecithin
Non_sig	Cla000349	0.969	0.97	0.969	1	1	1	1	Unknown
Non_sig	Cla000350	0.969	0.97	0.969	1	1	1	1	Unknown
Non_sig	Cla000351	0.969	0.97	0.969	1	1	1	1	Unknown
Non_sig	Cla000352	0.886	0.685	0.98	0.4	0.3	0.1	0.4	Unknown
Non_sig	Cla000353	0.969	0.97	0.969	1	1	1	1	Unknown
Non_sig	Cla000354	0.949	0.093	0.827	18.9	20.4	29.3	21.4	Peptide
Non_sig	Cla000355	0.969	0.97	0.969	1	1	1	1	Unknown
Non_sig	Cla000356	0.969	0.97	0.969	1	1	1	1	Unknown
Non_sig	Cla000357	0.969	0.97	0.375	1	1	1	0.1	Unknown
Non_sig	Cla000358	0.969	0.97	0.969	1	1	1	1	Unknown
Non_sig	Cla000359	0.969	0.97	0.969	1	1	1	1	Sucrose
Non_sig	Cla000360	0.969	0.97	0.969	1	1	1	1	Unknown
Non_sig	Cla000361	0.407	0.991	0.407	0.1	1	0.1	1	Unknown
Non_sig	Cla000362	0.969	0.97	0.969	1	1	1	1	Unknown
Non_sig	Cla000363	0.969	0.97	0.969	1	1	1	1	Unknown
Non_sig	Cla000364	0.969	0.97	0.969	1	1	1	1	Unknown
Non_sig	Cla000365	0.969	0.97	0.969	1	1	1	1	Unknown
Non_sig	Cla000366	0.913	0.632	0.954	10.9	11	12.6	11.8	Acetolactate
Non_sig	Cla000367	0.375	0.483	0.589	1	0.1	0.2	0.4	Unknown
Non_sig	Cla000368	0.969	0.483	0.375	1	1	0.2	0.1	Unknown
Non_sig	Cla000369	0.447	0.406	0.375	1	0.2	0.1	0.1	Unknown
Non_sig	Cla000370	0.969	0.97	0.969	1	1	1	1	Unknown
Non_sig	Cla000371	0.395	0.717	0.886	14	19.9	11.5	15.6	Equilibrative
Non_sig	Cla000372	0.969	0.97	0.969	1	1	1	1	Unknown
Non_sig	Cla000373	0.969	0.406	0.79	1	1	0.1	0.7	Unknown
Non_sig	Cla000374	0.99	0.376	0.99	0.1	0.1	1	0.1	Carboxypeptidase
Non_sig	Cla000375	0.969	0.97	0.969	1	1	1	1	Unknown
Non_sig	Cla000376	0.735	0.947	0.926	5.6	4.8	5.1	5.6	Unknown
Non_sig	Cla000377	0.969	0.97	0.969	1	1	1	1	Unknown
Non_sig	Cla000378	0.779	0.946	0.637	0.6	1	0.5	0.2	NAC
Non_sig	Cla000379	0.969	0.97	0.969	1	1	1	1	Unknown
Non_sig	Cla000380	0.375	0.406	0.375	1	0.1	0.1	0.1	Unknown
Non_sig	Cla000381	0.99	0.991	0.867	0.1	0.1	0.1	0.2	Unknown
Non_sig	Cla000382	0.835	0.236	0.375	2.8	3.5	6.1	5.6	COP9
Non_sig	Cla000383	0.909	0.325	0.092	5.3	6	8.6	13	BZIP
Non_sig	Cla000385	0.872	0.887	0.709	0.3	0.2	0.4	0.7	Ribosome
Non_sig	Cla000386	0.941	0.812	0.916	2.3	2.6	2.7	2.2	AAA
Non_sig	Cla000387	0.647	0.263	0.647	2.4	3.7	5.3	3.7	Asparagine
Non_sig	Cla000389	0.661	0.399	0.42	3	4.4	5.2	5.6	Pentatricopeptide
Non_sig	Cla000390	0.53	0.792	0.22	3	5	3.5	7.2	Ureide
Non_sig	Cla000391	0.577	0.238	0.1	3.1	4.9	0.7	0.2	Ureide
Non_sig	Cla000392	0.969	0.97	0.969	1	1	1	1	Unknown
Non_sig	Cla000393	0.494	0.093	0.011	9	12.8	2.9	1.2	Glucan
Non_sig	Cla000394	0.463	0.467	0.142	2.1	4.1	3.7	6.7	Phosphate
Non_sig	Cla000395	0.831	0.69	0.618	0.7	0.5	1.2	1.5	Unknown
Non_sig	Cla000396	0.818	0.145	0.087	3.3	2.9	0.4	0.2	14-3-3-like
Non_sig	Cla000397	0.87	0.658	0.917	10.5	11.9	8.1	11.6	Dehydration-responsive
Non_sig	Cla000398	0.375	0.97	0.969	1	0.1	1	1	Unknown
Non_sig	Cla000399	0.969	0.97	0.969	1	1	1	1	Unknown
Non_sig	Cla000400	0.375	0.97	0.375	1	0.1	1	0.1	Unknown
Non_sig	Cla000401	0.969	0.97	0.969	1	1	1	1	Unknown
Non_sig	Cla000402	0.969	0.97	0.969	1	1	1	1	Unknown
Non_sig	Cla000403	0.375	0.97	0.969	1	0.1	1	1	Unknown
Non_sig	Cla000404	0.375	0.97	0.375	1	0.1	1	0.1	Unknown
Non_sig	Cla000405	0.99	0.991	0.99	0.1	0.1	0.1	0.1	Unknown
Non_sig	Cla000406	0.99	0.376	0.99	0.1	0.1	1	0.1	Unknown
Non_sig	Cla000407	0.969	0.97	0.969	1	1	1	1	Unknown
Non_sig	Cla000408	0.375	0.97	0.969	1	0.1	1	1	Unknown
Non_sig	Cla000409	0.969	0.97	0.969	1	1	1	1	Reductase
Non_sig	Cla000410	0.969	0.97	0.375	1	1	1	0.1	Unknown
Non_sig	Cla000411	0.969	0.97	0.969	1	1	1	1	Unknown
Non_sig	Cla000412	0.969	0.97	0.969	1	1	1	1	Unknown
Non_sig	Cla000413	0.969	0.97	0.969	1	1	1	1	Unknown
Non_sig	Cla000414	0.375	0.483	0.375	1	0.1	0.2	0.1	Unknown
Non_sig	Cla000415	0.969	0.97	0.969	1	1	1	1	Unknown
Non_sig	Cla000416	0.98	0.821	0.863	0.4	0.4	0.6	0.6	Unknown
Non_sig	Cla000417	0.969	0.97	0.785	1	1	1	1.5	Metallothionein-II
Non_sig	Cla000418	0.969	0.97	0.969	1	1	1	1	Unknown
Non_sig	Cla000419	0.969	0.97	0.969	1	1	1	1	Unknown
Non_sig	Cla000420	0.969	0.97	0.969	1	1	1	1	Polygalacturonase
Non_sig	Cla000421	0.969	0.97	0.969	1	1	1	1	Unknown
Non_sig	Cla000422	0.831	0.709	0.58	0.7	0.5	0.3	0.2	UDP-glycosyltransferase
Non_sig	Cla000423	0.969	0.97	0.969	1	1	1	1	Unknown
Non_sig	Cla000424	0.961	0.673	0.146	9	9.3	6.9	4.1	Chloroplast
Non_sig	Cla000425	0.969	0.97	0.969	1	1	1	1	Unknown
Non_sig	Cla000426	0.969	0.97	0.969	1	1	1	1	Unknown
Non_sig	Cla000427	0.969	0.97	0.969	1	1	1	1	Unknown
Non_sig	Cla000428	0.969	0.97	0.969	1	1	1	1	Gag/pol
Non_sig	Cla000429	0.792	0.31	0.152	3.7	4.7	6.7	9.2	Pyrimidine-specific
Non_sig	Cla000430	0.969	0.97	0.969	1	1	1	1	Unknown
Non_sig	Cla000431	0.99	0.991	0.99	0.1	0.1	0.1	0.1	Unknown
Non_sig	Cla000432	0.375	0.97	0.969	1	0.1	1	1	Unknown
Non_sig	Cla000433	0.804	0.841	0.978	0.5	0.3	0.3	0.5	Unknown
Non_sig	Cla000434	0.765	0.921	0.513	16.6	19.4	16.3	21.7	Histone-lysine
Non_sig	Cla000435	0.817	0.736	0.591	0.5	0.8	0.2	0.1	Unknown
Non_sig	Cla000436	0.969	0.97	0.969	1	1	1	1	Unknown
Non_sig	Cla000437	0.407	0.376	0.407	0.1	1	1	1	Unknown
Non_sig	Cla000438	0.969	0.97	0.969	1	1	1	1	Unknown
Non_sig	Cla000439	0.969	0.97	0.969	1	1	1	1	Unknown
Non_sig	Cla000440	0.969	0.97	0.969	1	1	1	1	Unknown
Non_sig	Cla000441	0.969	0.97	0.969	1	1	1	1	Unknown
Non_sig	Cla000442	0.969	0.97	0.969	1	1	1	1	Unknown
Non_sig	Cla000443	0.375	0.97	0.375	1	0.1	1	0.1	Vacuolar
Non_sig	Cla000444	0.969	0.97	0.969	1	1	1	1	Unknown
Non_sig	Cla000445	0.621	0.445	0.565	0.1	0.5	0.8	0.6	Unknown
Non_sig	Cla000446	0.969	0.97	0.969	1	1	1	1	Unknown
Non_sig	Cla000447	0.969	0.97	0.969	1	1	1	1	Unknown
Non_sig	Cla000448	0.969	0.97	0.969	1	1	1	1	Hydrolase
Non_sig	Cla000449	0.969	0.97	0.969	1	1	1	1	Unknown
Non_sig	Cla000450	0.969	0.97	0.969	1	1	1	1	Unknown
Non_sig	Cla000451	0.969	0.97	0.969	1	1	1	1	Unknown
Non_sig	Cla000452	0.765	0.991	0.99	0.1	0.3	0.1	0.1	Unknown
Non_sig	Cla000453	0.826	0.617	0.763	4.2	3.8	5.5	5.4	THO
Non_sig	Cla000454	0.686	0.739	0.686	0.1	0.4	0.3	0.4	Unknown
Non_sig	Cla000455	0.788	0.368	0.369	3.4	2.9	5.9	6.5	THO
Non_sig	Cla000456	0.99	0.376	0.407	0.1	0.1	1	1	Choline/ethanolamine
Non_sig	Cla000457	0.99	0.376	0.407	0.1	0.1	1	1	Gag
Non_sig	Cla000458	0.617	0.78	0.737	0.2	0.7	0.4	0.5	Unknown
Non_sig	Cla000459	0.969	0.97	0.969	1	1	1	1	Unknown
Non_sig	Cla000460	0.901	0.862	0.637	0.6	0.5	0.4	0.2	Unknown
Non_sig	Cla000461	0.752	0.848	0.974	0.7	0.4	0.9	0.7	DNA-directed
Non_sig	Cla000462	0.635	0.754	0.353	2.2	1.4	1.5	0.7	Germacrene-D
Non_sig	Cla000463	0.59	0.659	0.708	0.5	0.1	1	1	(-)-germacrene
Non_sig	Cla000464	0.543	0.28	0.873	3.9	6.1	1.3	4.6	Receptor-like
Non_sig	Cla000466	0.589	0.97	0.969	1	0.4	1	1	Dihydroflavonol-4-reductase
Non_sig	Cla000468	0.99	0.376	0.407	0.1	0.1	1	1	Unknown
Non_sig	Cla000469	0.969	0.97	0.969	1	1	1	1	DNA-damage-inducible
Non_sig	Cla000470	0.969	0.97	0.969	1	1	1	1	Unknown
Non_sig	Cla000471	0.969	0.97	0.969	1	1	1	1	Unknown
Non_sig	Cla000472	0.396	0.794	0.954	1.6	3.7	1.1	1.8	Nudix
Non_sig	Cla000473	0.969	0.97	0.969	1	1	1	1	Unknown
Non_sig	Cla000474	0.923	0.902	0.983	0.3	0.4	0.2	0.3	Unknown
Non_sig	Cla000475	0.969	0.97	0.969	1	1	1	1	Late
Non_sig	Cla000476	0.843	0.866	0.843	0.2	0.1	0.1	0.1	Unknown
Non_sig	Cla000477	0.969	0.97	0.375	1	1	1	0.1	Unknown
Non_sig	Cla000478	0.407	0.991	0.867	0.1	1	0.1	0.2	Elongation
Non_sig	Cla000479	0.678	0.102	0.383	11.3	14.1	4.4	8	Zinc
Non_sig	Cla000480	0.165	0.757	0.048	15.4	25.4	13	30	Dimethylaniline
Non_sig	Cla000481	0.447	0.018	0.218	3.7	6.4	12.9	8.3	Unknown
Non_sig	Cla000482	0.969	0.97	0.969	1	1	1	1	Unknown
Non_sig	Cla000483	0.863	0.685	0.635	0.4	0.6	0.1	1	1-aminocyclopropane-1-carboxylate
Non_sig	Cla000484	0.867	0.991	0.99	0.1	0.2	0.1	0.1	Unknown
Non_sig	Cla000485	0.886	0.812	0.657	0.4	0.3	0.2	0.1	Unknown
Non_sig	Cla000486	0.969	0.97	0.969	1	1	1	1	Unknown
Non_sig	Cla000487	0.969	0.97	0.969	1	1	1	1	Unknown
Non_sig	Cla000489	0.407	0.376	0.99	0.1	1	1	0.1	Unknown
Non_sig	Cla000491	0.969	0.97	0.969	1	1	1	1	Unknown
Non_sig	Cla000492	0.843	0.866	0.843	0.2	0.1	0.1	0.1	Unknown
Non_sig	Cla000493	0.969	0.97	0.969	1	1	1	1	Ty3-gypsy
Non_sig	Cla000494	0.867	0.376	0.99	0.1	0.2	1	0.1	Unknown
Non_sig	Cla000495	0.969	0.97	0.969	1	1	1	1	Unknown
Non_sig	Cla000496	0.677	0.466	0.509	3.3	4.7	5.2	5.5	Sieve
Non_sig	Cla000497	0.513	0.125	0.033	2.2	4	6.5	10	Homology
Non_sig	Cla000498	0.969	0.97	0.969	1	1	1	1	Unknown
Non_sig	Cla000499	0.969	0.97	0.969	1	1	1	1	Unknown
Non_sig	Cla000500	0.969	0.97	0.969	1	1	1	1	Unknown
Non_sig	Cla000501	0.969	0.97	0.969	1	1	1	1	Unknown
Non_sig	Cla000502	0.969	0.97	0.969	1	1	1	1	Polygalacturonase
Non_sig	Cla000503	0.969	0.97	0.969	1	1	1	1	Polygalacturonase
Non_sig	Cla000504	0.969	0.97	0.969	1	1	1	1	Polygalacturonase
Non_sig	Cla000505	0.969	0.97	0.969	1	1	1	1	Unknown
Non_sig	Cla000506	0.969	0.97	0.969	1	1	1	1	Polygalacturonase
Non_sig	Cla000507	0.969	0.97	0.969	1	1	1	1	Unknown
Non_sig	Cla000508	0.969	0.97	0.969	1	1	1	1	Unknown
Non_sig	Cla000509	0.969	0.97	0.969	1	1	1	1	Unknown
Non_sig	Cla000510	0.969	0.97	0.969	1	1	1	1	Unknown
Non_sig	Cla000511	0.983	0.984	0.872	0.3	0.3	0.3	0.2	Unknown
Non_sig	Cla000512	0.969	0.97	0.969	1	1	1	1	Unknown
Non_sig	Cla000513	0.706	0.325	0.356	14.3	17.3	19.1	10.4	Chlorophyll
Non_sig	Cla000514	0.728	0.771	0.637	0.6	1.1	0.3	0.2	Unknown
Non_sig	Cla000515	0.457	0.561	0.413	16.5	22.2	12.6	22.7	Proton
Non_sig	Cla000516	0.899	0.905	0.059	22.2	22.6	20.3	38.6	Squamosa
Non_sig	Cla000517	0.583	0.251	0.221	3.2	5	0.8	7.5	Receptor-like
Non_sig	Cla000519	0.969	0.97	0.969	1	1	1	1	TMV
Non_sig	Cla000520	0.486	0.313	0.268	17.1	22.6	22.4	25.5	Tetratricopeptide
Non_sig	Cla000521	0.988	0.331	0.472	11.8	12.4	16.2	16.4	Hydroxyproline-rich
Non_sig	Cla000522	0.874	0.661	0.905	10.8	12.2	12.3	12	Integral
Non_sig	Cla000524	0.969	0.97	0.969	1	1	1	1	60S
Non_sig	Cla000525	0.931	0.342	0.119	2	2.3	4.2	6.9	DNAJ
Non_sig	Cla000526	0.871	0.613	0.526	26.4	26.7	28.7	23.3	UPF0047
Non_sig	Cla000527	0.698	0.505	0.805	2.8	4	4.4	3.6	Phosphodiesterase/alkaline
Non_sig	Cla000528	0.431	0.531	0.729	2.9	5.4	4.4	4	Alkaline
Non_sig	Cla000529	0.969	0.97	0.969	1	1	1	1	Unknown
Non_sig	Cla000530	0.969	0.97	0.969	1	1	1	1	Beta-galactosidase
Non_sig	Cla000531	0.969	0.97	0.969	1	1	1	1	Unknown
Non_sig	Cla000532	0.734	0.191	0.337	2.6	2	0.3	0.9	Unknown
Non_sig	Cla000533	0.969	0.97	0.969	1	1	1	1	Unknown
Non_sig	Cla000534	0.375	0.406	0.375	1	0.1	0.1	0.1	Unknown
Non_sig	Cla000535	0.256	0.132	0.172	3.7	1.3	0.5	0.9	Peroxidase
Non_sig	Cla000536	0.969	0.97	0.969	1	1	1	1	Unknown
Non_sig	Cla000537	0.969	0.97	0.969	1	1	1	1	Unknown
Non_sig	Cla000538	0.969	0.97	0.969	1	1	1	1	Unknown
Non_sig	Cla000540	0.57	0.477	0.418	2.4	1.4	1	1	Dof
Non_sig	Cla000541	0.283	0.402	0.192	9.7	5.9	13.1	17.2	Ribosomal
Non_sig	Cla000542	0.968	0.854	0.76	0.8	0.9	1	1.3	tRNA-splicing
Non_sig	Cla000543	0.743	0.337	0.329	3.7	4.9	1.4	1.6	Interactor
Non_sig	Cla000544	0.687	0.799	0.687	3.5	4.9	4	4.9	Senescence-associated
Non_sig	Cla000545	0.752	0.378	0.128	0.7	0.4	2.1	4.2	LOB
Non_sig	Cla000546	0.548	0.253	0.095	1.8	3.3	4.5	7	Ubiquitin-protein
Non_sig	Cla000547	0.566	0.487	0.476	0.1	0.6	0.7	0.8	Ubiquitin-protein
Non_sig	Cla000548	0.155	0.902	0.812	14.6	24.6	14.5	16.8	Hydrolase
Non_sig	Cla000549	0.932	0.793	0.913	1.1	1.3	0.7	1	MaoC
Non_sig	Cla000550	0.721	0.25	0.613	4.6	3.8	8.4	6.6	Adenylate
Non_sig	Cla000551	0.871	0.724	0.999	1.7	1.5	2.3	1.8	Vicilin
Non_sig	Cla000552	0.879	0.614	0.319	2.6	2.4	3.7	5.7	Protein
Non_sig	Cla000553	0.905	0.517	0.487	0.7	0.6	0.1	0.1	Elongation
Non_sig	Cla000554	0.56	0.142	0.119	0.3	1	2.8	3.4	Unknown
Non_sig	Cla000557	0.687	0.503	0.015	13.9	17	10	4.1	Auxin
Non_sig	Cla000558	0.886	0.812	0.797	0.4	0.3	0.2	0.7	Unknown
Non_sig	Cla000559	0.969	0.97	0.969	1	1	1	1	OTU
Non_sig	Cla000560	0.969	0.97	0.969	1	1	1	1	Unknown
Non_sig	Cla000562	0.943	0.377	0.855	4.7	5.2	2.2	4.4	Flavoprotein
Non_sig	Cla000564	0.969	0.97	0.969	1	1	1	1	Unknown
Non_sig	Cla000565	0.969	0.97	0.375	1	1	1	0.1	Unknown
Non_sig	Cla000567	0.843	0.448	0.484	0.2	0.1	1	1	Unknown
Non_sig	Cla000568	0.969	0.97	0.969	1	1	1	1	Zinc
Non_sig	Cla000569	0.969	0.97	0.969	1	1	1	1	Major
Non_sig	Cla000570	0.375	0.406	0.969	1	0.1	0.1	1	Unknown
Non_sig	Cla000571	0.969	0.97	0.969	1	1	1	1	Ty3-gypsy
Non_sig	Cla000572	0.969	0.97	0.969	1	1	1	1	Unknown
Non_sig	Cla000573	0.969	0.97	0.969	1	1	1	1	Unknown
Non_sig	Cla000574	0.969	0.97	0.969	1	1	1	1	Unknown
Non_sig	Cla000575	0.679	0.361	0.631	2.9	4.2	5.3	4.4	Phosphatidylinositol-4-phosphate
Non_sig	Cla000576	0.99	0.991	0.407	0.1	0.1	0.1	1	Unknown
Non_sig	Cla000577	0.937	0.685	0.887	0.4	0.5	0.1	0.3	Unknown
Non_sig	Cla000578	0.574	0.308	0.624	10.7	14.2	15.2	13.8	Phosphatidylinositol-4-phosphate
Non_sig	Cla000579	0.969	0.97	0.969	1	1	1	1	Unknown
Non_sig	Cla000580	0.969	0.97	0.969	1	1	1	1	Unknown
Non_sig	Cla000581	0.969	0.97	0.969	1	1	1	1	Unknown
Non_sig	Cla000582	0.607	0.787	0.093	6.2	4.8	5	14.4	Myb
Non_sig	Cla000583	0.983	0.764	0.872	0.3	0.3	0.1	0.2	Unknown
Non_sig	Cla000584	0.969	0.97	0.969	1	1	1	1	Unknown
Non_sig	Cla000585	0.99	0.376	0.407	0.1	0.1	1	1	Expansin
Non_sig	Cla000586	0.969	0.97	0.969	1	1	1	1	Unknown
Non_sig	Cla000587	0.969	0.97	0.969	1	1	1	1	Unknown
Non_sig	Cla000588	0.969	0.97	0.969	1	1	1	1	Unknown
Non_sig	Cla000589	0.969	0.97	0.969	1	1	1	1	Unknown
Non_sig	Cla000590	0.969	0.97	0.969	1	1	1	1	Unknown
Non_sig	Cla000591	0.375	0.97	0.969	1	0.1	1	1	Unknown
Non_sig	Cla000592	0.969	0.97	0.969	1	1	1	1	Unknown
Non_sig	Cla000593	0.99	0.991	0.99	0.1	0.1	0.1	0.1	Unknown
Non_sig	Cla000594	0.986	0.987	0.986	0.2	0.2	0.2	0.2	Unknown
Non_sig	Cla000595	0.969	0.97	0.969	1	1	1	1	Unknown
Non_sig	Cla000596	0.983	0.984	0.983	0.3	0.3	0.3	0.3	Unknown
Non_sig	Cla000597	0.969	0.97	0.969	1	1	1	1	Unknown
Non_sig	Cla000598	0.969	0.97	0.969	1	1	1	1	Unknown
Non_sig	Cla000599	0.969	0.97	0.969	1	1	1	1	Unknown
Non_sig	Cla000600	0.969	0.97	0.969	1	1	1	1	Ty3-gypsy
Non_sig	Cla000601	0.969	0.97	0.969	1	1	1	1	Unknown
Non_sig	Cla000602	0.969	0.97	0.969	1	1	1	1	Unknown
Non_sig	Cla000603	0.969	0.97	0.969	1	1	1	1	Unknown
Non_sig	Cla000604	0.797	0.812	0.797	0.4	0.7	0.2	0.7	Dof
Non_sig	Cla000605	0.969	0.97	0.969	1	1	1	1	Unknown
Non_sig	Cla000606	0.39	0.806	0.567	1.2	3.1	0.8	0.5	Rhamnogalacturonate
Non_sig	Cla000607	0.99	0.376	0.99	0.1	0.1	1	0.1	Unknown
Non_sig	Cla000608	0.969	0.97	0.969	1	1	1	1	Unknown
Non_sig	Cla000609	0.772	0.657	0.706	1.7	2.4	2.5	2.6	Mitochondrial
Non_sig	Cla000611	0.407	0.376	0.407	0.1	1	1	1	Unknown
Non_sig	Cla000612	0.475	0.424	0.104	14.4	19.5	18.1	25.8	Glucose-6-phosphate
Non_sig	Cla000613	0.969	0.97	0.969	1	1	1	1	Unknown
Non_sig	Cla000614	0.956	0.622	0.118	9.6	9.9	11.3	18.7	SEC1
Non_sig	Cla000615	0.876	0.639	0.596	1	1.3	1.7	2	Phosphoglycerate
Non_sig	Cla000616	0.969	0.97	0.969	1	1	1	1	Unknown
Non_sig	Cla000617	0.878	0.154	0.503	3.2	3.8	7.6	5.4	Ser/Thr-rich
Non_sig	Cla000618	0.969	0.97	0.969	1	1	1	1	Unknown
Non_sig	Cla000619	0.903	0.987	0.813	0.2	0.3	0.2	0.4	Unknown
Non_sig	Cla000620	0.969	0.97	0.969	1	1	1	1	Ty3-gypsy
Non_sig	Cla000621	0.375	0.97	0.375	1	0.1	1	0.1	Unknown
Non_sig	Cla000622	0.886	0.981	0.937	0.4	0.3	0.4	0.5	Kinesin
Non_sig	Cla000623	0.926	0.909	0.969	1	1.2	0.8	1	Unknown
Non_sig	Cla000624	0.916	0.79	0.418	2.1	2	1.5	0.8	FtsH
Non_sig	Cla000625	0.923	0.978	0.694	6	6.7	5.6	5	FtsH
Non_sig	Cla000626	0.626	0.631	0.922	1.8	3	2.7	2.1	FtsH
Non_sig	Cla000627	0.815	0.41	0.978	3	3.8	1.2	3.1	Acyl-
Non_sig	Cla000628	0.403	0.784	0.253	1.5	0.4	1	0.1	TO23-3
Non_sig	Cla000629	0.769	0.934	0.925	5	6.3	5	5.6	Chromatin
Non_sig	Cla000630	0.969	0.97	0.969	1	1	1	1	Unknown
Non_sig	Cla000631	0.375	0.97	0.375	1	0.1	1	0.1	Unknown
Non_sig	Cla000632	0.941	0.282	0.082	4.6	5.1	8.1	12.2	One
Non_sig	Cla000634	0.969	0.97	0.969	1	1	1	1	Unknown
Non_sig	Cla000635	0.969	0.97	0.969	1	1	1	1	Unknown
Non_sig	Cla000636	0.969	0.97	0.375	1	1	1	0.1	Unknown
Non_sig	Cla000637	0.969	0.97	0.969	1	1	1	1	Unknown
Non_sig	Cla000638	0.969	0.97	0.969	1	1	1	1	Unknown
Non_sig	Cla000639	0.843	0.448	0.843	0.2	0.1	1	0.1	Unknown
Non_sig	Cla000640	0.969	0.97	0.969	1	1	1	1	Unknown
Non_sig	Cla000641	0.375	0.406	0.375	1	0.1	0.1	0.1	Unknown
Non_sig	Cla000642	0.969	0.97	0.969	1	1	1	1	Unknown
Non_sig	Cla000643	0.969	0.97	0.969	1	1	1	1	Unknown
Non_sig	Cla000644	0.969	0.97	0.969	1	1	1	1	Unknown
Non_sig	Cla000645	0.969	0.97	0.969	1	1	1	1	Unknown
Non_sig	Cla000646	0.375	0.97	0.375	1	0.1	1	0.1	Unknown
Non_sig	Cla000647	0.804	0.736	0.804	0.5	0.3	0.2	0.3	Unknown
Non_sig	Cla000648	0.969	0.97	0.969	1	1	1	1	Unknown
Non_sig	Cla000649	0.969	0.97	0.969	1	1	1	1	Unknown
Non_sig	Cla000650	0.969	0.97	0.969	1	1	1	1	Unknown
Non_sig	Cla000651	0.375	0.406	0.969	1	0.1	0.1	1	Unknown
Non_sig	Cla000652	0.969	0.97	0.969	1	1	1	1	Unknown
Non_sig	Cla000654	0.969	0.97	0.969	1	1	1	1	Gag/pol
Non_sig	Cla000655	0.826	0.558	0.117	46.9	47.4	39.2	35	Cytochrome
Non_sig	Cla000656	0.969	0.97	0.969	1	1	1	1	Unknown
Non_sig	Cla000657	0.969	0.97	0.969	1	1	1	1	Unknown
Non_sig	Cla000658	0.969	0.97	0.969	1	1	1	1	Unknown
Non_sig	Cla000659	0.969	0.97	0.969	1	1	1	1	Unknown
Non_sig	Cla000660	0.969	0.97	0.969	1	1	1	1	Unknown
Non_sig	Cla000661	0.407	0.376	0.407	0.1	1	1	1	Unknown
Non_sig	Cla000662	0.737	0.865	0.61	1.1	0.7	1.3	2.1	F-box
Non_sig	Cla000663	0.84	0.247	0.101	6.9	8.1	3	2.2	Unknown
Non_sig	Cla000665	0.969	0.97	0.375	1	1	1	0.1	Unknown
Non_sig	Cla000666	0.969	0.97	0.969	1	1	1	1	Unknown
Non_sig	Cla000667	0.647	0.647	0.036	22.4	27	18.4	11.2	Violaxanthin
Non_sig	Cla000668	0.407	0.991	0.407	0.1	1	0.1	1	Unknown
Non_sig	Cla000669	0.831	0.975	0.753	0.7	0.5	0.7	0.4	Unknown
Non_sig	Cla000670	0.99	0.844	0.765	0.1	0.1	0.2	0.3	Unknown
Non_sig	Cla000671	0.969	0.97	0.969	1	1	1	1	Unknown
Non_sig	Cla000672	0.969	0.97	0.969	1	1	1	1	Unknown
Non_sig	Cla000673	0.969	0.97	0.969	1	1	1	1	Unknown
Non_sig	Cla000674	0.969	0.97	0.969	1	1	1	1	Unknown
Non_sig	Cla000675	0.969	0.483	0.375	1	1	0.2	0.1	Unknown
Non_sig	Cla000676	0.823	0.471	0.424	1.6	1.3	0.5	0.5	Cold-shock
Non_sig	Cla000677	0.969	0.97	0.969	1	1	1	1	Unknown
Non_sig	Cla000678	0.969	0.97	0.969	1	1	1	1	Unknown
Non_sig	Cla000679	0.969	0.97	0.969	1	1	1	1	Gag/pol
Non_sig	Cla000680	0.969	0.97	0.375	1	1	1	0.1	Unknown
Non_sig	Cla000682	0.969	0.97	0.969	1	1	1	1	Unknown
Non_sig	Cla000684	0.888	0.994	0.6	3.5	4.1	3.3	5.3	Uncharacterized
Non_sig	Cla000686	0.919	0.338	0.331	0.9	1.1	2.6	2.9	Unknown
Non_sig	Cla000687	0.483	0.081	0.036	11.8	16.3	20.9	25.7	Calmodulin-binding
Non_sig	Cla000688	0.842	0.416	0.273	2.3	2.9	4.2	5.6	Calmodulin-binding
Non_sig	Cla000689	0.752	0.796	0.905	0.7	0.4	0.4	0.6	Os02g0508100
Non_sig	Cla000690	0.984	0.331	0.982	10.4	10.9	14.6	11.1	Unknown
Non_sig	Cla000691	0.737	0.531	0.416	0.2	0.5	0.8	1.2	Transcription
Non_sig	Cla000692	0.969	0.97	0.969	1	1	1	1	Unknown
Non_sig	Cla000693	0.867	0.274	0.44	0.1	0.2	1.4	0.9	Unknown
Non_sig	Cla000694	0.375	0.97	0.969	1	0.1	1	1	Fasciclin-like
Non_sig	Cla000695	0.969	0.97	0.969	1	1	1	1	Unknown
Non_sig	Cla000696	0.969	0.97	0.969	1	1	1	1	Ty3-gypsy
Non_sig	Cla000697	0.692	0.65	0.257	7.4	9.5	8.8	13.1	Os03g0102400
Non_sig	Cla000698	0.969	0.97	0.969	1	1	1	1	Unknown
Non_sig	Cla000699	0.969	0.97	0.969	1	1	1	1	Unknown
Non_sig	Cla000700	0.375	0.406	0.375	1	0.1	0.1	0.1	Unknown
Non_sig	Cla000701	0.884	0.536	0.033	24.7	27.2	27.8	44.3	AP2-like
Non_sig	Cla000702	0.825	0.378	0.502	2.6	3.3	4.8	4.6	OTU
Non_sig	Cla000703	0.686	0.991	0.867	0.1	0.4	0.1	0.2	BHLH
Non_sig	Cla000704	0.25	0.017	0.866	25.2	18.8	10.1	25.4	Receptor-like
Non_sig	Cla000705	0.744	0.327	0.934	10.4	9.5	6	10.6	Uncharacterized
Non_sig	Cla000706	0.813	0.448	0.843	0.2	0.4	1	0.1	Os04g0689500
Non_sig	Cla000707	0.923	0.519	0.204	0.3	0.4	1	2.5	Serine/threonine-protein
Non_sig	Cla000708	0.892	0.565	0.535	0.6	0.8	0.1	0.1	Lipase
Non_sig	Cla000710	0.838	0.543	0.954	2.2	1.9	3.5	2.2	Remorin
Non_sig	Cla000711	0.875	0.634	0.627	1.6	2	0.8	0.9	Unknown
Non_sig	Cla000712	0.436	0.051	0.015	0.6	1.9	5.1	8	Pentatricopeptide
Non_sig	Cla000714	0.969	0.406	0.375	1	1	0.1	0.1	Ethylene
Non_sig	Cla000716	0.8	0.085	0.672	4.6	5.7	11	6.3	ATP-dependent
Non_sig	Cla000717	0.986	0.448	0.484	0.2	0.2	1	1	Unknown
Non_sig	Cla000718	0.623	0.345	0.114	22.8	27.7	28.2	36.6	Os10g0382300
Non_sig	Cla000719	0.447	0.559	0.447	1	0.2	0.3	0.2	Unknown
Non_sig	Cla000720	0.846	0.475	0.775	4.6	5.5	6.7	4	Pentatricopeptide
Non_sig	Cla000721	0.407	0.844	0.765	0.1	1	0.2	0.3	Unknown
Non_sig	Cla000722	0.969	0.97	0.969	1	1	1	1	Unknown
Non_sig	Cla000723	0.99	0.376	0.99	0.1	0.1	1	0.1	Unknown
Non_sig	Cla000724	0.969	0.97	0.969	1	1	1	1	Unknown
Non_sig	Cla000725	0.969	0.97	0.969	1	1	1	1	Unknown
Non_sig	Cla000726	0.969	0.97	0.969	1	1	1	1	Unknown
Non_sig	Cla000727	0.969	0.97	0.969	1	1	1	1	Unknown
Non_sig	Cla000728	0.969	0.97	0.969	1	1	1	1	Unknown
Non_sig	Cla000729	0.969	0.97	0.969	1	1	1	1	Unknown
Non_sig	Cla000730	0.903	0.873	0.986	0.2	0.3	0.3	0.2	Unknown
Non_sig	Cla000731	0.855	0.959	0.854	1.9	2.4	1.9	2.4	UDP-N-acetylglucosamine
Non_sig	Cla000732	0.99	0.376	0.99	0.1	0.1	1	0.1	Unknown
Non_sig	Cla000733	0.99	0.991	0.99	0.1	0.1	0.1	0.1	Unknown
Non_sig	Cla000734	0.84	0.349	0.102	26.2	26.2	31.8	41.5	Cytochrome
Non_sig	Cla000735	0.898	0.702	0.942	1.3	1.6	1.9	1.5	Exostosin
Non_sig	Cla000736	0.969	0.97	0.969	1	1	1	1	Unknown
Non_sig	Cla000737	0.591	0.642	0.282	2	3.4	1.1	0.4	Receptor-like
Non_sig	Cla000738	0.375	0.406	0.375	1	0.1	0.1	0.1	Gag
Non_sig	Cla000739	0.99	0.991	0.99	0.1	0.1	0.1	0.1	Unknown
Non_sig	Cla000740	0.969	0.97	0.969	1	1	1	1	Unknown
Non_sig	Cla000741	0.969	0.97	0.969	1	1	1	1	Unknown
Non_sig	Cla000742	0.969	0.406	0.447	1	1	0.1	0.2	Ras-related
Non_sig	Cla000743	0.563	0.522	0.563	0.9	0.3	0.2	0.3	Polychome
Non_sig	Cla000744	0.969	0.97	0.969	1	1	1	1	Cytochrome
Non_sig	Cla000745	0.96	0.938	0.02	4.4	4.5	4.4	15.2	Polygalacturonase-inhibitor
Non_sig	Cla000746	0.969	0.97	0.969	1	1	1	1	Beta-galactosidase
Non_sig	Cla000747	0.969	0.97	0.969	1	1	1	1	Unknown
Non_sig	Cla000748	0.99	0.991	0.99	0.1	0.1	0.1	0.1	Unknown
Non_sig	Cla000749	0.969	0.97	0.969	1	1	1	1	Unknown
Non_sig	Cla000750	0.969	0.97	0.969	1	1	1	1	Unknown
Non_sig	Cla000751	0.969	0.97	0.969	1	1	1	1	Unknown
Non_sig	Cla000752	0.969	0.97	0.969	1	1	1	1	Pentatricopeptide
Non_sig	Cla000754	0.953	0.904	0.667	2.7	3	2.3	4	Ras-related
Non_sig	Cla000755	0.969	0.97	0.969	1	1	1	1	Monooxygenase
Non_sig	Cla000756	0.808	0.854	0.908	0.8	1.2	1	0.7	Unknown
Non_sig	Cla000757	0.98	0.812	0.887	0.4	0.4	0.2	0.3	Unknown
Non_sig	Cla000758	0.969	0.97	0.969	1	1	1	1	Unknown
Non_sig	Cla000760	0.682	0.565	0.535	0.6	1.2	0.1	0.1	Dirigent
Non_sig	Cla000761	0.846	0.122	0.305	10.9	10.6	18.5	17.1	2-octaprenyl-3-methyl-6-methoxy-1
Non_sig	Cla000762	0.689	0.612	0.512	4	5.5	5.3	6.4	Calcium
Non_sig	Cla000763	0.986	0.866	0.813	0.2	0.2	0.1	0.4	ATP
Non_sig	Cla000764	0.7	0.637	0.643	1.3	0.8	0.6	0.7	Unknown
Non_sig	Cla000765	0.407	0.535	0.407	0.1	1	0.6	1	Respiratory
Non_sig	Cla000766	0.969	0.97	0.969	1	1	1	1	Unknown
Non_sig	Cla000767	0.375	0.97	0.969	1	0.1	1	1	Myb-related
Non_sig	Cla000768	0.375	0.97	0.375	1	0.1	1	0.1	Unknown
Non_sig	Cla000769	0.969	0.97	0.969	1	1	1	1	Unknown
Non_sig	Cla000770	0.969	0.97	0.969	1	1	1	1	Unknown
Non_sig	Cla000771	0.881	0.637	0.483	4.1	3.9	5.3	6.7	Frataxin-like
Non_sig	Cla000772	0.969	0.97	0.969	1	1	1	1	Unknown
Non_sig	Cla000773	0.375	0.97	0.969	1	0.1	1	1	Unknown
Non_sig	Cla000774	0.969	0.97	0.969	1	1	1	1	Unknown
Non_sig	Cla000775	0.969	0.97	0.969	1	1	1	1	Unknown
Non_sig	Cla000776	0.969	0.97	0.969	1	1	1	1	Unknown
Non_sig	Cla000777	0.962	0.631	0.133	1.8	2	2.7	6.3	Threonine
Non_sig	Cla000779	0.969	0.97	0.969	1	1	1	1	Unknown
Non_sig	Cla000780	0.969	0.97	0.969	1	1	1	1	Unknown
Non_sig	Cla000781	0.929	0.189	0.266	8.3	8.4	13.9	14.2	Cell
Non_sig	Cla000782	0.288	0.925	0.704	9.9	6.1	9.8	12.3	60S
Non_sig	Cla000783	0.97	0.151	0.272	15.4	16.5	23.3	23.3	Pre-mRNA-splicing
Non_sig	Cla000784	0.969	0.97	0.969	1	1	1	1	Unknown
Non_sig	Cla000785	0.969	0.97	0.969	1	1	1	1	Unknown
Non_sig	Cla000786	0.934	0.491	0.65	9.2	10.1	11.8	7.8	Integral
Non_sig	Cla000787	0.969	0.97	0.969	1	1	1	1	Unknown
Non_sig	Cla000788	0.089	0.508	0.132	8.5	18	10.9	3.6	Os04g0347800
Non_sig	Cla000789	0.671	0.117	0.379	2	3.1	6.3	4.4	Tic22-like
Non_sig	Cla000790	0.969	0.97	0.969	1	1	1	1	Unknown
Non_sig	Cla000791	0.969	0.97	0.969	1	1	1	1	Unknown
Non_sig	Cla000792	0.949	0.749	0.341	10.5	10.8	8.6	7	Ribosomal
Non_sig	Cla000793	0.447	0.406	0.447	1	0.2	0.1	0.2	Unknown
Non_sig	Cla000794	0.374	0.742	0.235	1.6	0.4	1	0.1	Expressed
Non_sig	Cla000795	0.768	0.701	0.716	0.8	0.5	1.3	1.4	Unknown
Non_sig	Cla000797	0.774	0.361	0.015	12	14.2	16.1	28.6	OB-fold
Non_sig	Cla000800	0.727	0.045	0.037	4.4	5.8	12.1	13.8	Os09g0327550
Non_sig	Cla000801	0.879	0.769	0.442	0.5	0.7	0.8	1.7	F8A5.1
Non_sig	Cla000803	0.856	0.975	0.61	1.1	0.9	1	0.5	Pentatricopeptide
Non_sig	Cla000804	0.684	0.296	0.626	1.8	2.8	4.2	3	UPF0712
Non_sig	Cla000805	0.975	0.685	0.588	9.7	10.4	11	12.9	Baculoviral
Non_sig	Cla000806	0.832	0.11	0.028	6.3	5.9	1.6	0.7	Plant-specific
Non_sig	Cla000807	0.99	0.376	0.407	0.1	0.1	1	1	CRABS
Non_sig	Cla000808	0.946	0.012	0.034	3.6	4	13.5	12.6	MRNA
Non_sig	Cla000809	0.112	0.614	0.047	26.8	41.9	29.1	15.1	Succinyl-CoA
Non_sig	Cla000811	0.876	0.834	0.754	2.1	1.9	1.6	1.6	Trichome
Non_sig	Cla000812	0.969	0.97	0.969	1	1	1	1	Knotted-like
Non_sig	Cla000813	0.407	0.376	0.407	0.1	1	1	1	Homeobox
Non_sig	Cla000814	0.897	0.949	0.703	9	10.1	8.8	7.9	Ubiquinone/menaquinone
Non_sig	Cla000816	0.514	0.862	0.69	12.9	10.4	11.4	11.6	Receptor-like
Non_sig	Cla000817	0.99	0.844	0.99	0.1	0.1	0.2	0.1	Plant
Non_sig	Cla000818	0.619	0.321	0.245	2	1.2	0.4	0.3	Carboxyl-terminal
Non_sig	Cla000819	0.942	0.098	0.855	5.9	6.5	12.5	5.6	Alliinase
Non_sig	Cla000820	0.826	0.836	0.369	1.7	1.4	2	4	Condensin-2
Non_sig	Cla000821	0.969	0.97	0.969	1	1	1	1	Unknown
Non_sig	Cla000822	0.407	0.991	0.407	0.1	1	0.1	1	Unknown
Non_sig	Cla000823	0.969	0.97	0.969	1	1	1	1	Unknown
Non_sig	Cla000824	0.804	0.736	0.978	0.5	0.3	0.2	0.5	Endosomal
Non_sig	Cla000825	0.969	0.97	0.969	1	1	1	1	Unknown
Non_sig	Cla000826	0.969	0.97	0.969	1	1	1	1	Unknown
Non_sig	Cla000828	0.623	0.821	0.301	1.2	2.2	1.5	3.6	C2
Non_sig	Cla000829	0.193	0.758	0.53	17.6	11.4	18.5	22.7	60S
Non_sig	Cla000830	0.486	0.439	0.486	0.9	0.2	0.1	0.2	Double-strand-break
Non_sig	Cla000831	0.413	0.231	0.203	1.8	0.6	0.1	0.1	Polygalacturonase-inhibitor
Non_sig	Cla000832	0.882	0.303	0.198	4.2	4.9	7.4	9.3	Helicase
Non_sig	Cla000833	0.969	0.97	0.375	1	1	1	0.1	Retrotransposon
Non_sig	Cla000834	0.863	0.896	0.937	0.4	0.6	0.5	0.5	Unknown
Non_sig	Cla000835	0.822	0.32	0.024	28.1	31.5	34.3	14.5	Pentatricopeptide
Non_sig	Cla000836	0.99	0.844	0.99	0.1	0.1	0.2	0.1	Unknown
Non_sig	Cla000837	0.969	0.97	0.969	1	1	1	1	Unknown
Non_sig	Cla000838	0.794	0.303	0.155	8.1	9.7	12.2	15.7	Uncharacterized
Non_sig	Cla000839	0.765	0.991	0.377	0.1	0.3	0.1	1.1	N-6
Non_sig	Cla000841	0.969	0.298	0.141	3.4	3.7	6.4	8.9	ATP
Non_sig	Cla000842	0.969	0.97	0.969	1	1	1	1	Unknown
Non_sig	Cla000843	0.616	0.757	0.97	0.9	1.8	1.3	0.9	Cystinosin
Non_sig	Cla000844	0.969	0.97	0.969	1	1	1	1	Unknown
Non_sig	Cla000845	0.867	0.991	0.99	0.1	0.2	0.1	0.1	Unknown
Non_sig	Cla000846	0.969	0.97	0.969	1	1	1	1	Major
Non_sig	Cla000847	0.969	0.97	0.969	1	1	1	1	Unknown
Non_sig	Cla000849	0.969	0.97	0.969	1	1	1	1	Unknown
Non_sig	Cla000850	0.574	0.045	0.678	63.8	61	84.3	72.4	Protein
Non_sig	Cla000851	0.921	0.355	0.159	12.3	12.5	16.5	21.4	Cysteinyl-tRNA
Non_sig	Cla000852	0.842	0.805	0.923	0.3	0.5	0.5	0.4	CACTA
Non_sig	Cla000853	0.649	0.764	0.728	5	6.9	5.7	4.2	Receptor-like
Non_sig	Cla000854	0.863	0.759	0.643	1.3	1.1	0.8	0.7	tRNA
Non_sig	Cla000856	0.375	0.406	0.589	1	0.1	0.1	0.4	Unknown
Non_sig	Cla000857	0.975	0.434	0.46	3.2	3.3	1.4	1.7	Unknown
Non_sig	Cla000860	0.969	0.97	0.969	1	1	1	1	Unknown
Non_sig	Cla000861	0.969	0.97	0.969	1	1	1	1	RNA-binding
Non_sig	Cla000862	0.969	0.97	0.969	1	1	1	1	Unknown
Non_sig	Cla000863	0.969	0.97	0.969	1	1	1	1	Unknown
Non_sig	Cla000864	0.969	0.97	0.969	1	1	1	1	Unknown
Non_sig	Cla000865	0.969	0.97	0.969	1	1	1	1	Unknown
Non_sig	Cla000866	0.969	0.97	0.969	1	1	1	1	Unknown
Non_sig	Cla000867	0.969	0.97	0.969	1	1	1	1	Unknown
Non_sig	Cla000868	0.969	0.97	0.969	1	1	1	1	Unknown
Non_sig	Cla000869	0.969	0.97	0.969	1	1	1	1	Unknown
Non_sig	Cla000870	0.969	0.97	0.969	1	1	1	1	Unknown
Non_sig	Cla000871	0.364	0.97	0.534	1	2.9	1	2.2	1-deoxy-D-xylulose
Non_sig	Cla000872	0.969	0.97	0.969	1	1	1	1	1-deoxy-D-xylulose
Non_sig	Cla000873	0.375	0.97	0.969	1	0.1	1	1	Cation/H(+)
Non_sig	Cla000875	0.969	0.97	0.969	1	1	1	1	Unknown
Non_sig	Cla000877	0.689	0.305	0.333	1.5	2.4	3.7	3.9	CRS2-associated
Non_sig	Cla000878	0.997	0.881	0.263	5	5.3	4.3	9.7	Unknown
Non_sig	Cla000879	0.969	0.97	0.969	1	1	1	1	Cytochrome
Non_sig	Cla000880	0.969	0.97	0.969	1	1	1	1	Unknown
Non_sig	Cla000881	0.969	0.406	0.447	1	1	0.1	0.2	Unknown
Non_sig	Cla000882	0.969	0.406	0.969	1	1	0.1	1	Cytochrome
Non_sig	Cla000883	0.407	0.376	0.867	0.1	1	1	0.2	mRNA
Non_sig	Cla000885	0.867	0.445	0.99	0.1	0.2	0.8	0.1	DS
Non_sig	Cla000886	0.986	0.987	0.843	0.2	0.2	0.2	0.1	Early
Non_sig	Cla000887	0.318	0.962	0.14	56.1	70.9	53.7	44.1	ATP-dependent
Non_sig	Cla000888	0.765	0.991	0.765	0.1	0.3	0.1	0.3	Unknown
Non_sig	Cla000889	0.621	0.289	0.123	3.5	5.2	6.6	9.4	Nucleoporin
Non_sig	Cla000890	0.566	0.805	0.779	2.3	3.9	1.7	3.1	Unknown
Non_sig	Cla000891	0.484	0.616	0.487	0.7	1.9	0.2	0.1	GATA
Non_sig	Cla000892	0.801	0.569	0.407	3.3	4.2	4.7	6.1	Protein
Non_sig	Cla000893	0.577	0.495	0.317	7.9	6.2	5.1	4.7	Class
Non_sig	Cla000894	0.765	0.738	0.563	6.2	7.7	4.8	4.6	Unknown
Non_sig	Cla000895	0.986	0.873	0.416	0.2	0.2	0.3	1.2	Avr9/Cf-9
Non_sig	Cla000896	0.518	0.094	0.048	9.9	13.7	18	21.9	Kinase
Non_sig	Cla000897	0.582	0.382	0.49	0.9	1.9	2.4	2.2	Sequence-specific
Non_sig	Cla000898	0.752	0.796	0.962	0.7	0.4	0.4	0.8	NAD-dependent
Non_sig	Cla000899	0.976	0.983	0.342	5.2	5.6	5	9.2	Myb
Non_sig	Cla000900	0.766	0.331	0.198	1.2	1.8	3.1	4.4	Protein
Non_sig	Cla000901	0.826	0.538	0.369	1.7	1.4	2.9	4	Histidine
Non_sig	Cla000902	0.867	0.544	0.921	9.7	9.5	6.8	9.8	RNA
Non_sig	Cla000903	0.661	0.956	0.886	5.3	7.2	5.2	6.1	MMS19
Non_sig	Cla000904	0.962	0.695	0.848	1.8	2	2.5	2.3	MMS19
Non_sig	Cla000905	0.542	0.07	0.682	8.9	12.3	17.5	11.3	Taurine
Non_sig	Cla000906	0.599	0.054	0.212	35.4	42.2	51	49.2	Poly(A)
Non_sig	Cla000907	0.926	0.406	0.969	1	1.2	0.1	1	Calmodulin-binding
Non_sig	Cla000908	0.923	0.902	0.739	0.3	0.4	0.2	0.1	Profilin
Non_sig	Cla000909	0.833	0.629	0.638	0.6	0.9	1.2	1.3	Unknown
Non_sig	Cla000911	0.729	0.028	0.199	7.3	6.4	17.6	3.4	GDSL
Non_sig	Cla000912	0.969	0.406	0.969	1	1	0.1	1	Receptor-like
Non_sig	Cla000913	0.863	0.685	0.635	0.4	0.6	0.1	1	Receptor-like
Non_sig	Cla000914	0.435	0.296	0.169	22	29	14.7	33.8	Receptor-like
Non_sig	Cla000915	0.491	0.134	0.814	3	5.2	7.6	3.8	Nuclear
Non_sig	Cla000916	0.969	0.406	0.969	1	1	0.1	1	Unknown
Non_sig	Cla000917	0.969	0.406	0.969	1	1	0.1	1	Unknown
Non_sig	Cla000918	0.99	0.376	0.99	0.1	0.1	1	0.1	Gag/pol
Non_sig	Cla000919	0.375	0.97	0.969	1	0.1	1	1	Unknown
Non_sig	Cla000920	0.83	0.325	0.65	4.1	5	7.1	5.8	5-AMP-activated
Non_sig	Cla000922	0.969	0.97	0.969	1	1	1	1	Retrotransposon
Non_sig	Cla000923	0.969	0.97	0.969	1	1	1	1	Unknown
Non_sig	Cla000924	0.842	0.984	0.772	0.3	0.5	0.3	0.6	Unknown
Non_sig	Cla000925	0.99	0.991	0.407	0.1	0.1	0.1	1	Unknown
Non_sig	Cla000926	0.872	0.764	0.739	0.3	0.2	0.1	0.1	Unknown
Non_sig	Cla000927	0.621	0.739	0.686	0.1	0.5	0.3	0.4	Unknown
Non_sig	Cla000928	0.969	0.97	0.969	1	1	1	1	Unknown
Non_sig	Cla000929	0.969	0.97	0.969	1	1	1	1	AP2-like
Non_sig	Cla000930	0.969	0.97	0.969	1	1	1	1	Unknown
Non_sig	Cla000931	0.969	0.97	0.969	1	1	1	1	Unknown
Non_sig	Cla000932	0.969	0.97	0.969	1	1	1	1	Unknown
Non_sig	Cla000933	0.79	0.037	0.403	4.3	5.4	12.4	7.5	DNA
Non_sig	Cla000934	0.969	0.97	0.969	1	1	1	1	Unknown
Non_sig	Cla000935	0.969	0.97	0.969	1	1	1	1	Unknown
Non_sig	Cla000936	0.969	0.97	0.969	1	1	1	1	Unknown
Non_sig	Cla000937	0.969	0.97	0.969	1	1	1	1	Unknown
Non_sig	Cla000938	0.969	0.97	0.969	1	1	1	1	Unknown
Non_sig	Cla000939	0.969	0.97	0.969	1	1	1	1	Unknown
Non_sig	Cla000940	0.969	0.97	0.969	1	1	1	1	Unknown
Non_sig	Cla000941	0.969	0.97	0.969	1	1	1	1	Unknown
Non_sig	Cla000942	0.969	0.97	0.969	1	1	1	1	Unknown
Non_sig	Cla000943	0.969	0.97	0.969	1	1	1	1	Unknown
Non_sig	Cla000944	0.969	0.97	0.969	1	1	1	1	Unknown
Non_sig	Cla000946	0.969	0.97	0.969	1	1	1	1	Unknown
Non_sig	Cla000947	0.969	0.97	0.969	1	1	1	1	Unknown
Non_sig	Cla000948	0.968	0.73	0.666	6	6.2	6.9	8	Serine/threonine-protein
Non_sig	Cla000949	0.846	0.158	0.173	10.9	10.6	17.7	19.2	Serine/threonine-protein
Non_sig	Cla000950	0.969	0.97	0.375	1	1	1	0.1	Unknown
Non_sig	Cla000951	0.833	0.586	0.891	0.6	0.9	1.3	0.8	Protein
Non_sig	Cla000952	0.99	0.844	0.867	0.1	0.1	0.2	0.2	Unknown
Non_sig	Cla000953	0.867	0.2	0.1	9.7	9.5	4.5	4	Unknown
Non_sig	Cla000954	0.775	0.846	0.907	8.6	7.9	7.4	9.6	Nicalin
Non_sig	Cla000955	0.867	0.739	0.565	0.1	0.2	0.3	0.6	Unknown
Non_sig	Cla000956	0.969	0.97	0.969	1	1	1	1	Unknown
Non_sig	Cla000957	0.867	0.991	0.867	0.1	0.2	0.1	0.2	Unknown
Non_sig	Cla000958	0.969	0.97	0.969	1	1	1	1	Unknown
Non_sig	Cla000959	0.971	0.271	0.38	15.5	16.6	21.2	21.9	OTU
Non_sig	Cla000960	0.969	0.97	0.969	1	1	1	1	Unknown
Non_sig	Cla000961	0.969	0.97	0.969	1	1	1	1	Unknown
Non_sig	Cla000962	0.969	0.97	0.447	1	1	1	0.2	Unknown
Non_sig	Cla000963	0.407	0.376	0.407	0.1	1	1	1	Unknown
Non_sig	Cla000964	0.846	0.526	0.581	0.7	1	1.6	1.6	Spermidine
Non_sig	Cla000966	0.969	0.97	0.969	1	1	1	1	Bidirectional
Non_sig	Cla000967	0.969	0.97	0.969	1	1	1	1	Bidirectional
Non_sig	Cla000968	0.969	0.97	0.375	1	1	1	0.1	Basic
Non_sig	Cla000969	0.843	0.866	0.813	0.2	0.1	0.1	0.4	Unknown
Non_sig	Cla000970	0.94	0.437	0.175	8.3	9.1	5.1	3.9	RING
Non_sig	Cla000971	0.783	0.31	0.828	5.6	5	2.5	6.7	Protein-tyrosine
Non_sig	Cla000972	0.969	0.97	0.969	1	1	1	1	Peroxisomal
Non_sig	Cla000974	0.967	0.449	0.175	3.8	3.9	5.9	9	Poly
Non_sig	Cla000975	0.583	0.501	0.284	3.2	5	1.6	1.1	Dof
Non_sig	Cla000976	0.812	0.378	0.576	15.5	17.8	19.8	19.8	Serine/threonine-protein
Non_sig	Cla000980	0.473	0.86	0.567	5.2	8.2	4.4	7.6	Phosphate
Non_sig	Cla000981	0.743	0.352	0.023	18.5	21.7	12.5	7.6	Protein
Non_sig	Cla000982	0.743	0.395	0.12	4.3	3.6	2	0.9	MRNA
Non_sig	Cla000983	0.915	0.636	0.806	2.5	2.4	3.5	2.1	Mitochondrial
Non_sig	Cla000984	0.903	0.987	0.986	0.2	0.3	0.2	0.2	Unknown
Non_sig	Cla000986	0.969	0.97	0.969	1	1	1	1	Unknown
Non_sig	Cla000987	0.969	0.97	0.969	1	1	1	1	Unknown
Non_sig	Cla000988	0.843	0.203	0.204	19.2	21.6	26.6	12.9	Os03g0425000
Non_sig	Cla000989	0.903	0.581	0.813	0.2	0.3	0.7	0.4	Gag/pol
Non_sig	Cla000990	0.969	0.406	0.375	1	1	0.1	0.1	Unknown
Non_sig	Cla000991	0.737	0.78	0.903	0.2	0.5	0.4	0.3	Unknown
Non_sig	Cla000992	0.763	0.306	0.231	3.6	4.7	6.6	8	Vacuolar
Non_sig	Cla000993	0.983	0.764	0.872	0.3	0.3	0.1	0.2	Unknown
Non_sig	Cla000994	0.969	0.97	0.375	1	1	1	0.1	Unknown
Non_sig	Cla000995	0.969	0.72	0.925	1	1	1.5	1.2	Unknown
Non_sig	Cla000996	0.408	0.17	0.879	4.1	2.2	0.9	4.8	Zinc
Non_sig	Cla000997	0.762	0.024	0.032	25.8	29.6	42.7	45.9	Vesicle-associated
Non_sig	Cla000998	0.969	0.97	0.969	1	1	1	1	Unknown
Non_sig	Cla000999	0.762	0.636	0.768	2.5	3.4	3.5	2	Unknown
Non_sig	Cla001000	0.969	0.97	0.969	1	1	1	1	Unknown
Non_sig	Cla001001	0.758	0.082	0.347	3.5	2.9	9.4	6.8	Zinc
Non_sig	Cla001002	0.782	0.011	0.234	5.4	4.8	16.7	10.6	Zinc-finger
Non_sig	Cla001003	0.53	0.415	0.481	4.7	7.2	7.2	7.5	Exocyst
Non_sig	Cla001004	0.947	0.712	0.472	0.5	0.6	0.9	1.6	Ribonuclease
Non_sig	Cla001005	0.804	0.979	0.879	0.5	0.3	0.5	0.7	Ribonuclease
Non_sig	Cla001006	0.693	0.878	0.314	1.8	1.2	2	4.5	Phloem
Non_sig	Cla001007	0.713	0.434	0.037	3	2.3	5	11.3	Phloem
Non_sig	Cla001008	0.969	0.97	0.969	1	1	1	1	Unknown
Non_sig	Cla001009	0.969	0.97	0.969	1	1	1	1	Unknown
Non_sig	Cla001010	0.969	0.97	0.969	1	1	1	1	Unknown
Non_sig	Cla001011	0.955	0.629	0.561	0.6	0.7	1.2	1.5	RING
Non_sig	Cla001012	0.698	0.431	0.503	1.6	2.5	3.2	3.2	DNA
Non_sig	Cla001013	0.905	0.69	0.962	0.7	0.6	1.2	0.8	DNA
Non_sig	Cla001015	0.969	0.97	0.969	1	1	1	1	Unknown
Non_sig	Cla001016	0.955	0.782	0.901	0.6	0.7	0.9	0.5	Pentatricopeptide
Non_sig	Cla001017	0.586	0.345	0.503	2.9	4.6	5.4	5	Cc-nbs-lrr
Non_sig	Cla001018	0.578	0.206	0.326	5.9	8.4	10.6	10.3	Unknown
Non_sig	Cla001019	0.969	0.97	0.969	1	1	1	1	Thaumatin-like
Non_sig	Cla001020	0.774	0.583	0.933	4.6	4	2.9	4.6	Ras-related
Non_sig	Cla001021	0.969	0.97	0.969	1	1	1	1	Unknown
Non_sig	Cla001022	0.969	0.97	0.969	1	1	1	1	Unknown
Non_sig	Cla001023	0.969	0.97	0.969	1	1	1	1	Unknown
Non_sig	Cla001024	0.779	0.886	0.474	10.5	9.8	10.6	14.8	YTH
Non_sig	Cla001025	0.7	0.367	0.487	2.4	3.5	4.6	4.4	Tubulin-specific
Non_sig	Cla001026	0.957	0.607	0.854	1.9	1.9	2.9	2.4	Tubulin
Non_sig	Cla001027	0.969	0.97	0.969	1	1	1	1	Unknown
Non_sig	Cla001028	0.969	0.406	0.969	1	1	0.1	1	Unknown
Non_sig	Cla001029	0.407	0.376	0.407	0.1	1	1	1	Cytochrome
Non_sig	Cla001030	0.969	0.97	0.375	1	1	1	0.1	Unknown
Non_sig	Cla001031	0.969	0.97	0.969	1	1	1	1	Unknown
Non_sig	Cla001032	0.256	0.237	0.175	2.7	0.7	0.5	0.4	Armadillo/beta-catenin-like
Non_sig	Cla001033	0.969	0.97	0.969	1	1	1	1	Unknown
Non_sig	Cla001034	0.99	0.376	0.765	0.1	0.1	1	0.3	Unknown
Non_sig	Cla001035	0.969	0.97	0.969	1	1	1	1	Unknown
Non_sig	Cla001036	0.969	0.97	0.969	1	1	1	1	Unknown
Non_sig	Cla001037	0.892	0.782	0.82	0.6	0.8	0.9	0.4	Unknown
Non_sig	Cla001038	0.615	0.805	0.916	2.3	3.7	1.7	2.2	Unknown
Non_sig	Cla001039	0.504	0.063	0.016	3.2	5.4	9.5	13.5	Esterase/lipase/thioesterase
Non_sig	Cla001040	0.969	0.97	0.969	1	1	1	1	Zinc
Non_sig	Cla001041	0.386	0.145	0.287	23.2	31.1	32.6	32.7	LOC443587
Non_sig	Cla001042	0.771	0.451	0.116	18	20.9	21.7	10.4	Shikimate
Non_sig	Cla001043	0.969	0.97	0.969	1	1	1	1	Unknown
Non_sig	Cla001044	0.969	0.97	0.969	1	1	1	1	Unknown
Non_sig	Cla001045	0.325	0.238	0.133	2.9	6.1	0.6	0.3	Harpin-induced
Non_sig	Cla001046	0.969	0.97	0.969	1	1	1	1	Late
Non_sig	Cla001047	0.969	0.97	0.969	1	1	1	1	Unknown
Non_sig	Cla001048	0.567	0.866	0.484	0.2	0.8	0.1	1	Yellow-leaf-specific
Non_sig	Cla001049	0.728	0.565	0.778	0.6	1.1	0.1	1	Yellow-leaf-specific
Non_sig	Cla001050	0.99	0.445	0.62	0.1	0.1	0.8	0.5	Unknown
Non_sig	Cla001051	0.969	0.97	0.969	1	1	1	1	Unknown
Non_sig	Cla001052	0.969	0.97	0.969	1	1	1	1	Unknown
Non_sig	Cla001053	0.969	0.97	0.375	1	1	1	0.1	Histone
Non_sig	Cla001054	0.675	0.541	0.675	0.8	1.5	1.7	1.5	PLATZ
Non_sig	Cla001055	0.927	0.551	0.875	1.9	2.2	3.1	1.7	RecQ-mediated
Non_sig	Cla001056	0.873	0.096	0.755	12.6	12.5	21.4	15	Magnesium
Non_sig	Cla001058	0.375	0.406	0.969	1	0.1	0.1	1	Unknown
Non_sig	Cla001059	0.458	0.974	0.014	3.6	2	3.5	14.5	RING
Non_sig	Cla001060	0.895	0.936	0.538	0.5	0.4	0.4	1.4	Ubiquitin-conjugating
Non_sig	Cla001061	0.178	0.695	0.16	4	1.1	2.8	1	Unknown
Non_sig	Cla001062	0.716	0.813	0.819	3.1	2.4	2.4	3.9	Altered
Non_sig	Cla001063	0.969	0.97	0.969	1	1	1	1	Gypsy-like
Non_sig	Cla001064	0.952	0.676	0.941	2.3	2.3	1.4	2.6	Transmembrane
Non_sig	Cla001065	0.969	0.97	0.969	1	1	1	1	Unknown
Non_sig	Cla001066	0.969	0.97	0.969	1	1	1	1	Unknown
Non_sig	Cla001067	0.657	0.59	0.863	0.4	0.1	1	0.6	BZIP
Non_sig	Cla001069	0.843	0.866	0.416	0.2	0.1	0.1	1.2	Retrotransposon
Non_sig	Cla001070	0.738	0.922	0.738	0.4	0.8	0.3	0.8	Alpha/beta
Non_sig	Cla001072	0.969	0.97	0.969	1	1	1	1	Unknown
Non_sig	Cla001073	0.969	0.97	0.969	1	1	1	1	Unknown
Non_sig	Cla001074	0.969	0.97	0.969	1	1	1	1	Unknown
Non_sig	Cla001075	0.527	0.979	0.682	11.3	15.3	10.6	10	Acetolactate
Non_sig	Cla001076	0.834	0.409	0.282	2	1.7	0.6	0.4	Ribulose
Non_sig	Cla001077	0.969	0.97	0.969	1	1	1	1	Unknown
Non_sig	Cla001078	0.407	0.991	0.407	0.1	1	0.1	1	Unknown
Non_sig	Cla001079	0.969	0.97	0.969	1	1	1	1	Unknown
Non_sig	Cla001080	0.969	0.97	0.589	1	1	1	0.4	Polygalacturonase
Non_sig	Cla001081	0.969	0.97	0.969	1	1	1	1	Unknown
Non_sig	Cla001082	0.99	0.376	0.407	0.1	0.1	1	1	Unknown
Non_sig	Cla001083	0.969	0.97	0.969	1	1	1	1	Unknown
Non_sig	Cla001084	0.969	0.97	0.969	1	1	1	1	Peroxidase
Non_sig	Cla001085	0.969	0.97	0.969	1	1	1	1	Unknown
Non_sig	Cla001086	0.969	0.406	0.375	1	1	0.1	0.1	Unknown
Non_sig	Cla001087	0.969	0.97	0.969	1	1	1	1	Unknown
Non_sig	Cla001088	0.375	0.97	0.969	1	0.1	1	1	Late
Non_sig	Cla001090	0.843	0.366	0.592	3	3.7	5.4	4.7	N-carbamoylputrescine
Non_sig	Cla001091	0.702	0.427	0.493	1.3	2.1	2.8	2.8	N-carbamoylputrescine
Non_sig	Cla001092	0.655	0.263	0.276	2.9	4.3	6	6.5	N-carbamoylputrescine
Non_sig	Cla001093	0.969	0.97	0.969	1	1	1	1	Unknown
Non_sig	Cla001094	0.998	0.361	0.161	3.6	3.8	6.2	8.9	Calpain-2
Non_sig	Cla001096	0.969	0.97	0.969	1	1	1	1	Unknown
Non_sig	Cla001097	0.765	0.284	0.879	2.4	1.9	0.5	2.2	Ferredoxin
Non_sig	Cla001098	0.015	0.084	0.176	19.6	7.7	9.5	12.8	Ribosomal
Non_sig	Cla001099	0.454	0.105	0.038	16.8	22.6	26.3	32.8	Copper-translocating
Non_sig	Cla001100	0.913	0.969	0.913	1.1	1	1.1	1	Heavy
Non_sig	Cla001101	0.842	0.902	0.983	0.3	0.5	0.2	0.3	Unknown
Non_sig	Cla001102	0.638	0.396	0.756	22.5	27.2	16.2	26	Potassium
Non_sig	Cla001103	0.978	0.439	0.249	9.1	9.5	12.1	15.5	30S
Non_sig	Cla001104	0.979	0.464	0.257	18.6	19.5	13.6	13.1	Dentin
Non_sig	Cla001105	0.969	0.97	0.969	1	1	1	1	Unknown
Non_sig	Cla001106	0.958	0.247	0.446	1.7	1.9	4.4	3.6	Pentatricopeptide
Non_sig	Cla001107	0.751	0.187	0.028	5.7	7.2	10.6	16.7	Endoplasmic
Non_sig	Cla001108	0.765	0.376	0.99	0.1	0.3	1	0.1	Receptor
Non_sig	Cla001109	0.914	0.818	0.863	1.3	1.2	0.9	1.1	Unknown
Non_sig	Cla001110	0.84	0.737	0.968	0.8	0.6	0.4	0.9	Unknown
Non_sig	Cla001111	0.996	0.711	0.429	5.5	5.8	4.1	8.9	Vesicular
Non_sig	Cla001114	0.969	0.97	0.969	1	1	1	1	Unknown
Non_sig	Cla001115	0.526	0.088	0.166	7	10.1	14.3	13.9	Sugar
Non_sig	Cla001116	0.457	0.903	0.746	6.2	4.1	6.3	7.8	Transcription
Non_sig	Cla001117	0.786	0.062	0.087	35.9	35.6	51	54.7	Exportin-1
Non_sig	Cla001118	0.969	0.97	0.969	1	1	1	1	Unknown
Non_sig	Cla001119	0.969	0.97	0.969	1	1	1	1	Unknown
Non_sig	Cla001120	0.862	0.828	0.678	1.4	1.8	1.7	2.3	Dihydroneopterin
Non_sig	Cla001121	0.98	0.981	0.635	0.4	0.4	0.4	1	Unknown
Non_sig	Cla001122	0.375	0.97	0.969	1	0.1	1	1	Unknown
Non_sig	Cla001123	0.867	0.376	0.99	0.1	0.2	1	0.1	Unknown
Non_sig	Cla001124	0.963	0.965	0.747	1.4	1.4	1.4	2.1	(RAP
Non_sig	Cla001125	0.66	0.197	0.222	21.9	26.3	29.8	32.4	Serine/threonine-protein
Non_sig	Cla001126	0.973	0.743	0.582	2.2	2.4	2.8	3.7	Phosphatidic
Non_sig	Cla001127	0.894	0.549	0.834	2.8	3.3	4.2	3.5	Sphingosine-1-phosphate
Non_sig	Cla001128	0.969	0.97	0.969	1	1	1	1	Unknown
Non_sig	Cla001129	0.969	0.97	0.969	1	1	1	1	Unknown
Non_sig	Cla001130	0.969	0.97	0.969	1	1	1	1	Unknown
Non_sig	Cla001131	0.969	0.97	0.969	1	1	1	1	Transcription
Non_sig	Cla001132	0.969	0.97	0.969	1	1	1	1	Unknown
Non_sig	Cla001133	0.969	0.97	0.375	1	1	1	0.1	Unknown
Non_sig	Cla001134	0.969	0.97	0.969	1	1	1	1	Unknown
Non_sig	Cla001135	0.969	0.97	0.969	1	1	1	1	Unknown
Non_sig	Cla001136	0.969	0.97	0.969	1	1	1	1	Unknown
Non_sig	Cla001137	0.407	0.991	0.867	0.1	1	0.1	0.2	Unknown
Non_sig	Cla001138	0.63	0.915	0.852	1	1.9	1.1	0.8	Cytochrome
Non_sig	Cla001139	0.969	0.97	0.969	1	1	1	1	Bis(5&apos-adenosyl)-triphosphatase
Non_sig	Cla001141	0.375	0.406	0.725	1	0.1	0.1	0.6	AT5g06970/MOJ9_14
Non_sig	Cla001142	0.445	0.358	0.028	6.6	10.2	9.9	18.2	Ring
Non_sig	Cla001143	0.658	0.269	0.018	9.7	12.4	14.5	24.5	E3
Non_sig	Cla001144	0.993	0.561	0.962	3.1	3.3	4.5	3.4	Replication
Non_sig	Cla001145	0.976	0.715	0.84	2.3	2.5	3	2	Replication
Non_sig	Cla001146	0.984	0.123	0.158	5.7	6.1	1.4	2	Membrane
Non_sig	Cla001147	0.854	0.376	0.308	4.4	4.1	7.1	8.4	Pentatricopeptide
Non_sig	Cla001148	0.446	0.893	0.014	10.2	14.7	9.1	26	Hydroxymethylglutaryl-CoA
Non_sig	Cla001149	0.396	0.742	0.012	1.6	3.7	1	10.8	Phospholipase
Non_sig	Cla001151	0.969	0.97	0.969	1	1	1	1	Expansin-like
Non_sig	Cla001152	0.852	0.765	0.277	1	0.8	1.4	3.4	Unknown
Non_sig	Cla001153	0.81	0.702	0.897	1.3	1	1.9	1.6	Transcription
Non_sig	Cla001154	0.916	0.53	0.415	1.6	1.5	2.8	3.6	Histone
Non_sig	Cla001156	0.88	0.648	0.948	2.8	2.6	3.8	2.8	Unknown
Non_sig	Cla001157	0.973	0.915	0.722	3.3	3.4	3.4	2.6	Cu/Zn-superoxide
Non_sig	Cla001158	0.924	0.916	0.987	2.8	3.2	2.9	3	Superoxide
Non_sig	Cla001159	0.707	0.811	0.741	16.7	20	17.2	19.7	Chromosome
Non_sig	Cla001161	0.461	0.597	0.962	3.1	5.5	1.8	3.4	C4-dicarboxylate
Non_sig	Cla001162	0.769	0.617	0.562	1.5	1.1	0.7	0.7	Cell
Non_sig	Cla001165	0.91	0.688	0.349	3.3	3.8	4.2	6.5	Bile
Non_sig	Cla001166	0.916	0.7	0.377	2.1	2	1.3	0.7	Ycf49
Non_sig	Cla001167	0.991	0.256	0.76	3	3.2	6.2	4	ACT
Non_sig	Cla001168	0.565	0.862	0.145	1	2.1	1.2	4.6	NBS-LRR
Non_sig	Cla001169	0.9	0.161	0.308	4.9	5.6	9.9	9.1	Serine/threonine-protein
Non_sig	Cla001170	0.969	0.97	0.969	1	1	1	1	Unknown
Non_sig	Cla001171	0.561	0.887	0.117	6.3	9	5.5	13.9	Nucleoredoxin
Non_sig	Cla001172	0.99	0.991	0.407	0.1	0.1	0.1	1	Unknown
Non_sig	Cla001173	0.969	0.97	0.969	1	1	1	1	Unknown
Non_sig	Cla001174	0.969	0.97	0.969	1	1	1	1	Ty3-gypsy
Non_sig	Cla001175	0.518	0.406	0.447	1	0.3	0.1	0.2	Unknown
Non_sig	Cla001176	0.969	0.97	0.969	1	1	1	1	Unknown
Non_sig	Cla001177	0.969	0.97	0.969	1	1	1	1	Unknown
Non_sig	Cla001178	0.969	0.97	0.969	1	1	1	1	Unknown
Non_sig	Cla001179	0.974	0.709	0.831	0.7	0.7	0.3	0.5	Unknown
Non_sig	Cla001180	0.969	0.97	0.969	1	1	1	1	Unknown
Non_sig	Cla001181	0.849	0.923	0.501	10.2	11.7	10.1	14.2	Cytochrome
Non_sig	Cla001182	0.969	0.97	0.969	1	1	1	1	Unknown
Non_sig	Cla001183	0.969	0.97	0.969	1	1	1	1	VQ
Non_sig	Cla001184	0.407	0.376	0.99	0.1	1	1	0.1	Unknown
Non_sig	Cla001186	0.969	0.97	0.969	1	1	1	1	Unknown
Non_sig	Cla001187	0.872	0.984	0.247	0.3	0.2	0.3	2.2	Unknown
Non_sig	Cla001188	0.969	0.97	0.375	1	1	1	0.1	Unknown
Non_sig	Cla001191	0.969	0.97	0.969	1	1	1	1	Unknown
Non_sig	Cla001192	0.375	0.406	0.375	1	0.1	0.1	0.1	Unknown
Non_sig	Cla001193	0.969	0.97	0.969	1	1	1	1	Glucose-6-phosphate
Non_sig	Cla001195	0.969	0.97	0.969	1	1	1	1	Unknown
Non_sig	Cla001196	0.99	0.46	0.873	12.8	13.6	16	12.7	Voltage-gated
Non_sig	Cla001197	0.969	0.97	0.375	1	1	1	0.1	Unknown
Non_sig	Cla001198	0.969	0.97	0.969	1	1	1	1	Unknown
Non_sig	Cla001200	0.969	0.97	0.969	1	1	1	1	Unknown
Non_sig	Cla001201	0.969	0.97	0.969	1	1	1	1	Unknown
Non_sig	Cla001202	0.923	0.764	0.739	0.3	0.4	0.1	0.1	Unknown
Non_sig	Cla001203	0.639	0.415	0.494	0.6	1.3	1.8	1.7	Protein
Non_sig	Cla001204	0.976	0.546	0.101	0.6	0.6	1.4	4.4	3-hydroxy-3-methylglutaryl
Non_sig	Cla001205	0.407	0.376	0.407	0.1	1	1	1	Photosystem
Non_sig	Cla001206	0.969	0.97	0.969	1	1	1	1	Unknown
Non_sig	Cla001208	0.969	0.97	0.969	1	1	1	1	Unknown
Non_sig	Cla001209	0.969	0.97	0.969	1	1	1	1	Unknown
Non_sig	Cla001210	0.969	0.97	0.969	1	1	1	1	Proliferating
Non_sig	Cla001211	0.969	0.97	0.969	1	1	1	1	Unknown
Non_sig	Cla001212	0.969	0.97	0.969	1	1	1	1	CLAVATA3/ESR
Non_sig	Cla001213	0.375	0.971	0.969	1	0.1	0.9	1	Unknown
Non_sig	Cla001214	0.407	0.991	0.99	0.1	1	0.1	0.1	Unknown
Non_sig	Cla001215	0.969	0.97	0.969	1	1	1	1	Unknown
Non_sig	Cla001216	0.765	0.753	0.609	6.3	5.6	7.1	4.9	Adenosine
Non_sig	Cla001217	0.923	0.887	0.772	0.3	0.4	0.4	0.6	Glycosyltransferase
Non_sig	Cla001218	0.397	0.357	0.163	17.9	24.6	22.7	28.7	Phosphoribosyltransferase
Non_sig	Cla001220	0.873	0.601	0.813	1.8	1.6	2.8	2.4	Unknown
Non_sig	Cla001221	0.912	0.678	0.829	1	0.9	1.6	1.4	Unknown
Non_sig	Cla001223	0.314	0.85	0.764	11.3	17.5	11.6	10.5	Calmodulin-binding
Non_sig	Cla001224	0.88	0.651	0.34	6	6.9	7.3	10.3	Beta-amylase
Non_sig	Cla001225	0.786	0.507	0.091	2.4	3.2	3.9	8.2	Os02g0225300
Non_sig	Cla001226	0.961	0.723	0.473	11.4	12.3	12.5	15.9	Myc
Non_sig	Cla001227	0.842	0.887	0.709	0.3	0.5	0.4	0.7	Gibberellin
Non_sig	Cla001228	0.697	0.901	0.767	2.6	1.9	2.2	3.5	ROP
Non_sig	Cla001229	0.663	0.667	0.722	1.9	3	2.7	2.8	Unknown
Non_sig	Cla001230	0.407	0.376	0.407	0.1	1	1	1	Legumin-like
Non_sig	Cla001231	0.886	0.812	0.657	0.4	0.3	0.2	0.1	Receptor-like
Non_sig	Cla001233	0.566	0.253	0.089	2	3.5	4.8	7.5	Signal
Non_sig	Cla001234	0.373	0.357	0.958	13.9	10.2	8.9	14.4	Glycerol-3-phosphate
Non_sig	Cla001235	0.983	0.011	0.029	27.2	28.6	10.6	14.3	Cytochrome
Non_sig	Cla001236	0.989	0.479	0.479	2.3	2.4	3.9	4.3	Origin
Non_sig	Cla001239	0.892	0.727	0.436	0.6	0.8	1	1.9	ARID/BRIGHT
Non_sig	Cla001240	0.969	0.97	0.969	1	1	1	1	Multidrug
Non_sig	Cla001241	0.769	0.678	0.962	1.5	1.1	2.2	1.5	Pentatricopeptide
Non_sig	Cla001242	0.675	0.65	0.114	3.7	5.2	4.8	9.9	Transmembrane
Non_sig	Cla001243	0.82	0.771	0.891	0.6	0.4	0.3	0.8	HMG-I
Non_sig	Cla001244	0.969	0.97	0.969	1	1	1	1	Leucine-rich
Non_sig	Cla001245	0.82	0.841	0.535	0.6	0.4	0.8	0.1	Unknown
Non_sig	Cla001246	0.99	0.376	0.867	0.1	0.1	1	0.2	Pathogenesis-related
Non_sig	Cla001247	0.375	0.406	0.375	1	0.1	0.1	0.1	Leucine-rich
Non_sig	Cla001248	0.868	0.36	0.968	10.4	11.8	14.3	10.8	Unknown
Non_sig	Cla001249	0.99	0.991	0.99	0.1	0.1	0.1	0.1	Unknown
Non_sig	Cla001251	0.387	0.601	0.926	24.9	33.1	20.2	27	Squalene
Non_sig	Cla001252	0.969	0.97	0.969	1	1	1	1	Unknown
Non_sig	Cla001253	0.404	0.284	0.984	2.6	1.1	0.6	2.7	Unknown
Non_sig	Cla001255	0.99	0.844	0.765	0.1	0.1	0.2	0.3	Unknown
Non_sig	Cla001256	0.375	0.559	0.375	1	0.1	0.3	0.1	Unknown
Non_sig	Cla001257	0.407	0.376	0.99	0.1	1	1	0.1	Unknown
Non_sig	Cla001258	0.463	0.667	0.984	2.6	4.8	3.5	2.7	MtN19-like
Non_sig	Cla001260	0.867	0.991	0.867	0.1	0.2	0.1	0.2	Unknown
Non_sig	Cla001261	0.969	0.97	0.969	1	1	1	1	Unknown
Non_sig	Cla001262	0.969	0.97	0.969	1	1	1	1	Unknown
Non_sig	Cla001263	0.863	0.512	0.585	1.3	1.1	0.4	0.6	Abhydrolase
Non_sig	Cla001264	0.969	0.97	0.969	1	1	1	1	Unknown
Non_sig	Cla001265	0.937	0.821	0.937	0.4	0.5	0.6	0.5	Unknown
Non_sig	Cla001266	0.375	0.97	0.375	1	0.1	1	0.1	Unknown
Non_sig	Cla001267	0.969	0.97	0.969	1	1	1	1	Unknown
Non_sig	Cla001268	0.969	0.97	0.969	1	1	1	1	class
Non_sig	Cla001270	0.969	0.406	0.375	1	1	0.1	0.1	Unknown
Non_sig	Cla001271	0.969	0.97	0.969	1	1	1	1	Unknown
Non_sig	Cla001272	0.969	0.97	0.969	1	1	1	1	Unknown
Non_sig	Cla001273	0.407	0.376	0.407	0.1	1	1	1	Unknown
Non_sig	Cla001274	0.71	0.764	0.983	0.3	0.7	0.1	0.3	Unknown
Non_sig	Cla001275	0.983	0.764	0.872	0.3	0.3	0.1	0.2	Unknown
Non_sig	Cla001276	0.969	0.97	0.375	1	1	1	0.1	Unknown
Non_sig	Cla001277	0.969	0.97	0.969	1	1	1	1	Unknown
Non_sig	Cla001278	0.407	0.991	0.407	0.1	1	0.1	1	Unknown
Non_sig	Cla001279	0.886	0.505	0.738	0.4	0.3	1.2	0.8	Unknown
Non_sig	Cla001280	0.969	0.97	0.969	1	1	1	1	Unknown
Non_sig	Cla001281	0.903	0.703	0.737	0.2	0.3	0.5	0.5	Unknown
Non_sig	Cla001282	0.969	0.97	0.969	1	1	1	1	Unknown
Non_sig	Cla001283	0.649	0.75	0.387	15.9	19.6	13.4	12.1	Microtubule-associated
Non_sig	Cla001284	0.969	0.97	0.969	1	1	1	1	Unknown
Non_sig	Cla001285	0.867	0.991	0.99	0.1	0.2	0.1	0.1	Glycosyltransferase
Non_sig	Cla001286	0.454	0.126	0.455	10.6	7.9	4.3	7.9	Protein
Non_sig	Cla001287	0.969	0.862	0.925	1	1	1.2	1.2	Unknown
Non_sig	Cla001288	0.969	0.97	0.969	1	1	1	1	Unknown
Non_sig	Cla001289	0.738	0.131	0.201	2.7	2.1	0.1	0.5	Unknown
Non_sig	Cla001291	0.983	0.984	0.739	0.3	0.3	0.3	0.1	Unknown
Non_sig	Cla001292	0.969	0.97	0.969	1	1	1	1	Unknown
Non_sig	Cla001294	0.867	0.844	0.99	0.1	0.2	0.2	0.1	Unknown
Non_sig	Cla001295	0.407	0.991	0.867	0.1	1	0.1	0.2	Unknown
Non_sig	Cla001296	0.941	0.799	0.785	5.8	6.4	4.7	5.2	Transcription
Non_sig	Cla001297	0.884	0.865	0.716	1.1	1.4	1.3	1.8	Conserved
Non_sig	Cla001298	0.969	0.97	0.969	1	1	1	1	2-oxoglutarate-dependent
Non_sig	Cla001299	0.937	0.981	0.98	0.4	0.5	0.4	0.4	Unknown
Non_sig	Cla001300	0.677	0.364	0.995	9.3	11.8	13	9.8	FolD
Non_sig	Cla001302	0.969	0.483	0.658	1	1	0.2	0.5	Unknown
Non_sig	Cla001303	0.728	0.727	0.778	0.6	1.1	1	1	Hydroxycinnamoyl
Non_sig	Cla001304	0.969	0.97	0.375	1	1	1	0.1	Gag/pol
Non_sig	Cla001305	0.82	0.82	0.52	1.9	2.5	1.4	0.9	Regulator
Non_sig	Cla001307	0.847	0.249	0.105	3.1	3.8	6.4	9.1	Intracellular
Non_sig	Cla001308	0.867	0.991	0.99	0.1	0.2	0.1	0.1	Intracellular
Non_sig	Cla001309	0.969	0.97	0.969	1	1	1	1	Ty3-gypsy
Non_sig	Cla001310	0.99	0.991	0.99	0.1	0.1	0.1	0.1	Gypsy-like
Non_sig	Cla001311	0.375	0.97	0.375	1	0.1	1	0.1	Unknown
Non_sig	Cla001312	0.969	0.97	0.969	1	1	1	1	Unknown
Non_sig	Cla001313	0.471	0.178	0.045	2.2	4.2	5.8	9.3	Potassium
Non_sig	Cla001314	0.717	0.446	0.471	2.2	1.6	0.8	1	Periplasmic
Non_sig	Cla001315	0.847	0.901	0.651	0.9	0.7	0.7	1.7	GEX1
Non_sig	Cla001316	0.969	0.97	0.969	1	1	1	1	Rapid
Non_sig	Cla001317	0.501	0.763	0.043	15.8	20.9	13.4	6.8	Homology
Non_sig	Cla001318	0.941	0.361	0.34	2.3	2.6	4.5	5.1	Alkylated
Non_sig	Cla001319	0.843	0.866	0.448	0.2	0.1	0.1	1.1	Receptor-like
Non_sig	Cla001320	0.673	0.638	0.122	0.2	0.6	0.6	3.1	Receptor-like
Non_sig	Cla001322	0.375	0.97	0.447	1	0.1	1	0.2	Receptor-like
Non_sig	Cla001323	0.969	0.97	0.969	1	1	1	1	Receptor-like
Non_sig	Cla001324	0.99	0.376	0.407	0.1	0.1	1	1	Receptor-like
Non_sig	Cla001325	0.969	0.97	0.969	1	1	1	1	Cysteine-rich
Non_sig	Cla001327	0.973	0.759	0.638	0.9	1	0.5	0.4	Unknown
Non_sig	Cla001328	0.817	0.979	0.895	0.5	0.8	0.5	0.4	Os04g0690100
Non_sig	Cla001329	0.775	0.132	0.029	17.4	20.2	26.2	34.6	Lateral
Non_sig	Cla001330	0.86	0.979	0.86	1.2	1	1.1	1	Pentatricopeptide
Non_sig	Cla001331	0.813	0.626	0.064	10	9.5	11.7	21.2	BHLH
Non_sig	Cla001332	0.737	0.085	0.124	8.5	7.6	2.5	3.5	Flavoprotein
Non_sig	Cla001334	0.774	0.216	0.152	8	9.7	3.5	15.6	Receptor
Non_sig	Cla001335	0.902	0.791	0.794	0.7	0.9	1	1.1	Zinc
Non_sig	Cla001336	0.892	0.937	0.464	7.8	7.7	7.1	5.5	Uncharacterized
Non_sig	Cla001338	0.386	0.784	0.962	1.5	3.6	1	1.5	Equilibrative
Non_sig	Cla001339	0.738	0.524	0.533	8.6	10.6	10.9	12	B160
Non_sig	Cla001340	0.877	0.373	0.621	6.2	6	9.3	8.5	Uncharacterized
Non_sig	Cla001341	0.737	0.149	0.226	0.2	0.5	2.5	2.1	MYB
Non_sig	Cla001342	0.765	0.497	0.206	6.9	8.5	9.2	13.1	3&apos(2&apos)
Non_sig	Cla001343	0.99	0.991	0.023	0.1	0.1	0.1	5.8	Unknown
Non_sig	Cla001344	0.877	0.816	0.418	6.8	7.8	7.3	4.4	Unknown
Non_sig	Cla001346	0.091	0.718	0.018	29.3	18.9	25.2	53.1	Membrane
Non_sig	Cla001347	0.126	0.066	0.061	19.6	11.9	9	10.2	Auxin
Non_sig	Cla001348	0.879	0.62	0.591	0.5	0.7	0.1	0.1	Unknown
Non_sig	Cla001352	0.969	0.406	0.969	1	1	0.1	1	Unknown
Non_sig	Cla001353	0.843	0.873	0.673	0.2	0.1	0.3	0.6	Unknown
Non_sig	Cla001354	0.843	0.987	0.567	0.2	0.1	0.2	0.8	Unknown
Non_sig	Cla001355	0.969	0.97	0.658	1	1	1	0.5	NADH
Non_sig	Cla001356	0.921	0.809	0.897	4.8	5.4	5.3	5.5	Nuclease
Non_sig	Cla001357	0.407	0.376	0.99	0.1	1	1	0.1	Quinone
Non_sig	Cla001359	0.767	0.323	0.462	3.7	4.8	6.6	6.3	Pre-mRNA-splicing
Non_sig	Cla001360	0.983	0.764	0.872	0.3	0.3	0.1	0.2	Unknown
Non_sig	Cla001361	0.902	0.796	0.974	0.7	0.9	0.4	0.7	Unknown
Non_sig	Cla001362	0.715	0.186	0.269	7	8.9	12.3	12.4	Pre-mRNA-splicing
Non_sig	Cla001365	0.969	0.97	0.969	1	1	1	1	Unknown
Non_sig	Cla001366	0.918	0.198	0.33	6.9	7.7	12	11.6	B3
Non_sig	Cla001367	0.535	0.074	0.172	8.2	11.5	16.4	15.5	B3
Non_sig	Cla001368	0.69	0.893	0.987	4.4	3.5	3.8	4.6	Anaphase
Non_sig	Cla001369	0.779	0.438	0.074	8.2	9.9	11.1	18.1	Receptor-like
Non_sig	Cla001370	0.661	0.62	0.591	0.5	1.1	0.1	0.1	Unknown
Non_sig	Cla001371	0.336	0.164	0.162	2.6	0.9	0.2	0.3	Unknown
Non_sig	Cla001373	0.908	0.653	0.613	0.8	0.7	0.3	0.3	Dof
Non_sig	Cla001374	0.969	0.97	0.969	1	1	1	1	Unknown
Non_sig	Cla001375	0.969	0.97	0.969	1	1	1	1	Unknown
Non_sig	Cla001376	0.969	0.97	0.969	1	1	1	1	Unknown
Non_sig	Cla001377	0.798	0.917	0.737	1.1	0.8	0.9	0.7	Unknown
Non_sig	Cla001378	0.869	0.986	0.904	8.4	9.6	7.9	9.4	ATP
Non_sig	Cla001380	0.969	0.97	0.969	1	1	1	1	Zinc
Non_sig	Cla001381	0.744	0.837	0.781	6.1	7.7	6.5	7.5	(RAP
Non_sig	Cla001382	0.737	0.866	0.986	0.2	0.5	0.1	0.2	Unknown
Non_sig	Cla001383	0.375	0.97	0.969	1	0.1	1	1	Unknown
Non_sig	Cla001384	0.969	0.97	0.969	1	1	1	1	Unknown
Non_sig	Cla001385	0.969	0.97	0.969	1	1	1	1	Phi-1
Non_sig	Cla001386	0.969	0.97	0.969	1	1	1	1	Unknown
Non_sig	Cla001387	0.969	0.97	0.969	1	1	1	1	Phi-1
Non_sig	Cla001388	0.969	0.97	0.969	1	1	1	1	Unknown
Non_sig	Cla001389	0.754	0.133	0.333	5.8	7.3	11.6	10.1	Protein
Non_sig	Cla001390	0.863	0.812	0.937	0.4	0.6	0.2	0.5	Unknown
Non_sig	Cla001391	0.506	0.088	0.195	9	12.7	17	16.2	Protein
Non_sig	Cla001392	0.843	0.78	0.813	0.2	0.1	0.4	0.4	Dirigent-like
Non_sig	Cla001393	0.969	0.97	0.969	1	1	1	1	Unknown
Non_sig	Cla001394	0.969	0.97	0.969	1	1	1	1	Unknown
Non_sig	Cla001395	0.856	0.513	0.679	1.1	0.9	2.2	1.9	Unknown
Non_sig	Cla001396	0.407	0.376	0.99	0.1	1	1	0.1	Dirigent-like
Non_sig	Cla001397	0.969	0.97	0.969	1	1	1	1	Unknown
Non_sig	Cla001398	0.87	0.896	0.775	1.6	1.4	1.3	1.2	Pentatricopeptide
Non_sig	Cla001399	0.969	0.97	0.969	1	1	1	1	Transcriptional
Non_sig	Cla001400	0.785	0.97	0.912	1	1.5	1	0.9	F-box
Non_sig	Cla001401	0.969	0.97	0.969	1	1	1	1	Retrotransposon
Non_sig	Cla001402	0.837	0.109	0.04	13.4	15.3	22	27.7	Vacuolar
Non_sig	Cla001403	0.952	0.405	0.036	6.5	7.1	9.4	17.4	Dual
Non_sig	Cla001406	0.895	0.712	0.576	0.5	0.4	0.9	1.3	Unknown
Non_sig	Cla001407	0.517	0.178	0.4	30.1	37.3	39.5	39	Signal
Non_sig	Cla001408	0.977	0.559	0.518	1	1.1	0.3	0.3	Glucan
Non_sig	Cla001411	0.84	0.566	0.76	0.8	0.6	0.2	1.3	Thymidine
Non_sig	Cla001412	0.519	0.452	0.482	7.8	5.8	4.8	5.6	RNA-binding
Non_sig	Cla001413	0.969	0.97	0.375	1	1	1	0.1	Unknown
Non_sig	Cla001414	0.978	0.126	0.346	8.4	9	15.2	13.4	Thioredoxin
Non_sig	Cla001415	0.969	0.97	0.969	1	1	1	1	Unknown
Non_sig	Cla001416	0.978	0.712	0.708	0.5	0.5	0.9	1	Poly(ADP-ribose)
Non_sig	Cla001417	0.962	0.975	0.658	0.7	0.8	0.7	1.4	Poly(ADP-ribose)
Non_sig	Cla001418	0.79	0.477	0.551	4.3	5.4	2.3	2.9	Unknown
Non_sig	Cla001419	0.506	0.828	0.815	1.4	2.9	1	1.1	Unknown
Non_sig	Cla001420	0.903	0.866	0.813	0.2	0.3	0.1	0.4	Unknown
Non_sig	Cla001421	0.969	0.634	0.375	1	1	0.4	0.1	Ulp1
Non_sig	Cla001422	0.969	0.97	0.969	1	1	1	1	Unknown
Non_sig	Cla001423	0.937	0.685	0.635	0.4	0.5	0.1	1	Unknown
Non_sig	Cla001424	0.843	0.448	0.843	0.2	0.1	1	0.1	Unknown
Non_sig	Cla001425	0.969	0.97	0.969	1	1	1	1	Unknown
Non_sig	Cla001426	0.407	0.376	0.99	0.1	1	1	0.1	Unknown
Non_sig	Cla001427	0.969	0.97	0.969	1	1	1	1	Unknown
Non_sig	Cla001428	0.969	0.97	0.969	1	1	1	1	Unknown
Non_sig	Cla001429	0.955	0.565	0.732	0.6	0.7	0.1	0.3	Unknown
Non_sig	Cla001430	0.969	0.97	0.969	1	1	1	1	Unknown
Non_sig	Cla001431	0.969	0.97	0.969	1	1	1	1	Alcohol
Non_sig	Cla001432	0.99	0.844	0.99	0.1	0.1	0.2	0.1	Cysteine-rich
Non_sig	Cla001433	0.969	0.97	0.969	1	1	1	1	Unknown
Non_sig	Cla001435	0.879	0.025	0.065	2.5	2.3	10.1	9.1	Alcohol
Non_sig	Cla001436	0.969	0.97	0.969	1	1	1	1	Unknown
Non_sig	Cla001437	0.969	0.97	0.375	1	1	1	0.1	Unknown
Non_sig	Cla001438	0.969	0.97	0.969	1	1	1	1	Unknown
Non_sig	Cla001439	0.612	0.798	0.285	20.5	25.2	17.9	15.1	Phloem
Non_sig	Cla001440	0.139	0.014	0.015	58.5	46.3	32.7	37.3	Phloem
Non_sig	Cla001441	0.969	0.97	0.969	1	1	1	1	Polygalacturonase
Non_sig	Cla001442	0.625	0.36	0.029	50.1	48	39.1	32.5	Cysteine
Non_sig	Cla001443	0.969	0.97	0.969	1	1	1	1	Unknown
Non_sig	Cla001444	0.969	0.97	0.969	1	1	1	1	MYB
Non_sig	Cla001445	0.969	0.97	0.375	1	1	1	0.1	Os02g0504100
Non_sig	Cla001446	0.969	0.97	0.375	1	1	1	0.1	Unknown
Non_sig	Cla001447	0.969	0.97	0.969	1	1	1	1	CACTA
Non_sig	Cla001448	0.945	0.98	0.443	3.1	3.1	3	5.6	Os02g0504100
Non_sig	Cla001449	0.969	0.97	0.969	1	1	1	1	Unknown
Non_sig	Cla001450	0.969	0.97	0.969	1	1	1	1	Unknown
Non_sig	Cla001451	0.969	0.97	0.969	1	1	1	1	Unknown
Non_sig	Cla001452	0.969	0.97	0.969	1	1	1	1	Unknown
Non_sig	Cla001453	0.99	0.991	0.99	0.1	0.1	0.1	0.1	Unknown
Non_sig	Cla001454	0.816	0.566	0.521	14.8	17	17.2	19.5	Acetyl-CoA
Non_sig	Cla001455	0.929	0.795	0.563	18.5	19	19.1	23.4	Acetyl-CoA
Non_sig	Cla001456	0.678	0.559	0.663	6.9	9	8.8	5.7	Tyrosyl-tRNA
Non_sig	Cla001457	0.708	0.859	0.855	5	6.6	5.3	4.7	Tyrosyl-tRNA
Non_sig	Cla001458	0.375	0.559	0.518	1	0.1	0.3	0.3	Unknown
Non_sig	Cla001459	0.615	0.846	0.64	2.3	3.7	2.6	3.6	Pentatricopeptide
Non_sig	Cla001460	0.843	0.866	0.843	0.2	0.1	0.1	0.1	Unknown
Non_sig	Cla001461	0.528	0.558	0.636	1.6	3.1	2.7	2.7	Unknown
Non_sig	Cla001462	0.969	0.97	0.969	1	1	1	1	Unknown
Non_sig	Cla001463	0.915	0.604	0.747	1.4	1.3	2.3	2.1	SET
Non_sig	Cla001464	0.99	0.376	0.99	0.1	0.1	1	0.1	Ty3-gypsy
Non_sig	Cla001465	0.96	0.684	0.579	1.6	1.6	2.3	2.9	Unknown
Non_sig	Cla001466	0.718	0.831	0.792	1.5	1	1.8	2.1	Unknown
Non_sig	Cla001467	0.969	0.97	0.969	1	1	1	1	Unknown
Non_sig	Cla001468	0.923	0.887	0.709	0.3	0.4	0.4	0.7	Zinc
Non_sig	Cla001470	0.938	0.743	0.607	2.2	2.5	2.8	3.6	Ribosomal
Non_sig	Cla001471	0.969	0.97	0.969	1	1	1	1	Unknown
Non_sig	Cla001472	0.969	0.406	0.375	1	1	0.1	0.1	Ty3-gypsy
Non_sig	Cla001473	0.969	0.97	0.969	1	1	1	1	Unknown
Non_sig	Cla001474	0.962	0.954	0.962	0.7	0.8	0.6	0.8	Unknown
Non_sig	Cla001475	0.494	0.458	0.474	25.8	22.4	19.6	32.9	Mitochondrial
Non_sig	Cla001476	0.689	0.341	0.767	4	5.5	1.6	3.4	Acetyl-CoA
Non_sig	Cla001477	0.668	0.745	0.332	17.1	20.8	18.1	24.5	Sister
Non_sig	Cla001478	0.797	0.922	0.887	0.4	0.7	0.3	0.3	Unknown
Non_sig	Cla001479	0.735	0.792	0.51	3	4.1	3.5	5.1	Cohesin
Non_sig	Cla001480	0.623	0.417	0.067	1.2	2.2	2.7	6.5	Sh4
Non_sig	Cla001481	0.775	0.313	0.28	1.6	1.2	0.2	0.2	Receptor-like
Non_sig	Cla001483	0.977	0.071	0.829	1	1.1	5.4	1.4	Unknown
Non_sig	Cla001484	0.907	0.175	0.191	7.4	8.3	2.8	3.4	Chromosome
Non_sig	Cla001485	0.477	0.247	0.132	26.5	33.7	33.9	40.7	RNA
Non_sig	Cla001486	0.98	0.896	0.863	0.4	0.4	0.5	0.6	Unknown
Non_sig	Cla001487	0.842	0.805	0.419	0.3	0.5	0.5	1.4	Protein
Non_sig	Cla001488	0.903	0.743	0.632	2.2	2.6	2.8	3.5	Major
Non_sig	Cla001490	0.969	0.97	0.969	1	1	1	1	Receptor-like
Non_sig	Cla001492	0.738	0.217	0.075	13.9	16.6	20.2	26.3	Hydroxyproline-rich
Non_sig	Cla001494	0.974	0.644	0.547	0.7	0.7	1.3	1.7	Unknown
Non_sig	Cla001496	0.969	0.97	0.969	1	1	1	1	Bidirectional
Non_sig	Cla001498	0.407	0.376	0.407	0.1	1	1	1	Glutaredoxin
Non_sig	Cla001499	0.962	0.878	0.669	0.7	0.8	0.5	0.3	Pollen
Non_sig	Cla001500	0.49	0.161	0.017	4.9	7.7	9.9	16.6	SAUR-like
Non_sig	Cla001501	0.2	0.884	0.626	63	82.5	58.2	72.4	GYF
Non_sig	Cla001506	0.907	0.306	0.384	17.1	18.8	22.5	23.8	Transcription
Non_sig	Cla001507	0.375	0.406	0.969	1	0.1	0.1	1	Unknown
Non_sig	Cla001508	0.969	0.97	0.969	1	1	1	1	Heavy-metal-associated
Non_sig	Cla001509	0.765	0.991	0.99	0.1	0.3	0.1	0.1	Unknown
Non_sig	Cla001510	0.407	0.19	0.087	0.1	1	1.9	3.4	DM280
Non_sig	Cla001511	0.795	0.22	0.492	9.4	8.8	14.8	13.3	Unknown
Non_sig	Cla001512	0.534	0.394	0.285	1.2	2.5	2.8	3.7	Proton
Non_sig	Cla001513	0.351	0.19	0.02	8	5	3.3	1.2	Unknown
Non_sig	Cla001515	0.969	0.97	0.969	1	1	1	1	Unknown
Non_sig	Cla001516	0.981	0.321	0.305	1.1	1.2	3	3.4	Fcf2
Non_sig	Cla001517	0.961	0.484	0.462	4.3	4.4	6.3	7.1	BZIP
Non_sig	Cla001518	0.775	0.794	0.764	1.6	1.2	2	2.3	DNA
Non_sig	Cla001519	0.876	0.765	0.79	1	1.3	1.4	0.7	Squamosa
Non_sig	Cla001520	0.969	0.97	0.969	1	1	1	1	Unknown
Non_sig	Cla001521	0.969	0.97	0.969	1	1	1	1	Unknown
Non_sig	Cla001522	0.969	0.97	0.375	1	1	1	0.1	Unknown
Non_sig	Cla001523	0.447	0.406	0.375	1	0.2	0.1	0.1	Unknown
Non_sig	Cla001524	0.68	0.016	0.064	6.4	8.4	17.6	15.7	cDNA
Non_sig	Cla001525	0.407	0.376	0.99	0.1	1	1	0.1	Unknown
Non_sig	Cla001526	0.969	0.97	0.969	1	1	1	1	Unknown
Non_sig	Cla001527	0.969	0.97	0.969	1	1	1	1	Unknown
Non_sig	Cla001528	0.969	0.97	0.375	1	1	1	0.1	Unknown
Non_sig	Cla001529	0.969	0.97	0.969	1	1	1	1	Unknown
Non_sig	Cla001530	0.333	0.162	0.012	5.5	9.7	10.7	18.4	Sec1-4
Non_sig	Cla001531	0.558	0.258	0.073	4.2	6.4	7.8	11.8	Protein
Non_sig	Cla001532	0.867	0.991	0.99	0.1	0.2	0.1	0.1	Reverse
Non_sig	Cla001533	0.969	0.97	0.969	1	1	1	1	Unknown
Non_sig	Cla001534	0.969	0.483	0.658	1	1	0.2	0.5	MtN21
Non_sig	Cla001535	0.903	0.866	0.903	0.2	0.3	0.1	0.3	Unknown
Non_sig	Cla001536	0.407	0.376	0.99	0.1	1	1	0.1	Unknown
Non_sig	Cla001537	0.969	0.97	0.969	1	1	1	1	Unknown
Non_sig	Cla001539	0.969	0.97	0.969	1	1	1	1	Unknown
Non_sig	Cla001540	0.567	0.825	0.847	22	27.4	22.3	24.6	Neuroblastoma-amplified
Non_sig	Cla001541	0.853	0.836	0.638	5.7	6.7	6.1	7.8	Neuroblastoma-amplified
Non_sig	Cla001542	0.611	0.856	0.947	3.7	5.5	4	4.1	Cytoplasmic
Non_sig	Cla001543	0.843	0.783	0.683	5.3	6.3	4.2	4.3	Cytoplasmic
Non_sig	Cla001544	0.916	0.804	0.637	1.7	1.6	1.2	1	Unknown
Non_sig	Cla001545	0.8	0.794	0.627	1.6	2.2	1.1	0.9	Unknown
Non_sig	Cla001546	0.665	0.823	0.931	4.9	6.7	4	4.9	Cytoplasmic
Non_sig	Cla001547	0.969	0.97	0.969	1	1	1	1	Unknown
Non_sig	Cla001548	0.676	0.112	0.817	5.2	7	11.2	6.3	Plastid
Non_sig	Cla001549	0.868	0.668	0.91	0.9	1.2	1.5	0.8	Plastid
Non_sig	Cla001550	0.843	0.866	0.843	0.2	0.1	0.1	0.1	Unknown
Non_sig	Cla001551	0.752	0.37	0.73	5.1	6.5	8	4.3	Pentatricopeptide
Non_sig	Cla001552	0.969	0.97	0.969	1	1	1	1	Unknown
Non_sig	Cla001553	0.969	0.97	0.969	1	1	1	1	Unknown
Non_sig	Cla001554	0.447	0.476	0.422	0.8	2.2	1.9	2.3	Receptor
Non_sig	Cla001555	0.969	0.97	0.969	1	1	1	1	Unknown
Non_sig	Cla001556	0.529	0.446	0.99	13.5	17.9	16.9	14.2	U11/U12
Non_sig	Cla001557	0.833	0.906	0.955	0.6	0.9	0.7	0.7	Unknown
Non_sig	Cla001558	0.969	0.97	0.969	1	1	1	1	Germin-like
Non_sig	Cla001559	0.969	0.97	0.969	1	1	1	1	Unknown
Non_sig	Cla001560	0.969	0.97	0.969	1	1	1	1	Unknown
Non_sig	Cla001561	0.969	0.97	0.969	1	1	1	1	Unknown
Non_sig	Cla001562	0.937	0.896	0.78	0.4	0.5	0.5	0.2	Unknown
Non_sig	Cla001563	0.969	0.97	0.969	1	1	1	1	Unknown
Non_sig	Cla001564	0.97	0.901	0.638	0.9	0.9	0.7	0.4	Unknown
Non_sig	Cla001565	0.693	0.779	0.535	4.1	5.6	4.7	6.4	Circadian
Non_sig	Cla001566	0.969	0.406	0.518	1	1	0.1	0.3	Unknown
Non_sig	Cla001567	0.99	0.376	0.407	0.1	0.1	1	1	Unknown
Non_sig	Cla001568	0.969	0.97	0.969	1	1	1	1	Unknown
Non_sig	Cla001569	0.843	0.448	0.843	0.2	0.1	1	0.1	Unknown
Non_sig	Cla001570	0.969	0.97	0.375	1	1	1	0.1	Unknown
Non_sig	Cla001571	0.976	0.51	0.778	0.6	0.6	1.5	1	Unknown
Non_sig	Cla001572	0.969	0.97	0.969	1	1	1	1	Ty3-gypsy
Non_sig	Cla001573	0.969	0.97	0.969	1	1	1	1	Unknown
Non_sig	Cla001574	0.969	0.97	0.969	1	1	1	1	Unknown
Non_sig	Cla001575	0.843	0.866	0.903	0.2	0.1	0.1	0.3	Unknown
Non_sig	Cla001576	0.913	0.737	0.161	5.5	6.2	4.2	11.8	Glycosyltransferase
Non_sig	Cla001577	0.888	0.914	0.209	3.5	4.1	3.6	8.1	Unknown
Non_sig	Cla001578	0.969	0.97	0.969	1	1	1	1	Unknown
Non_sig	Cla001579	0.911	0.419	0.76	0.8	1	2.1	1.3	Unknown
Non_sig	Cla001580	0.969	0.97	0.969	1	1	1	1	Unknown
Non_sig	Cla001581	0.851	0.952	0.813	7.4	8.6	6.8	6.9	Unknown
Non_sig	Cla001582	0.686	0.844	0.765	0.1	0.4	0.2	0.3	Unknown
Non_sig	Cla001583	0.375	0.406	0.447	1	0.1	0.1	0.2	Receptor-like
Non_sig	Cla001584	0.969	0.97	0.969	1	1	1	1	Unknown
Non_sig	Cla001585	0.375	0.97	0.375	1	0.1	1	0.1	Ras-related
Non_sig	Cla001586	0.987	0.284	0.245	2.4	2.5	0.5	0.5	Rac-like
Non_sig	Cla001587	0.969	0.97	0.969	1	1	1	1	LOB
Non_sig	Cla001588	0.969	0.97	0.969	1	1	1	1	Core-2/I-branching
Non_sig	Cla001589	0.969	0.97	0.969	1	1	1	1	Unknown
Non_sig	Cla001590	0.679	0.872	0.615	1.4	2.3	1.6	2.5	Acid
Non_sig	Cla001591	0.855	0.767	0.786	1.9	2.4	2.4	2.6	Acid
Non_sig	Cla001592	0.969	0.97	0.969	1	1	1	1	Unknown
Non_sig	Cla001593	0.459	0.714	0.958	1.8	0.7	1.1	1.8	Early-responsive
Non_sig	Cla001594	0.375	0.97	0.375	1	0.1	1	0.1	Gag-protease
Non_sig	Cla001595	0.721	0.047	0.071	11.4	13.9	22	22.9	Nsfl1
Non_sig	Cla001596	0.976	0.586	0.833	0.6	0.6	1.3	0.9	RNA
Non_sig	Cla001597	0.969	0.97	0.969	1	1	1	1	Envelope-like
Non_sig	Cla001598	0.969	0.406	0.969	1	1	0.1	1	Unknown
Non_sig	Cla001599	0.969	0.97	0.969	1	1	1	1	Unknown
Non_sig	Cla001600	0.774	0.913	0.563	0.9	1.4	1	0.3	Unknown
Non_sig	Cla001601	0.986	0.866	0.843	0.2	0.2	0.1	0.1	Unknown
Non_sig	Cla001602	0.969	0.97	0.969	1	1	1	1	Unknown
Non_sig	Cla001603	0.937	0.777	0.442	1.2	1.4	1.6	0.3	Endo-1
Non_sig	Cla001604	0.627	0.125	0.036	32.7	38.8	44.1	54.7	NADH
Non_sig	Cla001605	0.938	0.036	0.294	25.7	26.6	41.1	35.6	ADP-RIBOSYLATION
Non_sig	Cla001606	0.867	0.844	0.867	0.1	0.2	0.2	0.2	Unknown
Non_sig	Cla001607	0.969	0.97	0.969	1	1	1	1	Unknown
Non_sig	Cla001608	0.407	0.376	0.99	0.1	1	1	0.1	LIM
Non_sig	Cla001609	0.88	0.553	0.379	4.1	4.8	5.7	7.4	Myosin
Non_sig	Cla001610	0.59	0.62	0.804	0.5	0.1	0.1	0.3	Unknown
Non_sig	Cla001612	0.99	0.739	0.867	0.1	0.1	0.3	0.2	Unknown
Non_sig	Cla001613	0.988	0.702	0.897	1.3	1.4	1.9	1.6	Ribosomal
Non_sig	Cla001614	0.741	0.116	0.251	5.4	6.9	11.4	10.4	Unknown
Non_sig	Cla001615	0.667	0.989	0.562	1.5	0.9	1.4	0.7	Tubulin
Non_sig	Cla001616	0.99	0.376	0.99	0.1	0.1	1	0.1	Unknown
Non_sig	Cla001617	0.362	0.891	0.912	36.7	47.4	33.7	37.8	Protein
Non_sig	Cla001618	0.378	0.663	0.664	8.8	13.6	10.2	11.3	1-phosphatidylinositol
Non_sig	Cla001619	0.135	0.354	0.448	45.9	64.7	52.5	56.4	Phosphatidylinositol
Non_sig	Cla001620	0.983	0.887	0.021	0.3	0.3	0.4	6.5	Isoflavone
Non_sig	Cla001621	0.377	0.844	0.99	0.1	1.1	0.2	0.1	Pathogenesis-related
Non_sig	Cla001622	0.969	0.97	0.969	1	1	1	1	Unknown
Non_sig	Cla001623	0.969	0.97	0.375	1	1	1	0.1	Pathogenesis-related
Non_sig	Cla001624	0.407	0.376	0.407	0.1	1	1	1	Pathogenesis-related
Non_sig	Cla001625	0.969	0.97	0.969	1	1	1	1	Pathogenesis
Non_sig	Cla001626	0.969	0.97	0.969	1	1	1	1	Pathogenesis
Non_sig	Cla001627	0.969	0.97	0.969	1	1	1	1	Pathogenesis
Non_sig	Cla001628	0.566	0.924	0.86	1.2	0.5	1	1	Pathogenesis-related
Non_sig	Cla001629	0.983	0.887	0.739	0.3	0.3	0.4	0.1	Pathogenesis-related
Non_sig	Cla001630	0.99	0.991	0.407	0.1	0.1	0.1	1	Pathogenesis-related
Non_sig	Cla001631	0.969	0.97	0.969	1	1	1	1	Pathogenesis-related
Non_sig	Cla001632	0.969	0.97	0.969	1	1	1	1	Unknown
Non_sig	Cla001633	0.898	0.917	0.988	1.3	1.6	1.4	1.4	RAR1
Non_sig	Cla001634	0.969	0.97	0.969	1	1	1	1	Unknown
Non_sig	Cla001635	0.969	0.97	0.969	1	1	1	1	Unknown
Non_sig	Cla001636	0.969	0.97	0.969	1	1	1	1	Unknown
Non_sig	Cla001637	0.99	0.991	0.99	0.1	0.1	0.1	0.1	Unknown
Non_sig	Cla001638	0.71	0.857	0.825	4	5.4	4.3	3.6	Pentatricopeptide
Non_sig	Cla001639	0.99	0.376	0.99	0.1	0.1	1	0.1	Gag/pol
Non_sig	Cla001641	0.969	0.97	0.969	1	1	1	1	Unknown
Non_sig	Cla001642	0.969	0.97	0.969	1	1	1	1	Unknown
Non_sig	Cla001643	0.731	0.693	0.56	6.3	8	7.4	9	Predicted
Non_sig	Cla001644	0.774	0.986	0.83	2.7	2.2	2.6	3.4	E3
Non_sig	Cla001645	0.899	0.918	0.899	2.1	2.5	2.2	2.5	Unknown
Non_sig	Cla001646	0.842	0.984	0.842	0.3	0.5	0.3	0.5	Unknown
Non_sig	Cla001647	0.963	0.728	0.441	5.8	6.3	6.7	9.2	Uncharacterized
Non_sig	Cla001648	0.969	0.97	0.375	1	1	1	0.1	Unknown
Non_sig	Cla001649	0.407	0.376	0.407	0.1	1	1	1	Ty3-gypsy
Non_sig	Cla001650	0.973	0.913	0.972	0.9	1	1	1	Unknown
Non_sig	Cla001651	0.66	0.208	0.083	4.3	3.3	1.2	0.6	Response
Non_sig	Cla001652	0.969	0.97	0.969	1	1	1	1	BHLH
Non_sig	Cla001653	0.901	0.727	0.955	0.6	0.5	1	0.7	BHLH
Non_sig	Cla001654	0.969	0.97	0.969	1	1	1	1	BHLH
Non_sig	Cla001655	0.969	0.97	0.969	1	1	1	1	Unknown
Non_sig	Cla001656	0.969	0.97	0.969	1	1	1	1	Unknown
Non_sig	Cla001657	0.644	0.85	0.607	5.8	4.6	4.9	8.1	Xenotropic
Non_sig	Cla001658	0.969	0.97	0.969	1	1	1	1	Unknown
Non_sig	Cla001660	0.968	0.266	0.276	2	2.2	4.7	5.1	Translocon-associated
Non_sig	Cla001661	0.969	0.97	0.969	1	1	1	1	Unknown
Non_sig	Cla001662	0.854	0.247	0.361	4.8	4.5	8.7	8.5	Protein
Non_sig	Cla001663	0.996	0.735	0.615	6.6	7	7.5	5.2	Transcription
Non_sig	Cla001665	0.842	0.764	0.739	0.3	0.5	0.1	0.1	Unknown
Non_sig	Cla001666	0.435	0.302	0.361	3.5	6.2	6.5	6.7	Unknown
Non_sig	Cla001667	0.885	0.196	0.451	9.6	9.5	15.4	13.9	Chromosome
Non_sig	Cla001668	0.576	0.111	0.034	5.4	7.8	11.5	15.7	ER
Non_sig	Cla001669	0.969	0.97	0.969	1	1	1	1	Unknown
Non_sig	Cla001670	0.969	0.97	0.969	1	1	1	1	Aquaporin
Non_sig	Cla001671	0.313	0.424	0.015	4.5	8.5	6.9	16.1	Uncharacterized
Non_sig	Cla001672	0.673	0.196	0.165	0.2	0.6	2.1	2.6	Equilibrative
Non_sig	Cla001673	0.872	0.764	0.56	0.3	0.2	0.1	1	Unknown
Non_sig	Cla001674	0.688	0.422	0.28	4.3	3.4	2.1	1.8	Cyclin
Non_sig	Cla001675	0.969	0.97	0.969	1	1	1	1	Unknown
Non_sig	Cla001676	0.969	0.97	0.969	1	1	1	1	CACTA
Non_sig	Cla001677	0.99	0.026	0.03	14.4	15.3	27.7	30.1	Translocon-associated
Non_sig	Cla001678	0.705	0.195	0.328	2.8	2.1	0.4	1	Fatty
Non_sig	Cla001679	0.956	0.071	0.1	4.8	4.9	0.5	1	Fatty
Non_sig	Cla001680	0.987	0.66	0.292	2.4	2.5	3.3	5.6	Methyltransferase
Non_sig	Cla001681	0.99	0.991	0.867	0.1	0.1	0.1	0.2	Cellulose
Non_sig	Cla001682	0.978	0.902	0.947	0.5	0.5	0.6	0.6	Pentatricopeptide
Non_sig	Cla001683	0.816	0.719	0.7	2.4	3.1	3.1	3.5	Coiled-coil
Non_sig	Cla001684	0.886	0.922	0.657	0.4	0.3	0.3	0.1	Unknown
Non_sig	Cla001685	0.524	0.565	0.238	12.7	17	15	20.4	Coiled-coil
Non_sig	Cla001686	0.98	0.73	0.579	2.8	2.9	3.5	4.5	Unknown
Non_sig	Cla001687	0.407	0.991	0.407	0.1	1	0.1	1	Unknown
Non_sig	Cla001688	0.961	0.199	0.7	7.1	7.7	2.8	9.1	Carboxypeptidase
Non_sig	Cla001689	0.407	0.991	0.99	0.1	1	0.1	0.1	Unknown
Non_sig	Cla001690	0.969	0.97	0.969	1	1	1	1	Unknown
Non_sig	Cla001691	0.976	0.642	0.159	6.7	7.2	8.1	13.6	DNA
Non_sig	Cla001692	0.926	0.601	0.743	1	1.2	1.8	1.6	Unknown
Non_sig	Cla001693	0.518	0.406	0.589	1	0.3	0.1	0.4	Unknown
Non_sig	Cla001695	0.508	0.619	0.332	22.1	28.2	17.9	30.6	Unknown
Non_sig	Cla001696	0.774	0.759	0.867	0.9	1.4	0.5	1.2	Prephenate
Non_sig	Cla001697	0.969	0.97	0.969	1	1	1	1	Unknown
Non_sig	Cla001698	0.375	0.97	0.969	1	0.1	1	1	Unknown
Non_sig	Cla001699	0.407	0.376	0.407	0.1	1	1	1	Type
Non_sig	Cla001700	0.775	0.525	0.474	1.6	1.2	0.6	0.6	Histone-binding
Non_sig	Cla001701	0.738	0.896	0.887	0.4	0.8	0.5	0.3	Unknown
Non_sig	Cla001702	0.969	0.97	0.969	1	1	1	1	MYB
Non_sig	Cla001703	0.997	0.527	0.879	5	5.3	3	5.8	Remorin
Non_sig	Cla001704	0.969	0.97	0.969	1	1	1	1	Unknown
Non_sig	Cla001705	0.969	0.97	0.969	1	1	1	1	Unknown
Non_sig	Cla001706	0.969	0.97	0.969	1	1	1	1	Unknown
Non_sig	Cla001707	0.969	0.97	0.969	1	1	1	1	Unknown
Non_sig	Cla001708	0.693	0.667	0.663	1.9	2.9	2.7	3	Lipid
Non_sig	Cla001709	0.679	0.513	0.836	2.1	3.2	3.5	1.8	Pentatricopeptide
Non_sig	Cla001710	0.853	0.729	0.655	4.1	3.8	4.9	3.1	Pentatricopeptide
Non_sig	Cla001711	0.973	0.741	0.817	7.6	7.9	8.5	9	Fertilization-independent
Non_sig	Cla001714	0.969	0.406	0.162	1	1	0.1	4.4	Thioredoxin
Non_sig	Cla001716	0.668	0.45	0.149	5	6.8	2.7	1.5	Kinesin-like
Non_sig	Cla001717	0.969	0.97	0.969	1	1	1	1	Ty3-gypsy
Non_sig	Cla001718	0.969	0.97	0.969	1	1	1	1	Unknown
Non_sig	Cla001719	0.615	0.369	0.112	4.6	3.4	2.1	11.4	Formin
Non_sig	Cla001721	0.656	0.418	0.489	1.4	0.8	0.3	0.5	Os04g0690100
Non_sig	Cla001722	0.506	0.195	0.059	8.1	6	3.4	2.3	Receptor-like
Non_sig	Cla001723	0.969	0.97	0.969	1	1	1	1	Unknown
Non_sig	Cla001725	0.969	0.97	0.969	1	1	1	1	Unknown
Non_sig	Cla001726	0.986	0.866	0.903	0.2	0.2	0.1	0.3	Unknown
Non_sig	Cla001728	0.99	0.844	0.99	0.1	0.1	0.2	0.1	Unknown
Non_sig	Cla001729	0.765	0.739	0.686	0.1	0.3	0.3	0.4	Major
Non_sig	Cla001730	0.998	0.558	0.699	3.6	3.8	5.1	2.8	Pentatricopeptide
Non_sig	Cla001731	0.375	0.97	0.375	1	0.1	1	0.1	Unknown
Non_sig	Cla001732	0.57	0.615	0.225	2.9	1.8	1.7	0.7	Xyloglucan
Non_sig	Cla001733	0.876	0.72	0.703	1	1.3	1.5	1.7	Ethylene-responsive
Non_sig	Cla001734	0.402	0.321	0.176	2	0.7	0.4	0.1	Unknown
Non_sig	Cla001735	0.923	0.887	0.923	0.3	0.4	0.4	0.4	F-box
Non_sig	Cla001737	0.372	0.431	0.07	8.6	13.4	5.3	2.8	Malonyl-coenzyme
Non_sig	Cla001738	0.969	0.97	0.969	1	1	1	1	Unknown
Non_sig	Cla001739	0.969	0.97	0.969	1	1	1	1	Unknown
Non_sig	Cla001740	0.969	0.97	0.969	1	1	1	1	Unknown
Non_sig	Cla001741	0.842	0.805	0.654	0.3	0.5	0.5	0.8	Calcium
Non_sig	Cla001742	0.99	0.991	0.407	0.1	0.1	0.1	1	Unknown
Non_sig	Cla001743	0.375	0.97	0.375	1	0.1	1	0.1	Unknown
Non_sig	Cla001744	0.969	0.406	0.969	1	1	0.1	1	Unknown
Non_sig	Cla001745	0.969	0.97	0.375	1	1	1	0.1	Receptor
Non_sig	Cla001746	0.619	0.736	0.93	2	1.2	1.3	2.3	Cation/H(+)
Non_sig	Cla001747	0.867	0.739	0.765	0.1	0.2	0.3	0.3	Unknown
Non_sig	Cla001748	0.962	0.739	0.054	0.7	0.8	1.1	5.8	Cation/H(+)
Non_sig	Cla001749	0.98	0.59	0.221	0.4	0.4	1	2.6	Cation/H(+)
Non_sig	Cla001750	0.969	0.97	0.969	1	1	1	1	Unknown
Non_sig	Cla001751	0.969	0.97	0.969	1	1	1	1	Unknown
Non_sig	Cla001753	0.994	0.297	0.146	5.7	6	2.5	1.9	Ribulose
Non_sig	Cla001755	0.991	0.418	0.991	1.4	1.5	0.3	1.5	Unknown
Non_sig	Cla001756	0.847	0.343	0.577	3	2.7	1	1.9	Unknown
Non_sig	Cla001757	0.87	0.313	0.21	1.6	1.4	0.2	5	Cation/H(+)
Non_sig	Cla001758	0.566	0.35	0.188	1.2	0.5	0.1	4.5	Cation/H+
Non_sig	Cla001759	0.518	0.406	0.375	1	0.3	0.1	0.1	Unknown
Non_sig	Cla001760	0.969	0.97	0.969	1	1	1	1	Unknown
Non_sig	Cla001761	0.99	0.376	0.407	0.1	0.1	1	1	Unknown
Non_sig	Cla001762	0.843	0.866	0.843	0.2	0.1	0.1	0.1	Unknown
Non_sig	Cla001763	0.969	0.97	0.969	1	1	1	1	Unknown
Non_sig	Cla001765	0.732	0.777	0.804	7	8.8	7.7	8.4	POT
Non_sig	Cla001766	0.633	0.036	0.212	2.2	3.5	8.9	6	Unknown
Non_sig	Cla001767	0.833	0.906	0.732	0.6	0.9	0.7	0.3	Unknown
Non_sig	Cla001768	0.969	0.406	0.375	1	1	0.1	0.1	Amino
Non_sig	Cla001769	0.816	0.194	0.134	3.7	4.6	7.8	9.5	Heat
Non_sig	Cla001770	0.893	0.047	0.168	6.6	7.5	15.3	13.3	Unknown
Non_sig	Cla001771	0.509	0.697	0.113	12.5	16.9	13.8	22.9	Serine/threonine-protein
Non_sig	Cla001772	0.761	0.616	0.675	0.8	1.3	1.5	1.5	Core-2/I-branching
Non_sig	Cla001773	0.791	0.388	0.3	8.8	10.5	5.2	5.3	Calmodulin
Non_sig	Cla001774	0.99	0.991	0.867	0.1	0.1	0.1	0.2	Unknown
Non_sig	Cla001775	0.885	0.599	0.6	4.3	5	5.7	6.3	Rieske
Non_sig	Cla001776	0.969	0.97	0.969	1	1	1	1	Unknown
Non_sig	Cla001777	0.847	0.612	0.626	17.3	19.5	19.4	21.4	Phosphatidylglycerol/phosphatidylinositol
Non_sig	Cla001779	0.969	0.97	0.969	1	1	1	1	Thaumatin-like
Non_sig	Cla001780	0.969	0.97	0.969	1	1	1	1	Calmodulin
Non_sig	Cla001781	0.969	0.97	0.969	1	1	1	1	Beta-galactosidase
Non_sig	Cla001782	0.969	0.97	0.969	1	1	1	1	Beta-galactosidase
Non_sig	Cla001783	0.117	0.823	0.48	43.5	62.6	43.3	53.1	BEL1-like
Non_sig	Cla001784	0.877	0.405	0.3	6.1	5.9	3.3	3.2	BTB/POZ
Non_sig	Cla001785	0.317	0.176	0.222	14.1	21	21.2	22.5	Histone-lysine
Non_sig	Cla001786	0.788	0.435	0.7	1.9	1.5	0.6	1.3	Ternary
Non_sig	Cla001787	0.545	0.303	0.273	1.4	0.6	0.1	0.1	TMV
Non_sig	Cla001788	0.969	0.97	0.969	1	1	1	1	Unknown
Non_sig	Cla001789	0.869	0.678	0.405	1.5	1.9	2.2	3.5	CASP-like
Non_sig	Cla001791	0.969	0.97	0.375	1	1	1	0.1	Cold
Non_sig	Cla001792	0.333	0.19	0.192	3.7	7.2	0.8	1	BTB/POZ
Non_sig	Cla001795	0.375	0.97	0.375	1	0.1	1	0.1	mRNA
Non_sig	Cla001796	0.637	0.011	0.089	3.4	5	13.3	10	Unknown
Non_sig	Cla001797	0.626	0.889	0.95	1.5	2.6	1.2	1.7	Unknown
Non_sig	Cla001799	0.568	0.02	0.336	3.3	5.2	12	6.6	Unknown
Non_sig	Cla001801	0.984	0.653	0.964	6.5	6.8	4.7	6.7	Brain
Non_sig	Cla001802	0.665	0.757	0.489	2.7	1.9	3.3	4.8	Unknown
Non_sig	Cla001803	0.975	0.915	0.752	3.2	3.3	3.3	2.6	Ribonuclease
Non_sig	Cla001804	0.976	0.771	0.535	0.6	0.6	0.3	0.1	Unknown
Non_sig	Cla001805	0.784	0.664	0.647	1.8	1.4	1	1.1	Mitochondrial
Non_sig	Cla001806	0.161	0.031	0.298	35.8	51.3	53.8	47.6	Guanine
Non_sig	Cla001807	0.969	0.77	0.83	3.4	3.7	4	4.2	B3
Non_sig	Cla001808	0.491	0.65	0.686	1.7	0.7	0.9	1.1	B3
Non_sig	Cla001809	0.589	0.97	0.375	1	0.4	1	0.1	B3
Non_sig	Cla001810	0.631	0.575	0.284	19	23.3	21.5	27.6	Molybdenum
Non_sig	Cla001811	0.762	0.636	0.604	2.5	3.4	3.5	4	Cyclin-H
Non_sig	Cla001812	0.842	0.38	0.52	0.3	0.5	1.4	1.1	Dof
Non_sig	Cla001813	0.487	0.914	0.864	3.6	2.1	3.7	4.3	Nucleoporin
Non_sig	Cla001814	0.995	0.377	0.549	7.4	7.8	4.1	5.6	Alpha-hydroxynitrile
Non_sig	Cla001815	0.086	0.33	0.543	2.9	9.2	0.9	4.8	Alpha-hydroxynitrile
Non_sig	Cla001816	0.819	0.522	0.78	0.9	1.3	0.2	0.6	Alpha-hydroxynitrile
Non_sig	Cla001817	0.043	0.756	0.215	5.3	15	4.1	10.7	Hydrolase
Non_sig	Cla001818	0.915	0.715	0.601	1.4	1.3	0.8	0.7	Dof
Non_sig	Cla001819	0.176	0.019	0.017	6.7	2.8	0.3	0.5	Laccase-22
Non_sig	Cla001820	0.969	0.97	0.969	1	1	1	1	GEM-like
Non_sig	Cla001821	0.692	0.337	0.879	2.5	1.8	0.7	2.3	Disease
Non_sig	Cla001823	0.792	0.05	0.014	6.5	7.9	15	19.9	Misato
Non_sig	Cla001825	0.842	0.733	0.016	0.3	0.5	0.6	7	Peroxidase
Non_sig	Cla001826	0.826	0.607	0.567	5.5	6.6	3.7	4	Calcium-dependent
Non_sig	Cla001827	0.872	0.831	0.414	7.9	7.7	6.7	5.3	Short-chain
Non_sig	Cla001829	0.262	0.227	0.197	19	28	25.9	29.3	Transmembrane
Non_sig	Cla001830	0.657	0.59	0.657	0.4	0.1	1	0.1	Unknown
Non_sig	Cla001831	0.969	0.97	0.969	1	1	1	1	Unknown
Non_sig	Cla001832	0.676	0.364	0.726	1.6	1	0.3	1.1	P-loop
Non_sig	Cla001833	0.969	0.97	0.969	1	1	1	1	Unknown
Non_sig	Cla001834	0.969	0.97	0.969	1	1	1	1	Unknown
Non_sig	Cla001836	0.322	0.922	0.98	0.4	2	0.3	0.4	Receptor
Non_sig	Cla001837	0.969	0.97	0.969	1	1	1	1	Unknown
Non_sig	Cla001838	0.969	0.97	0.969	1	1	1	1	Retrotransposon
Non_sig	Cla001839	0.778	0.573	0.834	2.8	3.7	4.1	3.5	Unknown
Non_sig	Cla001840	0.556	0.238	0.431	6.6	9.4	11.1	10.3	CD2
Non_sig	Cla001841	0.915	0.513	0.361	3.5	4	5.2	6.7	SKIP
Non_sig	Cla001842	0.919	0.032	0.015	11.8	13	23.6	28.4	Annexin
Non_sig	Cla001843	0.685	0.213	0.22	3	4.3	6.6	7.2	Unknown
Non_sig	Cla001844	0.88	0.855	0.671	6	6.9	5.1	4.9	PHP
Non_sig	Cla001845	0.834	0.225	0.769	5	6	9.2	6.3	Chloroplastic
Non_sig	Cla001846	0.969	0.97	0.969	1	1	1	1	Unknown
Non_sig	Cla001847	0.969	0.97	0.969	1	1	1	1	Peroxidase
Non_sig	Cla001848	0.969	0.97	0.969	1	1	1	1	Unknown
Non_sig	Cla001849	0.847	0.439	0.638	0.9	0.7	0.1	0.4	Peroxidase
Non_sig	Cla001850	0.969	0.97	0.969	1	1	1	1	Unknown
Non_sig	Cla001852	0.991	0.747	0.646	1.4	1.5	1.9	2.4	Pentatricopeptide
Non_sig	Cla001853	0.856	0.361	0.443	1.1	0.9	2.8	2.7	Unknown
Non_sig	Cla001854	0.969	0.97	0.969	1	1	1	1	Unknown
Non_sig	Cla001855	0.447	0.483	0.375	1	0.2	0.2	0.1	Unknown
Non_sig	Cla001856	0.626	0.634	0.525	1.6	0.9	0.8	0.7	Cyclin-dependent
Non_sig	Cla001858	0.969	0.97	0.969	1	1	1	1	Unknown
Non_sig	Cla001859	0.969	0.97	0.969	1	1	1	1	Unknown
Non_sig	Cla001860	0.347	0.983	0.463	15.3	11.2	14.4	20.7	Histone
Non_sig	Cla001861	0.674	0.62	0.312	13.1	11.7	10.1	19.8	Histone
Non_sig	Cla001862	0.969	0.97	0.969	1	1	1	1	Retrotransposon
Non_sig	Cla001863	0.903	0.987	0.903	0.2	0.3	0.2	0.3	Unknown
Non_sig	Cla001864	0.976	0.862	0.833	0.6	0.6	0.4	0.9	Histone
Non_sig	Cla001865	0.969	0.97	0.969	1	1	1	1	Unknown
Non_sig	Cla001866	0.375	0.406	0.375	1	0.1	0.1	0.1	Zinc
Non_sig	Cla001867	0.943	0.051	0.059	6.3	6.4	14.7	15.8	Arabidopsis
Non_sig	Cla001868	0.969	0.97	0.969	1	1	1	1	Unknown
Non_sig	Cla001869	0.376	0.104	0.168	19	14.8	29	30	Pescadillo
Non_sig	Cla001870	0.988	0.561	0.489	9.3	9.9	11.4	13.2	Vacuolar
Non_sig	Cla001871	0.038	0.624	0.248	27.8	48	30	39.1	Alpha/beta-hydrolase
Non_sig	Cla001872	0.331	0.376	0.586	4.4	8.2	7.1	6.5	Alpha/beta-hydrolases-like
Non_sig	Cla001873	0.407	0.376	0.99	0.1	1	1	0.1	Auxin-induced
Non_sig	Cla001874	0.066	0.09	0.066	6.1	1.3	1.3	1.3	Structural
Non_sig	Cla001875	0.909	0.129	0.111	6.4	7.2	12.5	14.2	50S
Non_sig	Cla001876	0.78	0.535	0.66	3	2.5	4.5	4.4	Unknown
Non_sig	Cla001877	0.974	0.517	0.487	0.7	0.7	0.1	0.1	Respiratory
Non_sig	Cla001878	0.866	0.965	0.615	1.4	1.2	1.4	2.5	Unknown
Non_sig	Cla001879	0.746	0.563	0.319	0.7	1.2	1.5	2.6	NADH
Non_sig	Cla001880	0.72	0.04	0.35	16	19.1	28.5	22.9	Pre-mRNA
Non_sig	Cla001881	0.121	0.699	0.434	2.7	8.1	3.5	5.1	Zinc
Non_sig	Cla001882	0.471	0.07	0.051	7	10.5	14.9	17.3	ATP-dependent
Non_sig	Cla001883	0.966	0.979	0.805	1.2	1.2	1.1	0.9	Kinesin-like
Non_sig	Cla001884	0.969	0.97	0.969	1	1	1	1	Contains
Non_sig	Cla001885	0.973	0.985	0.855	6.5	7	6.1	6.2	Polyphosphoinositide
Non_sig	Cla001886	0.852	0.728	0.585	4	4.8	4.8	6	Polyphosphoinositide
Non_sig	Cla001887	0.947	0.841	0.591	0.5	0.6	0.3	0.1	Ribosomal
Non_sig	Cla001888	0.728	0.957	0.765	6.2	7.9	5.7	7.7	Polyphosphoinositide
Non_sig	Cla001889	0.969	0.97	0.969	1	1	1	1	Pectinesterase
Non_sig	Cla001890	0.802	0.941	0.748	18.1	17.6	17.6	21.2	Threonyl-tRNA
Non_sig	Cla001891	0.95	0.619	0.48	7.7	8.4	9.3	11.3	Pescadillo
Non_sig	Cla001892	0.63	0.553	0.366	4.1	5.9	5.7	7.5	Serine/threonine-protein
Non_sig	Cla001893	0.835	0.622	0.673	2.8	3.5	3.9	4.1	50S
Non_sig	Cla001894	0.501	0.129	0.446	4.8	7.5	10.3	2.9	Cytochrome
Non_sig	Cla001895	0.51	0.032	0.999	19.2	24.8	33.4	20.3	Short-chain
Non_sig	Cla001898	0.946	0.059	0.238	1.4	1.6	6.5	4.4	Triacylglycerol
Non_sig	Cla001899	0.969	0.406	0.969	1	1	0.1	1	Unknown
Non_sig	Cla001900	0.251	0.1	0.158	39.9	53.6	53.3	56.4	Auxin
Non_sig	Cla001901	0.79	0.639	0.63	1	0.7	1.7	1.9	AtV27-like
Non_sig	Cla001902	0.835	0.328	0.123	3.5	4.3	6.3	9.4	Mitotic
Non_sig	Cla001903	0.535	0.921	0.066	10.6	14.4	10.5	22	Proteasome
Non_sig	Cla001904	0.933	0.566	0.823	5.4	6	7.1	6.5	Survival
Non_sig	Cla001905	0.446	0.212	0.295	9.8	14.2	15.4	15.8	Nucleic
Non_sig	Cla001906	0.716	0.577	0.768	0.8	1.4	1.6	0.5	Short-chain
Non_sig	Cla001907	0.527	0.476	0.778	0.6	1.6	1.6	1	Cytochrome
Non_sig	Cla001908	0.969	0.97	0.969	1	1	1	1	Short-chain
Non_sig	Cla001909	0.392	0.167	0.069	68.6	83.4	50.4	52	Short-chain
Non_sig	Cla001910	0.456	0.531	0.127	8.1	12	10.3	16.3	Uncharacterized
Non_sig	Cla001912	0.986	0.448	0.673	0.2	0.2	1	0.6	Unknown
Non_sig	Cla001913	0.421	0.956	0.486	14	19.6	13	11.2	Short-chain
Non_sig	Cla001914	0.658	0.176	0.121	0.7	1.4	3.3	4.3	Short-chain
Non_sig	Cla001915	0.67	0.4	0.563	4.7	3.7	7.3	7	Short-chain
Non_sig	Cla001916	0.99	0.378	0.314	6	6.3	3.1	3.2	Cytosine-specific
Non_sig	Cla001917	0.539	0.263	0.125	0.5	1.4	2.3	3.8	Lysine
Non_sig	Cla001918	0.246	0.096	0.276	24.9	35.6	36.3	18.9	3-oxoacyl-reductase
Non_sig	Cla001919	0.969	0.97	0.375	1	1	1	0.1	AT
Non_sig	Cla001920	0.969	0.97	0.375	1	1	1	0.1	Unknown
Non_sig	Cla001921	0.969	0.97	0.969	1	1	1	1	Unknown
Non_sig	Cla001922	0.969	0.97	0.969	1	1	1	1	Unknown
Non_sig	Cla001923	0.813	0.873	0.903	0.2	0.4	0.3	0.3	Unknown
Non_sig	Cla001924	0.969	0.97	0.969	1	1	1	1	Unknown
Non_sig	Cla001925	0.859	0.632	0.538	10.8	12.3	12.5	14.6	ATP-dependent
Non_sig	Cla001926	0.98	0.812	0.937	0.4	0.4	0.2	0.5	Unknown
Non_sig	Cla001927	0.586	0.528	0.569	6.1	8.6	8.1	8.7	ATP-dependent
Non_sig	Cla001928	0.969	0.97	0.969	1	1	1	1	Unknown
Non_sig	Cla001929	0.969	0.97	0.969	1	1	1	1	Unknown
Non_sig	Cla001930	0.975	0.525	0.761	17.3	18.1	20.2	20.2	Major
Non_sig	Cla001931	0.309	0.184	0.777	11.4	17.7	17.8	13.5	MLP-like
Non_sig	Cla001932	0.969	0.97	0.375	1	1	1	0.1	Unknown
Non_sig	Cla001933	0.969	0.97	0.969	1	1	1	1	Unknown
Non_sig	Cla001934	0.969	0.97	0.969	1	1	1	1	Unknown
Non_sig	Cla001935	0.969	0.97	0.969	1	1	1	1	Unknown
Non_sig	Cla001936	0.969	0.97	0.969	1	1	1	1	Unknown
Non_sig	Cla001937	0.853	0.104	0.127	6.6	7.7	1.7	2.3	RNA-dependent
Non_sig	Cla001938	0.488	0.071	0.403	5.2	8.1	12.3	8.7	Hydroxyacylglutathione
Non_sig	Cla001939	0.796	0.361	0.051	1.1	1.6	2.8	6.8	Succinate
Non_sig	Cla001941	0.806	0.674	0.834	2.8	3.6	3.7	3.5	Unknown
Non_sig	Cla001942	0.969	0.97	0.969	1	1	1	1	Unknown
Non_sig	Cla001943	0.534	0.394	0.231	1.2	2.5	2.8	4.1	SMP-30/Gluconolaconase/LRE
Non_sig	Cla001944	0.374	0.61	0.595	4.8	8.4	6.2	3.5	Nicotinate-nucleotide
Non_sig	Cla001945	0.382	0.541	0.624	5.9	9.8	7.8	4.6	Nicotinate-nucleotide
Non_sig	Cla001946	0.969	0.97	0.969	1	1	1	1	Unknown
Non_sig	Cla001948	0.969	0.97	0.969	1	1	1	1	Unknown
Non_sig	Cla001949	0.843	0.866	0.843	0.2	0.1	0.1	0.1	Unknown
Non_sig	Cla001950	0.765	0.445	0.158	0.1	0.3	0.8	2.4	Unknown
Non_sig	Cla001952	0.978	0.902	0.895	0.5	0.5	0.6	0.4	Unknown
Non_sig	Cla001953	0.969	0.97	0.969	1	1	1	1	Unknown
Non_sig	Cla001955	0.969	0.97	0.969	1	1	1	1	Unknown
Non_sig	Cla001956	0.969	0.97	0.375	1	1	1	0.1	Unknown
Non_sig	Cla001957	0.969	0.97	0.969	1	1	1	1	Unknown
Non_sig	Cla001958	0.969	0.97	0.969	1	1	1	1	Retrotransposon
Non_sig	Cla001959	0.969	0.97	0.969	1	1	1	1	Unknown
Non_sig	Cla001961	0.761	0.741	0.385	21.1	20.3	18	16.8	Trihelix
Non_sig	Cla001962	0.765	0.739	0.117	0.1	0.3	0.3	2.9	Unknown
Non_sig	Cla001963	0.969	0.97	0.969	1	1	1	1	Unknown
Non_sig	Cla001964	0.341	0.631	0.126	34.5	28.7	29	24.4	Trihelix
Non_sig	Cla001965	0.969	0.97	0.375	1	1	1	0.1	Unknown
Non_sig	Cla001966	0.969	0.97	0.969	1	1	1	1	Unknown
Non_sig	Cla001967	0.772	0.887	0.983	0.3	0.6	0.4	0.3	Unknown
Non_sig	Cla001968	0.8	0.719	0.636	1.6	2.2	2.2	2.7	RNA-binding
Non_sig	Cla001969	0.407	0.991	0.867	0.1	1	0.1	0.2	Unknown
Non_sig	Cla001970	0.484	0.448	0.843	0.2	1	1	0.1	Unknown
Non_sig	Cla001971	0.969	0.97	0.969	1	1	1	1	Unknown
Non_sig	Cla001972	0.969	0.97	0.969	1	1	1	1	Unknown
Non_sig	Cla001973	0.969	0.97	0.969	1	1	1	1	Unknown
Non_sig	Cla001974	0.407	0.991	0.407	0.1	1	0.1	1	Unknown
Non_sig	Cla001975	0.765	0.591	0.565	0.1	0.3	0.5	0.6	Harpin-induced
Non_sig	Cla001977	0.969	0.97	0.969	1	1	1	1	Unknown
Non_sig	Cla001978	0.969	0.97	0.969	1	1	1	1	Gag/pol
Non_sig	Cla001979	0.484	0.987	0.986	0.2	1	0.2	0.2	Unknown
Non_sig	Cla001980	0.617	0.124	0.123	9.2	12.1	16.3	18	Unknown
Non_sig	Cla001981	0.99	0.991	0.99	0.1	0.1	0.1	0.1	Amine
Non_sig	Cla001982	0.969	0.97	0.969	1	1	1	1	Cyclopropane
Non_sig	Cla001983	0.969	0.97	0.969	1	1	1	1	Unknown
Non_sig	Cla001984	0.969	0.97	0.969	1	1	1	1	Unknown
Non_sig	Cla001985	0.985	0.621	0.891	1.2	1.3	2	1.5	tRNA
Non_sig	Cla001986	0.969	0.639	0.829	1	1	1.7	1.4	tRNA
Non_sig	Cla001987	0.969	0.445	0.925	1	1	2.3	1.2	tRNA
Non_sig	Cla001988	0.969	0.97	0.969	1	1	1	1	Polygalacturonase
Non_sig	Cla001989	0.969	0.97	0.375	1	1	1	0.1	Unknown
Non_sig	Cla001990	0.523	0.195	0.215	1.8	3.4	5	5.3	General
Non_sig	Cla001991	0.867	0.844	0.99	0.1	0.2	0.2	0.1	Unknown
Non_sig	Cla001992	0.969	0.97	0.969	1	1	1	1	Unknown
Non_sig	Cla001993	0.969	0.97	0.969	1	1	1	1	Unknown
Non_sig	Cla001994	0.969	0.97	0.852	1	1	1	0.8	Phloem
Non_sig	Cla001995	0.969	0.97	0.969	1	1	1	1	Unknown
Non_sig	Cla001996	0.969	0.97	0.969	1	1	1	1	Unknown
Non_sig	Cla001997	0.886	0.812	0.78	0.4	0.3	0.2	0.2	Unknown
Non_sig	Cla001998	0.969	0.97	0.969	1	1	1	1	Unknown
Non_sig	Cla001999	0.99	0.658	0.565	0.1	0.1	0.4	0.6	Phloem
Non_sig	Cla002000	0.772	0.614	0.709	0.3	0.6	0.8	0.7	Unknown
Non_sig	Cla002001	0.969	0.97	0.969	1	1	1	1	Phloem
Non_sig	Cla002002	0.969	0.97	0.969	1	1	1	1	Unknown
Non_sig	Cla002003	0.443	0.602	0.548	6.4	4.2	4.4	9.2	Galactose-binding
Non_sig	Cla002004	0.931	0.961	0.603	4.8	4.8	4.7	6.9	Phloem
Non_sig	Cla002005	0.969	0.97	0.375	1	1	1	0.1	Unknown
Non_sig	Cla002006	0.484	0.873	0.986	0.2	1	0.3	0.2	Unknown
Non_sig	Cla002007	0.375	0.97	0.969	1	0.1	1	1	Unknown
Non_sig	Cla002008	0.969	0.97	0.969	1	1	1	1	Unknown
Non_sig	Cla002009	0.969	0.97	0.969	1	1	1	1	Unknown
Non_sig	Cla002011	0.969	0.97	0.969	1	1	1	1	Phloem
Non_sig	Cla002012	0.908	0.799	0.084	0.8	0.7	1.1	5.2	Unknown
Non_sig	Cla002013	0.375	0.406	0.375	1	0.1	0.1	0.1	Unknown
Non_sig	Cla002014	0.99	0.376	0.867	0.1	0.1	1	0.2	Unknown
Non_sig	Cla002015	0.539	0.14	0.031	5.3	7.9	10.8	15.8	Cysteine
Non_sig	Cla002016	0.969	0.97	0.969	1	1	1	1	Unknown
Non_sig	Cla002017	0.375	0.97	0.375	1	0.1	1	0.1	Unknown
Non_sig	Cla002018	0.969	0.97	0.969	1	1	1	1	Unknown
Non_sig	Cla002019	0.903	0.81	0.916	2.2	2.6	2.6	2.1	Pentatricopeptide
Non_sig	Cla002020	0.867	0.844	0.867	0.1	0.2	0.2	0.2	Unknown
Non_sig	Cla002021	0.969	0.97	0.969	1	1	1	1	Unknown
Non_sig	Cla002022	0.986	0.866	0.986	0.2	0.2	0.1	0.2	Unknown
Non_sig	Cla002023	0.89	0.878	0.762	7.5	8.5	7.7	9.2	ATP-dependent
Non_sig	Cla002024	0.867	0.658	0.765	0.1	0.2	0.4	0.3	Unknown
Non_sig	Cla002025	0.951	0.768	0.312	59.3	63.4	53.2	74.7	Late-embryogenesis
Non_sig	Cla002026	0.969	0.406	0.969	1	1	0.1	1	Unknown
Non_sig	Cla002027	0.969	0.97	0.969	1	1	1	1	Unknown
Non_sig	Cla002028	0.969	0.97	0.969	1	1	1	1	Unknown
Non_sig	Cla002029	0.969	0.97	0.969	1	1	1	1	Unknown
Non_sig	Cla002030	0.375	0.97	0.375	1	0.1	1	0.1	Calcium
Non_sig	Cla002031	0.969	0.97	0.969	1	1	1	1	Unknown
Non_sig	Cla002032	0.843	0.987	0.986	0.2	0.1	0.2	0.2	Unknown
Non_sig	Cla002033	0.652	0.773	0.212	26.4	24.6	27.1	38.2	Importin
Non_sig	Cla002034	0.675	0.973	0.76	0.8	1.5	0.8	1.3	Transcription
Non_sig	Cla002035	0.866	0.439	0.648	4.5	5.3	6.8	6.3	Signal
Non_sig	Cla002036	0.969	0.97	0.969	1	1	1	1	Unknown
Non_sig	Cla002037	0.969	0.97	0.969	1	1	1	1	Unknown
Non_sig	Cla002038	0.969	0.97	0.969	1	1	1	1	Unknown
Non_sig	Cla002039	0.867	0.991	0.867	0.1	0.2	0.1	0.2	Ethylene
Non_sig	Cla002040	0.947	0.841	0.895	0.5	0.6	0.3	0.4	Late
Non_sig	Cla002041	0.969	0.97	0.969	1	1	1	1	Unknown
Non_sig	Cla002042	0.852	0.626	0.59	3.9	3.6	2.5	2.7	Xyloglucan
Non_sig	Cla002043	0.969	0.97	0.969	1	1	1	1	Unknown
Non_sig	Cla002044	0.871	0.994	0.617	1.7	1.5	1.6	2.9	Mitotic-spindle
Non_sig	Cla002045	0.967	0.916	0.679	1.1	1.1	1.2	1.9	Inner
Non_sig	Cla002046	0.559	0.661	0.833	6.7	9.5	4.9	6.3	Unknown
Non_sig	Cla002047	0.78	0.685	0.887	0.4	0.2	0.1	0.3	Unknown
Non_sig	Cla002048	0.972	0.799	0.675	0.8	0.8	1.1	1.5	Inner
Non_sig	Cla002049	0.784	0.708	0.615	1.4	2	2	2.5	Unknown
Non_sig	Cla002050	0.978	0.841	0.591	0.5	0.5	0.3	0.1	Unknown
Non_sig	Cla002051	0.969	0.97	0.969	1	1	1	1	Unknown
Non_sig	Cla002052	0.375	0.97	0.969	1	0.1	1	1	Unknown
Non_sig	Cla002053	0.945	0.311	0.147	4.8	5.3	8.1	11	DNA-directed
Non_sig	Cla002054	0.957	0.164	0.125	8.2	8.9	14.2	16.5	Protein
Non_sig	Cla002055	0.867	0.844	0.99	0.1	0.2	0.2	0.1	Unknown
Non_sig	Cla002056	0.375	0.97	0.969	1	0.1	1	1	Unknown
Non_sig	Cla002057	0.983	0.887	0.983	0.3	0.3	0.4	0.3	Unknown
Non_sig	Cla002058	0.969	0.97	0.969	1	1	1	1	Unknown
Non_sig	Cla002059	0.969	0.97	0.375	1	1	1	0.1	Unknown
Non_sig	Cla002060	0.846	0.702	0.777	2.8	2.5	3.6	3.7	Uncharacterized
Non_sig	Cla002061	0.737	0.873	0.986	0.2	0.5	0.3	0.2	Unknown
Non_sig	Cla002062	0.969	0.97	0.969	1	1	1	1	Unknown
Non_sig	Cla002063	0.969	0.97	0.969	1	1	1	1	Unknown
Non_sig	Cla002064	0.969	0.97	0.969	1	1	1	1	Unknown
Non_sig	Cla002065	0.969	0.97	0.969	1	1	1	1	Wall-associated
Non_sig	Cla002066	0.969	0.97	0.969	1	1	1	1	Unknown
Non_sig	Cla002067	0.867	0.991	0.407	0.1	0.2	0.1	1	Receptor-like
Non_sig	Cla002068	0.99	0.991	0.99	0.1	0.1	0.1	0.1	Unknown
Non_sig	Cla002069	0.491	0.268	0.427	7.2	10.6	11.5	11.1	Transmembrane
Non_sig	Cla002070	0.969	0.97	0.969	1	1	1	1	Unknown
Non_sig	Cla002071	0.969	0.97	0.969	1	1	1	1	MLO-like
Non_sig	Cla002072	0.969	0.97	0.969	1	1	1	1	Unknown
Non_sig	Cla002073	0.969	0.97	0.969	1	1	1	1	Unknown
Non_sig	Cla002074	0.969	0.97	0.969	1	1	1	1	Unknown
Non_sig	Cla002076	0.969	0.97	0.969	1	1	1	1	Unknown
Non_sig	Cla002077	0.986	0.987	0.986	0.2	0.2	0.2	0.2	Unknown
Non_sig	Cla002078	0.99	0.376	0.99	0.1	0.1	1	0.1	Unknown
Non_sig	Cla002079	0.969	0.97	0.969	1	1	1	1	Unknown
Non_sig	Cla002080	0.669	0.517	0.905	0.7	0.3	0.1	0.6	Zinc
Non_sig	Cla002081	0.969	0.97	0.969	1	1	1	1	Unknown
Non_sig	Cla002082	0.826	0.483	0.541	2	2.6	3.5	3.6	LOC495158
Non_sig	Cla002083	0.969	0.97	0.969	1	1	1	1	Unknown
Non_sig	Cla002084	0.895	0.832	0.031	0.5	0.4	0.7	6.3	WRKY
Non_sig	Cla002085	0.99	0.991	0.99	0.1	0.1	0.1	0.1	Unknown
Non_sig	Cla002086	0.614	0.157	0.053	10.8	14	4.8	3.8	Short-chain
Non_sig	Cla002087	0.99	0.376	0.765	0.1	0.1	1	0.3	Unknown
Non_sig	Cla002088	0.867	0.376	0.99	0.1	0.2	1	0.1	Unknown
Non_sig	Cla002089	0.969	0.97	0.969	1	1	1	1	Unknown
Non_sig	Cla002090	0.867	0.991	0.99	0.1	0.2	0.1	0.1	Unknown
Non_sig	Cla002091	0.638	0.544	0.335	4.5	3.4	6.2	8.3	Short-chain
Non_sig	Cla002092	0.867	0.991	0.284	0.1	0.2	0.1	1.5	Unknown
Non_sig	Cla002093	0.969	0.97	0.969	1	1	1	1	Retrotransposon
Non_sig	Cla002094	0.969	0.97	0.969	1	1	1	1	Unknown
Non_sig	Cla002095	0.969	0.97	0.969	1	1	1	1	Unknown
Non_sig	Cla002096	0.407	0.991	0.407	0.1	1	0.1	1	Unknown
Non_sig	Cla002097	0.973	0.712	0.486	0.9	1	1.4	0.2	Unknown
Non_sig	Cla002098	0.265	0.076	0.053	22.2	31.9	34	39	Yellow
Non_sig	Cla002099	0.854	0.218	0.976	6.8	6.5	11.6	7.3	Transcription
Non_sig	Cla002100	0.969	0.97	0.969	1	1	1	1	Unknown
Non_sig	Cla002101	0.969	0.97	0.969	1	1	1	1	Unknown
Non_sig	Cla002102	0.969	0.97	0.969	1	1	1	1	Unknown
Non_sig	Cla002103	0.639	0.016	0.013	7.8	10.3	19.7	22.3	Tubby-like
Non_sig	Cla002104	0.983	0.984	0.872	0.3	0.3	0.3	0.2	Unknown
Non_sig	Cla002105	0.969	0.97	0.969	1	1	1	1	Unknown
Non_sig	Cla002106	0.749	0.248	0.613	12.6	11.7	18.2	10.8	Ribosome
Non_sig	Cla002107	0.969	0.97	0.969	1	1	1	1	Unknown
Non_sig	Cla002108	0.375	0.97	0.375	1	0.1	1	0.1	Unknown
Non_sig	Cla002109	0.407	0.376	0.99	0.1	1	1	0.1	Unknown
Non_sig	Cla002110	0.969	0.97	0.969	1	1	1	1	Unknown
Non_sig	Cla002111	0.969	0.97	0.969	1	1	1	1	Unknown
Non_sig	Cla002112	0.969	0.97	0.969	1	1	1	1	Unknown
Non_sig	Cla002113	0.969	0.97	0.969	1	1	1	1	Unknown
Non_sig	Cla002114	0.969	0.406	0.969	1	1	0.1	1	Zinc
Non_sig	Cla002115	0.364	0.204	0.162	1	2.9	3.6	4.4	Niemann-pick
Non_sig	Cla002116	0.411	0.137	0.161	5.7	9.3	11.4	12.1	Niemann-Pick
Non_sig	Cla002117	0.716	0.383	0.52	1.1	1.8	2.7	2.4	Cholesterol
Non_sig	Cla002118	0.843	0.78	0.903	0.2	0.1	0.4	0.3	Pentatricopeptide
Non_sig	Cla002119	0.407	0.991	0.99	0.1	1	0.1	0.1	Unknown
Non_sig	Cla002120	0.308	0.688	0.839	4.4	8.4	5.4	5.3	U-box
Non_sig	Cla002121	0.969	0.97	0.969	1	1	1	1	Unknown
Non_sig	Cla002122	0.969	0.97	0.969	1	1	1	1	Unknown
Non_sig	Cla002123	0.969	0.97	0.969	1	1	1	1	Unknown
Non_sig	Cla002124	0.872	0.764	0.983	0.3	0.2	0.1	0.3	Unknown
Non_sig	Cla002125	0.813	0.78	0.673	0.2	0.4	0.4	0.6	Unknown
Non_sig	Cla002126	0.969	0.97	0.969	1	1	1	1	Unknown
Non_sig	Cla002127	0.895	0.936	0.978	0.5	0.4	0.4	0.5	Unknown
Non_sig	Cla002128	0.772	0.902	0.739	0.3	0.6	0.2	0.1	Unknown
Non_sig	Cla002129	0.969	0.97	0.969	1	1	1	1	Unknown
Non_sig	Cla002130	0.842	0.416	0.353	7	8.2	9.9	11.5	Chitobiosyldiphosphodolichol
Non_sig	Cla002131	0.824	0.527	0.798	3.9	4.8	5.6	4.9	Pentatricopeptide
Non_sig	Cla002132	0.969	0.97	0.969	1	1	1	1	Unknown
Non_sig	Cla002133	0.969	0.97	0.969	1	1	1	1	Unknown
Non_sig	Cla002134	0.969	0.97	0.969	1	1	1	1	Unknown
Non_sig	Cla002135	0.969	0.97	0.969	1	1	1	1	Unknown
Non_sig	Cla002136	0.375	0.97	0.447	1	0.1	1	0.2	Unknown
Non_sig	Cla002137	0.766	0.352	0.16	9.9	11.9	13.8	18.1	Unknown
Non_sig	Cla002138	0.907	0.185	0.305	3.2	3.7	7.2	6.7	Salt
Non_sig	Cla002139	0.481	0.249	0.327	9.4	13.4	14.4	14.9	Phd
Non_sig	Cla002140	0.594	0.721	0.534	18.5	23.1	19.7	23.7	Phd
Non_sig	Cla002142	0.911	0.973	0.857	0.8	1	0.8	1.1	Unknown
Non_sig	Cla002143	0.969	0.97	0.969	1	1	1	1	Unknown
Non_sig	Cla002144	0.124	0.144	0.915	1.4	5.7	4.9	1.3	mRNA
Non_sig	Cla002145	0.969	0.97	0.969	1	1	1	1	Unknown
Non_sig	Cla002146	0.969	0.97	0.969	1	1	1	1	Non-specific
Non_sig	Cla002147	0.786	0.596	0.441	4.2	5.3	5.6	7.1	Pentatricopeptide
Non_sig	Cla002149	0.435	0.171	0.215	5.3	8.6	10.3	10.7	tRNA
Non_sig	Cla002150	0.776	0.292	0.344	11.3	13.4	6.4	7.7	Sulfate
Non_sig	Cla002152	0.908	0.419	0.447	0.8	0.7	2.1	2.2	Os03g0385301
Non_sig	Cla002153	0.969	0.97	0.969	1	1	1	1	Unknown
Non_sig	Cla002154	0.026	0.836	0.886	37.1	21.7	33.5	40.5	60S
Non_sig	Cla002156	0.969	0.97	0.375	1	1	1	0.1	Unknown
Non_sig	Cla002157	0.399	0.18	0.029	5.4	9	10.3	16.1	Membrane-anchored
Non_sig	Cla002158	0.843	0.866	0.843	0.2	0.1	0.1	0.1	Unknown
Non_sig	Cla002159	0.563	0.753	0.395	1.7	3.1	1.1	0.5	Unknown
Non_sig	Cla002160	0.765	0.991	0.99	0.1	0.3	0.1	0.1	Unknown
Non_sig	Cla002161	0.969	0.97	0.375	1	1	1	0.1	Glutaredoxin
Non_sig	Cla002162	0.969	0.97	0.969	1	1	1	1	Unknown
Non_sig	Cla002163	0.447	0.97	0.969	1	0.2	1	1	Cation/H(+)
Non_sig	Cla002164	0.969	0.97	0.969	1	1	1	1	Unknown
Non_sig	Cla002165	0.864	0.731	0.457	15.5	17.4	16.6	21	Palmitoyltransferase
Non_sig	Cla002166	0.974	0.737	0.111	3.6	3.9	2.6	9.8	Glycerophosphodiester
Non_sig	Cla002167	0.969	0.97	0.969	1	1	1	1	Unknown
Non_sig	Cla002168	0.969	0.97	0.969	1	1	1	1	Unknown
Non_sig	Cla002169	0.969	0.97	0.969	1	1	1	1	Unknown
Non_sig	Cla002170	0.761	0.973	0.316	0.8	1.3	0.8	2.8	NAC
Non_sig	Cla002171	0.985	0.868	0.966	1.2	1.3	1.4	1.2	Pentatricopeptide
Non_sig	Cla002172	0.803	0.872	0.072	52.4	58.1	51.3	76.4	V-type
Non_sig	Cla002173	0.969	0.97	0.969	1	1	1	1	Unknown
Non_sig	Cla002174	0.864	0.818	0.339	10.4	10.2	10.9	6.9	Glucan
[truncated: 21,441 more rows]

## Sheet: PVALUE +FOLD 
				pvalue			Expression(RPM)			Sig test( pvalue<0.05, fold change >=1.5, and at leat 10 RPM in a treatment)
Sig*	ID	function	D2 vs. D1	D2 vs. D1	D2 vs. D1					D2 vs. D1	D3 vs. D1	D4 vs. D1		*
Non	Cla000001	Unknown	0.969	0.97	0.969	1	1	1	1	Non	Non	Non		Sig2: D2 vs. D1, significant change
Non	Cla000002	Retrotransposon	0.969	0.97	0.447	1	1	1	0.2	Non	Non	Non		Sig3: D3 vs. D1, significant change
Non	Cla000003	Mitochondrial	0.727	0.821	0.765	1.2	1.9	1.5	1.8	Non	Non	Non		Sig4: D4 vs. D1, significant change
Non	Cla000004	Predicted	0.969	0.97	0.969	1	1	1	1	Non	Non	Non		Sig2.3: D2 and D3 vs. D1, significant change
Non	Cla000005	ABA-inducible	0.969	0.97	0.969	1	1	1	1	Non	Non	Non		Sig2.4: D2 and D4 vs. D1, significant change
Non	Cla000006	Polygalacturonase	0.969	0.97	0.969	1	1	1	1	Non	Non	Non		Sig3.4: D3 and D4 vs. D1, significant change
Non	Cla000007	Heat	0.99	0.031	0.377	0.1	0.1	4.7	1.1	Non	Non	Non		Sig2.3.4: D2, D3 and D4 vs. D1, significant change
Non	Cla000008	Sulfate	0.969	0.97	0.969	1	1	1	1	Non	Non	Non
Non	Cla000009	Unknown	0.969	0.97	0.969	1	1	1	1	Non	Non	Non
Non	Cla000010	Unknown	0.969	0.97	0.969	1	1	1	1	Non	Non	Non
Non	Cla000011	Cytochrome	0.969	0.97	0.969	1	1	1	1	Non	Non	Non
Non	Cla000012	Nitrate	0.969	0.97	0.969	1	1	1	1	Non	Non	Non
Non	Cla000013	Unknown	0.847	0.68	0.914	1.2	1.6	0.6	1.1	Non	Non	Non
Non	Cla000014	Membrane	0.969	0.97	0.969	1	1	1	1	Non	Non	Non
Non	Cla000015	Unknown	0.375	0.97	0.969	1	0.1	1	1	Non	Non	Non
Non	Cla000016	Unknown	0.407	0.991	0.407	0.1	1	0.1	1	Non	Non	Non
Non	Cla000017	Heparanase	0.969	0.97	0.969	1	1	1	1	Non	Non	Non
Non	Cla000018	Unknown	0.969	0.97	0.969	1	1	1	1	Non	Non	Non
Non	Cla000019	Unknown	0.969	0.97	0.969	1	1	1	1	Non	Non	Non
Non	Cla000020	Unknown	0.969	0.97	0.969	1	1	1	1	Non	Non	Non
Non	Cla000021	Pseudouridine	0.969	0.406	0.969	1	1	0.1	1	Non	Non	Non
Non	Cla000022	Unknown	0.986	0.873	0.986	0.2	0.2	0.3	0.2	Non	Non	Non
Non	Cla000023	Conserved	0.969	0.97	0.969	1	1	1	1	Non	Non	Non
Non	Cla000024	TIR-NBS	0.969	0.97	0.969	1	1	1	1	Non	Non	Non
Non	Cla000025	Unknown	0.969	0.97	0.969	1	1	1	1	Non	Non	Non
Non	Cla000026	Unknown	0.969	0.97	0.969	1	1	1	1	Non	Non	Non
Non	Cla000027	ABC-type	0.907	0.628	0.81	2.3	2.7	3.3	3	Non	Non	Non
Non	Cla000028	Unknown	0.969	0.97	0.969	1	1	1	1	Non	Non	Non
Non	Cla000029	PHD-finger	0.969	0.97	0.969	1	1	1	1	Non	Non	Non
Non	Cla000030	Unknown	0.375	0.97	0.375	1	0.1	1	0.1	Non	Non	Non
Non	Cla000031	Unknown	0.969	0.97	0.969	1	1	1	1	Non	Non	Non
Non	Cla000032	Beta-D-glucosidase	0.969	0.97	0.969	1	1	1	1	Non	Non	Non
Non	Cla000033	Pentatricopeptide	0.969	0.97	0.969	1	1	1	1	Non	Non	Non
Non	Cla000035	Unknown	0.819	0.516	0.971	9.4	11	6.4	10.1	Non	Non	Non
Non	Cla000037	11S	0.969	0.97	0.969	1	1	1	1	Non	Non	Non
Non	Cla000038	ATP-dependent	0.969	0.97	0.969	1	1	1	1	Non	Non	Non
Non	Cla000039	S-adenosylmethionine	0.969	0.97	0.969	1	1	1	1	Non	Non	Non
Non	Cla000040	class	0.969	0.97	0.969	1	1	1	1	Non	Non	Non
Non	Cla000041	Unknown	0.969	0.97	0.969	1	1	1	1	Non	Non	Non
Non	Cla000042	Copine-like	0.78	0.812	0.738	0.4	0.2	0.2	0.8	Non	Non	Non
Non	Cla000043	Nucleoporin	0.969	0.97	0.969	1	1	1	1	Non	Non	Non
Non	Cla000044	Unknown	0.969	0.97	0.969	1	1	1	1	Non	Non	Non
Non	Cla000045	Prolyl	0.969	0.97	0.969	1	1	1	1	Non	Non	Non
Non	Cla000046	Unknown	0.972	0.653	0.613	0.8	0.8	0.3	0.3	Non	Non	Non
Non	Cla000047	Unknown	0.969	0.97	0.969	1	1	1	1	Non	Non	Non
Non	Cla000048	Unknown	0.969	0.97	0.969	1	1	1	1	Non	Non	Non
Non	Cla000049	Serine-threonine	0.891	0.916	0.914	1.2	1.5	1.3	1.1	Non	Non	Non
Non	Cla000050	Unknown	0.99	0.376	0.99	0.1	0.1	1	0.1	Non	Non	Non
Non	Cla000051	Unknown	0.691	0.695	0.285	1.2	2	1.8	3.7	Non	Non	Non
Non	Cla000052	Pentatricopeptide	0.438	0.825	0.586	14.9	20.5	13	12.8	Non	Non	Non
Non	Cla000053	Unknown	0.813	0.987	0.986	0.2	0.4	0.2	0.2	Non	Non	Non
Non	Cla000054	Unknown	0.969	0.97	0.969	1	1	1	1	Non	Non	Non
Non	Cla000055	Unknown	0.969	0.406	0.375	1	1	0.1	0.1	Non	Non	Non
Non	Cla000056	Acyl-CoA	0.969	0.97	0.969	1	1	1	1	Non	Non	Non
Non	Cla000057	F-box/LRR-repeat	0.447	0.634	0.518	1	0.2	0.4	0.3	Non	Non	Non
Non	Cla000058	Unknown	0.902	0.739	0.902	0.7	0.9	1.1	0.9	Non	Non	Non
Non	Cla000059	Unknown	0.375	0.406	0.447	1	0.1	0.1	0.2	Non	Non	Non
Non	Cla000060	Polygalacturonase	0.969	0.97	0.589	1	1	1	0.4	Non	Non	Non
Non	Cla000061	Unknown	0.969	0.97	0.969	1	1	1	1	Non	Non	Non
Non	Cla000062	Unknown	0.969	0.97	0.969	1	1	1	1	Non	Non	Non
Non	Cla000063	Unknown	0.969	0.97	0.969	1	1	1	1	Non	Non	Non
Non	Cla000064	Unknown	0.99	0.991	0.99	0.1	0.1	0.1	0.1	Non	Non	Non
Non	Cla000065	Unknown	0.969	0.406	0.969	1	1	0.1	1	Non	Non	Non
Non	Cla000066	Unknown	0.969	0.97	0.969	1	1	1	1	Non	Non	Non
Non	Cla000067	Unknown	0.969	0.97	0.969	1	1	1	1	Non	Non	Non
Non	Cla000068	Unknown	0.969	0.97	0.969	1	1	1	1	Non	Non	Non
Non	Cla000069	Unknown	0.969	0.97	0.969	1	1	1	1	Non	Non	Non
Non	Cla000070	Unknown	0.947	0.936	0.895	0.5	0.6	0.4	0.4	Non	Non	Non
Non	Cla000071	Unknown	0.969	0.97	0.969	1	1	1	1	Non	Non	Non
Non	Cla000072	Unknown	0.99	0.991	0.867	0.1	0.1	0.1	0.2	Non	Non	Non
Non	Cla000073	Unknown	0.969	0.97	0.969	1	1	1	1	Non	Non	Non
Non	Cla000074	Unknown	0.969	0.97	0.375	1	1	1	0.1	Non	Non	Non
Sig2	Cla000075	Receptor	0.022	0.089	0.488	9.8	24.1	3.3	7.4	Sig	Non	Non
Non	Cla000076	Unknown	0.903	0.866	0.986	0.2	0.3	0.1	0.2	Non	Non	Non
Non	Cla000077	Unknown	0.407	0.991	0.99	0.1	1	0.1	0.1	Non	Non	Non
Non	Cla000078	Unknown	0.969	0.97	0.969	1	1	1	1	Non	Non	Non
Non	Cla000079	Truncated	0.969	0.97	0.969	1	1	1	1	Non	Non	Non
Non	Cla000080	Unknown	0.969	0.97	0.969	1	1	1	1	Non	Non	Non
Non	Cla000081	Unknown	0.969	0.97	0.969	1	1	1	1	Non	Non	Non
Non	Cla000082	Unknown	0.969	0.97	0.969	1	1	1	1	Non	Non	Non
Non	Cla000083	Unknown	0.969	0.97	0.969	1	1	1	1	Non	Non	Non
Non	Cla000084	Unknown	0.407	0.376	0.407	0.1	1	1	1	Non	Non	Non
Non	Cla000085	Unknown	0.969	0.97	0.969	1	1	1	1	Non	Non	Non
Non	Cla000086	Unknown	0.969	0.97	0.969	1	1	1	1	Non	Non	Non
Non	Cla000087	Unknown	0.969	0.97	0.969	1	1	1	1	Non	Non	Non
Non	Cla000088	Unknown	0.407	0.991	0.99	0.1	1	0.1	0.1	Non	Non	Non
Non	Cla000089	Unknown	0.969	0.97	0.969	1	1	1	1	Non	Non	Non
Non	Cla000090	Unknown	0.969	0.97	0.969	1	1	1	1	Non	Non	Non
Non	Cla000091	Dof	0.969	0.97	0.969	1	1	1	1	Non	Non	Non
Non	Cla000092	Unknown	0.969	0.97	0.969	1	1	1	1	Non	Non	Non
Non	Cla000093	Unknown	0.969	0.97	0.969	1	1	1	1	Non	Non	Non
Non	Cla000094	Unknown	0.969	0.97	0.969	1	1	1	1	Non	Non	Non
Non	Cla000095	Unknown	0.375	0.97	0.969	1	0.1	1	1	Non	Non	Non
Non	Cla000096	Ankyrin	0.447	0.97	0.969	1	0.2	1	1	Non	Non	Non
Non	Cla000097	Ankyrin	0.867	0.376	0.407	0.1	0.2	1	1	Non	Non	Non
Non	Cla000098	Unknown	0.969	0.97	0.969	1	1	1	1	Non	Non	Non
Non	Cla000099	Unknown	0.969	0.97	0.969	1	1	1	1	Non	Non	Non
Non	Cla000100	Unknown	0.969	0.97	0.969	1	1	1	1	Non	Non	Non
Non	Cla000101	Unknown	0.969	0.97	0.969	1	1	1	1	Non	Non	Non
Non	Cla000102	Cytochrome	0.407	0.376	0.867	0.1	1	1	0.2	Non	Non	Non
Non	Cla000103	Unknown	0.407	0.376	0.99	0.1	1	1	0.1	Non	Non	Non
Non	Cla000104	Unknown	0.969	0.97	0.969	1	1	1	1	Non	Non	Non
Non	Cla000105	Unknown	0.969	0.97	0.969	1	1	1	1	Non	Non	Non
Non	Cla000106	Unknown	0.969	0.97	0.969	1	1	1	1	Non	Non	Non
Non	Cla000107	Unknown	0.375	0.97	0.375	1	0.1	1	0.1	Non	Non	Non
Non	Cla000108	Unknown	0.99	0.376	0.407	0.1	0.1	1	1	Non	Non	Non
Non	Cla000109	Unknown	0.969	0.97	0.969	1	1	1	1	Non	Non	Non
Non	Cla000110	Unknown	0.504	0.832	0.322	0.5	1.5	0.7	2.2	Non	Non	Non
Non	Cla000111	Homeobox-leucine	0.765	0.658	0.99	0.1	0.3	0.4	0.1	Non	Non	Non
Non	Cla000112	Unknown	0.969	0.97	0.969	1	1	1	1	Non	Non	Non
Non	Cla000113	Unknown	0.969	0.97	0.969	1	1	1	1	Non	Non	Non
Non	Cla000114	Unknown	0.969	0.97	0.375	1	1	1	0.1	Non	Non	Non
Non	Cla000115	Unknown	0.375	0.97	0.969	1	0.1	1	1	Non	Non	Non
Non	Cla000116	Unknown	0.375	0.406	0.375	1	0.1	0.1	0.1	Non	Non	Non
Non	Cla000117	Unknown	0.969	0.97	0.969	1	1	1	1	Non	Non	Non
Non	Cla000118	Unknown	0.969	0.97	0.969	1	1	1	1	Non	Non	Non
Non	Cla000119	Unknown	0.969	0.97	0.969	1	1	1	1	Non	Non	Non
Non	Cla000120	Unknown	0.375	0.406	0.447	1	0.1	0.1	0.2	Non	Non	Non
Non	Cla000121	BHLH	0.768	0.823	0.698	2.6	3.5	2	1.9	Non	Non	Non
Non	Cla000122	Unknown	0.969	0.97	0.969	1	1	1	1	Non	Non	Non
Non	Cla000123	Unknown	0.447	0.406	0.969	1	0.2	0.1	1	Non	Non	Non
Non	Cla000124	Unknown	0.969	0.97	0.969	1	1	1	1	Non	Non	Non
Non	Cla000125	Unknown	0.969	0.97	0.969	1	1	1	1	Non	Non	Non
Non	Cla000126	Unknown	0.969	0.97	0.969	1	1	1	1	Non	Non	Non
Non	Cla000127	Unknown	0.969	0.97	0.969	1	1	1	1	Non	Non	Non
Non	Cla000128	SET	0.675	0.799	0.474	0.8	1.5	1.1	2.1	Non	Non	Non
Non	Cla000129	Thioredoxin	0.973	0.346	0.835	28.4	30.3	34.2	28.4	Non	Non	Non
Non	Cla000130	Unknown	0.407	0.376	0.99	0.1	1	1	0.1	Non	Non	Non
Non	Cla000131	Hydrolase	0.969	0.97	0.969	1	1	1	1	Non	Non	Non
Non	Cla000132	Unknown	0.969	0.97	0.969	1	1	1	1	Non	Non	Non
Non	Cla000133	Unknown	0.969	0.97	0.969	1	1	1	1	Non	Non	Non
Non	Cla000134	COSII_At1g13380	0.726	0.043	0.011	6.9	6	1	0.3	Non	Non	Non
Non	Cla000135	Unknown	0.969	0.97	0.969	1	1	1	1	Non	Non	Non
Non	Cla000136	Unknown	0.969	0.97	0.969	1	1	1	1	Non	Non	Non
Non	Cla000137	Unknown	0.969	0.97	0.969	1	1	1	1	Non	Non	Non
Non	Cla000138	Unknown	0.969	0.97	0.969	1	1	1	1	Non	Non	Non
Non	Cla000139	Unknown	0.969	0.97	0.969	1	1	1	1	Non	Non	Non
Non	Cla000140	Unknown	0.447	0.406	0.447	1	0.2	0.1	0.2	Non	Non	Non
Non	Cla000141	Zinc	0.969	0.97	0.969	1	1	1	1	Non	Non	Non
Non	Cla000143	Unknown	0.986	0.987	0.986	0.2	0.2	0.2	0.2	Non	Non	Non
Sig3.4	Cla000144	Xyloglucan	0.635	5.88e-08	3.98e-11	42.7	40.7	4.3	0.5	Non	Sig	Sig
Non	Cla000145	Unknown	0.969	0.97	0.969	1	1	1	1	Non	Non	Non
Non	Cla000146	Unknown	0.969	0.97	0.969	1	1	1	1	Non	Non	Non
Non	Cla000147	Unknown	0.969	0.406	0.969	1	1	0.1	1	Non	Non	Non
Non	Cla000148	Unknown	0.969	0.97	0.969	1	1	1	1	Non	Non	Non
Non	Cla000149	Unknown	0.969	0.97	0.969	1	1	1	1	Non	Non	Non
Non	Cla000150	Beta-galactosidase	0.969	0.97	0.969	1	1	1	1	Non	Non	Non
Non	Cla000151	Unknown	0.375	0.97	0.969	1	0.1	1	1	Non	Non	Non
Sig3.4	Cla000152	Sex-linked	2.08e-05	0	0	233.5	160.1	56	9	Non	Sig	Sig
Non	Cla000153	Ty3-gypsy	0.969	0.97	0.969	1	1	1	1	Non	Non	Non
Non	Cla000154	Unknown	0.969	0.97	0.969	1	1	1	1	Non	Non	Non
Non	Cla000155	Unknown	0.969	0.97	0.375	1	1	1	0.1	Non	Non	Non
Non	Cla000156	Unknown	0.99	0.844	0.99	0.1	0.1	0.2	0.1	Non	Non	Non
Non	Cla000157	Ribosomal	0.841	0.484	0.756	2.4	2.1	4	3.3	Non	Non	Non
Non	Cla000158	Unknown	0.843	0.866	0.903	0.2	0.1	0.1	0.3	Non	Non	Non
Non	Cla000159	Camphor	0.915	0.217	0.61	2.4	2.3	0.3	1.5	Non	Non	Non
Non	Cla000160	Unknown	0.969	0.97	0.969	1	1	1	1	Non	Non	Non
Non	Cla000161	Unknown	0.969	0.97	0.375	1	1	1	0.1	Non	Non	Non
Non	Cla000163	Peptidyl-prolyl	0.99	0.082	0.363	2.2	2.3	7.3	4.8	Non	Non	Non
Non	Cla000164	Unknown	0.969	0.97	0.969	1	1	1	1	Non	Non	Non
Non	Cla000165	Unknown	0.738	0.764	0.739	0.3	0.1	0.1	0.1	Non	Non	Non
Non	Cla000166	Unknown	0.969	0.97	0.969	1	1	1	1	Non	Non	Non
Non	Cla000167	Unknown	0.99	0.844	0.867	0.1	0.1	0.2	0.2	Non	Non	Non
Non	Cla000168	Unknown	0.969	0.97	0.969	1	1	1	1	Non	Non	Non
Non	Cla000169	Unknown	0.969	0.97	0.969	1	1	1	1	Non	Non	Non
Non	Cla000170	Unknown	0.375	0.559	0.375	1	0.1	0.3	0.1	Non	Non	Non
Non	Cla000171	Unknown	0.969	0.97	0.969	1	1	1	1	Non	Non	Non
Non	Cla000172	Unknown	0.872	0.902	0.872	0.3	0.2	0.2	0.2	Non	Non	Non
Non	Cla000173	Unknown	0.969	0.97	0.969	1	1	1	1	Non	Non	Non
Non	Cla000174	Unknown	0.969	0.97	0.969	1	1	1	1	Non	Non	Non
Non	Cla000175	Unknown	0.969	0.97	0.969	1	1	1	1	Non	Non	Non
Non	Cla000176	Unknown	0.969	0.97	0.969	1	1	1	1	Non	Non	Non
Non	Cla000177	Unknown	0.375	0.406	0.589	1	0.1	0.1	0.4	Non	Non	Non
Non	Cla000178	Nuclear	0.994	0.758	0.713	16.4	17.3	17.3	19.6	Non	Non	Non
Non	Cla000179	Unknown	0.375	0.97	0.375	1	0.1	1	0.1	Non	Non	Non
Non	Cla000180	Unknown	0.447	0.406	0.375	1	0.2	0.1	0.1	Non	Non	Non
Non	Cla000181	Zinc	0.504	0.549	0.38	1.2	0.4	0.4	0.2	Non	Non	Non
Non	Cla000182	Unknown	0.969	0.97	0.969	1	1	1	1	Non	Non	Non
Non	Cla000183	Unknown	0.969	0.97	0.969	1	1	1	1	Non	Non	Non
Non	Cla000184	Unknown	0.99	0.376	0.407	0.1	0.1	1	1	Non	Non	Non
Non	Cla000185	Unknown	0.969	0.97	0.969	1	1	1	1	Non	Non	Non
Non	Cla000186	Unknown	0.969	0.97	0.969	1	1	1	1	Non	Non	Non
Non	Cla000187	Unknown	0.969	0.97	0.969	1	1	1	1	Non	Non	Non
Non	Cla000188	Unknown	0.969	0.97	0.969	1	1	1	1	Non	Non	Non
Non	Cla000189	Unknown	0.969	0.97	0.969	1	1	1	1	Non	Non	Non
Non	Cla000190	Unknown	0.99	0.991	0.407	0.1	0.1	0.1	1	Non	Non	Non
Non	Cla000191	Unknown	0.969	0.97	0.969	1	1	1	1	Non	Non	Non
Non	Cla000192	Unknown	0.969	0.97	0.969	1	1	1	1	Non	Non	Non
Non	Cla000193	Unknown	0.969	0.97	0.969	1	1	1	1	Non	Non	Non
Non	Cla000194	Hypothetical	0.72	0.33	0.221	3.2	4.4	5.9	7.5	Non	Non	Non
Non	Cla000195	Unknown	0.969	0.97	0.969	1	1	1	1	Non	Non	Non
Non	Cla000196	Unknown	0.99	0.991	0.867	0.1	0.1	0.1	0.2	Non	Non	Non
Non	Cla000197	Unknown	0.78	0.812	0.657	0.4	0.2	0.2	0.1	Non	Non	Non
Non	Cla000198	Homeobox-leucine	0.818	0.314	0.851	9.3	10.9	13.5	9	Non	Non	Non
Non	Cla000199	Transcriptional	0.936	0.995	0.163	4.2	4.2	4	9.8	Non	Non	Non
Non	Cla000200	Pentatricopeptide	0.84	0.476	0.675	0.8	0.6	1.9	1.5	Non	Non	Non
Non	Cla000201	Unknown	0.969	0.97	0.969	1	1	1	1	Non	Non	Non
Non	Cla000202	Unknown	0.969	0.97	0.969	1	1	1	1	Non	Non	Non
Non	Cla000203	Unknown	0.375	0.97	0.969	1	0.1	1	1	Non	Non	Non
Non	Cla000204	Unknown	0.447	0.406	0.447	1	0.2	0.1	0.2	Non	Non	Non
Non	Cla000205	Calcium-dependent	0.988	0.319	0.282	4.3	4.5	7.4	8.5	Non	Non	Non
Non	Cla000206	Isocitrate	0.99	0.991	0.565	0.1	0.1	0.1	0.6	Non	Non	Non
Non	Cla000207	Unknown	0.969	0.97	0.969	1	1	1	1	Non	Non	Non
Non	Cla000208	Major	0.969	0.97	0.969	1	1	1	1	Non	Non	Non
Non	Cla000209	Unknown	0.969	0.97	0.969	1	1	1	1	Non	Non	Non
Non	Cla000210	Unknown	0.375	0.97	0.969	1	0.1	1	1	Non	Non	Non
Non	Cla000211	Unknown	0.969	0.97	0.969	1	1	1	1	Non	Non	Non
Non	Cla000212	Unknown	0.969	0.97	0.969	1	1	1	1	Non	Non	Non
Non	Cla000213	Unknown	0.407	0.844	0.99	0.1	1	0.2	0.1	Non	Non	Non
Non	Cla000215	Unknown	0.969	0.97	0.969	1	1	1	1	Non	Non	Non
Sig3.4	Cla000216	Expressed	0.749	0.00976	0.00184	12.7	11.8	2.3	1.4	Non	Sig	Sig
Non	Cla000217	Unknown	0.969	0.97	0.969	1	1	1	1	Non	Non	Non
Non	Cla000218	Helix-loop-helix	0.506	0.812	0.703	1	2.3	1.3	1.7	Non	Non	Non
Non	Cla000219	Unknown	0.879	0.456	0.504	0.5	0.7	1.5	1.5	Non	Non	Non
Non	Cla000220	Unknown	0.969	0.97	0.969	1	1	1	1	Non	Non	Non
Non	Cla000221	Unknown	0.969	0.97	0.969	1	1	1	1	Non	Non	Non
Non	Cla000222	Unknown	0.986	0.866	0.843	0.2	0.2	0.1	0.1	Non	Non	Non
Non	Cla000223	Major	0.234	0.497	0.969	15.4	10.1	11.2	16.5	Non	Non	Non
Non	Cla000224	Cytochrome	0.886	0.685	0.887	0.4	0.3	0.1	0.3	Non	Non	Non
Non	Cla000225	Cytochrome	0.752	0.616	0.846	0.7	0.4	0.2	1	Non	Non	Non
Non	Cla000226	Cytochrome	0.886	0.896	0.887	0.4	0.3	0.5	0.3	Non	Non	Non
Non	Cla000228	Cytochrome	0.972	0.89	0.768	0.8	0.8	0.6	0.5	Non	Non	Non
Non	Cla000229	Unknown	0.969	0.97	0.969	1	1	1	1	Non	Non	Non
Non	Cla000230	Cytochrome	0.886	0.59	0.657	0.4	0.3	1	0.1	Non	Non	Non
Non	Cla000231	Unknown	0.969	0.97	0.969	1	1	1	1	Non	Non	Non
Non	Cla000232	Unknown	0.969	0.97	0.969	1	1	1	1	Non	Non	Non
Non	Cla000233	Unknown	0.969	0.97	0.969	1	1	1	1	Non	Non	Non
Non	Cla000234	Cytochrome	0.969	0.97	0.969	1	1	1	1	Non	Non	Non
Non	Cla000236	Unknown	0.968	0.89	0.908	0.8	0.9	0.6	0.7	Non	Non	Non
Non	Cla000237	Unknown	0.969	0.97	0.969	1	1	1	1	Non	Non	Non
Non	Cla000238	Unknown	0.969	0.97	0.969	1	1	1	1	Non	Non	Non
Non	Cla000239	Unknown	0.969	0.97	0.969	1	1	1	1	Non	Non	Non
Non	Cla000240	Internalin	0.799	0.781	0.701	4.3	3.8	4.9	5.8	Non	Non	Non
Non	Cla000241	Unknown	0.969	0.97	0.969	1	1	1	1	Non	Non	Non
Non	Cla000242	Unknown	0.969	0.97	0.969	1	1	1	1	Non	Non	Non
Non	Cla000243	Unknown	0.969	0.97	0.969	1	1	1	1	Non	Non	Non
Non	Cla000244	Unknown	0.903	0.866	0.986	0.2	0.3	0.1	0.2	Non	Non	Non
Non	Cla000245	Unknown	0.969	0.97	0.969	1	1	1	1	Non	Non	Non
Non	Cla000246	Unknown	0.969	0.97	0.969	1	1	1	1	Non	Non	Non
Non	Cla000247	Extradiol	0.774	0.439	0.651	0.9	1.4	0.1	1.7	Non	Non	Non
Non	Cla000248	Unknown	0.969	0.97	0.969	1	1	1	1	Non	Non	Non
Non	Cla000249	Unknown	0.969	0.97	0.969	1	1	1	1	Non	Non	Non
Non	Cla000250	Unknown	0.969	0.97	0.969	1	1	1	1	Non	Non	Non
Non	Cla000251	Unknown	0.969	0.97	0.969	1	1	1	1	Non	Non	Non
Non	Cla000252	Unknown	0.969	0.97	0.969	1	1	1	1	Non	Non	Non
Non	Cla000253	Unknown	0.969	0.97	0.969	1	1	1	1	Non	Non	Non
Non	Cla000254	Sucrose	0.969	0.97	0.969	1	1	1	1	Non	Non	Non
Non	Cla000255	Unknown	0.969	0.97	0.969	1	1	1	1	Non	Non	Non
Non	Cla000256	Unknown	0.138	0.21	0.257	0.2	2.9	2	1.9	Non	Non	Non
Non	Cla000257	Unknown	0.969	0.97	0.969	1	1	1	1	Non	Non	Non
Sig3.4	Cla000258	UDP-glucose	0.836	0.000307	9.01e-11	60.8	66.7	25.1	164.2	Non	Sig	Sig
Non	Cla000259	Gag/pol	0.375	0.97	0.969	1	0.1	1	1	Non	Non	Non
Non	Cla000260	Unknown	0.969	0.97	0.375	1	1	1	0.1	Non	Non	Non
Non	Cla000261	Unknown	0.969	0.97	0.969	1	1	1	1	Non	Non	Non
Non	Cla000262	Unknown	0.407	0.376	0.99	0.1	1	1	0.1	Non	Non	Non
Non	Cla000263	Membrane	0.969	0.406	0.969	1	1	0.1	1	Non	Non	Non
Non	Cla000264	Membrane	0.952	0.119	0.254	3.9	4.3	9.2	8.2	Non	Non	Non
Non	Cla000265	Membrane	0.375	0.406	0.375	1	0.1	0.1	0.1	Non	Non	Non
Non	Cla000266	Pentatricopeptide	0.832	0.734	0.754	6.5	6.1	7.4	8.1	Non	Non	Non
Non	Cla000267	Pentatricopeptide	0.911	0.701	0.807	0.8	1	1.3	1.2	Non	Non	Non
Non	Cla000268	Unknown	0.969	0.97	0.969	1	1	1	1	Non	Non	Non
Non	Cla000269	Unknown	0.969	0.97	0.969	1	1	1	1	Non	Non	Non
Non	Cla000270	Unknown	0.985	0.417	0.562	1.2	1.3	2.7	2.4	Non	Non	Non
Non	Cla000271	Unknown	0.969	0.97	0.375	1	1	1	0.1	Non	Non	Non
Non	Cla000272	Unknown	0.969	0.97	0.969	1	1	1	1	Non	Non	Non
Non	Cla000273	Unknown	0.847	0.732	0.325	2.9	2.6	3.6	6.1	Non	Non	Non
Non	Cla000274	Heat	0.965	0.763	0.503	10.3	11.1	8.5	14.3	Non	Non	Non
Non	Cla000275	Unknown	0.969	0.97	0.969	1	1	1	1	Non	Non	Non
Non	Cla000276	Unknown	0.903	0.866	0.986	0.2	0.3	0.1	0.2	Non	Non	Non
Non	Cla000277	Unknown	0.969	0.97	0.969	1	1	1	1	Non	Non	Non
Non	Cla000278	Unknown	0.969	0.97	0.969	1	1	1	1	Non	Non	Non
Non	Cla000279	Unknown	0.969	0.97	0.969	1	1	1	1	Non	Non	Non
Non	Cla000280	Unknown	0.99	0.376	0.99	0.1	0.1	1	0.1	Non	Non	Non
Non	Cla000281	Phytochrome	0.694	0.48	0.188	8	6.9	5.1	3.8	Non	Non	Non
Non	Cla000282	Unknown	0.969	0.97	0.969	1	1	1	1	Non	Non	Non
Non	Cla000283	Unknown	0.969	0.97	0.969	1	1	1	1	Non	Non	Non
Non	Cla000284	Unknown	0.969	0.97	0.969	1	1	1	1	Non	Non	Non
Non	Cla000285	Unknown	0.969	0.97	0.969	1	1	1	1	Non	Non	Non
Non	Cla000286	Unknown	0.99	0.376	0.99	0.1	0.1	1	0.1	Non	Non	Non
Non	Cla000288	Unknown	0.969	0.97	0.969	1	1	1	1	Non	Non	Non
Non	Cla000289	Unknown	0.969	0.97	0.969	1	1	1	1	Non	Non	Non
Non	Cla000290	Unknown	0.654	0.733	0.983	0.3	0.8	0.6	0.3	Non	Non	Non
Non	Cla000291	Unknown	0.969	0.97	0.969	1	1	1	1	Non	Non	Non
Non	Cla000293	Unknown	0.375	0.406	0.969	1	0.1	0.1	1	Non	Non	Non
Non	Cla000294	Unknown	0.969	0.97	0.969	1	1	1	1	Non	Non	Non
Non	Cla000295	Unknown	0.969	0.97	0.969	1	1	1	1	Non	Non	Non
Non	Cla000296	Unknown	0.969	0.97	0.969	1	1	1	1	Non	Non	Non
Non	Cla000297	Unknown	0.867	0.991	0.99	0.1	0.2	0.1	0.1	Non	Non	Non
Non	Cla000298	Unknown	0.969	0.97	0.969	1	1	1	1	Non	Non	Non
Non	Cla000299	Unknown	0.969	0.97	0.969	1	1	1	1	Non	Non	Non
Non	Cla000301	Unknown	0.738	0.018	0.56	0.3	0.1	6.1	1	Non	Non	Non
Non	Cla000302	Splicing	0.992	0.447	0.932	8	8.5	10.8	8.1	Non	Non	Non
Non	Cla000303	60s	0.969	0.97	0.969	1	1	1	1	Non	Non	Non
Sig3	Cla000304	Pseudo-response	0.371	0.031	0.095	25.6	20.8	11.5	16	Non	Sig	Non
Non	Cla000305	NHL1	0.667	0.794	0.913	1.6	2.6	1.1	1.9	Non	Non	Non
Non	Cla000306	Unknown	0.945	0.982	0.592	3	3	2.9	4.7	Non	Non	Non
Non	Cla000308	NPL4	0.693	0.637	0.406	1.9	2.9	2.8	4.1	Non	Non	Non
Non	Cla000309	Peptidase	0.433	0.695	0.891	1.2	2.9	1.8	1.5	Non	Non	Non
Sig4	Cla000310	Unknown	0.138	0.301	0.0037	15.3	8.7	9.5	3.3	Non	Non	Sig
Sig3	Cla000311	Mitochondrial	0.76	0.045	0.488	9.7	8.9	19.8	13.7	Non	Sig	Non
Sig4	Cla000312	Nascent	0.476	0.107	0.01	11	8.4	4.3	2.1	Non	Non	Sig
Non	Cla000313	Unknown	0.967	0.817	0.796	1.1	1.1	1.4	1.6	Non	Non	Non
Non	Cla000314	Ty3-gypsy	0.969	0.97	0.969	1	1	1	1	Non	Non	Non
Non	Cla000315	Ankyrin	0.518	0.622	0.321	20.4	26.1	22.5	28.7	Non	Non	Non
Non	Cla000316	Unknown	0.969	0.97	0.969	1	1	1	1	Non	Non	Non
Non	Cla000317	Unknown	0.969	0.97	0.969	1	1	1	1	Non	Non	Non
Non	Cla000318	Unknown	0.756	0.781	0.944	2.4	3.3	2.9	2.7	Non	Non	Non
Non	Cla000319	Unknown	0.916	0.896	0.996	1.6	1.5	1.3	1.7	Non	Non	Non
Non	Cla000320	MYB	0.969	0.406	0.969	1	1	0.1	1	Non	Non	Non
Non	Cla000321	Unknown	0.969	0.97	0.969	1	1	1	1	Non	Non	Non
Non	Cla000322	Unknown	0.969	0.97	0.969	1	1	1	1	Non	Non	Non
Non	Cla000323	At4g40080-like	0.871	0.538	0.959	1.7	1.5	2.9	1.7	Non	Non	Non
Non	Cla000324	Unknown	0.969	0.97	0.969	1	1	1	1	Non	Non	Non
Non	Cla000325	Riboflavin	0.964	0.637	0.393	4.1	4.2	5.3	7.3	Non	Non	Non
Non	Cla000326	Unknown	0.969	0.97	0.969	1	1	1	1	Non	Non	Non
Non	Cla000327	Unknown	0.969	0.97	0.969	1	1	1	1	Non	Non	Non
Non	Cla000328	Unknown	0.969	0.97	0.969	1	1	1	1	Non	Non	Non
Non	Cla000330	Calcium-dependent	0.762	0.882	0.581	2.5	3.4	2.7	4.1	Non	Non	Non
Non	Cla000331	Ell-associated	0.901	0.604	0.614	3	3.5	4.2	4.6	Non	Non	Non
Non	Cla000332	Unknown	0.983	0.764	0.739	0.3	0.3	0.1	0.1	Non	Non	Non
Non	Cla000333	Acyl	0.761	0.547	0.75	2.3	1.8	1.1	3.2	Non	Non	Non
Non	Cla000334	Unknown	0.969	0.97	0.969	1	1	1	1	Non	Non	Non
Non	Cla000335	Unknown	0.986	0.873	0.986	0.2	0.2	0.3	0.2	Non	Non	Non
Non	Cla000336	Unknown	0.969	0.97	0.969	1	1	1	1	Non	Non	Non
Non	Cla000337	Self-incompatibility	0.969	0.97	0.969	1	1	1	1	Non	Non	Non
Non	Cla000338	Cysteine	0.969	0.406	0.375	1	1	0.1	0.1	Non	Non	Non
Non	Cla000339	Unknown	0.969	0.97	0.969	1	1	1	1	Non	Non	Non
Non	Cla000340	mRNA	0.851	0.854	0.626	3.2	3.9	3.5	4.8	Non	Non	Non
Non	Cla000341	Chaperone	0.457	0.235	0.271	1.2	2.8	3.7	3.8	Non	Non	Non
Non	Cla000342	Beta-1,3-galactosyl-O-glycosyl-glycoprotein	0.64	0.993	0.387	2.3	3.6	2.2	4.8	Non	Non	Non
Non	Cla000343	Unknown	0.986	0.873	0.986	0.2	0.2	0.3	0.2	Non	Non	Non
Non	Cla000344	Unknown	0.969	0.406	0.375	1	1	0.1	0.1	Non	Non	Non
Non	Cla000345	Unknown	0.969	0.97	0.969	1	1	1	1	Non	Non	Non
Non	Cla000346	Lecithin	0.801	0.109	0.094	3.3	4.2	8.5	9.7	Non	Non	Non
Non	Cla000347	Unknown	0.962	0.796	0.974	0.7	0.8	0.4	0.7	Non	Non	Non
Non	Cla000348	Lecithin	0.485	0.075	0.084	3.5	5.9	9.6	10.3	Non	Non	Non
Non	Cla000349	Unknown	0.969	0.97	0.969	1	1	1	1	Non	Non	Non
Non	Cla000350	Unknown	0.969	0.97	0.969	1	1	1	1	Non	Non	Non
Non	Cla000351	Unknown	0.969	0.97	0.969	1	1	1	1	Non	Non	Non
Non	Cla000352	Unknown	0.886	0.685	0.98	0.4	0.3	0.1	0.4	Non	Non	Non
Non	Cla000353	Unknown	0.969	0.97	0.969	1	1	1	1	Non	Non	Non
Non	Cla000354	Peptide	0.949	0.093	0.827	18.9	20.4	29.3	21.4	Non	Non	Non
Non	Cla000355	Unknown	0.969	0.97	0.969	1	1	1	1	Non	Non	Non
Non	Cla000356	Unknown	0.969	0.97	0.969	1	1	1	1	Non	Non	Non
Non	Cla000357	Unknown	0.969	0.97	0.375	1	1	1	0.1	Non	Non	Non
Non	Cla000358	Unknown	0.969	0.97	0.969	1	1	1	1	Non	Non	Non
Non	Cla000359	Sucrose	0.969	0.97	0.969	1	1	1	1	Non	Non	Non
Non	Cla000360	Unknown	0.969	0.97	0.969	1	1	1	1	Non	Non	Non
Non	Cla000361	Unknown	0.407	0.991	0.407	0.1	1	0.1	1	Non	Non	Non
Non	Cla000362	Unknown	0.969	0.97	0.969	1	1	1	1	Non	Non	Non
Non	Cla000363	Unknown	0.969	0.97	0.969	1	1	1	1	Non	Non	Non
Non	Cla000364	Unknown	0.969	0.97	0.969	1	1	1	1	Non	Non	Non
Non	Cla000365	Unknown	0.969	0.97	0.969	1	1	1	1	Non	Non	Non
Non	Cla000366	Acetolactate	0.913	0.632	0.954	10.9	11	12.6	11.8	Non	Non	Non
Non	Cla000367	Unknown	0.375	0.483	0.589	1	0.1	0.2	0.4	Non	Non	Non
Non	Cla000368	Unknown	0.969	0.483	0.375	1	1	0.2	0.1	Non	Non	Non
Non	Cla000369	Unknown	0.447	0.406	0.375	1	0.2	0.1	0.1	Non	Non	Non
Non	Cla000370	Unknown	0.969	0.97	0.969	1	1	1	1	Non	Non	Non
Non	Cla000371	Equilibrative	0.395	0.717	0.886	14	19.9	11.5	15.6	Non	Non	Non
Non	Cla000372	Unknown	0.969	0.97	0.969	1	1	1	1	Non	Non	Non
Non	Cla000373	Unknown	0.969	0.406	0.79	1	1	0.1	0.7	Non	Non	Non
Non	Cla000374	Carboxypeptidase	0.99	0.376	0.99	0.1	0.1	1	0.1	Non	Non	Non
Non	Cla000375	Unknown	0.969	0.97	0.969	1	1	1	1	Non	Non	Non
Non	Cla000376	Unknown	0.735	0.947	0.926	5.6	4.8	5.1	5.6	Non	Non	Non
Non	Cla000377	Unknown	0.969	0.97	0.969	1	1	1	1	Non	Non	Non
Non	Cla000378	NAC	0.779	0.946	0.637	0.6	1	0.5	0.2	Non	Non	Non
Non	Cla000379	Unknown	0.969	0.97	0.969	1	1	1	1	Non	Non	Non
Non	Cla000380	Unknown	0.375	0.406	0.375	1	0.1	0.1	0.1	Non	Non	Non
Non	Cla000381	Unknown	0.99	0.991	0.867	0.1	0.1	0.1	0.2	Non	Non	Non
Non	Cla000382	COP9	0.835	0.236	0.375	2.8	3.5	6.1	5.6	Non	Non	Non
Non	Cla000383	BZIP	0.909	0.325	0.092	5.3	6	8.6	13	Non	Non	Non
Non	Cla000385	Ribosome	0.872	0.887	0.709	0.3	0.2	0.4	0.7	Non	Non	Non
Non	Cla000386	AAA	0.941	0.812	0.916	2.3	2.6	2.7	2.2	Non	Non	Non
Non	Cla000387	Asparagine	0.647	0.263	0.647	2.4	3.7	5.3	3.7	Non	Non	Non
Non	Cla000389	Pentatricopeptide	0.661	0.399	0.42	3	4.4	5.2	5.6	Non	Non	Non
Non	Cla000390	Ureide	0.53	0.792	0.22	3	5	3.5	7.2	Non	Non	Non
Non	Cla000391	Ureide	0.577	0.238	0.1	3.1	4.9	0.7	0.2	Non	Non	Non
Non	Cla000392	Unknown	0.969	0.97	0.969	1	1	1	1	Non	Non	Non
Non	Cla000393	Glucan	0.494	0.093	0.011	9	12.8	2.9	1.2	Non	Non	Non
Non	Cla000394	Phosphate	0.463	0.467	0.142	2.1	4.1	3.7	6.7	Non	Non	Non
Non	Cla000395	Unknown	0.831	0.69	0.618	0.7	0.5	1.2	1.5	Non	Non	Non
Non	Cla000396	14-3-3-like	0.818	0.145	0.087	3.3	2.9	0.4	0.2	Non	Non	Non
Non	Cla000397	Dehydration-responsive	0.87	0.658	0.917	10.5	11.9	8.1	11.6	Non	Non	Non
Non	Cla000398	Unknown	0.375	0.97	0.969	1	0.1	1	1	Non	Non	Non
Non	Cla000399	Unknown	0.969	0.97	0.969	1	1	1	1	Non	Non	Non
Non	Cla000400	Unknown	0.375	0.97	0.375	1	0.1	1	0.1	Non	Non	Non
Non	Cla000401	Unknown	0.969	0.97	0.969	1	1	1	1	Non	Non	Non
Non	Cla000402	Unknown	0.969	0.97	0.969	1	1	1	1	Non	Non	Non
Non	Cla000403	Unknown	0.375	0.97	0.969	1	0.1	1	1	Non	Non	Non
Non	Cla000404	Unknown	0.375	0.97	0.375	1	0.1	1	0.1	Non	Non	Non
Non	Cla000405	Unknown	0.99	0.991	0.99	0.1	0.1	0.1	0.1	Non	Non	Non
Non	Cla000406	Unknown	0.99	0.376	0.99	0.1	0.1	1	0.1	Non	Non	Non
Non	Cla000407	Unknown	0.969	0.97	0.969	1	1	1	1	Non	Non	Non
Non	Cla000408	Unknown	0.375	0.97	0.969	1	0.1	1	1	Non	Non	Non
Non	Cla000409	Reductase	0.969	0.97	0.969	1	1	1	1	Non	Non	Non
Non	Cla000410	Unknown	0.969	0.97	0.375	1	1	1	0.1	Non	Non	Non
Non	Cla000411	Unknown	0.969	0.97	0.969	1	1	1	1	Non	Non	Non
Non	Cla000412	Unknown	0.969	0.97	0.969	1	1	1	1	Non	Non	Non
Non	Cla000413	Unknown	0.969	0.97	0.969	1	1	1	1	Non	Non	Non
Non	Cla000414	Unknown	0.375	0.483	0.375	1	0.1	0.2	0.1	Non	Non	Non
Non	Cla000415	Unknown	0.969	0.97	0.969	1	1	1	1	Non	Non	Non
Non	Cla000416	Unknown	0.98	0.821	0.863	0.4	0.4	0.6	0.6	Non	Non	Non
Non	Cla000417	Metallothionein-II	0.969	0.97	0.785	1	1	1	1.5	Non	Non	Non
Non	Cla000418	Unknown	0.969	0.97	0.969	1	1	1	1	Non	Non	Non
Non	Cla000419	Unknown	0.969	0.97	0.969	1	1	1	1	Non	Non	Non
Non	Cla000420	Polygalacturonase	0.969	0.97	0.969	1	1	1	1	Non	Non	Non
Non	Cla000421	Unknown	0.969	0.97	0.969	1	1	1	1	Non	Non	Non
Non	Cla000422	UDP-glycosyltransferase	0.831	0.709	0.58	0.7	0.5	0.3	0.2	Non	Non	Non
Non	Cla000423	Unknown	0.969	0.97	0.969	1	1	1	1	Non	Non	Non
Non	Cla000424	Chloroplast	0.961	0.673	0.146	9	9.3	6.9	4.1	Non	Non	Non
Non	Cla000425	Unknown	0.969	0.97	0.969	1	1	1	1	Non	Non	Non
Non	Cla000426	Unknown	0.969	0.97	0.969	1	1	1	1	Non	Non	Non
Non	Cla000427	Unknown	0.969	0.97	0.969	1	1	1	1	Non	Non	Non
Non	Cla000428	Gag/pol	0.969	0.97	0.969	1	1	1	1	Non	Non	Non
Non	Cla000429	Pyrimidine-specific	0.792	0.31	0.152	3.7	4.7	6.7	9.2	Non	Non	Non
Non	Cla000430	Unknown	0.969	0.97	0.969	1	1	1	1	Non	Non	Non
Non	Cla000431	Unknown	0.99	0.991	0.99	0.1	0.1	0.1	0.1	Non	Non	Non
Non	Cla000432	Unknown	0.375	0.97	0.969	1	0.1	1	1	Non	Non	Non
Non	Cla000433	Unknown	0.804	0.841	0.978	0.5	0.3	0.3	0.5	Non	Non	Non
Non	Cla000434	Histone-lysine	0.765	0.921	0.513	16.6	19.4	16.3	21.7	Non	Non	Non
Non	Cla000435	Unknown	0.817	0.736	0.591	0.5	0.8	0.2	0.1	Non	Non	Non
Non	Cla000436	Unknown	0.969	0.97	0.969	1	1	1	1	Non	Non	Non
Non	Cla000437	Unknown	0.407	0.376	0.407	0.1	1	1	1	Non	Non	Non
Non	Cla000438	Unknown	0.969	0.97	0.969	1	1	1	1	Non	Non	Non
Non	Cla000439	Unknown	0.969	0.97	0.969	1	1	1	1	Non	Non	Non
Non	Cla000440	Unknown	0.969	0.97	0.969	1	1	1	1	Non	Non	Non
Non	Cla000441	Unknown	0.969	0.97	0.969	1	1	1	1	Non	Non	Non
Non	Cla000442	Unknown	0.969	0.97	0.969	1	1	1	1	Non	Non	Non
Non	Cla000443	Vacuolar	0.375	0.97	0.375	1	0.1	1	0.1	Non	Non	Non
Non	Cla000444	Unknown	0.969	0.97	0.969	1	1	1	1	Non	Non	Non
Non	Cla000445	Unknown	0.621	0.445	0.565	0.1	0.5	0.8	0.6	Non	Non	Non
Non	Cla000446	Unknown	0.969	0.97	0.969	1	1	1	1	Non	Non	Non
Non	Cla000447	Unknown	0.969	0.97	0.969	1	1	1	1	Non	Non	Non
Non	Cla000448	Hydrolase	0.969	0.97	0.969	1	1	1	1	Non	Non	Non
Non	Cla000449	Unknown	0.969	0.97	0.969	1	1	1	1	Non	Non	Non
Non	Cla000450	Unknown	0.969	0.97	0.969	1	1	1	1	Non	Non	Non
Non	Cla000451	Unknown	0.969	0.97	0.969	1	1	1	1	Non	Non	Non
Non	Cla000452	Unknown	0.765	0.991	0.99	0.1	0.3	0.1	0.1	Non	Non	Non
Non	Cla000453	THO	0.826	0.617	0.763	4.2	3.8	5.5	5.4	Non	Non	Non
Non	Cla000454	Unknown	0.686	0.739	0.686	0.1	0.4	0.3	0.4	Non	Non	Non
Non	Cla000455	THO	0.788	0.368	0.369	3.4	2.9	5.9	6.5	Non	Non	Non
Non	Cla000456	Choline/ethanolamine	0.99	0.376	0.407	0.1	0.1	1	1	Non	Non	Non
Non	Cla000457	Gag	0.99	0.376	0.407	0.1	0.1	1	1	Non	Non	Non
Non	Cla000458	Unknown	0.617	0.78	0.737	0.2	0.7	0.4	0.5	Non	Non	Non
Non	Cla000459	Unknown	0.969	0.97	0.969	1	1	1	1	Non	Non	Non
Non	Cla000460	Unknown	0.901	0.862	0.637	0.6	0.5	0.4	0.2	Non	Non	Non
Non	Cla000461	DNA-directed	0.752	0.848	0.974	0.7	0.4	0.9	0.7	Non	Non	Non
Non	Cla000462	Germacrene-D	0.635	0.754	0.353	2.2	1.4	1.5	0.7	Non	Non	Non
Non	Cla000463	(-)-germacrene	0.59	0.659	0.708	0.5	0.1	1	1	Non	Non	Non
Non	Cla000464	Receptor-like	0.543	0.28	0.873	3.9	6.1	1.3	4.6	Non	Non	Non
Sig4	Cla000465	50S	0.525	0.203	0.000112	45.1	41.6	31.9	16.5	Non	Non	Sig
Non	Cla000466	Dihydroflavonol-4-reductase	0.589	0.97	0.969	1	0.4	1	1	Non	Non	Non
Sig3.4	Cla000467	Os04g0690100	0.791	0.00961	0.00534	17.1	16.5	4.5	4.7	Non	Sig	Sig
Non	Cla000468	Unknown	0.99	0.376	0.407	0.1	0.1	1	1	Non	Non	Non
Non	Cla000469	DNA-damage-inducible	0.969	0.97	0.969	1	1	1	1	Non	Non	Non
Non	Cla000470	Unknown	0.969	0.97	0.969	1	1	1	1	Non	Non	Non
Non	Cla000471	Unknown	0.969	0.97	0.969	1	1	1	1	Non	Non	Non
Non	Cla000472	Nudix	0.396	0.794	0.954	1.6	3.7	1.1	1.8	Non	Non	Non
Non	Cla000473	Unknown	0.969	0.97	0.969	1	1	1	1	Non	Non	Non
Non	Cla000474	Unknown	0.923	0.902	0.983	0.3	0.4	0.2	0.3	Non	Non	Non
Non	Cla000475	Late	0.969	0.97	0.969	1	1	1	1	Non	Non	Non
Non	Cla000476	Unknown	0.843	0.866	0.843	0.2	0.1	0.1	0.1	Non	Non	Non
Non	Cla000477	Unknown	0.969	0.97	0.375	1	1	1	0.1	Non	Non	Non
Non	Cla000478	Elongation	0.407	0.991	0.867	0.1	1	0.1	0.2	Non	Non	Non
Non	Cla000479	Zinc	0.678	0.102	0.383	11.3	14.1	4.4	8	Non	Non	Non
Sig4	Cla000480	Dimethylaniline	0.165	0.757	0.048	15.4	25.4	13	30	Non	Non	Sig
Sig3	Cla000481	Unknown	0.447	0.018	0.218	3.7	6.4	12.9	8.3	Non	Sig	Non
Non	Cla000482	Unknown	0.969	0.97	0.969	1	1	1	1	Non	Non	Non
Non	Cla000483	1-aminocyclopropane-1-carboxylate	0.863	0.685	0.635	0.4	0.6	0.1	1	Non	Non	Non
Non	Cla000484	Unknown	0.867	0.991	0.99	0.1	0.2	0.1	0.1	Non	Non	Non
Non	Cla000485	Unknown	0.886	0.812	0.657	0.4	0.3	0.2	0.1	Non	Non	Non
Non	Cla000486	Unknown	0.969	0.97	0.969	1	1	1	1	Non	Non	Non
Non	Cla000487	Unknown	0.969	0.97	0.969	1	1	1	1	Non	Non	Non
Non	Cla000489	Unknown	0.407	0.376	0.99	0.1	1	1	0.1	Non	Non	Non
Sig4	Cla000490	Unknown	0.891	0.942	0.00862	20.5	22.6	19	7.4	Non	Non	Sig
Non	Cla000491	Unknown	0.969	0.97	0.969	1	1	1	1	Non	Non	Non
Non	Cla000492	Unknown	0.843	0.866	0.843	0.2	0.1	0.1	0.1	Non	Non	Non
Non	Cla000493	Ty3-gypsy	0.969	0.97	0.969	1	1	1	1	Non	Non	Non
Non	Cla000494	Unknown	0.867	0.376	0.99	0.1	0.2	1	0.1	Non	Non	Non
Non	Cla000495	Unknown	0.969	0.97	0.969	1	1	1	1	Non	Non	Non
Non	Cla000496	Sieve	0.677	0.466	0.509	3.3	4.7	5.2	5.5	Non	Non	Non
Sig4	Cla000497	Homology	0.513	0.125	0.033	2.2	4	6.5	10	Non	Non	Sig
Non	Cla000498	Unknown	0.969	0.97	0.969	1	1	1	1	Non	Non	Non
Non	Cla000499	Unknown	0.969	0.97	0.969	1	1	1	1	Non	Non	Non
Non	Cla000500	Unknown	0.969	0.97	0.969	1	1	1	1	Non	Non	Non
Non	Cla000501	Unknown	0.969	0.97	0.969	1	1	1	1	Non	Non	Non
Non	Cla000502	Polygalacturonase	0.969	0.97	0.969	1	1	1	1	Non	Non	Non
Non	Cla000503	Polygalacturonase	0.969	0.97	0.969	1	1	1	1	Non	Non	Non
Non	Cla000504	Polygalacturonase	0.969	0.97	0.969	1	1	1	1	Non	Non	Non
Non	Cla000505	Unknown	0.969	0.97	0.969	1	1	1	1	Non	Non	Non
Non	Cla000506	Polygalacturonase	0.969	0.97	0.969	1	1	1	1	Non	Non	Non
Non	Cla000507	Unknown	0.969	0.97	0.969	1	1	1	1	Non	Non	Non
Non	Cla000508	Unknown	0.969	0.97	0.969	1	1	1	1	Non	Non	Non
Non	Cla000509	Unknown	0.969	0.97	0.969	1	1	1	1	Non	Non	Non
Non	Cla000510	Unknown	0.969	0.97	0.969	1	1	1	1	Non	Non	Non
Non	Cla000511	Unknown	0.983	0.984	0.872	0.3	0.3	0.3	0.2	Non	Non	Non
Non	Cla000512	Unknown	0.969	0.97	0.969	1	1	1	1	Non	Non	Non
Non	Cla000513	Chlorophyll	0.706	0.325	0.356	14.3	17.3	19.1	10.4	Non	Non	Non
Non	Cla000514	Unknown	0.728	0.771	0.637	0.6	1.1	0.3	0.2	Non	Non	Non
Non	Cla000515	Proton	0.457	0.561	0.413	16.5	22.2	12.6	22.7	Non	Non	Non
Non	Cla000516	Squamosa	0.899	0.905	0.059	22.2	22.6	20.3	38.6	Non	Non	Non
Non	Cla000517	Receptor-like	0.583	0.251	0.221	3.2	5	0.8	7.5	Non	Non	Non
Non	Cla000519	TMV	0.969	0.97	0.969	1	1	1	1	Non	Non	Non
Non	Cla000520	Tetratricopeptide	0.486	0.313	0.268	17.1	22.6	22.4	25.5	Non	Non	Non
Non	Cla000521	Hydroxyproline-rich	0.988	0.331	0.472	11.8	12.4	16.2	16.4	Non	Non	Non
Non	Cla000522	Integral	0.874	0.661	0.905	10.8	12.2	12.3	12	Non	Non	Non
Non	Cla000524	60S	0.969	0.97	0.969	1	1	1	1	Non	Non	Non
Non	Cla000525	DNAJ	0.931	0.342	0.119	2	2.3	4.2	6.9	Non	Non	Non
Non	Cla000526	UPF0047	0.871	0.613	0.526	26.4	26.7	28.7	23.3	Non	Non	Non
Non	Cla000527	Phosphodiesterase/alkaline	0.698	0.505	0.805	2.8	4	4.4	3.6	Non	Non	Non
Non	Cla000528	Alkaline	0.431	0.531	0.729	2.9	5.4	4.4	4	Non	Non	Non
Non	Cla000529	Unknown	0.969	0.97	0.969	1	1	1	1	Non	Non	Non
Non	Cla000530	Beta-galactosidase	0.969	0.97	0.969	1	1	1	1	Non	Non	Non
Non	Cla000531	Unknown	0.969	0.97	0.969	1	1	1	1	Non	Non	Non
Non	Cla000532	Unknown	0.734	0.191	0.337	2.6	2	0.3	0.9	Non	Non	Non
Non	Cla000533	Unknown	0.969	0.97	0.969	1	1	1	1	Non	Non	Non
Non	Cla000534	Unknown	0.375	0.406	0.375	1	0.1	0.1	0.1	Non	Non	Non
Non	Cla000535	Peroxidase	0.256	0.132	0.172	3.7	1.3	0.5	0.9	Non	Non	Non
Non	Cla000536	Unknown	0.969	0.97	0.969	1	1	1	1	Non	Non	Non
Non	Cla000537	Unknown	0.969	0.97	0.969	1	1	1	1	Non	Non	Non
Non	Cla000538	Unknown	0.969	0.97	0.969	1	1	1	1	Non	Non	Non
Non	Cla000540	Dof	0.57	0.477	0.418	2.4	1.4	1	1	Non	Non	Non
Non	Cla000541	Ribosomal	0.283	0.402	0.192	9.7	5.9	13.1	17.2	Non	Non	Non
Non	Cla000542	tRNA-splicing	0.968	0.854	0.76	0.8	0.9	1	1.3	Non	Non	Non
Non	Cla000543	Interactor	0.743	0.337	0.329	3.7	4.9	1.4	1.6	Non	Non	Non
Non	Cla000544	Senescence-associated	0.687	0.799	0.687	3.5	4.9	4	4.9	Non	Non	Non
Non	Cla000545	LOB	0.752	0.378	0.128	0.7	0.4	2.1	4.2	Non	Non	Non
Non	Cla000546	Ubiquitin-protein	0.548	0.253	0.095	1.8	3.3	4.5	7	Non	Non	Non
Non	Cla000547	Ubiquitin-protein	0.566	0.487	0.476	0.1	0.6	0.7	0.8	Non	Non	Non
Non	Cla000548	Hydrolase	0.155	0.902	0.812	14.6	24.6	14.5	16.8	Non	Non	Non
Non	Cla000549	MaoC	0.932	0.793	0.913	1.1	1.3	0.7	1	Non	Non	Non
Non	Cla000550	Adenylate	0.721	0.25	0.613	4.6	3.8	8.4	6.6	Non	Non	Non
Non	Cla000551	Vicilin	0.871	0.724	0.999	1.7	1.5	2.3	1.8	Non	Non	Non
Non	Cla000552	Protein	0.879	0.614	0.319	2.6	2.4	3.7	5.7	Non	Non	Non
Non	Cla000553	Elongation	0.905	0.517	0.487	0.7	0.6	0.1	0.1	Non	Non	Non
Non	Cla000554	Unknown	0.56	0.142	0.119	0.3	1	2.8	3.4	Non	Non	Non
Sig4	Cla000557	Auxin	0.687	0.503	0.015	13.9	17	10	4.1	Non	Non	Sig
Non	Cla000558	Unknown	0.886	0.812	0.797	0.4	0.3	0.2	0.7	Non	Non	Non
Non	Cla000559	OTU	0.969	0.97	0.969	1	1	1	1	Non	Non	Non
Non	Cla000560	Unknown	0.969	0.97	0.969	1	1	1	1	Non	Non	Non
Non	Cla000562	Flavoprotein	0.943	0.377	0.855	4.7	5.2	2.2	4.4	Non	Non	Non
Sig3	Cla000563	Phloem	0.00219	4.56e-14	0.02	278.7	224.1	464.6	354.9	Non	Sig	Non
Non	Cla000564	Unknown	0.969	0.97	0.969	1	1	1	1	Non	Non	Non
Non	Cla000565	Unknown	0.969	0.97	0.375	1	1	1	0.1	Non	Non	Non
Non	Cla000567	Unknown	0.843	0.448	0.484	0.2	0.1	1	1	Non	Non	Non
Non	Cla000568	Zinc	0.969	0.97	0.969	1	1	1	1	Non	Non	Non
Non	Cla000569	Major	0.969	0.97	0.969	1	1	1	1	Non	Non	Non
Non	Cla000570	Unknown	0.375	0.406	0.969	1	0.1	0.1	1	Non	Non	Non
Non	Cla000571	Ty3-gypsy	0.969	0.97	0.969	1	1	1	1	Non	Non	Non
Non	Cla000572	Unknown	0.969	0.97	0.969	1	1	1	1	Non	Non	Non
Non	Cla000573	Unknown	0.969	0.97	0.969	1	1	1	1	Non	Non	Non
Non	Cla000574	Unknown	0.969	0.97	0.969	1	1	1	1	Non	Non	Non
Non	Cla000575	Phosphatidylinositol-4-phosphate	0.679	0.361	0.631	2.9	4.2	5.3	4.4	Non	Non	Non
Non	Cla000576	Unknown	0.99	0.991	0.407	0.1	0.1	0.1	1	Non	Non	Non
Non	Cla000577	Unknown	0.937	0.685	0.887	0.4	0.5	0.1	0.3	Non	Non	Non
Non	Cla000578	Phosphatidylinositol-4-phosphate	0.574	0.308	0.624	10.7	14.2	15.2	13.8	Non	Non	Non
Non	Cla000579	Unknown	0.969	0.97	0.969	1	1	1	1	Non	Non	Non
Non	Cla000580	Unknown	0.969	0.97	0.969	1	1	1	1	Non	Non	Non
Non	Cla000581	Unknown	0.969	0.97	0.969	1	1	1	1	Non	Non	Non
Non	Cla000582	Myb	0.607	0.787	0.093	6.2	4.8	5	14.4	Non	Non	Non
Non	Cla000583	Unknown	0.983	0.764	0.872	0.3	0.3	0.1	0.2	Non	Non	Non
Non	Cla000584	Unknown	0.969	0.97	0.969	1	1	1	1	Non	Non	Non
Non	Cla000585	Expansin	0.99	0.376	0.407	0.1	0.1	1	1	Non	Non	Non
Non	Cla000586	Unknown	0.969	0.97	0.969	1	1	1	1	Non	Non	Non
Non	Cla000587	Unknown	0.969	0.97	0.969	1	1	1	1	Non	Non	Non
Non	Cla000588	Unknown	0.969	0.97	0.969	1	1	1	1	Non	Non	Non
Non	Cla000589	Unknown	0.969	0.97	0.969	1	1	1	1	Non	Non	Non
Non	Cla000590	Unknown	0.969	0.97	0.969	1	1	1	1	Non	Non	Non
Non	Cla000591	Unknown	0.375	0.97	0.969	1	0.1	1	1	Non	Non	Non
Non	Cla000592	Unknown	0.969	0.97	0.969	1	1	1	1	Non	Non	Non
Non	Cla000593	Unknown	0.99	0.991	0.99	0.1	0.1	0.1	0.1	Non	Non	Non
Non	Cla000594	Unknown	0.986	0.987	0.986	0.2	0.2	0.2	0.2	Non	Non	Non
Non	Cla000595	Unknown	0.969	0.97	0.969	1	1	1	1	Non	Non	Non
Non	Cla000596	Unknown	0.983	0.984	0.983	0.3	0.3	0.3	0.3	Non	Non	Non
Non	Cla000597	Unknown	0.969	0.97	0.969	1	1	1	1	Non	Non	Non
Non	Cla000598	Unknown	0.969	0.97	0.969	1	1	1	1	Non	Non	Non
Non	Cla000599	Unknown	0.969	0.97	0.969	1	1	1	1	Non	Non	Non
Non	Cla000600	Ty3-gypsy	0.969	0.97	0.969	1	1	1	1	Non	Non	Non
Non	Cla000601	Unknown	0.969	0.97	0.969	1	1	1	1	Non	Non	Non
Non	Cla000602	Unknown	0.969	0.97	0.969	1	1	1	1	Non	Non	Non
Non	Cla000603	Unknown	0.969	0.97	0.969	1	1	1	1	Non	Non	Non
Non	Cla000604	Dof	0.797	0.812	0.797	0.4	0.7	0.2	0.7	Non	Non	Non
Non	Cla000605	Unknown	0.969	0.97	0.969	1	1	1	1	Non	Non	Non
Non	Cla000606	Rhamnogalacturonate	0.39	0.806	0.567	1.2	3.1	0.8	0.5	Non	Non	Non
Non	Cla000607	Unknown	0.99	0.376	0.99	0.1	0.1	1	0.1	Non	Non	Non
Non	Cla000608	Unknown	0.969	0.97	0.969	1	1	1	1	Non	Non	Non
Non	Cla000609	Mitochondrial	0.772	0.657	0.706	1.7	2.4	2.5	2.6	Non	Non	Non
Non	Cla000611	Unknown	0.407	0.376	0.407	0.1	1	1	1	Non	Non	Non
Non	Cla000612	Glucose-6-phosphate	0.475	0.424	0.104	14.4	19.5	18.1	25.8	Non	Non	Non
Non	Cla000613	Unknown	0.969	0.97	0.969	1	1	1	1	Non	Non	Non
Non	Cla000614	SEC1	0.956	0.622	0.118	9.6	9.9	11.3	18.7	Non	Non	Non
Non	Cla000615	Phosphoglycerate	0.876	0.639	0.596	1	1.3	1.7	2	Non	Non	Non
Non	Cla000616	Unknown	0.969	0.97	0.969	1	1	1	1	Non	Non	Non
Non	Cla000617	Ser/Thr-rich	0.878	0.154	0.503	3.2	3.8	7.6	5.4	Non	Non	Non
Non	Cla000618	Unknown	0.969	0.97	0.969	1	1	1	1	Non	Non	Non
Non	Cla000619	Unknown	0.903	0.987	0.813	0.2	0.3	0.2	0.4	Non	Non	Non
Non	Cla000620	Ty3-gypsy	0.969	0.97	0.969	1	1	1	1	Non	Non	Non
Non	Cla000621	Unknown	0.375	0.97	0.375	1	0.1	1	0.1	Non	Non	Non
Non	Cla000622	Kinesin	0.886	0.981	0.937	0.4	0.3	0.4	0.5	Non	Non	Non
Non	Cla000623	Unknown	0.926	0.909	0.969	1	1.2	0.8	1	Non	Non	Non
Non	Cla000624	FtsH	0.916	0.79	0.418	2.1	2	1.5	0.8	Non	Non	Non
Non	Cla000625	FtsH	0.923	0.978	0.694	6	6.7	5.6	5	Non	Non	Non
Non	Cla000626	FtsH	0.626	0.631	0.922	1.8	3	2.7	2.1	Non	Non	Non
Non	Cla000627	Acyl-	0.815	0.41	0.978	3	3.8	1.2	3.1	Non	Non	Non
Non	Cla000628	TO23-3	0.403	0.784	0.253	1.5	0.4	1	0.1	Non	Non	Non
Non	Cla000629	Chromatin	0.769	0.934	0.925	5	6.3	5	5.6	Non	Non	Non
Non	Cla000630	Unknown	0.969	0.97	0.969	1	1	1	1	Non	Non	Non
Non	Cla000631	Unknown	0.375	0.97	0.375	1	0.1	1	0.1	Non	Non	Non
Non	Cla000632	One	0.941	0.282	0.082	4.6	5.1	8.1	12.2	Non	Non	Non
Non	Cla000634	Unknown	0.969	0.97	0.969	1	1	1	1	Non	Non	Non
Non	Cla000635	Unknown	0.969	0.97	0.969	1	1	1	1	Non	Non	Non
Non	Cla000636	Unknown	0.969	0.97	0.375	1	1	1	0.1	Non	Non	Non
Non	Cla000637	Unknown	0.969	0.97	0.969	1	1	1	1	Non	Non	Non
Non	Cla000638	Unknown	0.969	0.97	0.969	1	1	1	1	Non	Non	Non
Non	Cla000639	Unknown	0.843	0.448	0.843	0.2	0.1	1	0.1	Non	Non	Non
Non	Cla000640	Unknown	0.969	0.97	0.969	1	1	1	1	Non	Non	Non
Non	Cla000641	Unknown	0.375	0.406	0.375	1	0.1	0.1	0.1	Non	Non	Non
Non	Cla000642	Unknown	0.969	0.97	0.969	1	1	1	1	Non	Non	Non
Non	Cla000643	Unknown	0.969	0.97	0.969	1	1	1	1	Non	Non	Non
Non	Cla000644	Unknown	0.969	0.97	0.969	1	1	1	1	Non	Non	Non
Non	Cla000645	Unknown	0.969	0.97	0.969	1	1	1	1	Non	Non	Non
Non	Cla000646	Unknown	0.375	0.97	0.375	1	0.1	1	0.1	Non	Non	Non
Non	Cla000647	Unknown	0.804	0.736	0.804	0.5	0.3	0.2	0.3	Non	Non	Non
Non	Cla000648	Unknown	0.969	0.97	0.969	1	1	1	1	Non	Non	Non
Non	Cla000649	Unknown	0.969	0.97	0.969	1	1	1	1	Non	Non	Non
Non	Cla000650	Unknown	0.969	0.97	0.969	1	1	1	1	Non	Non	Non
Non	Cla000651	Unknown	0.375	0.406	0.969	1	0.1	0.1	1	Non	Non	Non
Non	Cla000652	Unknown	0.969	0.97	0.969	1	1	1	1	Non	Non	Non
Non	Cla000654	Gag/pol	0.969	0.97	0.969	1	1	1	1	Non	Non	Non
Non	Cla000655	Cytochrome	0.826	0.558	0.117	46.9	47.4	39.2	35	Non	Non	Non
Non	Cla000656	Unknown	0.969	0.97	0.969	1	1	1	1	Non	Non	Non
Non	Cla000657	Unknown	0.969	0.97	0.969	1	1	1	1	Non	Non	Non
Non	Cla000658	Unknown	0.969	0.97	0.969	1	1	1	1	Non	Non	Non
Non	Cla000659	Unknown	0.969	0.97	0.969	1	1	1	1	Non	Non	Non
Non	Cla000660	Unknown	0.969	0.97	0.969	1	1	1	1	Non	Non	Non
Non	Cla000661	Unknown	0.407	0.376	0.407	0.1	1	1	1	Non	Non	Non
Non	Cla000662	F-box	0.737	0.865	0.61	1.1	0.7	1.3	2.1	Non	Non	Non
Non	Cla000663	Unknown	0.84	0.247	0.101	6.9	8.1	3	2.2	Non	Non	Non
Non	Cla000665	Unknown	0.969	0.97	0.375	1	1	1	0.1	Non	Non	Non
Non	Cla000666	Unknown	0.969	0.97	0.969	1	1	1	1	Non	Non	Non
Sig4	Cla000667	Violaxanthin	0.647	0.647	0.036	22.4	27	18.4	11.2	Non	Non	Sig
Non	Cla000668	Unknown	0.407	0.991	0.407	0.1	1	0.1	1	Non	Non	Non
Non	Cla000669	Unknown	0.831	0.975	0.753	0.7	0.5	0.7	0.4	Non	Non	Non
Non	Cla000670	Unknown	0.99	0.844	0.765	0.1	0.1	0.2	0.3	Non	Non	Non
Non	Cla000671	Unknown	0.969	0.97	0.969	1	1	1	1	Non	Non	Non
Non	Cla000672	Unknown	0.969	0.97	0.969	1	1	1	1	Non	Non	Non
Non	Cla000673	Unknown	0.969	0.97	0.969	1	1	1	1	Non	Non	Non
Non	Cla000674	Unknown	0.969	0.97	0.969	1	1	1	1	Non	Non	Non
Non	Cla000675	Unknown	0.969	0.483	0.375	1	1	0.2	0.1	Non	Non	Non
Non	Cla000676	Cold-shock	0.823	0.471	0.424	1.6	1.3	0.5	0.5	Non	Non	Non
Non	Cla000677	Unknown	0.969	0.97	0.969	1	1	1	1	Non	Non	Non
Non	Cla000678	Unknown	0.969	0.97	0.969	1	1	1	1	Non	Non	Non
Non	Cla000679	Gag/pol	0.969	0.97	0.969	1	1	1	1	Non	Non	Non
Non	Cla000680	Unknown	0.969	0.97	0.375	1	1	1	0.1	Non	Non	Non
Non	Cla000681	Auxin	0.574	0.00945	0.011	7.7	6	0.2	0.6	Non	Non	Non
Non	Cla000682	Unknown	0.969	0.97	0.969	1	1	1	1	Non	Non	Non
Non	Cla000684	Uncharacterized	0.888	0.994	0.6	3.5	4.1	3.3	5.3	Non	Non	Non
Non	Cla000686	Unknown	0.919	0.338	0.331	0.9	1.1	2.6	2.9	Non	Non	Non
Sig4	Cla000687	Calmodulin-binding	0.483	0.081	0.036	11.8	16.3	20.9	25.7	Non	Non	Sig
Non	Cla000688	Calmodulin-binding	0.842	0.416	0.273	2.3	2.9	4.2	5.6	Non	Non	Non
Non	Cla000689	Os02g0508100	0.752	0.796	0.905	0.7	0.4	0.4	0.6	Non	Non	Non
Non	Cla000690	Unknown	0.984	0.331	0.982	10.4	10.9	14.6	11.1	Non	Non	Non
Non	Cla000691	Transcription	0.737	0.531	0.416	0.2	0.5	0.8	1.2	Non	Non	Non
Non	Cla000692	Unknown	0.969	0.97	0.969	1	1	1	1	Non	Non	Non
Non	Cla000693	Unknown	0.867	0.274	0.44	0.1	0.2	1.4	0.9	Non	Non	Non
Non	Cla000694	Fasciclin-like	0.375	0.97	0.969	1	0.1	1	1	Non	Non	Non
Non	Cla000695	Unknown	0.969	0.97	0.969	1	1	1	1	Non	Non	Non
Non	Cla000696	Ty3-gypsy	0.969	0.97	0.969	1	1	1	1	Non	Non	Non
Non	Cla000697	Os03g0102400	0.692	0.65	0.257	7.4	9.5	8.8	13.1	Non	Non	Non
Non	Cla000698	Unknown	0.969	0.97	0.969	1	1	1	1	Non	Non	Non
Non	Cla000699	Unknown	0.969	0.97	0.969	1	1	1	1	Non	Non	Non
Non	Cla000700	Unknown	0.375	0.406	0.375	1	0.1	0.1	0.1	Non	Non	Non
Sig4	Cla000701	AP2-like	0.884	0.536	0.033	24.7	27.2	27.8	44.3	Non	Non	Sig
Non	Cla000702	OTU	0.825	0.378	0.502	2.6	3.3	4.8	4.6	Non	Non	Non
Non	Cla000703	BHLH	0.686	0.991	0.867	0.1	0.4	0.1	0.2	Non	Non	Non
Sig3	Cla000704	Receptor-like	0.25	0.017	0.866	25.2	18.8	10.1	25.4	Non	Sig	Non
Non	Cla000705	Uncharacterized	0.744	0.327	0.934	10.4	9.5	6	10.6	Non	Non	Non
Non	Cla000706	Os04g0689500	0.813	0.448	0.843	0.2	0.4	1	0.1	Non	Non	Non
Non	Cla000707	Serine/threonine-protein	0.923	0.519	0.204	0.3	0.4	1	2.5	Non	Non	Non
Non	Cla000708	Lipase	0.892	0.565	0.535	0.6	0.8	0.1	0.1	Non	Non	Non
Non	Cla000710	Remorin	0.838	0.543	0.954	2.2	1.9	3.5	2.2	Non	Non	Non
Non	Cla000711	Unknown	0.875	0.634	0.627	1.6	2	0.8	0.9	Non	Non	Non
Non	Cla000712	Pentatricopeptide	0.436	0.051	0.015	0.6	1.9	5.1	8	Non	Non	Non
Non	Cla000714	Ethylene	0.969	0.406	0.375	1	1	0.1	0.1	Non	Non	Non
Non	Cla000715	Os03g0395600	0.041	0.771	0.00614	117.1	158.7	115.4	171.6	Non	Non	Non
Non	Cla000716	ATP-dependent	0.8	0.085	0.672	4.6	5.7	11	6.3	Non	Non	Non
Non	Cla000717	Unknown	0.986	0.448	0.484	0.2	0.2	1	1	Non	Non	Non
Non	Cla000718	Os10g0382300	0.623	0.345	0.114	22.8	27.7	28.2	36.6	Non	Non	Non
Non	Cla000719	Unknown	0.447	0.559	0.447	1	0.2	0.3	0.2	Non	Non	Non
Non	Cla000720	Pentatricopeptide	0.846	0.475	0.775	4.6	5.5	6.7	4	Non	Non	Non
Non	Cla000721	Unknown	0.407	0.844	0.765	0.1	1	0.2	0.3	Non	Non	Non
Non	Cla000722	Unknown	0.969	0.97	0.969	1	1	1	1	Non	Non	Non
Non	Cla000723	Unknown	0.99	0.376	0.99	0.1	0.1	1	0.1	Non	Non	Non
Non	Cla000724	Unknown	0.969	0.97	0.969	1	1	1	1	Non	Non	Non
Non	Cla000725	Unknown	0.969	0.97	0.969	1	1	1	1	Non	Non	Non
Non	Cla000726	Unknown	0.969	0.97	0.969	1	1	1	1	Non	Non	Non
Non	Cla000727	Unknown	0.969	0.97	0.969	1	1	1	1	Non	Non	Non
Non	Cla000728	Unknown	0.969	0.97	0.969	1	1	1	1	Non	Non	Non
Non	Cla000729	Unknown	0.969	0.97	0.969	1	1	1	1	Non	Non	Non
Non	Cla000730	Unknown	0.903	0.873	0.986	0.2	0.3	0.3	0.2	Non	Non	Non
Non	Cla000731	UDP-N-acetylglucosamine	0.855	0.959	0.854	1.9	2.4	1.9	2.4	Non	Non	Non
Non	Cla000732	Unknown	0.99	0.376	0.99	0.1	0.1	1	0.1	Non	Non	Non
Non	Cla000733	Unknown	0.99	0.991	0.99	0.1	0.1	0.1	0.1	Non	Non	Non
Non	Cla000734	Cytochrome	0.84	0.349	0.102	26.2	26.2	31.8	41.5	Non	Non	Non
Non	Cla000735	Exostosin	0.898	0.702	0.942	1.3	1.6	1.9	1.5	Non	Non	Non
Non	Cla000736	Unknown	0.969	0.97	0.969	1	1	1	1	Non	Non	Non
Non	Cla000737	Receptor-like	0.591	0.642	0.282	2	3.4	1.1	0.4	Non	Non	Non
Non	Cla000738	Gag	0.375	0.406	0.375	1	0.1	0.1	0.1	Non	Non	Non
Non	Cla000739	Unknown	0.99	0.991	0.99	0.1	0.1	0.1	0.1	Non	Non	Non
Non	Cla000740	Unknown	0.969	0.97	0.969	1	1	1	1	Non	Non	Non
Non	Cla000741	Unknown	0.969	0.97	0.969	1	1	1	1	Non	Non	Non
Non	Cla000742	Ras-related	0.969	0.406	0.447	1	1	0.1	0.2	Non	Non	Non
Non	Cla000743	Polychome	0.563	0.522	0.563	0.9	0.3	0.2	0.3	Non	Non	Non
Non	Cla000744	Cytochrome	0.969	0.97	0.969	1	1	1	1	Non	Non	Non
Sig4	Cla000745	Polygalacturonase-inhibitor	0.96	0.938	0.02	4.4	4.5	4.4	15.2	Non	Non	Sig
Non	Cla000746	Beta-galactosidase	0.969	0.97	0.969	1	1	1	1	Non	Non	Non
Non	Cla000747	Unknown	0.969	0.97	0.969	1	1	1	1	Non	Non	Non
Non	Cla000748	Unknown	0.99	0.991	0.99	0.1	0.1	0.1	0.1	Non	Non	Non
Non	Cla000749	Unknown	0.969	0.97	0.969	1	1	1	1	Non	Non	Non
Non	Cla000750	Unknown	0.969	0.97	0.969	1	1	1	1	Non	Non	Non
Non	Cla000751	Unknown	0.969	0.97	0.969	1	1	1	1	Non	Non	Non
Non	Cla000752	Pentatricopeptide	0.969	0.97	0.969	1	1	1	1	Non	Non	Non
Non	Cla000754	Ras-related	0.953	0.904	0.667	2.7	3	2.3	4	Non	Non	Non
Non	Cla000755	Monooxygenase	0.969	0.97	0.969	1	1	1	1	Non	Non	Non
Non	Cla000756	Unknown	0.808	0.854	0.908	0.8	1.2	1	0.7	Non	Non	Non
Non	Cla000757	Unknown	0.98	0.812	0.887	0.4	0.4	0.2	0.3	Non	Non	Non
Non	Cla000758	Unknown	0.969	0.97	0.969	1	1	1	1	Non	Non	Non
Sig3	Cla000759	Unknown	0.00752	0.027	0.886	83.2	55.6	53.7	86	Non	Sig	Non
Non	Cla000760	Dirigent	0.682	0.565	0.535	0.6	1.2	0.1	0.1	Non	Non	Non
Non	Cla000761	2-octaprenyl-3-methyl-6-methoxy-1	0.846	0.122	0.305	10.9	10.6	18.5	17.1	Non	Non	Non
Non	Cla000762	Calcium	0.689	0.612	0.512	4	5.5	5.3	6.4	Non	Non	Non
Non	Cla000763	ATP	0.986	0.866	0.813	0.2	0.2	0.1	0.4	Non	Non	Non
Non	Cla000764	Unknown	0.7	0.637	0.643	1.3	0.8	0.6	0.7	Non	Non	Non
Non	Cla000765	Respiratory	0.407	0.535	0.407	0.1	1	0.6	1	Non	Non	Non
Non	Cla000766	Unknown	0.969	0.97	0.969	1	1	1	1	Non	Non	Non
Non	Cla000767	Myb-related	0.375	0.97	0.969	1	0.1	1	1	Non	Non	Non
Non	Cla000768	Unknown	0.375	0.97	0.375	1	0.1	1	0.1	Non	Non	Non
Non	Cla000769	Unknown	0.969	0.97	0.969	1	1	1	1	Non	Non	Non
Non	Cla000770	Unknown	0.969	0.97	0.969	1	1	1	1	Non	Non	Non
Non	Cla000771	Frataxin-like	0.881	0.637	0.483	4.1	3.9	5.3	6.7	Non	Non	Non
Non	Cla000772	Unknown	0.969	0.97	0.969	1	1	1	1	Non	Non	Non
Non	Cla000773	Unknown	0.375	0.97	0.969	1	0.1	1	1	Non	Non	Non
Non	Cla000774	Unknown	0.969	0.97	0.969	1	1	1	1	Non	Non	Non
Non	Cla000775	Unknown	0.969	0.97	0.969	1	1	1	1	Non	Non	Non
Non	Cla000776	Unknown	0.969	0.97	0.969	1	1	1	1	Non	Non	Non
Non	Cla000777	Threonine	0.962	0.631	0.133	1.8	2	2.7	6.3	Non	Non	Non
Non	Cla000779	Unknown	0.969	0.97	0.969	1	1	1	1	Non	Non	Non
Non	Cla000780	Unknown	0.969	0.97	0.969	1	1	1	1	Non	Non	Non
Non	Cla000781	Cell	0.929	0.189	0.266	8.3	8.4	13.9	14.2	Non	Non	Non
Non	Cla000782	60S	0.288	0.925	0.704	9.9	6.1	9.8	12.3	Non	Non	Non
Non	Cla000783	Pre-mRNA-splicing	0.97	0.151	0.272	15.4	16.5	23.3	23.3	Non	Non	Non
Non	Cla000784	Unknown	0.969	0.97	0.969	1	1	1	1	Non	Non	Non
Non	Cla000785	Unknown	0.969	0.97	0.969	1	1	1	1	Non	Non	Non
Non	Cla000786	Integral	0.934	0.491	0.65	9.2	10.1	11.8	7.8	Non	Non	Non
Non	Cla000787	Unknown	0.969	0.97	0.969	1	1	1	1	Non	Non	Non
Non	Cla000788	Os04g0347800	0.089	0.508	0.132	8.5	18	10.9	3.6	Non	Non	Non
Non	Cla000789	Tic22-like	0.671	0.117	0.379	2	3.1	6.3	4.4	Non	Non	Non
Non	Cla000790	Unknown	0.969	0.97	0.969	1	1	1	1	Non	Non	Non
Non	Cla000791	Unknown	0.969	0.97	0.969	1	1	1	1	Non	Non	Non
Non	Cla000792	Ribosomal	0.949	0.749	0.341	10.5	10.8	8.6	7	Non	Non	Non
Non	Cla000793	Unknown	0.447	0.406	0.447	1	0.2	0.1	0.2	Non	Non	Non
Non	Cla000794	Expressed	0.374	0.742	0.235	1.6	0.4	1	0.1	Non	Non	Non
Non	Cla000795	Unknown	0.768	0.701	0.716	0.8	0.5	1.3	1.4	Non	Non	Non
Sig3.4	Cla000796	BURP	0.467	3.55e-08	5.92e-10	61	56.4	12	10.6	Non	Sig	Sig
Sig4	Cla000797	OB-fold	0.774	0.361	0.015	12	14.2	16.1	28.6	Non	Non	Sig
Sig3.4	Cla000800	Os09g0327550	0.727	0.045	0.037	4.4	5.8	12.1	13.8	Non	Sig	Sig
Non	Cla000801	F8A5.1	0.879	0.769	0.442	0.5	0.7	0.8	1.7	Non	Non	Non
Sig3.4	Cla000802	Polygalacturonase	0.631	3.95e-09	2.99e-12	52.1	50.1	5.8	2.2	Non	Sig	Sig
Non	Cla000803	Pentatricopeptide	0.856	0.975	0.61	1.1	0.9	1	0.5	Non	Non	Non
Non	Cla000804	UPF0712	0.684	0.296	0.626	1.8	2.8	4.2	3	Non	Non	Non
Non	Cla000805	Baculoviral	0.975	0.685	0.588	9.7	10.4	11	12.9	Non	Non	Non
Non	Cla000806	Plant-specific	0.832	0.11	0.028	6.3	5.9	1.6	0.7	Non	Non	Non
Non	Cla000807	CRABS	0.99	0.376	0.407	0.1	0.1	1	1	Non	Non	Non
Sig3.4	Cla000808	MRNA	0.946	0.012	0.034	3.6	4	13.5	12.6	Non	Sig	Sig
Sig4	Cla000809	Succinyl-CoA	0.112	0.614	0.047	26.8	41.9	29.1	15.1	Non	Non	Sig
Sig4	Cla000810	Receptor-like	0.559	0.102	0.00153	15	12.7	6.8	2.3	Non	Non	Sig
Non	Cla000811	Trichome	0.876	0.834	0.754	2.1	1.9	1.6	1.6	Non	Non	Non
Non	Cla000812	Knotted-like	0.969	0.97	0.969	1	1	1	1	Non	Non	Non
Non	Cla000813	Homeobox	0.407	0.376	0.407	0.1	1	1	1	Non	Non	Non
Non	Cla000814	Ubiquinone/menaquinone	0.897	0.949	0.703	9	10.1	8.8	7.9	Non	Non	Non
Non	Cla000816	Receptor-like	0.514	0.862	0.69	12.9	10.4	11.4	11.6	Non	Non	Non
Non	Cla000817	Plant	0.99	0.844	0.99	0.1	0.1	0.2	0.1	Non	Non	Non
Non	Cla000818	Carboxyl-terminal	0.619	0.321	0.245	2	1.2	0.4	0.3	Non	Non	Non
Non	Cla000819	Alliinase	0.942	0.098	0.855	5.9	6.5	12.5	5.6	Non	Non	Non
Non	Cla000820	Condensin-2	0.826	0.836	0.369	1.7	1.4	2	4	Non	Non	Non
Non	Cla000821	Unknown	0.969	0.97	0.969	1	1	1	1	Non	Non	Non
Non	Cla000822	Unknown	0.407	0.991	0.407	0.1	1	0.1	1	Non	Non	Non
Non	Cla000823	Unknown	0.969	0.97	0.969	1	1	1	1	Non	Non	Non
Non	Cla000824	Endosomal	0.804	0.736	0.978	0.5	0.3	0.2	0.5	Non	Non	Non
Non	Cla000825	Unknown	0.969	0.97	0.969	1	1	1	1	Non	Non	Non
Non	Cla000826	Unknown	0.969	0.97	0.969	1	1	1	1	Non	Non	Non
Non	Cla000828	C2	0.623	0.821	0.301	1.2	2.2	1.5	3.6	Non	Non	Non
Non	Cla000829	60S	0.193	0.758	0.53	17.6	11.4	18.5	22.7	Non	Non	Non
Non	Cla000830	Double-strand-break	0.486	0.439	0.486	0.9	0.2	0.1	0.2	Non	Non	Non
Non	Cla000831	Polygalacturonase-inhibitor	0.413	0.231	0.203	1.8	0.6	0.1	0.1	Non	Non	Non
Non	Cla000832	Helicase	0.882	0.303	0.198	4.2	4.9	7.4	9.3	Non	Non	Non
Non	Cla000833	Retrotransposon	0.969	0.97	0.375	1	1	1	0.1	Non	Non	Non
Non	Cla000834	Unknown	0.863	0.896	0.937	0.4	0.6	0.5	0.5	Non	Non	Non
Sig4	Cla000835	Pentatricopeptide	0.822	0.32	0.024	28.1	31.5	34.3	14.5	Non	Non	Sig
Non	Cla000836	Unknown	0.99	0.844	0.99	0.1	0.1	0.2	0.1	Non	Non	Non
Non	Cla000837	Unknown	0.969	0.97	0.969	1	1	1	1	Non	Non	Non
Non	Cla000838	Uncharacterized	0.794	0.303	0.155	8.1	9.7	12.2	15.7	Non	Non	Non
Non	Cla000839	N-6	0.765	0.991	0.377	0.1	0.3	0.1	1.1	Non	Non	Non
Non	Cla000841	ATP	0.969	0.298	0.141	3.4	3.7	6.4	8.9	Non	Non	Non
Non	Cla000842	Unknown	0.969	0.97	0.969	1	1	1	1	Non	Non	Non
Non	Cla000843	Cystinosin	0.616	0.757	0.97	0.9	1.8	1.3	0.9	Non	Non	Non
Non	Cla000844	Unknown	0.969	0.97	0.969	1	1	1	1	Non	Non	Non
Non	Cla000845	Unknown	0.867	0.991	0.99	0.1	0.2	0.1	0.1	Non	Non	Non
Non	Cla000846	Major	0.969	0.97	0.969	1	1	1	1	Non	Non	Non
Non	Cla000847	Unknown	0.969	0.97	0.969	1	1	1	1	Non	Non	Non
Non	Cla000849	Unknown	0.969	0.97	0.969	1	1	1	1	Non	Non	Non
Non	Cla000850	Protein	0.574	0.045	0.678	63.8	61	84.3	72.4	Non	Non	Non
Non	Cla000851	Cysteinyl-tRNA	0.921	0.355	0.159	12.3	12.5	16.5	21.4	Non	Non	Non
Non	Cla000852	CACTA	0.842	0.805	0.923	0.3	0.5	0.5	0.4	Non	Non	Non
Non	Cla000853	Receptor-like	0.649	0.764	0.728	5	6.9	5.7	4.2	Non	Non	Non
Non	Cla000854	tRNA	0.863	0.759	0.643	1.3	1.1	0.8	0.7	Non	Non	Non
Sig4	Cla000855	Ethylene-responsive	0.068	0.066	0.00982	14.8	6.9	5.9	4.1	Non	Non	Sig
Non	Cla000856	Unknown	0.375	0.406	0.589	1	0.1	0.1	0.4	Non	Non	Non
Non	Cla000857	Unknown	0.975	0.434	0.46	3.2	3.3	1.4	1.7	Non	Non	Non
Sig3	Cla000858	Chaperone	0.334	1.14e-14	0.000402	178.1	169.8	340.1	124.9	Non	Sig	Non
Non	Cla000860	Unknown	0.969	0.97	0.969	1	1	1	1	Non	Non	Non
Non	Cla000861	RNA-binding	0.969	0.97	0.969	1	1	1	1	Non	Non	Non
Non	Cla000862	Unknown	0.969	0.97	0.969	1	1	1	1	Non	Non	Non
Non	Cla000863	Unknown	0.969	0.97	0.969	1	1	1	1	Non	Non	Non
Non	Cla000864	Unknown	0.969	0.97	0.969	1	1	1	1	Non	Non	Non
Non	Cla000865	Unknown	0.969	0.97	0.969	1	1	1	1	Non	Non	Non
Non	Cla000866	Unknown	0.969	0.97	0.969	1	1	1	1	Non	Non	Non
Non	Cla000867	Unknown	0.969	0.97	0.969	1	1	1	1	Non	Non	Non
Non	Cla000868	Unknown	0.969	0.97	0.969	1	1	1	1	Non	Non	Non
Non	Cla000869	Unknown	0.969	0.97	0.969	1	1	1	1	Non	Non	Non
Non	Cla000870	Unknown	0.969	0.97	0.969	1	1	1	1	Non	Non	Non
Non	Cla000871	1-deoxy-D-xylulose	0.364	0.97	0.534	1	2.9	1	2.2	Non	Non	Non
Non	Cla000872	1-deoxy-D-xylulose	0.969	0.97	0.969	1	1	1	1	Non	Non	Non
Non	Cla000873	Cation/H(+)	0.375	0.97	0.969	1	0.1	1	1	Non	Non	Non
Non	Cla000875	Unknown	0.969	0.97	0.969	1	1	1	1	Non	Non	Non
Non	Cla000877	CRS2-associated	0.689	0.305	0.333	1.5	2.4	3.7	3.9	Non	Non	Non
Non	Cla000878	Unknown	0.997	0.881	0.263	5	5.3	4.3	9.7	Non	Non	Non
Non	Cla000879	Cytochrome	0.969	0.97	0.969	1	1	1	1	Non	Non	Non
Non	Cla000880	Unknown	0.969	0.97	0.969	1	1	1	1	Non	Non	Non
Non	Cla000881	Unknown	0.969	0.406	0.447	1	1	0.1	0.2	Non	Non	Non
Non	Cla000882	Cytochrome	0.969	0.406	0.969	1	1	0.1	1	Non	Non	Non
Non	Cla000883	mRNA	0.407	0.376	0.867	0.1	1	1	0.2	Non	Non	Non
Non	Cla000885	DS	0.867	0.445	0.99	0.1	0.2	0.8	0.1	Non	Non	Non
Non	Cla000886	Early	0.986	0.987	0.843	0.2	0.2	0.2	0.1	Non	Non	Non
Non	Cla000887	ATP-dependent	0.318	0.962	0.14	56.1	70.9	53.7	44.1	Non	Non	Non
Non	Cla000888	Unknown	0.765	0.991	0.765	0.1	0.3	0.1	0.3	Non	Non	Non
Non	Cla000889	Nucleoporin	0.621	0.289	0.123	3.5	5.2	6.6	9.4	Non	Non	Non
Non	Cla000890	Unknown	0.566	0.805	0.779	2.3	3.9	1.7	3.1	Non	Non	Non
Non	Cla000891	GATA	0.484	0.616	0.487	0.7	1.9	0.2	0.1	Non	Non	Non
Non	Cla000892	Protein	0.801	0.569	0.407	3.3	4.2	4.7	6.1	Non	Non	Non
Non	Cla000893	Class	0.577	0.495	0.317	7.9	6.2	5.1	4.7	Non	Non	Non
Non	Cla000894	Unknown	0.765	0.738	0.563	6.2	7.7	4.8	4.6	Non	Non	Non
Non	Cla000895	Avr9/Cf-9	0.986	0.873	0.416	0.2	0.2	0.3	1.2	Non	Non	Non
Sig4	Cla000896	Kinase	0.518	0.094	0.048	9.9	13.7	18	21.9	Non	Non	Sig
Non	Cla000897	Sequence-specific	0.582	0.382	0.49	0.9	1.9	2.4	2.2	Non	Non	Non
Non	Cla000898	NAD-dependent	0.752	0.796	0.962	0.7	0.4	0.4	0.8	Non	Non	Non
Non	Cla000899	Myb	0.976	0.983	0.342	5.2	5.6	5	9.2	Non	Non	Non
Non	Cla000900	Protein	0.766	0.331	0.198	1.2	1.8	3.1	4.4	Non	Non	Non
Non	Cla000901	Histidine	0.826	0.538	0.369	1.7	1.4	2.9	4	Non	Non	Non
Non	Cla000902	RNA	0.867	0.544	0.921	9.7	9.5	6.8	9.8	Non	Non	Non
Non	Cla000903	MMS19	0.661	0.956	0.886	5.3	7.2	5.2	6.1	Non	Non	Non
Non	Cla000904	MMS19	0.962	0.695	0.848	1.8	2	2.5	2.3	Non	Non	Non
Non	Cla000905	Taurine	0.542	0.07	0.682	8.9	12.3	17.5	11.3	Non	Non	Non
Non	Cla000906	Poly(A)	0.599	0.054	0.212	35.4	42.2	51	49.2	Non	Non	Non
Non	Cla000907	Calmodulin-binding	0.926	0.406	0.969	1	1.2	0.1	1	Non	Non	Non
Non	Cla000908	Profilin	0.923	0.902	0.739	0.3	0.4	0.2	0.1	Non	Non	Non
Non	Cla000909	Unknown	0.833	0.629	0.638	0.6	0.9	1.2	1.3	Non	Non	Non
Sig3	Cla000911	GDSL	0.729	0.028	0.199	7.3	6.4	17.6	3.4	Non	Sig	Non
Non	Cla000912	Receptor-like	0.969	0.406	0.969	1	1	0.1	1	Non	Non	Non
Non	Cla000913	Receptor-like	0.863	0.685	0.635	0.4	0.6	0.1	1	Non	Non	Non
Non	Cla000914	Receptor-like	0.435	0.296	0.169	22	29	14.7	33.8	Non	Non	Non
Non	Cla000915	Nuclear	0.491	0.134	0.814	3	5.2	7.6	3.8	Non	Non	Non
Non	Cla000916	Unknown	0.969	0.406	0.969	1	1	0.1	1	Non	Non	Non
Non	Cla000917	Unknown	0.969	0.406	0.969	1	1	0.1	1	Non	Non	Non
Non	Cla000918	Gag/pol	0.99	0.376	0.99	0.1	0.1	1	0.1	Non	Non	Non
Non	Cla000919	Unknown	0.375	0.97	0.969	1	0.1	1	1	Non	Non	Non
Non	Cla000920	5-AMP-activated	0.83	0.325	0.65	4.1	5	7.1	5.8	Non	Non	Non
Sig4	Cla000921	Unknown	0.733	0.155	2.28e-07	27.3	26.3	16.7	0.7	Non	Non	Sig
Non	Cla000922	Retrotransposon	0.969	0.97	0.969	1	1	1	1	Non	Non	Non
Non	Cla000923	Unknown	0.969	0.97	0.969	1	1	1	1	Non	Non	Non
Non	Cla000924	Unknown	0.842	0.984	0.772	0.3	0.5	0.3	0.6	Non	Non	Non
Non	Cla000925	Unknown	0.99	0.991	0.407	0.1	0.1	0.1	1	Non	Non	Non
Non	Cla000926	Unknown	0.872	0.764	0.739	0.3	0.2	0.1	0.1	Non	Non	Non
Non	Cla000927	Unknown	0.621	0.739	0.686	0.1	0.5	0.3	0.4	Non	Non	Non
Non	Cla000928	Unknown	0.969	0.97	0.969	1	1	1	1	Non	Non	Non
Non	Cla000929	AP2-like	0.969	0.97	0.969	1	1	1	1	Non	Non	Non
Non	Cla000930	Unknown	0.969	0.97	0.969	1	1	1	1	Non	Non	Non
Non	Cla000931	Unknown	0.969	0.97	0.969	1	1	1	1	Non	Non	Non
Non	Cla000932	Unknown	0.969	0.97	0.969	1	1	1	1	Non	Non	Non
Sig3	Cla000933	DNA	0.79	0.037	0.403	4.3	5.4	12.4	7.5	Non	Sig	Non
Non	Cla000934	Unknown	0.969	0.97	0.969	1	1	1	1	Non	Non	Non
Non	Cla000935	Unknown	0.969	0.97	0.969	1	1	1	1	Non	Non	Non
Non	Cla000936	Unknown	0.969	0.97	0.969	1	1	1	1	Non	Non	Non
Non	Cla000937	Unknown	0.969	0.97	0.969	1	1	1	1	Non	Non	Non
Non	Cla000938	Unknown	0.969	0.97	0.969	1	1	1	1	Non	Non	Non
Non	Cla000939	Unknown	0.969	0.97	0.969	1	1	1	1	Non	Non	Non
Non	Cla000940	Unknown	0.969	0.97	0.969	1	1	1	1	Non	Non	Non
Non	Cla000941	Unknown	0.969	0.97	0.969	1	1	1	1	Non	Non	Non
Non	Cla000942	Unknown	0.969	0.97	0.969	1	1	1	1	Non	Non	Non
Non	Cla000943	Unknown	0.969	0.97	0.969	1	1	1	1	Non	Non	Non
Non	Cla000944	Unknown	0.969	0.97	0.969	1	1	1	1	Non	Non	Non
Non	Cla000946	Unknown	0.969	0.97	0.969	1	1	1	1	Non	Non	Non
Non	Cla000947	Unknown	0.969	0.97	0.969	1	1	1	1	Non	Non	Non
Non	Cla000948	Serine/threonine-protein	0.968	0.73	0.666	6	6.2	6.9	8	Non	Non	Non
Non	Cla000949	Serine/threonine-protein	0.846	0.158	0.173	10.9	10.6	17.7	19.2	Non	Non	Non
Non	Cla000950	Unknown	0.969	0.97	0.375	1	1	1	0.1	Non	Non	Non
Non	Cla000951	Protein	0.833	0.586	0.891	0.6	0.9	1.3	0.8	Non	Non	Non
Non	Cla000952	Unknown	0.99	0.844	0.867	0.1	0.1	0.2	0.2	Non	Non	Non
Non	Cla000953	Unknown	0.867	0.2	0.1	9.7	9.5	4.5	4	Non	Non	Non
Non	Cla000954	Nicalin	0.775	0.846	0.907	8.6	7.9	7.4	9.6	Non	Non	Non
Non	Cla000955	Unknown	0.867	0.739	0.565	0.1	0.2	0.3	0.6	Non	Non	Non
Non	Cla000956	Unknown	0.969	0.97	0.969	1	1	1	1	Non	Non	Non
Non	Cla000957	Unknown	0.867	0.991	0.867	0.1	0.2	0.1	0.2	Non	Non	Non
Non	Cla000958	Unknown	0.969	0.97	0.969	1	1	1	1	Non	Non	Non
Non	Cla000959	OTU	0.971	0.271	0.38	15.5	16.6	21.2	21.9	Non	Non	Non
Non	Cla000960	Unknown	0.969	0.97	0.969	1	1	1	1	Non	Non	Non
Non	Cla000961	Unknown	0.969	0.97	0.969	1	1	1	1	Non	Non	Non
Non	Cla000962	Unknown	0.969	0.97	0.447	1	1	1	0.2	Non	Non	Non
Non	Cla000963	Unknown	0.407	0.376	0.407	0.1	1	1	1	Non	Non	Non
Non	Cla000964	Spermidine	0.846	0.526	0.581	0.7	1	1.6	1.6	Non	Non	Non
Non	Cla000966	Bidirectional	0.969	0.97	0.969	1	1	1	1	Non	Non	Non
Non	Cla000967	Bidirectional	0.969	0.97	0.969	1	1	1	1	Non	Non	Non
Non	Cla000968	Basic	0.969	0.97	0.375	1	1	1	0.1	Non	Non	Non
Non	Cla000969	Unknown	0.843	0.866	0.813	0.2	0.1	0.1	0.4	Non	Non	Non
Non	Cla000970	RING	0.94	0.437	0.175	8.3	9.1	5.1	3.9	Non	Non	Non
Non	Cla000971	Protein-tyrosine	0.783	0.31	0.828	5.6	5	2.5	6.7	Non	Non	Non
Non	Cla000972	Peroxisomal	0.969	0.97	0.969	1	1	1	1	Non	Non	Non
Non	Cla000974	Poly	0.967	0.449	0.175	3.8	3.9	5.9	9	Non	Non	Non
Non	Cla000975	Dof	0.583	0.501	0.284	3.2	5	1.6	1.1	Non	Non	Non
Non	Cla000976	Serine/threonine-protein	0.812	0.378	0.576	15.5	17.8	19.8	19.8	Non	Non	Non
Non	Cla000980	Phosphate	0.473	0.86	0.567	5.2	8.2	4.4	7.6	Non	Non	Non
Sig4	Cla000981	Protein	0.743	0.352	0.023	18.5	21.7	12.5	7.6	Non	Non	Sig
Non	Cla000982	MRNA	0.743	0.395	0.12	4.3	3.6	2	0.9	Non	Non	Non
Non	Cla000983	Mitochondrial	0.915	0.636	0.806	2.5	2.4	3.5	2.1	Non	Non	Non
Non	Cla000984	Unknown	0.903	0.987	0.986	0.2	0.3	0.2	0.2	Non	Non	Non
Non	Cla000986	Unknown	0.969	0.97	0.969	1	1	1	1	Non	Non	Non
Non	Cla000987	Unknown	0.969	0.97	0.969	1	1	1	1	Non	Non	Non
Non	Cla000988	Os03g0425000	0.843	0.203	0.204	19.2	21.6	26.6	12.9	Non	Non	Non
Non	Cla000989	Gag/pol	0.903	0.581	0.813	0.2	0.3	0.7	0.4	Non	Non	Non
Non	Cla000990	Unknown	0.969	0.406	0.375	1	1	0.1	0.1	Non	Non	Non
Non	Cla000991	Unknown	0.737	0.78	0.903	0.2	0.5	0.4	0.3	Non	Non	Non
Non	Cla000992	Vacuolar	0.763	0.306	0.231	3.6	4.7	6.6	8	Non	Non	Non
Non	Cla000993	Unknown	0.983	0.764	0.872	0.3	0.3	0.1	0.2	Non	Non	Non
Non	Cla000994	Unknown	0.969	0.97	0.375	1	1	1	0.1	Non	Non	Non
Non	Cla000995	Unknown	0.969	0.72	0.925	1	1	1.5	1.2	Non	Non	Non
Non	Cla000996	Zinc	0.408	0.17	0.879	4.1	2.2	0.9	4.8	Non	Non	Non
Sig3.4	Cla000997	Vesicle-associated	0.762	0.024	0.032	25.8	29.6	42.7	45.9	Non	Sig	Sig
Non	Cla000998	Unknown	0.969	0.97	0.969	1	1	1	1	Non	Non	Non
Non	Cla000999	Unknown	0.762	0.636	0.768	2.5	3.4	3.5	2	Non	Non	Non
Non	Cla001000	Unknown	0.969	0.97	0.969	1	1	1	1	Non	Non	Non
Non	Cla001001	Zinc	0.758	0.082	0.347	3.5	2.9	9.4	6.8	Non	Non	Non
Sig3	Cla001002	Zinc-finger	0.782	0.011	0.234	5.4	4.8	16.7	10.6	Non	Sig	Non
Non	Cla001003	Exocyst	0.53	0.415	0.481	4.7	7.2	7.2	7.5	Non	Non	Non
Non	Cla001004	Ribonuclease	0.947	0.712	0.472	0.5	0.6	0.9	1.6	Non	Non	Non
Non	Cla001005	Ribonuclease	0.804	0.979	0.879	0.5	0.3	0.5	0.7	Non	Non	Non
Non	Cla001006	Phloem	0.693	0.878	0.314	1.8	1.2	2	4.5	Non	Non	Non
Sig4	Cla001007	Phloem	0.713	0.434	0.037	3	2.3	5	11.3	Non	Non	Sig
Non	Cla001008	Unknown	0.969	0.97	0.969	1	1	1	1	Non	Non	Non
Non	Cla001009	Unknown	0.969	0.97	0.969	1	1	1	1	Non	Non	Non
Non	Cla001010	Unknown	0.969	0.97	0.969	1	1	1	1	Non	Non	Non
Non	Cla001011	RING	0.955	0.629	0.561	0.6	0.7	1.2	1.5	Non	Non	Non
Non	Cla001012	DNA	0.698	0.431	0.503	1.6	2.5	3.2	3.2	Non	Non	Non
Non	Cla001013	DNA	0.905	0.69	0.962	0.7	0.6	1.2	0.8	Non	Non	Non
Non	Cla001015	Unknown	0.969	0.97	0.969	1	1	1	1	Non	Non	Non
Non	Cla001016	Pentatricopeptide	0.955	0.782	0.901	0.6	0.7	0.9	0.5	Non	Non	Non
Non	Cla001017	Cc-nbs-lrr	0.586	0.345	0.503	2.9	4.6	5.4	5	Non	Non	Non
Non	Cla001018	Unknown	0.578	0.206	0.326	5.9	8.4	10.6	10.3	Non	Non	Non
Non	Cla001019	Thaumatin-like	0.969	0.97	0.969	1	1	1	1	Non	Non	Non
Non	Cla001020	Ras-related	0.774	0.583	0.933	4.6	4	2.9	4.6	Non	Non	Non
Non	Cla001021	Unknown	0.969	0.97	0.969	1	1	1	1	Non	Non	Non
Non	Cla001022	Unknown	0.969	0.97	0.969	1	1	1	1	Non	Non	Non
Non	Cla001023	Unknown	0.969	0.97	0.969	1	1	1	1	Non	Non	Non
Non	Cla001024	YTH	0.779	0.886	0.474	10.5	9.8	10.6	14.8	Non	Non	Non
Non	Cla001025	Tubulin-specific	0.7	0.367	0.487	2.4	3.5	4.6	4.4	Non	Non	Non
Non	Cla001026	Tubulin	0.957	0.607	0.854	1.9	1.9	2.9	2.4	Non	Non	Non
Non	Cla001027	Unknown	0.969	0.97	0.969	1	1	1	1	Non	Non	Non
Non	Cla001028	Unknown	0.969	0.406	0.969	1	1	0.1	1	Non	Non	Non
Non	Cla001029	Cytochrome	0.407	0.376	0.407	0.1	1	1	1	Non	Non	Non
Non	Cla001030	Unknown	0.969	0.97	0.375	1	1	1	0.1	Non	Non	Non
Non	Cla001031	Unknown	0.969	0.97	0.969	1	1	1	1	Non	Non	Non
Non	Cla001032	Armadillo/beta-catenin-like	0.256	0.237	0.175	2.7	0.7	0.5	0.4	Non	Non	Non
Non	Cla001033	Unknown	0.969	0.97	0.969	1	1	1	1	Non	Non	Non
Non	Cla001034	Unknown	0.99	0.376	0.765	0.1	0.1	1	0.3	Non	Non	Non
Non	Cla001035	Unknown	0.969	0.97	0.969	1	1	1	1	Non	Non	Non
Non	Cla001036	Unknown	0.969	0.97	0.969	1	1	1	1	Non	Non	Non
Non	Cla001037	Unknown	0.892	0.782	0.82	0.6	0.8	0.9	0.4	Non	Non	Non
Non	Cla001038	Unknown	0.615	0.805	0.916	2.3	3.7	1.7	2.2	Non	Non	Non
Sig4	Cla001039	Esterase/lipase/thioesterase	0.504	0.063	0.016	3.2	5.4	9.5	13.5	Non	Non	Sig
Non	Cla001040	Zinc	0.969	0.97	0.969	1	1	1	1	Non	Non	Non
Non	Cla001041	LOC443587	0.386	0.145	0.287	23.2	31.1	32.6	32.7	Non	Non	Non
Non	Cla001042	Shikimate	0.771	0.451	0.116	18	20.9	21.7	10.4	Non	Non	Non
Non	Cla001043	Unknown	0.969	0.97	0.969	1	1	1	1	Non	Non	Non
Non	Cla001044	Unknown	0.969	0.97	0.969	1	1	1	1	Non	Non	Non
Non	Cla001045	Harpin-induced	0.325	0.238	0.133	2.9	6.1	0.6	0.3	Non	Non	Non
Non	Cla001046	Late	0.969	0.97	0.969	1	1	1	1	Non	Non	Non
Non	Cla001047	Unknown	0.969	0.97	0.969	1	1	1	1	Non	Non	Non
Non	Cla001048	Yellow-leaf-specific	0.567	0.866	0.484	0.2	0.8	0.1	1	Non	Non	Non
Non	Cla001049	Yellow-leaf-specific	0.728	0.565	0.778	0.6	1.1	0.1	1	Non	Non	Non
Non	Cla001050	Unknown	0.99	0.445	0.62	0.1	0.1	0.8	0.5	Non	Non	Non
Non	Cla001051	Unknown	0.969	0.97	0.969	1	1	1	1	Non	Non	Non
Non	Cla001052	Unknown	0.969	0.97	0.969	1	1	1	1	Non	Non	Non
Non	Cla001053	Histone	0.969	0.97	0.375	1	1	1	0.1	Non	Non	Non
Non	Cla001054	PLATZ	0.675	0.541	0.675	0.8	1.5	1.7	1.5	Non	Non	Non
Non	Cla001055	RecQ-mediated	0.927	0.551	0.875	1.9	2.2	3.1	1.7	Non	Non	Non
Non	Cla001056	Magnesium	0.873	0.096	0.755	12.6	12.5	21.4	15	Non	Non	Non
Non	Cla001058	Unknown	0.375	0.406	0.969	1	0.1	0.1	1	Non	Non	Non
Sig4	Cla001059	RING	0.458	0.974	0.014	3.6	2	3.5	14.5	Non	Non	Sig
Non	Cla001060	Ubiquitin-conjugating	0.895	0.936	0.538	0.5	0.4	0.4	1.4	Non	Non	Non
Non	Cla001061	Unknown	0.178	0.695	0.16	4	1.1	2.8	1	Non	Non	Non
Non	Cla001062	Altered	0.716	0.813	0.819	3.1	2.4	2.4	3.9	Non	Non	Non
Non	Cla001063	Gypsy-like	0.969	0.97	0.969	1	1	1	1	Non	Non	Non
Non	Cla001064	Transmembrane	0.952	0.676	0.941	2.3	2.3	1.4	2.6	Non	Non	Non
Non	Cla001065	Unknown	0.969	0.97	0.969	1	1	1	1	Non	Non	Non
Non	Cla001066	Unknown	0.969	0.97	0.969	1	1	1	1	Non	Non	Non
Non	Cla001067	BZIP	0.657	0.59	0.863	0.4	0.1	1	0.6	Non	Non	Non
Non	Cla001069	Retrotransposon	0.843	0.866	0.416	0.2	0.1	0.1	1.2	Non	Non	Non
Non	Cla001070	Alpha/beta	0.738	0.922	0.738	0.4	0.8	0.3	0.8	Non	Non	Non
Non	Cla001072	Unknown	0.969	0.97	0.969	1	1	1	1	Non	Non	Non
Non	Cla001073	Unknown	0.969	0.97	0.969	1	1	1	1	Non	Non	Non
Non	Cla001074	Unknown	0.969	0.97	0.969	1	1	1	1	Non	Non	Non
Non	Cla001075	Acetolactate	0.527	0.979	0.682	11.3	15.3	10.6	10	Non	Non	Non
Non	Cla001076	Ribulose	0.834	0.409	0.282	2	1.7	0.6	0.4	Non	Non	Non
Non	Cla001077	Unknown	0.969	0.97	0.969	1	1	1	1	Non	Non	Non
Non	Cla001078	Unknown	0.407	0.991	0.407	0.1	1	0.1	1	Non	Non	Non
Non	Cla001079	Unknown	0.969	0.97	0.969	1	1	1	1	Non	Non	Non
Non	Cla001080	Polygalacturonase	0.969	0.97	0.589	1	1	1	0.4	Non	Non	Non
Non	Cla001081	Unknown	0.969	0.97	0.969	1	1	1	1	Non	Non	Non
Non	Cla001082	Unknown	0.99	0.376	0.407	0.1	0.1	1	1	Non	Non	Non
Non	Cla001083	Unknown	0.969	0.97	0.969	1	1	1	1	Non	Non	Non
Non	Cla001084	Peroxidase	0.969	0.97	0.969	1	1	1	1	Non	Non	Non
Non	Cla001085	Unknown	0.969	0.97	0.969	1	1	1	1	Non	Non	Non
Non	Cla001086	Unknown	0.969	0.406	0.375	1	1	0.1	0.1	Non	Non	Non
Non	Cla001087	Unknown	0.969	0.97	0.969	1	1	1	1	Non	Non	Non
Non	Cla001088	Late	0.375	0.97	0.969	1	0.1	1	1	Non	Non	Non
Sig4	Cla001089	Os04g0413100	0.374	0.34	0.00337	15.1	21.5	9.7	3.1	Non	Non	Sig
Non	Cla001090	N-carbamoylputrescine	0.843	0.366	0.592	3	3.7	5.4	4.7	Non	Non	Non
Non	Cla001091	N-carbamoylputrescine	0.702	0.427	0.493	1.3	2.1	2.8	2.8	Non	Non	Non
Non	Cla001092	N-carbamoylputrescine	0.655	0.263	0.276	2.9	4.3	6	6.5	Non	Non	Non
Non	Cla001093	Unknown	0.969	0.97	0.969	1	1	1	1	Non	Non	Non
Non	Cla001094	Calpain-2	0.998	0.361	0.161	3.6	3.8	6.2	8.9	Non	Non	Non
Non	Cla001096	Unknown	0.969	0.97	0.969	1	1	1	1	Non	Non	Non
Non	Cla001097	Ferredoxin	0.765	0.284	0.879	2.4	1.9	0.5	2.2	Non	Non	Non
Sig2	Cla001098	Ribosomal	0.015	0.084	0.176	19.6	7.7	9.5	12.8	Sig	Non	Non
Sig4	Cla001099	Copper-translocating	0.454	0.105	0.038	16.8	22.6	26.3	32.8	Non	Non	Sig
Non	Cla001100	Heavy	0.913	0.969	0.913	1.1	1	1.1	1	Non	Non	Non
Non	Cla001101	Unknown	0.842	0.902	0.983	0.3	0.5	0.2	0.3	Non	Non	Non
Non	Cla001102	Potassium	0.638	0.396	0.756	22.5	27.2	16.2	26	Non	Non	Non
Non	Cla001103	30S	0.978	0.439	0.249	9.1	9.5	12.1	15.5	Non	Non	Non
Non	Cla001104	Dentin	0.979	0.464	0.257	18.6	19.5	13.6	13.1	Non	Non	Non
Non	Cla001105	Unknown	0.969	0.97	0.969	1	1	1	1	Non	Non	Non
Non	Cla001106	Pentatricopeptide	0.958	0.247	0.446	1.7	1.9	4.4	3.6	Non	Non	Non
Sig4	Cla001107	Endoplasmic	0.751	0.187	0.028	5.7	7.2	10.6	16.7	Non	Non	Sig
Non	Cla001108	Receptor	0.765	0.376	0.99	0.1	0.3	1	0.1	Non	Non	Non
Non	Cla001109	Unknown	0.914	0.818	0.863	1.3	1.2	0.9	1.1	Non	Non	Non
Non	Cla001110	Unknown	0.84	0.737	0.968	0.8	0.6	0.4	0.9	Non	Non	Non
Non	Cla001111	Vesicular	0.996	0.711	0.429	5.5	5.8	4.1	8.9	Non	Non	Non
Non	Cla001114	Unknown	0.969	0.97	0.969	1	1	1	1	Non	Non	Non
Non	Cla001115	Sugar	0.526	0.088	0.166	7	10.1	14.3	13.9	Non	Non	Non
Non	Cla001116	Transcription	0.457	0.903	0.746	6.2	4.1	6.3	7.8	Non	Non	Non
Non	Cla001117	Exportin-1	0.786	0.062	0.087	35.9	35.6	51	54.7	Non	Non	Non
Non	Cla001118	Unknown	0.969	0.97	0.969	1	1	1	1	Non	Non	Non
Non	Cla001119	Unknown	0.969	0.97	0.969	1	1	1	1	Non	Non	Non
Non	Cla001120	Dihydroneopterin	0.862	0.828	0.678	1.4	1.8	1.7	2.3	Non	Non	Non
Non	Cla001121	Unknown	0.98	0.981	0.635	0.4	0.4	0.4	1	Non	Non	Non
Non	Cla001122	Unknown	0.375	0.97	0.969	1	0.1	1	1	Non	Non	Non
Non	Cla001123	Unknown	0.867	0.376	0.99	0.1	0.2	1	0.1	Non	Non	Non
Non	Cla001124	(RAP	0.963	0.965	0.747	1.4	1.4	1.4	2.1	Non	Non	Non
Non	Cla001125	Serine/threonine-protein	0.66	0.197	0.222	21.9	26.3	29.8	32.4	Non	Non	Non
Non	Cla001126	Phosphatidic	0.973	0.743	0.582	2.2	2.4	2.8	3.7	Non	Non	Non
Non	Cla001127	Sphingosine-1-phosphate	0.894	0.549	0.834	2.8	3.3	4.2	3.5	Non	Non	Non
Non	Cla001128	Unknown	0.969	0.97	0.969	1	1	1	1	Non	Non	Non
Non	Cla001129	Unknown	0.969	0.97	0.969	1	1	1	1	Non	Non	Non
Non	Cla001130	Unknown	0.969	0.97	0.969	1	1	1	1	Non	Non	Non
Non	Cla001131	Transcription	0.969	0.97	0.969	1	1	1	1	Non	Non	Non
Non	Cla001132	Unknown	0.969	0.97	0.969	1	1	1	1	Non	Non	Non
Non	Cla001133	Unknown	0.969	0.97	0.375	1	1	1	0.1	Non	Non	Non
Non	Cla001134	Unknown	0.969	0.97	0.969	1	1	1	1	Non	Non	Non
Non	Cla001135	Unknown	0.969	0.97	0.969	1	1	1	1	Non	Non	Non
Non	Cla001136	Unknown	0.969	0.97	0.969	1	1	1	1	Non	Non	Non
Non	Cla001137	Unknown	0.407	0.991	0.867	0.1	1	0.1	0.2	Non	Non	Non
Non	Cla001138	Cytochrome	0.63	0.915	0.852	1	1.9	1.1	0.8	Non	Non	Non
Non	Cla001139	Bis(5&apos-adenosyl)-triphosphatase	0.969	0.97	0.969	1	1	1	1	Non	Non	Non
Non	Cla001141	AT5g06970/MOJ9_14	0.375	0.406	0.725	1	0.1	0.1	0.6	Non	Non	Non
Sig4	Cla001142	Ring	0.445	0.358	0.028	6.6	10.2	9.9	18.2	Non	Non	Sig
Sig4	Cla001143	E3	0.658	0.269	0.018	9.7	12.4	14.5	24.5	Non	Non	Sig
Non	Cla001144	Replication	0.993	0.561	0.962	3.1	3.3	4.5	3.4	Non	Non	Non
Non	Cla001145	Replication	0.976	0.715	0.84	2.3	2.5	3	2	Non	Non	Non
Non	Cla001146	Membrane	0.984	0.123	0.158	5.7	6.1	1.4	2	Non	Non	Non
Non	Cla001147	Pentatricopeptide	0.854	0.376	0.308	4.4	4.1	7.1	8.4	Non	Non	Non
Sig4	Cla001148	Hydroxymethylglutaryl-CoA	0.446	0.893	0.014	10.2	14.7	9.1	26	Non	Non	Sig
Sig4	Cla001149	Phospholipase	0.396	0.742	0.012	1.6	3.7	1	10.8	Non	Non	Sig
Non	Cla001151	Expansin-like	0.969	0.97	0.969	1	1	1	1	Non	Non	Non
Non	Cla001152	Unknown	0.852	0.765	0.277	1	0.8	1.4	3.4	Non	Non	Non
Non	Cla001153	Transcription	0.81	0.702	0.897	1.3	1	1.9	1.6	Non	Non	Non
Non	Cla001154	Histone	0.916	0.53	0.415	1.6	1.5	2.8	3.6	Non	Non	Non
Non	Cla001156	Unknown	0.88	0.648	0.948	2.8	2.6	3.8	2.8	Non	Non	Non
Non	Cla001157	Cu/Zn-superoxide	0.973	0.915	0.722	3.3	3.4	3.4	2.6	Non	Non	Non
Non	Cla001158	Superoxide	0.924	0.916	0.987	2.8	3.2	2.9	3	Non	Non	Non
Non	Cla001159	Chromosome	0.707	0.811	0.741	16.7	20	17.2	19.7	Non	Non	Non
Sig3.4	Cla001160	Phosphoenolpyruvate/phosphate	0.83	0.00739	0.00244	10.3	9.9	1	0.6	Non	Sig	Sig
Non	Cla001161	C4-dicarboxylate	0.461	0.597	0.962	3.1	5.5	1.8	3.4	Non	Non	Non
Non	Cla001162	Cell	0.769	0.617	0.562	1.5	1.1	0.7	0.7	Non	Non	Non
Sig3	Cla001163	Receptor-like	0.228	0.00207	0.105	16.6	25.6	2.6	9.1	Non	Sig	Non
Non	Cla001165	Bile	0.91	0.688	0.349	3.3	3.8	4.2	6.5	Non	Non	Non
Non	Cla001166	Ycf49	0.916	0.7	0.377	2.1	2	1.3	0.7	Non	Non	Non
Non	Cla001167	ACT	0.991	0.256	0.76	3	3.2	6.2	4	Non	Non	Non
Non	Cla001168	NBS-LRR	0.565	0.862	0.145	1	2.1	1.2	4.6	Non	Non	Non
Non	Cla001169	Serine/threonine-protein	0.9	0.161	0.308	4.9	5.6	9.9	9.1	Non	Non	Non
Non	Cla001170	Unknown	0.969	0.97	0.969	1	1	1	1	Non	Non	Non
Non	Cla001171	Nucleoredoxin	0.561	0.887	0.117	6.3	9	5.5	13.9	Non	Non	Non
Non	Cla001172	Unknown	0.99	0.991	0.407	0.1	0.1	0.1	1	Non	Non	Non
Non	Cla001173	Unknown	0.969	0.97	0.969	1	1	1	1	Non	Non	Non
Non	Cla001174	Ty3-gypsy	0.969	0.97	0.969	1	1	1	1	Non	Non	Non
Non	Cla001175	Unknown	0.518	0.406	0.447	1	0.3	0.1	0.2	Non	Non	Non
Non	Cla001176	Unknown	0.969	0.97	0.969	1	1	1	1	Non	Non	Non
Non	Cla001177	Unknown	0.969	0.97	0.969	1	1	1	1	Non	Non	Non
Non	Cla001178	Unknown	0.969	0.97	0.969	1	1	1	1	Non	Non	Non
Non	Cla001179	Unknown	0.974	0.709	0.831	0.7	0.7	0.3	0.5	Non	Non	Non
Non	Cla001180	Unknown	0.969	0.97	0.969	1	1	1	1	Non	Non	Non
Non	Cla001181	Cytochrome	0.849	0.923	0.501	10.2	11.7	10.1	14.2	Non	Non	Non
Non	Cla001182	Unknown	0.969	0.97	0.969	1	1	1	1	Non	Non	Non
Non	Cla001183	VQ	0.969	0.97	0.969	1	1	1	1	Non	Non	Non
Non	Cla001184	Unknown	0.407	0.376	0.99	0.1	1	1	0.1	Non	Non	Non
Non	Cla001186	Unknown	0.969	0.97	0.969	1	1	1	1	Non	Non	Non
Non	Cla001187	Unknown	0.872	0.984	0.247	0.3	0.2	0.3	2.2	Non	Non	Non
Non	Cla001188	Unknown	0.969	0.97	0.375	1	1	1	0.1	Non	Non	Non
Non	Cla001191	Unknown	0.969	0.97	0.969	1	1	1	1	Non	Non	Non
Non	Cla001192	Unknown	0.375	0.406	0.375	1	0.1	0.1	0.1	Non	Non	Non
Non	Cla001193	Glucose-6-phosphate	0.969	0.97	0.969	1	1	1	1	Non	Non	Non
Non	Cla001195	Unknown	0.969	0.97	0.969	1	1	1	1	Non	Non	Non
Non	Cla001196	Voltage-gated	0.99	0.46	0.873	12.8	13.6	16	12.7	Non	Non	Non
Non	Cla001197	Unknown	0.969	0.97	0.375	1	1	1	0.1	Non	Non	Non
Non	Cla001198	Unknown	0.969	0.97	0.969	1	1	1	1	Non	Non	Non
Non	Cla001200	Unknown	0.969	0.97	0.969	1	1	1	1	Non	Non	Non
Non	Cla001201	Unknown	0.969	0.97	0.969	1	1	1	1	Non	Non	Non
Non	Cla001202	Unknown	0.923	0.764	0.739	0.3	0.4	0.1	0.1	Non	Non	Non
Non	Cla001203	Protein	0.639	0.415	0.494	0.6	1.3	1.8	1.7	Non	Non	Non
Non	Cla001204	3-hydroxy-3-methylglutaryl	0.976	0.546	0.101	0.6	0.6	1.4	4.4	Non	Non	Non
Non	Cla001205	Photosystem	0.407	0.376	0.407	0.1	1	1	1	Non	Non	Non
Non	Cla001206	Unknown	0.969	0.97	0.969	1	1	1	1	Non	Non	Non
Non	Cla001208	Unknown	0.969	0.97	0.969	1	1	1	1	Non	Non	Non
Non	Cla001209	Unknown	0.969	0.97	0.969	1	1	1	1	Non	Non	Non
Non	Cla001210	Proliferating	0.969	0.97	0.969	1	1	1	1	Non	Non	Non
Non	Cla001211	Unknown	0.969	0.97	0.969	1	1	1	1	Non	Non	Non
Non	Cla001212	CLAVATA3/ESR	0.969	0.97	0.969	1	1	1	1	Non	Non	Non
Non	Cla001213	Unknown	0.375	0.971	0.969	1	0.1	0.9	1	Non	Non	Non
Non	Cla001214	Unknown	0.407	0.991	0.99	0.1	1	0.1	0.1	Non	Non	Non
Non	Cla001215	Unknown	0.969	0.97	0.969	1	1	1	1	Non	Non	Non
Non	Cla001216	Adenosine	0.765	0.753	0.609	6.3	5.6	7.1	4.9	Non	Non	Non
Non	Cla001217	Glycosyltransferase	0.923	0.887	0.772	0.3	0.4	0.4	0.6	Non	Non	Non
Non	Cla001218	Phosphoribosyltransferase	0.397	0.357	0.163	17.9	24.6	22.7	28.7	Non	Non	Non
Sig4	Cla001219	AT	0.723	0.053	0.0071	36.2	35.2	20.2	17.9	Non	Non	Sig
Non	Cla001220	Unknown	0.873	0.601	0.813	1.8	1.6	2.8	2.4	Non	Non	Non
Non	Cla001221	Unknown	0.912	0.678	0.829	1	0.9	1.6	1.4	Non	Non	Non
Non	Cla001223	Calmodulin-binding	0.314	0.85	0.764	11.3	17.5	11.6	10.5	Non	Non	Non
Non	Cla001224	Beta-amylase	0.88	0.651	0.34	6	6.9	7.3	10.3	Non	Non	Non
Non	Cla001225	Os02g0225300	0.786	0.507	0.091	2.4	3.2	3.9	8.2	Non	Non	Non
Non	Cla001226	Myc	0.961	0.723	0.473	11.4	12.3	12.5	15.9	Non	Non	Non
Non	Cla001227	Gibberellin	0.842	0.887	0.709	0.3	0.5	0.4	0.7	Non	Non	Non
Non	Cla001228	ROP	0.697	0.901	0.767	2.6	1.9	2.2	3.5	Non	Non	Non
Non	Cla001229	Unknown	0.663	0.667	0.722	1.9	3	2.7	2.8	Non	Non	Non
Non	Cla001230	Legumin-like	0.407	0.376	0.407	0.1	1	1	1	Non	Non	Non
Non	Cla001231	Receptor-like	0.886	0.812	0.657	0.4	0.3	0.2	0.1	Non	Non	Non
Non	Cla001233	Signal	0.566	0.253	0.089	2	3.5	4.8	7.5	Non	Non	Non
Non	Cla001234	Glycerol-3-phosphate	0.373	0.357	0.958	13.9	10.2	8.9	14.4	Non	Non	Non
Sig3.4	Cla001235	Cytochrome	0.983	0.011	0.029	27.2	28.6	10.6	14.3	Non	Sig	Sig
Non	Cla001236	Origin	0.989	0.479	0.479	2.3	2.4	3.9	4.3	Non	Non	Non
Sig4	Cla001237	HAD	0.462	0.214	0.00473	34	29.9	23.1	15.5	Non	Non	Sig
Sig2.3	Cla001238	Cysteine	3.08e-05	4.98e-05	0.664	127.5	74	66	127.6	Sig	Sig	Non
Non	Cla001239	ARID/BRIGHT	0.892	0.727	0.436	0.6	0.8	1	1.9	Non	Non	Non
Non	Cla001240	Multidrug	0.969	0.97	0.969	1	1	1	1	Non	Non	Non
Non	Cla001241	Pentatricopeptide	0.769	0.678	0.962	1.5	1.1	2.2	1.5	Non	Non	Non
Non	Cla001242	Transmembrane	0.675	0.65	0.114	3.7	5.2	4.8	9.9	Non	Non	Non
Non	Cla001243	HMG-I	0.82	0.771	0.891	0.6	0.4	0.3	0.8	Non	Non	Non
Non	Cla001244	Leucine-rich	0.969	0.97	0.969	1	1	1	1	Non	Non	Non
Non	Cla001245	Unknown	0.82	0.841	0.535	0.6	0.4	0.8	0.1	Non	Non	Non
Non	Cla001246	Pathogenesis-related	0.99	0.376	0.867	0.1	0.1	1	0.2	Non	Non	Non
Non	Cla001247	Leucine-rich	0.375	0.406	0.375	1	0.1	0.1	0.1	Non	Non	Non
Non	Cla001248	Unknown	0.868	0.36	0.968	10.4	11.8	14.3	10.8	Non	Non	Non
Non	Cla001249	Unknown	0.99	0.991	0.99	0.1	0.1	0.1	0.1	Non	Non	Non
Non	Cla001251	Squalene	0.387	0.601	0.926	24.9	33.1	20.2	27	Non	Non	Non
Non	Cla001252	Unknown	0.969	0.97	0.969	1	1	1	1	Non	Non	Non
Non	Cla001253	Unknown	0.404	0.284	0.984	2.6	1.1	0.6	2.7	Non	Non	Non
Non	Cla001255	Unknown	0.99	0.844	0.765	0.1	0.1	0.2	0.3	Non	Non	Non
Non	Cla001256	Unknown	0.375	0.559	0.375	1	0.1	0.3	0.1	Non	Non	Non
Non	Cla001257	Unknown	0.407	0.376	0.99	0.1	1	1	0.1	Non	Non	Non
Non	Cla001258	MtN19-like	0.463	0.667	0.984	2.6	4.8	3.5	2.7	Non	Non	Non
Non	Cla001260	Unknown	0.867	0.991	0.867	0.1	0.2	0.1	0.2	Non	Non	Non
Non	Cla001261	Unknown	0.969	0.97	0.969	1	1	1	1	Non	Non	Non
Non	Cla001262	Unknown	0.969	0.97	0.969	1	1	1	1	Non	Non	Non
Non	Cla001263	Abhydrolase	0.863	0.512	0.585	1.3	1.1	0.4	0.6	Non	Non	Non
Non	Cla001264	Unknown	0.969	0.97	0.969	1	1	1	1	Non	Non	Non
Non	Cla001265	Unknown	0.937	0.821	0.937	0.4	0.5	0.6	0.5	Non	Non	Non
Non	Cla001266	Unknown	0.375	0.97	0.375	1	0.1	1	0.1	Non	Non	Non
Non	Cla001267	Unknown	0.969	0.97	0.969	1	1	1	1	Non	Non	Non
Non	Cla001268	class	0.969	0.97	0.969	1	1	1	1	Non	Non	Non
Non	Cla001270	Unknown	0.969	0.406	0.375	1	1	0.1	0.1	Non	Non	Non
Non	Cla001271	Unknown	0.969	0.97	0.969	1	1	1	1	Non	Non	Non
Non	Cla001272	Unknown	0.969	0.97	0.969	1	1	1	1	Non	Non	Non
Non	Cla001273	Unknown	0.407	0.376	0.407	0.1	1	1	1	Non	Non	Non
Non	Cla001274	Unknown	0.71	0.764	0.983	0.3	0.7	0.1	0.3	Non	Non	Non
Non	Cla001275	Unknown	0.983	0.764	0.872	0.3	0.3	0.1	0.2	Non	Non	Non
Non	Cla001276	Unknown	0.969	0.97	0.375	1	1	1	0.1	Non	Non	Non
Non	Cla001277	Unknown	0.969	0.97	0.969	1	1	1	1	Non	Non	Non
Non	Cla001278	Unknown	0.407	0.991	0.407	0.1	1	0.1	1	Non	Non	Non
Non	Cla001279	Unknown	0.886	0.505	0.738	0.4	0.3	1.2	0.8	Non	Non	Non
Non	Cla001280	Unknown	0.969	0.97	0.969	1	1	1	1	Non	Non	Non
Non	Cla001281	Unknown	0.903	0.703	0.737	0.2	0.3	0.5	0.5	Non	Non	Non
Non	Cla001282	Unknown	0.969	0.97	0.969	1	1	1	1	Non	Non	Non
Non	Cla001283	Microtubule-associated	0.649	0.75	0.387	15.9	19.6	13.4	12.1	Non	Non	Non
Non	Cla001284	Unknown	0.969	0.97	0.969	1	1	1	1	Non	Non	Non
Non	Cla001285	Glycosyltransferase	0.867	0.991	0.99	0.1	0.2	0.1	0.1	Non	Non	Non
Non	Cla001286	Protein	0.454	0.126	0.455	10.6	7.9	4.3	7.9	Non	Non	Non
Non	Cla001287	Unknown	0.969	0.862	0.925	1	1	1.2	1.2	Non	Non	Non
Non	Cla001288	Unknown	0.969	0.97	0.969	1	1	1	1	Non	Non	Non
Non	Cla001289	Unknown	0.738	0.131	0.201	2.7	2.1	0.1	0.5	Non	Non	Non
Non	Cla001291	Unknown	0.983	0.984	0.739	0.3	0.3	0.3	0.1	Non	Non	Non
Non	Cla001292	Unknown	0.969	0.97	0.969	1	1	1	1	Non	Non	Non
Sig3.4	Cla001293	BTB/POZ	0.254	2.01e-06	5.16e-10	43	35.1	7.8	2.4	Non	Sig	Sig
Non	Cla001294	Unknown	0.867	0.844	0.99	0.1	0.2	0.2	0.1	Non	Non	Non
Non	Cla001295	Unknown	0.407	0.991	0.867	0.1	1	0.1	0.2	Non	Non	Non
Non	Cla001296	Transcription	0.941	0.799	0.785	5.8	6.4	4.7	5.2	Non	Non	Non
Non	Cla001297	Conserved	0.884	0.865	0.716	1.1	1.4	1.3	1.8	Non	Non	Non
Non	Cla001298	2-oxoglutarate-dependent	0.969	0.97	0.969	1	1	1	1	Non	Non	Non
Non	Cla001299	Unknown	0.937	0.981	0.98	0.4	0.5	0.4	0.4	Non	Non	Non
Non	Cla001300	FolD	0.677	0.364	0.995	9.3	11.8	13	9.8	Non	Non	Non
Sig2.3.4	Cla001301	Hydroxycinnamoyl-CoA	0.0075	4.72e-10	4.45e-12	46.2	79.7	1.8	0.3	Sig	Sig	Sig
Non	Cla001302	Unknown	0.969	0.483	0.658	1	1	0.2	0.5	Non	Non	Non
Non	Cla001303	Hydroxycinnamoyl	0.728	0.727	0.778	0.6	1.1	1	1	Non	Non	Non
Non	Cla001304	Gag/pol	0.969	0.97	0.375	1	1	1	0.1	Non	Non	Non
Non	Cla001305	Regulator	0.82	0.82	0.52	1.9	2.5	1.4	0.9	Non	Non	Non
Non	Cla001307	Intracellular	0.847	0.249	0.105	3.1	3.8	6.4	9.1	Non	Non	Non
Non	Cla001308	Intracellular	0.867	0.991	0.99	0.1	0.2	0.1	0.1	Non	Non	Non
Non	Cla001309	Ty3-gypsy	0.969	0.97	0.969	1	1	1	1	Non	Non	Non
Non	Cla001310	Gypsy-like	0.99	0.991	0.99	0.1	0.1	0.1	0.1	Non	Non	Non
Non	Cla001311	Unknown	0.375	0.97	0.375	1	0.1	1	0.1	Non	Non	Non
Non	Cla001312	Unknown	0.969	0.97	0.969	1	1	1	1	Non	Non	Non
Non	Cla001313	Potassium	0.471	0.178	0.045	2.2	4.2	5.8	9.3	Non	Non	Non
Non	Cla001314	Periplasmic	0.717	0.446	0.471	2.2	1.6	0.8	1	Non	Non	Non
Non	Cla001315	GEX1	0.847	0.901	0.651	0.9	0.7	0.7	1.7	Non	Non	Non
Non	Cla001316	Rapid	0.969	0.97	0.969	1	1	1	1	Non	Non	Non
Sig4	Cla001317	Homology	0.501	0.763	0.043	15.8	20.9	13.4	6.8	Non	Non	Sig
Non	Cla001318	Alkylated	0.941	0.361	0.34	2.3	2.6	4.5	5.1	Non	Non	Non
Non	Cla001319	Receptor-like	0.843	0.866	0.448	0.2	0.1	0.1	1.1	Non	Non	Non
Non	Cla001320	Receptor-like	0.673	0.638	0.122	0.2	0.6	0.6	3.1	Non	Non	Non
Non	Cla001322	Receptor-like	0.375	0.97	0.447	1	0.1	1	0.2	Non	Non	Non
Non	Cla001323	Receptor-like	0.969	0.97	0.969	1	1	1	1	Non	Non	Non
Non	Cla001324	Receptor-like	0.99	0.376	0.407	0.1	0.1	1	1	Non	Non	Non
Non	Cla001325	Cysteine-rich	0.969	0.97	0.969	1	1	1	1	Non	Non	Non
Non	Cla001327	Unknown	0.973	0.759	0.638	0.9	1	0.5	0.4	Non	Non	Non
Non	Cla001328	Os04g0690100	0.817	0.979	0.895	0.5	0.8	0.5	0.4	Non	Non	Non
Sig4	Cla001329	Lateral	0.775	0.132	0.029	17.4	20.2	26.2	34.6	Non	Non	Sig
Non	Cla001330	Pentatricopeptide	0.86	0.979	0.86	1.2	1	1.1	1	Non	Non	Non
Non	Cla001331	BHLH	0.813	0.626	0.064	10	9.5	11.7	21.2	Non	Non	Non
Non	Cla001332	Flavoprotein	0.737	0.085	0.124	8.5	7.6	2.5	3.5	Non	Non	Non
Non	Cla001334	Receptor	0.774	0.216	0.152	8	9.7	3.5	15.6	Non	Non	Non
Non	Cla001335	Zinc	0.902	0.791	0.794	0.7	0.9	1	1.1	Non	Non	Non
Non	Cla001336	Uncharacterized	0.892	0.937	0.464	7.8	7.7	7.1	5.5	Non	Non	Non
Non	Cla001338	Equilibrative	0.386	0.784	0.962	1.5	3.6	1	1.5	Non	Non	Non
Non	Cla001339	B160	0.738	0.524	0.533	8.6	10.6	10.9	12	Non	Non	Non
Non	Cla001340	Uncharacterized	0.877	0.373	0.621	6.2	6	9.3	8.5	Non	Non	Non
Non	Cla001341	MYB	0.737	0.149	0.226	0.2	0.5	2.5	2.1	Non	Non	Non
Non	Cla001342	3&apos(2&apos)	0.765	0.497	0.206	6.9	8.5	9.2	13.1	Non	Non	Non
Non	Cla001343	Unknown	0.99	0.991	0.023	0.1	0.1	0.1	5.8	Non	Non	Non
Non	Cla001344	Unknown	0.877	0.816	0.418	6.8	7.8	7.3	4.4	Non	Non	Non
Sig4	Cla001346	Membrane	0.091	0.718	0.018	29.3	18.9	25.2	53.1	Non	Non	Sig
Non	Cla001347	Auxin	0.126	0.066	0.061	19.6	11.9	9	10.2	Non	Non	Non
Non	Cla001348	Unknown	0.879	0.62	0.591	0.5	0.7	0.1	0.1	Non	Non	Non
Non	Cla001352	Unknown	0.969	0.406	0.969	1	1	0.1	1	Non	Non	Non
Non	Cla001353	Unknown	0.843	0.873	0.673	0.2	0.1	0.3	0.6	Non	Non	Non
Non	Cla001354	Unknown	0.843	0.987	0.567	0.2	0.1	0.2	0.8	Non	Non	Non
Non	Cla001355	NADH	0.969	0.97	0.658	1	1	1	0.5	Non	Non	Non
Non	Cla001356	Nuclease	0.921	0.809	0.897	4.8	5.4	5.3	5.5	Non	Non	Non
Non	Cla001357	Quinone	0.407	0.376	0.99	0.1	1	1	0.1	Non	Non	Non
Non	Cla001359	Pre-mRNA-splicing	0.767	0.323	0.462	3.7	4.8	6.6	6.3	Non	Non	Non
Non	Cla001360	Unknown	0.983	0.764	0.872	0.3	0.3	0.1	0.2	Non	Non	Non
Non	Cla001361	Unknown	0.902	0.796	0.974	0.7	0.9	0.4	0.7	Non	Non	Non
Non	Cla001362	Pre-mRNA-splicing	0.715	0.186	0.269	7	8.9	12.3	12.4	Non	Non	Non
Non	Cla001365	Unknown	0.969	0.97	0.969	1	1	1	1	Non	Non	Non
Non	Cla001366	B3	0.918	0.198	0.33	6.9	7.7	12	11.6	Non	Non	Non
Non	Cla001367	B3	0.535	0.074	0.172	8.2	11.5	16.4	15.5	Non	Non	Non
Non	Cla001368	Anaphase	0.69	0.893	0.987	4.4	3.5	3.8	4.6	Non	Non	Non
Non	Cla001369	Receptor-like	0.779	0.438	0.074	8.2	9.9	11.1	18.1	Non	Non	Non
Non	Cla001370	Unknown	0.661	0.62	0.591	0.5	1.1	0.1	0.1	Non	Non	Non
Non	Cla001371	Unknown	0.336	0.164	0.162	2.6	0.9	0.2	0.3	Non	Non	Non
Non	Cla001373	Dof	0.908	0.653	0.613	0.8	0.7	0.3	0.3	Non	Non	Non
Non	Cla001374	Unknown	0.969	0.97	0.969	1	1	1	1	Non	Non	Non
Non	Cla001375	Unknown	0.969	0.97	0.969	1	1	1	1	Non	Non	Non
Non	Cla001376	Unknown	0.969	0.97	0.969	1	1	1	1	Non	Non	Non
Non	Cla001377	Unknown	0.798	0.917	0.737	1.1	0.8	0.9	0.7	Non	Non	Non
Non	Cla001378	ATP	0.869	0.986	0.904	8.4	9.6	7.9	9.4	Non	Non	Non
Non	Cla001380	Zinc	0.969	0.97	0.969	1	1	1	1	Non	Non	Non
Non	Cla001381	(RAP	0.744	0.837	0.781	6.1	7.7	6.5	7.5	Non	Non	Non
Non	Cla001382	Unknown	0.737	0.866	0.986	0.2	0.5	0.1	0.2	Non	Non	Non
Non	Cla001383	Unknown	0.375	0.97	0.969	1	0.1	1	1	Non	Non	Non
Non	Cla001384	Unknown	0.969	0.97	0.969	1	1	1	1	Non	Non	Non
Non	Cla001385	Phi-1	0.969	0.97	0.969	1	1	1	1	Non	Non	Non
Non	Cla001386	Unknown	0.969	0.97	0.969	1	1	1	1	Non	Non	Non
Non	Cla001387	Phi-1	0.969	0.97	0.969	1	1	1	1	Non	Non	Non
Non	Cla001388	Unknown	0.969	0.97	0.969	1	1	1	1	Non	Non	Non
Non	Cla001389	Protein	0.754	0.133	0.333	5.8	7.3	11.6	10.1	Non	Non	Non
Non	Cla001390	Unknown	0.863	0.812	0.937	0.4	0.6	0.2	0.5	Non	Non	Non
Non	Cla001391	Protein	0.506	0.088	0.195	9	12.7	17	16.2	Non	Non	Non
Non	Cla001392	Dirigent-like	0.843	0.78	0.813	0.2	0.1	0.4	0.4	Non	Non	Non
Non	Cla001393	Unknown	0.969	0.97	0.969	1	1	1	1	Non	Non	Non
Non	Cla001394	Unknown	0.969	0.97	0.969	1	1	1	1	Non	Non	Non
Non	Cla001395	Unknown	0.856	0.513	0.679	1.1	0.9	2.2	1.9	Non	Non	Non
Non	Cla001396	Dirigent-like	0.407	0.376	0.99	0.1	1	1	0.1	Non	Non	Non
Non	Cla001397	Unknown	0.969	0.97	0.969	1	1	1	1	Non	Non	Non
Non	Cla001398	Pentatricopeptide	0.87	0.896	0.775	1.6	1.4	1.3	1.2	Non	Non	Non
Non	Cla001399	Transcriptional	0.969	0.97	0.969	1	1	1	1	Non	Non	Non
Non	Cla001400	F-box	0.785	0.97	0.912	1	1.5	1	0.9	Non	Non	Non
Non	Cla001401	Retrotransposon	0.969	0.97	0.969	1	1	1	1	Non	Non	Non
Sig4	Cla001402	Vacuolar	0.837	0.109	0.04	13.4	15.3	22	27.7	Non	Non	Sig
Sig4	Cla001403	Dual	0.952	0.405	0.036	6.5	7.1	9.4	17.4	Non	Non	Sig
Non	Cla001406	Unknown	0.895	0.712	0.576	0.5	0.4	0.9	1.3	Non	Non	Non
Non	Cla001407	Signal	0.517	0.178	0.4	30.1	37.3	39.5	39	Non	Non	Non
Non	Cla001408	Glucan	0.977	0.559	0.518	1	1.1	0.3	0.3	Non	Non	Non
Non	Cla001411	Thymidine	0.84	0.566	0.76	0.8	0.6	0.2	1.3	Non	Non	Non
Non	Cla001412	RNA-binding	0.519	0.452	0.482	7.8	5.8	4.8	5.6	Non	Non	Non
Non	Cla001413	Unknown	0.969	0.97	0.375	1	1	1	0.1	Non	Non	Non
Non	Cla001414	Thioredoxin	0.978	0.126	0.346	8.4	9	15.2	13.4	Non	Non	Non
Non	Cla001415	Unknown	0.969	0.97	0.969	1	1	1	1	Non	Non	Non
Non	Cla001416	Poly(ADP-ribose)	0.978	0.712	0.708	0.5	0.5	0.9	1	Non	Non	Non
Non	Cla001417	Poly(ADP-ribose)	0.962	0.975	0.658	0.7	0.8	0.7	1.4	Non	Non	Non
Non	Cla001418	Unknown	0.79	0.477	0.551	4.3	5.4	2.3	2.9	Non	Non	Non
Non	Cla001419	Unknown	0.506	0.828	0.815	1.4	2.9	1	1.1	Non	Non	Non
Non	Cla001420	Unknown	0.903	0.866	0.813	0.2	0.3	0.1	0.4	Non	Non	Non
Non	Cla001421	Ulp1	0.969	0.634	0.375	1	1	0.4	0.1	Non	Non	Non
Non	Cla001422	Unknown	0.969	0.97	0.969	1	1	1	1	Non	Non	Non
Non	Cla001423	Unknown	0.937	0.685	0.635	0.4	0.5	0.1	1	Non	Non	Non
Non	Cla001424	Unknown	0.843	0.448	0.843	0.2	0.1	1	0.1	Non	Non	Non
Non	Cla001425	Unknown	0.969	0.97	0.969	1	1	1	1	Non	Non	Non
Non	Cla001426	Unknown	0.407	0.376	0.99	0.1	1	1	0.1	Non	Non	Non
Non	Cla001427	Unknown	0.969	0.97	0.969	1	1	1	1	Non	Non	Non
Non	Cla001428	Unknown	0.969	0.97	0.969	1	1	1	1	Non	Non	Non
Non	Cla001429	Unknown	0.955	0.565	0.732	0.6	0.7	0.1	0.3	Non	Non	Non
Non	Cla001430	Unknown	0.969	0.97	0.969	1	1	1	1	Non	Non	Non
Non	Cla001431	Alcohol	0.969	0.97	0.969	1	1	1	1	Non	Non	Non
Non	Cla001432	Cysteine-rich	0.99	0.844	0.99	0.1	0.1	0.2	0.1	Non	Non	Non
Non	Cla001433	Unknown	0.969	0.97	0.969	1	1	1	1	Non	Non	Non
Sig3	Cla001435	Alcohol	0.879	0.025	0.065	2.5	2.3	10.1	9.1	Non	Sig	Non
Non	Cla001436	Unknown	0.969	0.97	0.969	1	1	1	1	Non	Non	Non
Non	Cla001437	Unknown	0.969	0.97	0.375	1	1	1	0.1	Non	Non	Non
Non	Cla001438	Unknown	0.969	0.97	0.969	1	1	1	1	Non	Non	Non
Non	Cla001439	Phloem	0.612	0.798	0.285	20.5	25.2	17.9	15.1	Non	Non	Non
Sig3.4	Cla001440	Phloem	0.139	0.014	0.015	58.5	46.3	32.7	37.3	Non	Sig	Sig
Non	Cla001441	Polygalacturonase	0.969	0.97	0.969	1	1	1	1	Non	Non	Non
Sig4	Cla001442	Cysteine	0.625	0.36	0.029	50.1	48	39.1	32.5	Non	Non	Sig
Non	Cla001443	Unknown	0.969	0.97	0.969	1	1	1	1	Non	Non	Non
Non	Cla001444	MYB	0.969	0.97	0.969	1	1	1	1	Non	Non	Non
Non	Cla001445	Os02g0504100	0.969	0.97	0.375	1	1	1	0.1	Non	Non	Non
Non	Cla001446	Unknown	0.969	0.97	0.375	1	1	1	0.1	Non	Non	Non
Non	Cla001447	CACTA	0.969	0.97	0.969	1	1	1	1	Non	Non	Non
Non	Cla001448	Os02g0504100	0.945	0.98	0.443	3.1	3.1	3	5.6	Non	Non	Non
Non	Cla001449	Unknown	0.969	0.97	0.969	1	1	1	1	Non	Non	Non
Non	Cla001450	Unknown	0.969	0.97	0.969	1	1	1	1	Non	Non	Non
Non	Cla001451	Unknown	0.969	0.97	0.969	1	1	1	1	Non	Non	Non
Non	Cla001452	Unknown	0.969	0.97	0.969	1	1	1	1	Non	Non	Non
Non	Cla001453	Unknown	0.99	0.991	0.99	0.1	0.1	0.1	0.1	Non	Non	Non
Non	Cla001454	Acetyl-CoA	0.816	0.566	0.521	14.8	17	17.2	19.5	Non	Non	Non
Non	Cla001455	Acetyl-CoA	0.929	0.795	0.563	18.5	19	19.1	23.4	Non	Non	Non
Non	Cla001456	Tyrosyl-tRNA	0.678	0.559	0.663	6.9	9	8.8	5.7	Non	Non	Non
Non	Cla001457	Tyrosyl-tRNA	0.708	0.859	0.855	5	6.6	5.3	4.7	Non	Non	Non
Non	Cla001458	Unknown	0.375	0.559	0.518	1	0.1	0.3	0.3	Non	Non	Non
Non	Cla001459	Pentatricopeptide	0.615	0.846	0.64	2.3	3.7	2.6	3.6	Non	Non	Non
Non	Cla001460	Unknown	0.843	0.866	0.843	0.2	0.1	0.1	0.1	Non	Non	Non
Non	Cla001461	Unknown	0.528	0.558	0.636	1.6	3.1	2.7	2.7	Non	Non	Non
Non	Cla001462	Unknown	0.969	0.97	0.969	1	1	1	1	Non	Non	Non
Non	Cla001463	SET	0.915	0.604	0.747	1.4	1.3	2.3	2.1	Non	Non	Non
Non	Cla001464	Ty3-gypsy	0.99	0.376	0.99	0.1	0.1	1	0.1	Non	Non	Non
Non	Cla001465	Unknown	0.96	0.684	0.579	1.6	1.6	2.3	2.9	Non	Non	Non
Non	Cla001466	Unknown	0.718	0.831	0.792	1.5	1	1.8	2.1	Non	Non	Non
Non	Cla001467	Unknown	0.969	0.97	0.969	1	1	1	1	Non	Non	Non
Non	Cla001468	Zinc	0.923	0.887	0.709	0.3	0.4	0.4	0.7	Non	Non	Non
Sig2	Cla001469	Phosphorylase	7.3e-12	0.00304	0.605	72	190.2	106.9	82.7	Sig	Non	Non
Non	Cla001470	Ribosomal	0.938	0.743	0.607	2.2	2.5	2.8	3.6	Non	Non	Non
Non	Cla001471	Unknown	0.969	0.97	0.969	1	1	1	1	Non	Non	Non
Non	Cla001472	Ty3-gypsy	0.969	0.406	0.375	1	1	0.1	0.1	Non	Non	Non
Non	Cla001473	Unknown	0.969	0.97	0.969	1	1	1	1	Non	Non	Non
Non	Cla001474	Unknown	0.962	0.954	0.962	0.7	0.8	0.6	0.8	Non	Non	Non
Non	Cla001475	Mitochondrial	0.494	0.458	0.474	25.8	22.4	19.6	32.9	Non	Non	Non
Non	Cla001476	Acetyl-CoA	0.689	0.341	0.767	4	5.5	1.6	3.4	Non	Non	Non
Non	Cla001477	Sister	0.668	0.745	0.332	17.1	20.8	18.1	24.5	Non	Non	Non
Non	Cla001478	Unknown	0.797	0.922	0.887	0.4	0.7	0.3	0.3	Non	Non	Non
Non	Cla001479	Cohesin	0.735	0.792	0.51	3	4.1	3.5	5.1	Non	Non	Non
Non	Cla001480	Sh4	0.623	0.417	0.067	1.2	2.2	2.7	6.5	Non	Non	Non
Non	Cla001481	Receptor-like	0.775	0.313	0.28	1.6	1.2	0.2	0.2	Non	Non	Non
Sig2.3	Cla001482	Light	0.000188	0	0.236	83.1	44.5	266.3	104.5	Sig	Sig	Non
Non	Cla001483	Unknown	0.977	0.071	0.829	1	1.1	5.4	1.4	Non	Non	Non
Non	Cla001484	Chromosome	0.907	0.175	0.191	7.4	8.3	2.8	3.4	Non	Non	Non
Non	Cla001485	RNA	0.477	0.247	0.132	26.5	33.7	33.9	40.7	Non	Non	Non
Non	Cla001486	Unknown	0.98	0.896	0.863	0.4	0.4	0.5	0.6	Non	Non	Non
Non	Cla001487	Protein	0.842	0.805	0.419	0.3	0.5	0.5	1.4	Non	Non	Non
Non	Cla001488	Major	0.903	0.743	0.632	2.2	2.6	2.8	3.5	Non	Non	Non
Non	Cla001490	Receptor-like	0.969	0.97	0.969	1	1	1	1	Non	Non	Non
Non	Cla001492	Hydroxyproline-rich	0.738	0.217	0.075	13.9	16.6	20.2	26.3	Non	Non	Non
Non	Cla001494	Unknown	0.974	0.644	0.547	0.7	0.7	1.3	1.7	Non	Non	Non
Non	Cla001496	Bidirectional	0.969	0.97	0.969	1	1	1	1	Non	Non	Non
Non	Cla001498	Glutaredoxin	0.407	0.376	0.407	0.1	1	1	1	Non	Non	Non
Non	Cla001499	Pollen	0.962	0.878	0.669	0.7	0.8	0.5	0.3	Non	Non	Non
Sig4	Cla001500	SAUR-like	0.49	0.161	0.017	4.9	7.7	9.9	16.6	Non	Non	Sig
Non	Cla001501	GYF	0.2	0.884	0.626	63	82.5	58.2	72.4	Non	Non	Non
Sig3.4	Cla001502	Peptidyl-prolyl	0.47	0.000927	2.36e-11	66.2	61.6	31	10	Non	Sig	Sig
Sig3.4	Cla001503	ACT	0.541	0.000544	0.000179	20.3	17.6	3	2.9	Non	Sig	Sig
Sig3	Cla001504	U-box	0.352	0.00802	0.161	11.1	7.6	1.4	5.8	Non	Sig	Non
Sig3.4	Cla001505	Ferric	0.096	7.3e-06	6.92e-05	35.6	24.4	5.7	10	Non	Sig	Sig
Non	Cla001506	Transcription	0.907	0.306	0.384	17.1	18.8	22.5	23.8	Non	Non	Non
Non	Cla001507	Unknown	0.375	0.406	0.969	1	0.1	0.1	1	Non	Non	Non
Non	Cla001508	Heavy-metal-associated	0.969	0.97	0.969	1	1	1	1	Non	Non	Non
Non	Cla001509	Unknown	0.765	0.991	0.99	0.1	0.3	0.1	0.1	Non	Non	Non
Non	Cla001510	DM280	0.407	0.19	0.087	0.1	1	1.9	3.4	Non	Non	Non
Non	Cla001511	Unknown	0.795	0.22	0.492	9.4	8.8	14.8	13.3	Non	Non	Non
Non	Cla001512	Proton	0.534	0.394	0.285	1.2	2.5	2.8	3.7	Non	Non	Non
Non	Cla001513	Unknown	0.351	0.19	0.02	8	5	3.3	1.2	Non	Non	Non
Non	Cla001515	Unknown	0.969	0.97	0.969	1	1	1	1	Non	Non	Non
Non	Cla001516	Fcf2	0.981	0.321	0.305	1.1	1.2	3	3.4	Non	Non	Non
Non	Cla001517	BZIP	0.961	0.484	0.462	4.3	4.4	6.3	7.1	Non	Non	Non
Non	Cla001518	DNA	0.775	0.794	0.764	1.6	1.2	2	2.3	Non	Non	Non
Non	Cla001519	Squamosa	0.876	0.765	0.79	1	1.3	1.4	0.7	Non	Non	Non
Non	Cla001520	Unknown	0.969	0.97	0.969	1	1	1	1	Non	Non	Non
Non	Cla001521	Unknown	0.969	0.97	0.969	1	1	1	1	Non	Non	Non
Non	Cla001522	Unknown	0.969	0.97	0.375	1	1	1	0.1	Non	Non	Non
Non	Cla001523	Unknown	0.447	0.406	0.375	1	0.2	0.1	0.1	Non	Non	Non
Sig3	Cla001524	cDNA	0.68	0.016	0.064	6.4	8.4	17.6	15.7	Non	Sig	Non
Non	Cla001525	Unknown	0.407	0.376	0.99	0.1	1	1	0.1	Non	Non	Non
Non	Cla001526	Unknown	0.969	0.97	0.969	1	1	1	1	Non	Non	Non
Non	Cla001527	Unknown	0.969	0.97	0.969	1	1	1	1	Non	Non	Non
Non	Cla001528	Unknown	0.969	0.97	0.375	1	1	1	0.1	Non	Non	Non
Non	Cla001529	Unknown	0.969	0.97	0.969	1	1	1	1	Non	Non	Non
Sig4	Cla001530	Sec1-4	0.333	0.162	0.012	5.5	9.7	10.7	18.4	Non	Non	Sig
Non	Cla001531	Protein	0.558	0.258	0.073	4.2	6.4	7.8	11.8	Non	Non	Non
Non	Cla001532	Reverse	0.867	0.991	0.99	0.1	0.2	0.1	0.1	Non	Non	Non
Non	Cla001533	Unknown	0.969	0.97	0.969	1	1	1	1	Non	Non	Non
Non	Cla001534	MtN21	0.969	0.483	0.658	1	1	0.2	0.5	Non	Non	Non
Non	Cla001535	Unknown	0.903	0.866	0.903	0.2	0.3	0.1	0.3	Non	Non	Non
Non	Cla001536	Unknown	0.407	0.376	0.99	0.1	1	1	0.1	Non	Non	Non
Non	Cla001537	Unknown	0.969	0.97	0.969	1	1	1	1	Non	Non	Non
Non	Cla001539	Unknown	0.969	0.97	0.969	1	1	1	1	Non	Non	Non
Non	Cla001540	Neuroblastoma-amplified	0.567	0.825	0.847	22	27.4	22.3	24.6	Non	Non	Non
Non	Cla001541	Neuroblastoma-amplified	0.853	0.836	0.638	5.7	6.7	6.1	7.8	Non	Non	Non
Non	Cla001542	Cytoplasmic	0.611	0.856	0.947	3.7	5.5	4	4.1	Non	Non	Non
Non	Cla001543	Cytoplasmic	0.843	0.783	0.683	5.3	6.3	4.2	4.3	Non	Non	Non
Non	Cla001544	Unknown	0.916	0.804	0.637	1.7	1.6	1.2	1	Non	Non	Non
Non	Cla001545	Unknown	0.8	0.794	0.627	1.6	2.2	1.1	0.9	Non	Non	Non
Non	Cla001546	Cytoplasmic	0.665	0.823	0.931	4.9	6.7	4	4.9	Non	Non	Non
Non	Cla001547	Unknown	0.969	0.97	0.969	1	1	1	1	Non	Non	Non
Non	Cla001548	Plastid	0.676	0.112	0.817	5.2	7	11.2	6.3	Non	Non	Non
Non	Cla001549	Plastid	0.868	0.668	0.91	0.9	1.2	1.5	0.8	Non	Non	Non
Non	Cla001550	Unknown	0.843	0.866	0.843	0.2	0.1	0.1	0.1	Non	Non	Non
Non	Cla001551	Pentatricopeptide	0.752	0.37	0.73	5.1	6.5	8	4.3	Non	Non	Non
Non	Cla001552	Unknown	0.969	0.97	0.969	1	1	1	1	Non	Non	Non
Non	Cla001553	Unknown	0.969	0.97	0.969	1	1	1	1	Non	Non	Non
Non	Cla001554	Receptor	0.447	0.476	0.422	0.8	2.2	1.9	2.3	Non	Non	Non
Non	Cla001555	Unknown	0.969	0.97	0.969	1	1	1	1	Non	Non	Non
Non	Cla001556	U11/U12	0.529	0.446	0.99	13.5	17.9	16.9	14.2	Non	Non	Non
Non	Cla001557	Unknown	0.833	0.906	0.955	0.6	0.9	0.7	0.7	Non	Non	Non
Non	Cla001558	Germin-like	0.969	0.97	0.969	1	1	1	1	Non	Non	Non
Non	Cla001559	Unknown	0.969	0.97	0.969	1	1	1	1	Non	Non	Non
Non	Cla001560	Unknown	0.969	0.97	0.969	1	1	1	1	Non	Non	Non
Non	Cla001561	Unknown	0.969	0.97	0.969	1	1	1	1	Non	Non	Non
Non	Cla001562	Unknown	0.937	0.896	0.78	0.4	0.5	0.5	0.2	Non	Non	Non
Non	Cla001563	Unknown	0.969	0.97	0.969	1	1	1	1	Non	Non	Non
Non	Cla001564	Unknown	0.97	0.901	0.638	0.9	0.9	0.7	0.4	Non	Non	Non
Non	Cla001565	Circadian	0.693	0.779	0.535	4.1	5.6	4.7	6.4	Non	Non	Non
Non	Cla001566	Unknown	0.969	0.406	0.518	1	1	0.1	0.3	Non	Non	Non
Non	Cla001567	Unknown	0.99	0.376	0.407	0.1	0.1	1	1	Non	Non	Non
Non	Cla001568	Unknown	0.969	0.97	0.969	1	1	1	1	Non	Non	Non
Non	Cla001569	Unknown	0.843	0.448	0.843	0.2	0.1	1	0.1	Non	Non	Non
Non	Cla001570	Unknown	0.969	0.97	0.375	1	1	1	0.1	Non	Non	Non
Non	Cla001571	Unknown	0.976	0.51	0.778	0.6	0.6	1.5	1	Non	Non	Non
Non	Cla001572	Ty3-gypsy	0.969	0.97	0.969	1	1	1	1	Non	Non	Non
Non	Cla001573	Unknown	0.969	0.97	0.969	1	1	1	1	Non	Non	Non
Non	Cla001574	Unknown	0.969	0.97	0.969	1	1	1	1	Non	Non	Non
Non	Cla001575	Unknown	0.843	0.866	0.903	0.2	0.1	0.1	0.3	Non	Non	Non
Non	Cla001576	Glycosyltransferase	0.913	0.737	0.161	5.5	6.2	4.2	11.8	Non	Non	Non
Non	Cla001577	Unknown	0.888	0.914	0.209	3.5	4.1	3.6	8.1	Non	Non	Non
Non	Cla001578	Unknown	0.969	0.97	0.969	1	1	1	1	Non	Non	Non
Non	Cla001579	Unknown	0.911	0.419	0.76	0.8	1	2.1	1.3	Non	Non	Non
Non	Cla001580	Unknown	0.969	0.97	0.969	1	1	1	1	Non	Non	Non
Non	Cla001581	Unknown	0.851	0.952	0.813	7.4	8.6	6.8	6.9	Non	Non	Non
Non	Cla001582	Unknown	0.686	0.844	0.765	0.1	0.4	0.2	0.3	Non	Non	Non
Non	Cla001583	Receptor-like	0.375	0.406	0.447	1	0.1	0.1	0.2	Non	Non	Non
Non	Cla001584	Unknown	0.969	0.97	0.969	1	1	1	1	Non	Non	Non
Non	Cla001585	Ras-related	0.375	0.97	0.375	1	0.1	1	0.1	Non	Non	Non
Non	Cla001586	Rac-like	0.987	0.284	0.245	2.4	2.5	0.5	0.5	Non	Non	Non
Non	Cla001587	LOB	0.969	0.97	0.969	1	1	1	1	Non	Non	Non
Non	Cla001588	Core-2/I-branching	0.969	0.97	0.969	1	1	1	1	Non	Non	Non
Non	Cla001589	Unknown	0.969	0.97	0.969	1	1	1	1	Non	Non	Non
Non	Cla001590	Acid	0.679	0.872	0.615	1.4	2.3	1.6	2.5	Non	Non	Non
Non	Cla001591	Acid	0.855	0.767	0.786	1.9	2.4	2.4	2.6	Non	Non	Non
Non	Cla001592	Unknown	0.969	0.97	0.969	1	1	1	1	Non	Non	Non
Non	Cla001593	Early-responsive	0.459	0.714	0.958	1.8	0.7	1.1	1.8	Non	Non	Non
Non	Cla001594	Gag-protease	0.375	0.97	0.375	1	0.1	1	0.1	Non	Non	Non
Sig3	Cla001595	Nsfl1	0.721	0.047	0.071	11.4	13.9	22	22.9	Non	Sig	Non
Non	Cla001596	RNA	0.976	0.586	0.833	0.6	0.6	1.3	0.9	Non	Non	Non
Non	Cla001597	Envelope-like	0.969	0.97	0.969	1	1	1	1	Non	Non	Non
Non	Cla001598	Unknown	0.969	0.406	0.969	1	1	0.1	1	Non	Non	Non
Non	Cla001599	Unknown	0.969	0.97	0.969	1	1	1	1	Non	Non	Non
Non	Cla001600	Unknown	0.774	0.913	0.563	0.9	1.4	1	0.3	Non	Non	Non
Non	Cla001601	Unknown	0.986	0.866	0.843	0.2	0.2	0.1	0.1	Non	Non	Non
Non	Cla001602	Unknown	0.969	0.97	0.969	1	1	1	1	Non	Non	Non
Non	Cla001603	Endo-1	0.937	0.777	0.442	1.2	1.4	1.6	0.3	Non	Non	Non
Sig4	Cla001604	NADH	0.627	0.125	0.036	32.7	38.8	44.1	54.7	Non	Non	Sig
Sig3	Cla001605	ADP-RIBOSYLATION	0.938	0.036	0.294	25.7	26.6	41.1	35.6	Non	Sig	Non
Non	Cla001606	Unknown	0.867	0.844	0.867	0.1	0.2	0.2	0.2	Non	Non	Non
Non	Cla001607	Unknown	0.969	0.97	0.969	1	1	1	1	Non	Non	Non
Non	Cla001608	LIM	0.407	0.376	0.99	0.1	1	1	0.1	Non	Non	Non
Non	Cla001609	Myosin	0.88	0.553	0.379	4.1	4.8	5.7	7.4	Non	Non	Non
Non	Cla001610	Unknown	0.59	0.62	0.804	0.5	0.1	0.1	0.3	Non	Non	Non
Non	Cla001612	Unknown	0.99	0.739	0.867	0.1	0.1	0.3	0.2	Non	Non	Non
Non	Cla001613	Ribosomal	0.988	0.702	0.897	1.3	1.4	1.9	1.6	Non	Non	Non
Non	Cla001614	Unknown	0.741	0.116	0.251	5.4	6.9	11.4	10.4	Non	Non	Non
Non	Cla001615	Tubulin	0.667	0.989	0.562	1.5	0.9	1.4	0.7	Non	Non	Non
Non	Cla001616	Unknown	0.99	0.376	0.99	0.1	0.1	1	0.1	Non	Non	Non
Non	Cla001617	Protein	0.362	0.891	0.912	36.7	47.4	33.7	37.8	Non	Non	Non
Non	Cla001618	1-phosphatidylinositol	0.378	0.663	0.664	8.8	13.6	10.2	11.3	Non	Non	Non
Non	Cla001619	Phosphatidylinositol	0.135	0.354	0.448	45.9	64.7	52.5	56.4	Non	Non	Non
Non	Cla001620	Isoflavone	0.983	0.887	0.021	0.3	0.3	0.4	6.5	Non	Non	Non
Non	Cla001621	Pathogenesis-related	0.377	0.844	0.99	0.1	1.1	0.2	0.1	Non	Non	Non
Non	Cla001622	Unknown	0.969	0.97	0.969	1	1	1	1	Non	Non	Non
Non	Cla001623	Pathogenesis-related	0.969	0.97	0.375	1	1	1	0.1	Non	Non	Non
Non	Cla001624	Pathogenesis-related	0.407	0.376	0.407	0.1	1	1	1	Non	Non	Non
Non	Cla001625	Pathogenesis	0.969	0.97	0.969	1	1	1	1	Non	Non	Non
Non	Cla001626	Pathogenesis	0.969	0.97	0.969	1	1	1	1	Non	Non	Non
Non	Cla001627	Pathogenesis	0.969	0.97	0.969	1	1	1	1	Non	Non	Non
Non	Cla001628	Pathogenesis-related	0.566	0.924	0.86	1.2	0.5	1	1	Non	Non	Non
Non	Cla001629	Pathogenesis-related	0.983	0.887	0.739	0.3	0.3	0.4	0.1	Non	Non	Non
Non	Cla001630	Pathogenesis-related	0.99	0.991	0.407	0.1	0.1	0.1	1	Non	Non	Non
Non	Cla001631	Pathogenesis-related	0.969	0.97	0.969	1	1	1	1	Non	Non	Non
Non	Cla001632	Unknown	0.969	0.97	0.969	1	1	1	1	Non	Non	Non
Non	Cla001633	RAR1	0.898	0.917	0.988	1.3	1.6	1.4	1.4	Non	Non	Non
Non	Cla001634	Unknown	0.969	0.97	0.969	1	1	1	1	Non	Non	Non
Non	Cla001635	Unknown	0.969	0.97	0.969	1	1	1	1	Non	Non	Non
Non	Cla001636	Unknown	0.969	0.97	0.969	1	1	1	1	Non	Non	Non
Non	Cla001637	Unknown	0.99	0.991	0.99	0.1	0.1	0.1	0.1	Non	Non	Non
Non	Cla001638	Pentatricopeptide	0.71	0.857	0.825	4	5.4	4.3	3.6	Non	Non	Non
Non	Cla001639	Gag/pol	0.99	0.376	0.99	0.1	0.1	1	0.1	Non	Non	Non
Non	Cla001641	Unknown	0.969	0.97	0.969	1	1	1	1	Non	Non	Non
Non	Cla001642	Unknown	0.969	0.97	0.969	1	1	1	1	Non	Non	Non
Non	Cla001643	Predicted	0.731	0.693	0.56	6.3	8	7.4	9	Non	Non	Non
Non	Cla001644	E3	0.774	0.986	0.83	2.7	2.2	2.6	3.4	Non	Non	Non
Non	Cla001645	Unknown	0.899	0.918	0.899	2.1	2.5	2.2	2.5	Non	Non	Non
Non	Cla001646	Unknown	0.842	0.984	0.842	0.3	0.5	0.3	0.5	Non	Non	Non
Non	Cla001647	Uncharacterized	0.963	0.728	0.441	5.8	6.3	6.7	9.2	Non	Non	Non
Non	Cla001648	Unknown	0.969	0.97	0.375	1	1	1	0.1	Non	Non	Non
Non	Cla001649	Ty3-gypsy	0.407	0.376	0.407	0.1	1	1	1	Non	Non	Non
Non	Cla001650	Unknown	0.973	0.913	0.972	0.9	1	1	1	Non	Non	Non
Non	Cla001651	Response	0.66	0.208	0.083	4.3	3.3	1.2	0.6	Non	Non	Non
Non	Cla001652	BHLH	0.969	0.97	0.969	1	1	1	1	Non	Non	Non
Non	Cla001653	BHLH	0.901	0.727	0.955	0.6	0.5	1	0.7	Non	Non	Non
Non	Cla001654	BHLH	0.969	0.97	0.969	1	1	1	1	Non	Non	Non
Non	Cla001655	Unknown	0.969	0.97	0.969	1	1	1	1	Non	Non	Non
Non	Cla001656	Unknown	0.969	0.97	0.969	1	1	1	1	Non	Non	Non
Non	Cla001657	Xenotropic	0.644	0.85	0.607	5.8	4.6	4.9	8.1	Non	Non	Non
Non	Cla001658	Unknown	0.969	0.97	0.969	1	1	1	1	Non	Non	Non
Sig3.4	Cla001659	Proline-rich	0.227	0.00668	0.012	11.7	7	1.5	2.6	Non	Sig	Sig
Non	Cla001660	Translocon-associated	0.968	0.266	0.276	2	2.2	4.7	5.1	Non	Non	Non
Non	Cla001661	Unknown	0.969	0.97	0.969	1	1	1	1	Non	Non	Non
Non	Cla001662	Protein	0.854	0.247	0.361	4.8	4.5	8.7	8.5	Non	Non	Non
Non	Cla001663	Transcription	0.996	0.735	0.615	6.6	7	7.5	5.2	Non	Non	Non
Sig3.4	Cla001664	Triosephosphate	0.06	0.021	4.16e-08	104.1	83.6	69.2	41.9	Non	Sig	Sig
Non	Cla001665	Unknown	0.842	0.764	0.739	0.3	0.5	0.1	0.1	Non	Non	Non
Non	Cla001666	Unknown	0.435	0.302	0.361	3.5	6.2	6.5	6.7	Non	Non	Non
Non	Cla001667	Chromosome	0.885	0.196	0.451	9.6	9.5	15.4	13.9	Non	Non	Non
Sig4	Cla001668	ER	0.576	0.111	0.034	5.4	7.8	11.5	15.7	Non	Non	Sig
Non	Cla001669	Unknown	0.969	0.97	0.969	1	1	1	1	Non	Non	Non
Non	Cla001670	Aquaporin	0.969	0.97	0.969	1	1	1	1	Non	Non	Non
Sig4	Cla001671	Uncharacterized	0.313	0.424	0.015	4.5	8.5	6.9	16.1	Non	Non	Sig
Non	Cla001672	Equilibrative	0.673	0.196	0.165	0.2	0.6	2.1	2.6	Non	Non	Non
Non	Cla001673	Unknown	0.872	0.764	0.56	0.3	0.2	0.1	1	Non	Non	Non
Non	Cla001674	Cyclin	0.688	0.422	0.28	4.3	3.4	2.1	1.8	Non	Non	Non
Non	Cla001675	Unknown	0.969	0.97	0.969	1	1	1	1	Non	Non	Non
Non	Cla001676	CACTA	0.969	0.97	0.969	1	1	1	1	Non	Non	Non
Sig3.4	Cla001677	Translocon-associated	0.99	0.026	0.03	14.4	15.3	27.7	30.1	Non	Sig	Sig
Non	Cla001678	Fatty	0.705	0.195	0.328	2.8	2.1	0.4	1	Non	Non	Non
Non	Cla001679	Fatty	0.956	0.071	0.1	4.8	4.9	0.5	1	Non	Non	Non
Non	Cla001680	Methyltransferase	0.987	0.66	0.292	2.4	2.5	3.3	5.6	Non	Non	Non
Non	Cla001681	Cellulose	0.99	0.991	0.867	0.1	0.1	0.1	0.2	Non	Non	Non
Non	Cla001682	Pentatricopeptide	0.978	0.902	0.947	0.5	0.5	0.6	0.6	Non	Non	Non
Non	Cla001683	Coiled-coil	0.816	0.719	0.7	2.4	3.1	3.1	3.5	Non	Non	Non
Non	Cla001684	Unknown	0.886	0.922	0.657	0.4	0.3	0.3	0.1	Non	Non	Non
Non	Cla001685	Coiled-coil	0.524	0.565	0.238	12.7	17	15	20.4	Non	Non	Non
Non	Cla001686	Unknown	0.98	0.73	0.579	2.8	2.9	3.5	4.5	Non	Non	Non
Non	Cla001687	Unknown	0.407	0.991	0.407	0.1	1	0.1	1	Non	Non	Non
Non	Cla001688	Carboxypeptidase	0.961	0.199	0.7	7.1	7.7	2.8	9.1	Non	Non	Non
Non	Cla001689	Unknown	0.407	0.991	0.99	0.1	1	0.1	0.1	Non	Non	Non
Non	Cla001690	Unknown	0.969	0.97	0.969	1	1	1	1	Non	Non	Non
Non	Cla001691	DNA	0.976	0.642	0.159	6.7	7.2	8.1	13.6	Non	Non	Non
Non	Cla001692	Unknown	0.926	0.601	0.743	1	1.2	1.8	1.6	Non	Non	Non
Non	Cla001693	Unknown	0.518	0.406	0.589	1	0.3	0.1	0.4	Non	Non	Non
Non	Cla001695	Unknown	0.508	0.619	0.332	22.1	28.2	17.9	30.6	Non	Non	Non
Non	Cla001696	Prephenate	0.774	0.759	0.867	0.9	1.4	0.5	1.2	Non	Non	Non
Non	Cla001697	Unknown	0.969	0.97	0.969	1	1	1	1	Non	Non	Non
Non	Cla001698	Unknown	0.375	0.97	0.969	1	0.1	1	1	Non	Non	Non
Non	Cla001699	Type	0.407	0.376	0.407	0.1	1	1	1	Non	Non	Non
Non	Cla001700	Histone-binding	0.775	0.525	0.474	1.6	1.2	0.6	0.6	Non	Non	Non
Non	Cla001701	Unknown	0.738	0.896	0.887	0.4	0.8	0.5	0.3	Non	Non	Non
Non	Cla001702	MYB	0.969	0.97	0.969	1	1	1	1	Non	Non	Non
Non	Cla001703	Remorin	0.997	0.527	0.879	5	5.3	3	5.8	Non	Non	Non
Non	Cla001704	Unknown	0.969	0.97	0.969	1	1	1	1	Non	Non	Non
Non	Cla001705	Unknown	0.969	0.97	0.969	1	1	1	1	Non	Non	Non
Non	Cla001706	Unknown	0.969	0.97	0.969	1	1	1	1	Non	Non	Non
Non	Cla001707	Unknown	0.969	0.97	0.969	1	1	1	1	Non	Non	Non
Non	Cla001708	Lipid	0.693	0.667	0.663	1.9	2.9	2.7	3	Non	Non	Non
Non	Cla001709	Pentatricopeptide	0.679	0.513	0.836	2.1	3.2	3.5	1.8	Non	Non	Non
Non	Cla001710	Pentatricopeptide	0.853	0.729	0.655	4.1	3.8	4.9	3.1	Non	Non	Non
Non	Cla001711	Fertilization-independent	0.973	0.741	0.817	7.6	7.9	8.5	9	Non	Non	Non
Non	Cla001714	Thioredoxin	0.969	0.406	0.162	1	1	0.1	4.4	Non	Non	Non
Sig4	Cla001715	Oxygen	0.982	0.052	5.6e-06	26.6	28.3	13.3	2.8	Non	Non	Sig
Non	Cla001716	Kinesin-like	0.668	0.45	0.149	5	6.8	2.7	1.5	Non	Non	Non
Non	Cla001717	Ty3-gypsy	0.969	0.97	0.969	1	1	1	1	Non	Non	Non
Non	Cla001718	Unknown	0.969	0.97	0.969	1	1	1	1	Non	Non	Non
Non	Cla001719	Formin	0.615	0.369	0.112	4.6	3.4	2.1	11.4	Non	Non	Non
Non	Cla001721	Os04g0690100	0.656	0.418	0.489	1.4	0.8	0.3	0.5	Non	Non	Non
Non	Cla001722	Receptor-like	0.506	0.195	0.059	8.1	6	3.4	2.3	Non	Non	Non
Non	Cla001723	Unknown	0.969	0.97	0.969	1	1	1	1	Non	Non	Non
Non	Cla001725	Unknown	0.969	0.97	0.969	1	1	1	1	Non	Non	Non
Non	Cla001726	Unknown	0.986	0.866	0.903	0.2	0.2	0.1	0.3	Non	Non	Non
Non	Cla001728	Unknown	0.99	0.844	0.99	0.1	0.1	0.2	0.1	Non	Non	Non
Non	Cla001729	Major	0.765	0.739	0.686	0.1	0.3	0.3	0.4	Non	Non	Non
Non	Cla001730	Pentatricopeptide	0.998	0.558	0.699	3.6	3.8	5.1	2.8	Non	Non	Non
Non	Cla001731	Unknown	0.375	0.97	0.375	1	0.1	1	0.1	Non	Non	Non
Non	Cla001732	Xyloglucan	0.57	0.615	0.225	2.9	1.8	1.7	0.7	Non	Non	Non
Non	Cla001733	Ethylene-responsive	0.876	0.72	0.703	1	1.3	1.5	1.7	Non	Non	Non
Non	Cla001734	Unknown	0.402	0.321	0.176	2	0.7	0.4	0.1	Non	Non	Non
Non	Cla001735	F-box	0.923	0.887	0.923	0.3	0.4	0.4	0.4	Non	Non	Non
Non	Cla001737	Malonyl-coenzyme	0.372	0.431	0.07	8.6	13.4	5.3	2.8	Non	Non	Non
Non	Cla001738	Unknown	0.969	0.97	0.969	1	1	1	1	Non	Non	Non
Non	Cla001739	Unknown	0.969	0.97	0.969	1	1	1	1	Non	Non	Non
Non	Cla001740	Unknown	0.969	0.97	0.969	1	1	1	1	Non	Non	Non
Non	Cla001741	Calcium	0.842	0.805	0.654	0.3	0.5	0.5	0.8	Non	Non	Non
Non	Cla001742	Unknown	0.99	0.991	0.407	0.1	0.1	0.1	1	Non	Non	Non
Non	Cla001743	Unknown	0.375	0.97	0.375	1	0.1	1	0.1	Non	Non	Non
Non	Cla001744	Unknown	0.969	0.406	0.969	1	1	0.1	1	Non	Non	Non
Non	Cla001745	Receptor	0.969	0.97	0.375	1	1	1	0.1	Non	Non	Non
Non	Cla001746	Cation/H(+)	0.619	0.736	0.93	2	1.2	1.3	2.3	Non	Non	Non
Non	Cla001747	Unknown	0.867	0.739	0.765	0.1	0.2	0.3	0.3	Non	Non	Non
Non	Cla001748	Cation/H(+)	0.962	0.739	0.054	0.7	0.8	1.1	5.8	Non	Non	Non
Non	Cla001749	Cation/H(+)	0.98	0.59	0.221	0.4	0.4	1	2.6	Non	Non	Non
Non	Cla001750	Unknown	0.969	0.97	0.969	1	1	1	1	Non	Non	Non
Non	Cla001751	Unknown	0.969	0.97	0.969	1	1	1	1	Non	Non	Non
Sig3.4	Cla001752	ATP	2.45e-10	0	0	2334.9	2039.7	1039.8	223.4	Non	Sig	Sig
Non	Cla001753	Ribulose	0.994	0.297	0.146	5.7	6	2.5	1.9	Non	Non	Non
Sig3.4	Cla001754	Ribulose	0.811	0.033	0.00219	20	19.6	8	5.3	Non	Sig	Sig
Non	Cla001755	Unknown	0.991	0.418	0.991	1.4	1.5	0.3	1.5	Non	Non	Non
Non	Cla001756	Unknown	0.847	0.343	0.577	3	2.7	1	1.9	Non	Non	Non
Non	Cla001757	Cation/H(+)	0.87	0.313	0.21	1.6	1.4	0.2	5	Non	Non	Non
Non	Cla001758	Cation/H+	0.566	0.35	0.188	1.2	0.5	0.1	4.5	Non	Non	Non
Non	Cla001759	Unknown	0.518	0.406	0.375	1	0.3	0.1	0.1	Non	Non	Non
Non	Cla001760	Unknown	0.969	0.97	0.969	1	1	1	1	Non	Non	Non
Non	Cla001761	Unknown	0.99	0.376	0.407	0.1	0.1	1	1	Non	Non	Non
Non	Cla001762	Unknown	0.843	0.866	0.843	0.2	0.1	0.1	0.1	Non	Non	Non
Non	Cla001763	Unknown	0.969	0.97	0.969	1	1	1	1	Non	Non	Non
Sig3.4	Cla001764	Chlorophyll	2.51e-07	0	0	609.1	470	241.6	58.6	Non	Sig	Sig
Non	Cla001765	POT	0.732	0.777	0.804	7	8.8	7.7	8.4	Non	Non	Non
Non	Cla001766	Unknown	0.633	0.036	0.212	2.2	3.5	8.9	6	Non	Non	Non
Non	Cla001767	Unknown	0.833	0.906	0.732	0.6	0.9	0.7	0.3	Non	Non	Non
Non	Cla001768	Amino	0.969	0.406	0.375	1	1	0.1	0.1	Non	Non	Non
Non	Cla001769	Heat	0.816	0.194	0.134	3.7	4.6	7.8	9.5	Non	Non	Non
Sig3	Cla001770	Unknown	0.893	0.047	0.168	6.6	7.5	15.3	13.3	Non	Sig	Non
Non	Cla001771	Serine/threonine-protein	0.509	0.697	0.113	12.5	16.9	13.8	22.9	Non	Non	Non
Non	Cla001772	Core-2/I-branching	0.761	0.616	0.675	0.8	1.3	1.5	1.5	Non	Non	Non
Non	Cla001773	Calmodulin	0.791	0.388	0.3	8.8	10.5	5.2	5.3	Non	Non	Non
Non	Cla001774	Unknown	0.99	0.991	0.867	0.1	0.1	0.1	0.2	Non	Non	Non
Non	Cla001775	Rieske	0.885	0.599	0.6	4.3	5	5.7	6.3	Non	Non	Non
Non	Cla001776	Unknown	0.969	0.97	0.969	1	1	1	1	Non	Non	Non
Non	Cla001777	Phosphatidylglycerol/phosphatidylinositol	0.847	0.612	0.626	17.3	19.5	19.4	21.4	Non	Non	Non
Non	Cla001779	Thaumatin-like	0.969	0.97	0.969	1	1	1	1	Non	Non	Non
Non	Cla001780	Calmodulin	0.969	0.97	0.969	1	1	1	1	Non	Non	Non
Non	Cla001781	Beta-galactosidase	0.969	0.97	0.969	1	1	1	1	Non	Non	Non
Non	Cla001782	Beta-galactosidase	0.969	0.97	0.969	1	1	1	1	Non	Non	Non
Non	Cla001783	BEL1-like	0.117	0.823	0.48	43.5	62.6	43.3	53.1	Non	Non	Non
Non	Cla001784	BTB/POZ	0.877	0.405	0.3	6.1	5.9	3.3	3.2	Non	Non	Non
Non	Cla001785	Histone-lysine	0.317	0.176	0.222	14.1	21	21.2	22.5	Non	Non	Non
Non	Cla001786	Ternary	0.788	0.435	0.7	1.9	1.5	0.6	1.3	Non	Non	Non
Non	Cla001787	TMV	0.545	0.303	0.273	1.4	0.6	0.1	0.1	Non	Non	Non
Non	Cla001788	Unknown	0.969	0.97	0.969	1	1	1	1	Non	Non	Non
Non	Cla001789	CASP-like	0.869	0.678	0.405	1.5	1.9	2.2	3.5	Non	Non	Non
Sig3.4	Cla001790	Oxygen-evolving	1.78e-15	0	0	1088.6	795.9	334.6	83.2	Non	Sig	Sig
Non	Cla001791	Cold	0.969	0.97	0.375	1	1	1	0.1	Non	Non	Non
Non	Cla001792	BTB/POZ	0.333	0.19	0.192	3.7	7.2	0.8	1	Non	Non	Non
Sig3.4	Cla001794	Receptor-like	0.312	0.00168	0.00197	35.2	28.9	12.3	69.8	Non	Sig	Sig
Non	Cla001795	mRNA	0.375	0.97	0.375	1	0.1	1	0.1	Non	Non	Non
Sig3	Cla001796	Unknown	0.637	0.011	0.089	3.4	5	13.3	10	Non	Sig	Non
Non	Cla001797	Unknown	0.626	0.889	0.95	1.5	2.6	1.2	1.7	Non	Non	Non
Sig3	Cla001799	Unknown	0.568	0.02	0.336	3.3	5.2	12	6.6	Non	Sig	Non
Non	Cla001801	Brain	0.984	0.653	0.964	6.5	6.8	4.7	6.7	Non	Non	Non
Non	Cla001802	Unknown	0.665	0.757	0.489	2.7	1.9	3.3	4.8	Non	Non	Non
Non	Cla001803	Ribonuclease	0.975	0.915	0.752	3.2	3.3	3.3	2.6	Non	Non	Non
Non	Cla001804	Unknown	0.976	0.771	0.535	0.6	0.6	0.3	0.1	Non	Non	Non
Non	Cla001805	Mitochondrial	0.784	0.664	0.647	1.8	1.4	1	1.1	Non	Non	Non
Sig3	Cla001806	Guanine	0.161	0.031	0.298	35.8	51.3	53.8	47.6	Non	Sig	Non
Non	Cla001807	B3	0.969	0.77	0.83	3.4	3.7	4	4.2	Non	Non	Non
Non	Cla001808	B3	0.491	0.65	0.686	1.7	0.7	0.9	1.1	Non	Non	Non
Non	Cla001809	B3	0.589	0.97	0.375	1	0.4	1	0.1	Non	Non	Non
Non	Cla001810	Molybdenum	0.631	0.575	0.284	19	23.3	21.5	27.6	Non	Non	Non
Non	Cla001811	Cyclin-H	0.762	0.636	0.604	2.5	3.4	3.5	4	Non	Non	Non
Non	Cla001812	Dof	0.842	0.38	0.52	0.3	0.5	1.4	1.1	Non	Non	Non
Non	Cla001813	Nucleoporin	0.487	0.914	0.864	3.6	2.1	3.7	4.3	Non	Non	Non
Non	Cla001814	Alpha-hydroxynitrile	0.995	0.377	0.549	7.4	7.8	4.1	5.6	Non	Non	Non
Non	Cla001815	Alpha-hydroxynitrile	0.086	0.33	0.543	2.9	9.2	0.9	4.8	Non	Non	Non
Non	Cla001816	Alpha-hydroxynitrile	0.819	0.522	0.78	0.9	1.3	0.2	0.6	Non	Non	Non
Sig2	Cla001817	Hydrolase	0.043	0.756	0.215	5.3	15	4.1	10.7	Sig	Non	Non
Non	Cla001818	Dof	0.915	0.715	0.601	1.4	1.3	0.8	0.7	Non	Non	Non
Non	Cla001819	Laccase-22	0.176	0.019	0.017	6.7	2.8	0.3	0.5	Non	Non	Non
Non	Cla001820	GEM-like	0.969	0.97	0.969	1	1	1	1	Non	Non	Non
Non	Cla001821	Disease	0.692	0.337	0.879	2.5	1.8	0.7	2.3	Non	Non	Non
Sig4	Cla001823	Misato	0.792	0.05	0.014	6.5	7.9	15	19.9	Non	Non	Sig
Non	Cla001825	Peroxidase	0.842	0.733	0.016	0.3	0.5	0.6	7	Non	Non	Non
Non	Cla001826	Calcium-dependent	0.826	0.607	0.567	5.5	6.6	3.7	4	Non	Non	Non
Non	Cla001827	Short-chain	0.872	0.831	0.414	7.9	7.7	6.7	5.3	Non	Non	Non
Sig3.4	Cla001828	Os03g0859900	0.83	5.17e-09	2.45e-11	45.8	50.6	3.5	1.3	Non	Sig	Sig
Non	Cla001829	Transmembrane	0.262	0.227	0.197	19	28	25.9	29.3	Non	Non	Non
Non	Cla001830	Unknown	0.657	0.59	0.657	0.4	0.1	1	0.1	Non	Non	Non
Non	Cla001831	Unknown	0.969	0.97	0.969	1	1	1	1	Non	Non	Non
Non	Cla001832	P-loop	0.676	0.364	0.726	1.6	1	0.3	1.1	Non	Non	Non
Non	Cla001833	Unknown	0.969	0.97	0.969	1	1	1	1	Non	Non	Non
Non	Cla001834	Unknown	0.969	0.97	0.969	1	1	1	1	Non	Non	Non
Non	Cla001836	Receptor	0.322	0.922	0.98	0.4	2	0.3	0.4	Non	Non	Non
Non	Cla001837	Unknown	0.969	0.97	0.969	1	1	1	1	Non	Non	Non
Non	Cla001838	Retrotransposon	0.969	0.97	0.969	1	1	1	1	Non	Non	Non
Non	Cla001839	Unknown	0.778	0.573	0.834	2.8	3.7	4.1	3.5	Non	Non	Non
Non	Cla001840	CD2	0.556	0.238	0.431	6.6	9.4	11.1	10.3	Non	Non	Non
Non	Cla001841	SKIP	0.915	0.513	0.361	3.5	4	5.2	6.7	Non	Non	Non
Sig3.4	Cla001842	Annexin	0.919	0.032	0.015	11.8	13	23.6	28.4	Non	Sig	Sig
Non	Cla001843	Unknown	0.685	0.213	0.22	3	4.3	6.6	7.2	Non	Non	Non
Non	Cla001844	PHP	0.88	0.855	0.671	6	6.9	5.1	4.9	Non	Non	Non
Non	Cla001845	Chloroplastic	0.834	0.225	0.769	5	6	9.2	6.3	Non	Non	Non
Non	Cla001846	Unknown	0.969	0.97	0.969	1	1	1	1	Non	Non	Non
Non	Cla001847	Peroxidase	0.969	0.97	0.969	1	1	1	1	Non	Non	Non
Non	Cla001848	Unknown	0.969	0.97	0.969	1	1	1	1	Non	Non	Non
Non	Cla001849	Peroxidase	0.847	0.439	0.638	0.9	0.7	0.1	0.4	Non	Non	Non
Non	Cla001850	Unknown	0.969	0.97	0.969	1	1	1	1	Non	Non	Non
Non	Cla001852	Pentatricopeptide	0.991	0.747	0.646	1.4	1.5	1.9	2.4	Non	Non	Non
Non	Cla001853	Unknown	0.856	0.361	0.443	1.1	0.9	2.8	2.7	Non	Non	Non
Non	Cla001854	Unknown	0.969	0.97	0.969	1	1	1	1	Non	Non	Non
Non	Cla001855	Unknown	0.447	0.483	0.375	1	0.2	0.2	0.1	Non	Non	Non
Non	Cla001856	Cyclin-dependent	0.626	0.634	0.525	1.6	0.9	0.8	0.7	Non	Non	Non
Non	Cla001858	Unknown	0.969	0.97	0.969	1	1	1	1	Non	Non	Non
Non	Cla001859	Unknown	0.969	0.97	0.969	1	1	1	1	Non	Non	Non
Non	Cla001860	Histone	0.347	0.983	0.463	15.3	11.2	14.4	20.7	Non	Non	Non
Non	Cla001861	Histone	0.674	0.62	0.312	13.1	11.7	10.1	19.8	Non	Non	Non
Non	Cla001862	Retrotransposon	0.969	0.97	0.969	1	1	1	1	Non	Non	Non
Non	Cla001863	Unknown	0.903	0.987	0.903	0.2	0.3	0.2	0.3	Non	Non	Non
Non	Cla001864	Histone	0.976	0.862	0.833	0.6	0.6	0.4	0.9	Non	Non	Non
Non	Cla001865	Unknown	0.969	0.97	0.969	1	1	1	1	Non	Non	Non
Non	Cla001866	Zinc	0.375	0.406	0.375	1	0.1	0.1	0.1	Non	Non	Non
Non	Cla001867	Arabidopsis	0.943	0.051	0.059	6.3	6.4	14.7	15.8	Non	Non	Non
Non	Cla001868	Unknown	0.969	0.97	0.969	1	1	1	1	Non	Non	Non
Non	Cla001869	Pescadillo	0.376	0.104	0.168	19	14.8	29	30	Non	Non	Non
Non	Cla001870	Vacuolar	0.988	0.561	0.489	9.3	9.9	11.4	13.2	Non	Non	Non
Sig2	Cla001871	Alpha/beta-hydrolase	0.038	0.624	0.248	27.8	48	30	39.1	Sig	Non	Non
Non	Cla001872	Alpha/beta-hydrolases-like	0.331	0.376	0.586	4.4	8.2	7.1	6.5	Non	Non	Non
Non	Cla001873	Auxin-induced	0.407	0.376	0.99	0.1	1	1	0.1	Non	Non	Non
Non	Cla001874	Structural	0.066	0.09	0.066	6.1	1.3	1.3	1.3	Non	Non	Non
Non	Cla001875	50S	0.909	0.129	0.111	6.4	7.2	12.5	14.2	Non	Non	Non
Non	Cla001876	Unknown	0.78	0.535	0.66	3	2.5	4.5	4.4	Non	Non	Non
Non	Cla001877	Respiratory	0.974	0.517	0.487	0.7	0.7	0.1	0.1	Non	Non	Non
Non	Cla001878	Unknown	0.866	0.965	0.615	1.4	1.2	1.4	2.5	Non	Non	Non
Non	Cla001879	NADH	0.746	0.563	0.319	0.7	1.2	1.5	2.6	Non	Non	Non
Sig3	Cla001880	Pre-mRNA	0.72	0.04	0.35	16	19.1	28.5	22.9	Non	Sig	Non
Non	Cla001881	Zinc	0.121	0.699	0.434	2.7	8.1	3.5	5.1	Non	Non	Non
Non	Cla001882	ATP-dependent	0.471	0.07	0.051	7	10.5	14.9	17.3	Non	Non	Non
Non	Cla001883	Kinesin-like	0.966	0.979	0.805	1.2	1.2	1.1	0.9	Non	Non	Non
Non	Cla001884	Contains	0.969	0.97	0.969	1	1	1	1	Non	Non	Non
Non	Cla001885	Polyphosphoinositide	0.973	0.985	0.855	6.5	7	6.1	6.2	Non	Non	Non
Non	Cla001886	Polyphosphoinositide	0.852	0.728	0.585	4	4.8	4.8	6	Non	Non	Non
Non	Cla001887	Ribosomal	0.947	0.841	0.591	0.5	0.6	0.3	0.1	Non	Non	Non
Non	Cla001888	Polyphosphoinositide	0.728	0.957	0.765	6.2	7.9	5.7	7.7	Non	Non	Non
Non	Cla001889	Pectinesterase	0.969	0.97	0.969	1	1	1	1	Non	Non	Non
Non	Cla001890	Threonyl-tRNA	0.802	0.941	0.748	18.1	17.6	17.6	21.2	Non	Non	Non
Non	Cla001891	Pescadillo	0.95	0.619	0.48	7.7	8.4	9.3	11.3	Non	Non	Non
Non	Cla001892	Serine/threonine-protein	0.63	0.553	0.366	4.1	5.9	5.7	7.5	Non	Non	Non
Non	Cla001893	50S	0.835	0.622	0.673	2.8	3.5	3.9	4.1	Non	Non	Non
Non	Cla001894	Cytochrome	0.501	0.129	0.446	4.8	7.5	10.3	2.9	Non	Non	Non
Sig3	Cla001895	Short-chain	0.51	0.032	0.999	19.2	24.8	33.4	20.3	Non	Sig	Non
Non	Cla001898	Triacylglycerol	0.946	0.059	0.238	1.4	1.6	6.5	4.4	Non	Non	Non
Non	Cla001899	Unknown	0.969	0.406	0.969	1	1	0.1	1	Non	Non	Non
Non	Cla001900	Auxin	0.251	0.1	0.158	39.9	53.6	53.3	56.4	Non	Non	Non
Non	Cla001901	AtV27-like	0.79	0.639	0.63	1	0.7	1.7	1.9	Non	Non	Non
Non	Cla001902	Mitotic	0.835	0.328	0.123	3.5	4.3	6.3	9.4	Non	Non	Non
Non	Cla001903	Proteasome	0.535	0.921	0.066	10.6	14.4	10.5	22	Non	Non	Non
Non	Cla001904	Survival	0.933	0.566	0.823	5.4	6	7.1	6.5	Non	Non	Non
Non	Cla001905	Nucleic	0.446	0.212	0.295	9.8	14.2	15.4	15.8	Non	Non	Non
Non	Cla001906	Short-chain	0.716	0.577	0.768	0.8	1.4	1.6	0.5	Non	Non	Non
Non	Cla001907	Cytochrome	0.527	0.476	0.778	0.6	1.6	1.6	1	Non	Non	Non
Non	Cla001908	Short-chain	0.969	0.97	0.969	1	1	1	1	Non	Non	Non
Non	Cla001909	Short-chain	0.392	0.167	0.069	68.6	83.4	50.4	52	Non	Non	Non
Non	Cla001910	Uncharacterized	0.456	0.531	0.127	8.1	12	10.3	16.3	Non	Non	Non
Non	Cla001912	Unknown	0.986	0.448	0.673	0.2	0.2	1	0.6	Non	Non	Non
Non	Cla001913	Short-chain	0.421	0.956	0.486	14	19.6	13	11.2	Non	Non	Non
Non	Cla001914	Short-chain	0.658	0.176	0.121	0.7	1.4	3.3	4.3	Non	Non	Non
Non	Cla001915	Short-chain	0.67	0.4	0.563	4.7	3.7	7.3	7	Non	Non	Non
Non	Cla001916	Cytosine-specific	0.99	0.378	0.314	6	6.3	3.1	3.2	Non	Non	Non
Non	Cla001917	Lysine	0.539	0.263	0.125	0.5	1.4	2.3	3.8	Non	Non	Non
Non	Cla001918	3-oxoacyl-reductase	0.246	0.096	0.276	24.9	35.6	36.3	18.9	Non	Non	Non
Non	Cla001919	AT	0.969	0.97	0.375	1	1	1	0.1	Non	Non	Non
Non	Cla001920	Unknown	0.969	0.97	0.375	1	1	1	0.1	Non	Non	Non
Non	Cla001921	Unknown	0.969	0.97	0.969	1	1	1	1	Non	Non	Non
Non	Cla001922	Unknown	0.969	0.97	0.969	1	1	1	1	Non	Non	Non
Non	Cla001923	Unknown	0.813	0.873	0.903	0.2	0.4	0.3	0.3	Non	Non	Non
Non	Cla001924	Unknown	0.969	0.97	0.969	1	1	1	1	Non	Non	Non
Non	Cla001925	ATP-dependent	0.859	0.632	0.538	10.8	12.3	12.5	14.6	Non	Non	Non
Non	Cla001926	Unknown	0.98	0.812	0.937	0.4	0.4	0.2	0.5	Non	Non	Non
Non	Cla001927	ATP-dependent	0.586	0.528	0.569	6.1	8.6	8.1	8.7	Non	Non	Non
Non	Cla001928	Unknown	0.969	0.97	0.969	1	1	1	1	Non	Non	Non
Non	Cla001929	Unknown	0.969	0.97	0.969	1	1	1	1	Non	Non	Non
Non	Cla001930	Major	0.975	0.525	0.761	17.3	18.1	20.2	20.2	Non	Non	Non
Non	Cla001931	MLP-like	0.309	0.184	0.777	11.4	17.7	17.8	13.5	Non	Non	Non
Non	Cla001932	Unknown	0.969	0.97	0.375	1	1	1	0.1	Non	Non	Non
Non	Cla001933	Unknown	0.969	0.97	0.969	1	1	1	1	Non	Non	Non
Non	Cla001934	Unknown	0.969	0.97	0.969	1	1	1	1	Non	Non	Non
Non	Cla001935	Unknown	0.969	0.97	0.969	1	1	1	1	Non	Non	Non
Non	Cla001936	Unknown	0.969	0.97	0.969	1	1	1	1	Non	Non	Non
Non	Cla001937	RNA-dependent	0.853	0.104	0.127	6.6	7.7	1.7	2.3	Non	Non	Non
Non	Cla001938	Hydroxyacylglutathione	0.488	0.071	0.403	5.2	8.1	12.3	8.7	Non	Non	Non
Non	Cla001939	Succinate	0.796	0.361	0.051	1.1	1.6	2.8	6.8	Non	Non	Non
Non	Cla001941	Unknown	0.806	0.674	0.834	2.8	3.6	3.7	3.5	Non	Non	Non
Non	Cla001942	Unknown	0.969	0.97	0.969	1	1	1	1	Non	Non	Non
Non	Cla001943	SMP-30/Gluconolaconase/LRE	0.534	0.394	0.231	1.2	2.5	2.8	4.1	Non	Non	Non
Non	Cla001944	Nicotinate-nucleotide	0.374	0.61	0.595	4.8	8.4	6.2	3.5	Non	Non	Non
Non	Cla001945	Nicotinate-nucleotide	0.382	0.541	0.624	5.9	9.8	7.8	4.6	Non	Non	Non
Non	Cla001946	Unknown	0.969	0.97	0.969	1	1	1	1	Non	Non	Non
Non	Cla001948	Unknown	0.969	0.97	0.969	1	1	1	1	Non	Non	Non
Non	Cla001949	Unknown	0.843	0.866	0.843	0.2	0.1	0.1	0.1	Non	Non	Non
Non	Cla001950	Unknown	0.765	0.445	0.158	0.1	0.3	0.8	2.4	Non	Non	Non
Sig3.4	Cla001951	U-box	0.067	0.0042	0.019	20.9	11.4	5.5	8.9	Non	Sig	Sig
Non	Cla001952	Unknown	0.978	0.902	0.895	0.5	0.5	0.6	0.4	Non	Non	Non
Non	Cla001953	Unknown	0.969	0.97	0.969	1	1	1	1	Non	Non	Non
Non	Cla001955	Unknown	0.969	0.97	0.969	1	1	1	1	Non	Non	Non
Non	Cla001956	Unknown	0.969	0.97	0.375	1	1	1	0.1	Non	Non	Non
Non	Cla001957	Unknown	0.969	0.97	0.969	1	1	1	1	Non	Non	Non
Non	Cla001958	Retrotransposon	0.969	0.97	0.969	1	1	1	1	Non	Non	Non
Non	Cla001959	Unknown	0.969	0.97	0.969	1	1	1	1	Non	Non	Non
Sig3.4	Cla001960	Fructose-1,6-bisphosphatase	0.092	9.48e-11	0	175.7	154.3	68.2	41.4	Non	Sig	Sig
Non	Cla001961	Trihelix	0.761	0.741	0.385	21.1	20.3	18	16.8	Non	Non	Non
Non	Cla001962	Unknown	0.765	0.739	0.117	0.1	0.3	0.3	2.9	Non	Non	Non
Non	Cla001963	Unknown	0.969	0.97	0.969	1	1	1	1	Non	Non	Non
Non	Cla001964	Trihelix	0.341	0.631	0.126	34.5	28.7	29	24.4	Non	Non	Non
Non	Cla001965	Unknown	0.969	0.97	0.375	1	1	1	0.1	Non	Non	Non
Non	Cla001966	Unknown	0.969	0.97	0.969	1	1	1	1	Non	Non	Non
Non	Cla001967	Unknown	0.772	0.887	0.983	0.3	0.6	0.4	0.3	Non	Non	Non
Non	Cla001968	RNA-binding	0.8	0.719	0.636	1.6	2.2	2.2	2.7	Non	Non	Non
Non	Cla001969	Unknown	0.407	0.991	0.867	0.1	1	0.1	0.2	Non	Non	Non
Non	Cla001970	Unknown	0.484	0.448	0.843	0.2	1	1	0.1	Non	Non	Non
Non	Cla001971	Unknown	0.969	0.97	0.969	1	1	1	1	Non	Non	Non
Non	Cla001972	Unknown	0.969	0.97	0.969	1	1	1	1	Non	Non	Non
Non	Cla001973	Unknown	0.969	0.97	0.969	1	1	1	1	Non	Non	Non
Non	Cla001974	Unknown	0.407	0.991	0.407	0.1	1	0.1	1	Non	Non	Non
Non	Cla001975	Harpin-induced	0.765	0.591	0.565	0.1	0.3	0.5	0.6	Non	Non	Non
Non	Cla001977	Unknown	0.969	0.97	0.969	1	1	1	1	Non	Non	Non
Non	Cla001978	Gag/pol	0.969	0.97	0.969	1	1	1	1	Non	Non	Non
Non	Cla001979	Unknown	0.484	0.987	0.986	0.2	1	0.2	0.2	Non	Non	Non
Non	Cla001980	Unknown	0.617	0.124	0.123	9.2	12.1	16.3	18	Non	Non	Non
Non	Cla001981	Amine	0.99	0.991	0.99	0.1	0.1	0.1	0.1	Non	Non	Non
Non	Cla001982	Cyclopropane	0.969	0.97	0.969	1	1	1	1	Non	Non	Non
Non	Cla001983	Unknown	0.969	0.97	0.969	1	1	1	1	Non	Non	Non
Non	Cla001984	Unknown	0.969	0.97	0.969	1	1	1	1	Non	Non	Non
Non	Cla001985	tRNA	0.985	0.621	0.891	1.2	1.3	2	1.5	Non	Non	Non
Non	Cla001986	tRNA	0.969	0.639	0.829	1	1	1.7	1.4	Non	Non	Non
Non	Cla001987	tRNA	0.969	0.445	0.925	1	1	2.3	1.2	Non	Non	Non
Non	Cla001988	Polygalacturonase	0.969	0.97	0.969	1	1	1	1	Non	Non	Non
Non	Cla001989	Unknown	0.969	0.97	0.375	1	1	1	0.1	Non	Non	Non
Non	Cla001990	General	0.523	0.195	0.215	1.8	3.4	5	5.3	Non	Non	Non
Non	Cla001991	Unknown	0.867	0.844	0.99	0.1	0.2	0.2	0.1	Non	Non	Non
Non	Cla001992	Unknown	0.969	0.97	0.969	1	1	1	1	Non	Non	Non
Non	Cla001993	Unknown	0.969	0.97	0.969	1	1	1	1	Non	Non	Non
Non	Cla001994	Phloem	0.969	0.97	0.852	1	1	1	0.8	Non	Non	Non
Non	Cla001995	Unknown	0.969	0.97	0.969	1	1	1	1	Non	Non	Non
Non	Cla001996	Unknown	0.969	0.97	0.969	1	1	1	1	Non	Non	Non
Non	Cla001997	Unknown	0.886	0.812	0.78	0.4	0.3	0.2	0.2	Non	Non	Non
Non	Cla001998	Unknown	0.969	0.97	0.969	1	1	1	1	Non	Non	Non
Non	Cla001999	Phloem	0.99	0.658	0.565	0.1	0.1	0.4	0.6	Non	Non	Non
Non	Cla002000	Unknown	0.772	0.614	0.709	0.3	0.6	0.8	0.7	Non	Non	Non
Non	Cla002001	Phloem	0.969	0.97	0.969	1	1	1	1	Non	Non	Non
Non	Cla002002	Unknown	0.969	0.97	0.969	1	1	1	1	Non	Non	Non
Non	Cla002003	Galactose-binding	0.443	0.602	0.548	6.4	4.2	4.4	9.2	Non	Non	Non
Non	Cla002004	Phloem	0.931	0.961	0.603	4.8	4.8	4.7	6.9	Non	Non	Non
Non	Cla002005	Unknown	0.969	0.97	0.375	1	1	1	0.1	Non	Non	Non
Non	Cla002006	Unknown	0.484	0.873	0.986	0.2	1	0.3	0.2	Non	Non	Non
Non	Cla002007	Unknown	0.375	0.97	0.969	1	0.1	1	1	Non	Non	Non
Non	Cla002008	Unknown	0.969	0.97	0.969	1	1	1	1	Non	Non	Non
Non	Cla002009	Unknown	0.969	0.97	0.969	1	1	1	1	Non	Non	Non
Non	Cla002011	Phloem	0.969	0.97	0.969	1	1	1	1	Non	Non	Non
Non	Cla002012	Unknown	0.908	0.799	0.084	0.8	0.7	1.1	5.2	Non	Non	Non
Non	Cla002013	Unknown	0.375	0.406	0.375	1	0.1	0.1	0.1	Non	Non	Non
Non	Cla002014	Unknown	0.99	0.376	0.867	0.1	0.1	1	0.2	Non	Non	Non
Sig4	Cla002015	Cysteine	0.539	0.14	0.031	5.3	7.9	10.8	15.8	Non	Non	Sig
Non	Cla002016	Unknown	0.969	0.97	0.969	1	1	1	1	Non	Non	Non
Non	Cla002017	Unknown	0.375	0.97	0.375	1	0.1	1	0.1	Non	Non	Non
Non	Cla002018	Unknown	0.969	0.97	0.969	1	1	1	1	Non	Non	Non
Non	Cla002019	Pentatricopeptide	0.903	0.81	0.916	2.2	2.6	2.6	2.1	Non	Non	Non
Non	Cla002020	Unknown	0.867	0.844	0.867	0.1	0.2	0.2	0.2	Non	Non	Non
Non	Cla002021	Unknown	0.969	0.97	0.969	1	1	1	1	Non	Non	Non
Non	Cla002022	Unknown	0.986	0.866	0.986	0.2	0.2	0.1	0.2	Non	Non	Non
Non	Cla002023	ATP-dependent	0.89	0.878	0.762	7.5	8.5	7.7	9.2	Non	Non	Non
Non	Cla002024	Unknown	0.867	0.658	0.765	0.1	0.2	0.4	0.3	Non	Non	Non
Non	Cla002025	Late-embryogenesis	0.951	0.768	0.312	59.3	63.4	53.2	74.7	Non	Non	Non
Non	Cla002026	Unknown	0.969	0.406	0.969	1	1	0.1	1	Non	Non	Non
Non	Cla002027	Unknown	0.969	0.97	0.969	1	1	1	1	Non	Non	Non
Non	Cla002028	Unknown	0.969	0.97	0.969	1	1	1	1	Non	Non	Non
Non	Cla002029	Unknown	0.969	0.97	0.969	1	1	1	1	Non	Non	Non
Non	Cla002030	Calcium	0.375	0.97	0.375	1	0.1	1	0.1	Non	Non	Non
Non	Cla002031	Unknown	0.969	0.97	0.969	1	1	1	1	Non	Non	Non
Non	Cla002032	Unknown	0.843	0.987	0.986	0.2	0.1	0.2	0.2	Non	Non	Non
Non	Cla002033	Importin	0.652	0.773	0.212	26.4	24.6	27.1	38.2	Non	Non	Non
Non	Cla002034	Transcription	0.675	0.973	0.76	0.8	1.5	0.8	1.3	Non	Non	Non
Non	Cla002035	Signal	0.866	0.439	0.648	4.5	5.3	6.8	6.3	Non	Non	Non
Non	Cla002036	Unknown	0.969	0.97	0.969	1	1	1	1	Non	Non	Non
Non	Cla002037	Unknown	0.969	0.97	0.969	1	1	1	1	Non	Non	Non
Non	Cla002038	Unknown	0.969	0.97	0.969	1	1	1	1	Non	Non	Non
Non	Cla002039	Ethylene	0.867	0.991	0.867	0.1	0.2	0.1	0.2	Non	Non	Non
Non	Cla002040	Late	0.947	0.841	0.895	0.5	0.6	0.3	0.4	Non	Non	Non
Non	Cla002041	Unknown	0.969	0.97	0.969	1	1	1	1	Non	Non	Non
Non	Cla002042	Xyloglucan	0.852	0.626	0.59	3.9	3.6	2.5	2.7	Non	Non	Non
Non	Cla002043	Unknown	0.969	0.97	0.969	1	1	1	1	Non	Non	Non
Non	Cla002044	Mitotic-spindle	0.871	0.994	0.617	1.7	1.5	1.6	2.9	Non	Non	Non
Non	Cla002045	Inner	0.967	0.916	0.679	1.1	1.1	1.2	1.9	Non	Non	Non
Non	Cla002046	Unknown	0.559	0.661	0.833	6.7	9.5	4.9	6.3	Non	Non	Non
Non	Cla002047	Unknown	0.78	0.685	0.887	0.4	0.2	0.1	0.3	Non	Non	Non
Non	Cla002048	Inner	0.972	0.799	0.675	0.8	0.8	1.1	1.5	Non	Non	Non
Non	Cla002049	Unknown	0.784	0.708	0.615	1.4	2	2	2.5	Non	Non	Non
Non	Cla002050	Unknown	0.978	0.841	0.591	0.5	0.5	0.3	0.1	Non	Non	Non
Non	Cla002051	Unknown	0.969	0.97	0.969	1	1	1	1	Non	Non	Non
Non	Cla002052	Unknown	0.375	0.97	0.969	1	0.1	1	1	Non	Non	Non
Non	Cla002053	DNA-directed	0.945	0.311	0.147	4.8	5.3	8.1	11	Non	Non	Non
Non	Cla002054	Protein	0.957	0.164	0.125	8.2	8.9	14.2	16.5	Non	Non	Non
Non	Cla002055	Unknown	0.867	0.844	0.99	0.1	0.2	0.2	0.1	Non	Non	Non
Non	Cla002056	Unknown	0.375	0.97	0.969	1	0.1	1	1	Non	Non	Non
Non	Cla002057	Unknown	0.983	0.887	0.983	0.3	0.3	0.4	0.3	Non	Non	Non
Non	Cla002058	Unknown	0.969	0.97	0.969	1	1	1	1	Non	Non	Non
Non	Cla002059	Unknown	0.969	0.97	0.375	1	1	1	0.1	Non	Non	Non
Non	Cla002060	Uncharacterized	0.846	0.702	0.777	2.8	2.5	3.6	3.7	Non	Non	Non
Non	Cla002061	Unknown	0.737	0.873	0.986	0.2	0.5	0.3	0.2	Non	Non	Non
Non	Cla002062	Unknown	0.969	0.97	0.969	1	1	1	1	Non	Non	Non
Non	Cla002063	Unknown	0.969	0.97	0.969	1	1	1	1	Non	Non	Non
Non	Cla002064	Unknown	0.969	0.97	0.969	1	1	1	1	Non	Non	Non
Non	Cla002065	Wall-associated	0.969	0.97	0.969	1	1	1	1	Non	Non	Non
Non	Cla002066	Unknown	0.969	0.97	0.969	1	1	1	1	Non	Non	Non
Non	Cla002067	Receptor-like	0.867	0.991	0.407	0.1	0.2	0.1	1	Non	Non	Non
Non	Cla002068	Unknown	0.99	0.991	0.99	0.1	0.1	0.1	0.1	Non	Non	Non
Non	Cla002069	Transmembrane	0.491	0.268	0.427	7.2	10.6	11.5	11.1	Non	Non	Non
Non	Cla002070	Unknown	0.969	0.97	0.969	1	1	1	1	Non	Non	Non
Non	Cla002071	MLO-like	0.969	0.97	0.969	1	1	1	1	Non	Non	Non
Non	Cla002072	Unknown	0.969	0.97	0.969	1	1	1	1	Non	Non	Non
Non	Cla002073	Unknown	0.969	0.97	0.969	1	1	1	1	Non	Non	Non
Non	Cla002074	Unknown	0.969	0.97	0.969	1	1	1	1	Non	Non	Non
Non	Cla002076	Unknown	0.969	0.97	0.969	1	1	1	1	Non	Non	Non
Non	Cla002077	Unknown	0.986	0.987	0.986	0.2	0.2	0.2	0.2	Non	Non	Non
Non	Cla002078	Unknown	0.99	0.376	0.99	0.1	0.1	1	0.1	Non	Non	Non
Non	Cla002079	Unknown	0.969	0.97	0.969	1	1	1	1	Non	Non	Non
Non	Cla002080	Zinc	0.669	0.517	0.905	0.7	0.3	0.1	0.6	Non	Non	Non
Non	Cla002081	Unknown	0.969	0.97	0.969	1	1	1	1	Non	Non	Non
Non	Cla002082	LOC495158	0.826	0.483	0.541	2	2.6	3.5	3.6	Non	Non	Non
Non	Cla002083	Unknown	0.969	0.97	0.969	1	1	1	1	Non	Non	Non
Non	Cla002084	WRKY	0.895	0.832	0.031	0.5	0.4	0.7	6.3	Non	Non	Non
Non	Cla002085	Unknown	0.99	0.991	0.99	0.1	0.1	0.1	0.1	Non	Non	Non
Non	Cla002086	Short-chain	0.614	0.157	0.053	10.8	14	4.8	3.8	Non	Non	Non
Non	Cla002087	Unknown	0.99	0.376	0.765	0.1	0.1	1	0.3	Non	Non	Non
Non	Cla002088	Unknown	0.867	0.376	0.99	0.1	0.2	1	0.1	Non	Non	Non
Non	Cla002089	Unknown	0.969	0.97	0.969	1	1	1	1	Non	Non	Non
Non	Cla002090	Unknown	0.867	0.991	0.99	0.1	0.2	0.1	0.1	Non	Non	Non
Non	Cla002091	Short-chain	0.638	0.544	0.335	4.5	3.4	6.2	8.3	Non	Non	Non
Non	Cla002092	Unknown	0.867	0.991	0.284	0.1	0.2	0.1	1.5	Non	Non	Non
Non	Cla002093	Retrotransposon	0.969	0.97	0.969	1	1	1	1	Non	Non	Non
Non	Cla002094	Unknown	0.969	0.97	0.969	1	1	1	1	Non	Non	Non
Non	Cla002095	Unknown	0.969	0.97	0.969	1	1	1	1	Non	Non	Non
Non	Cla002096	Unknown	0.407	0.991	0.407	0.1	1	0.1	1	Non	Non	Non
Non	Cla002097	Unknown	0.973	0.712	0.486	0.9	1	1.4	0.2	Non	Non	Non
Non	Cla002098	Yellow	0.265	0.076	0.053	22.2	31.9	34	39	Non	Non	Non
Non	Cla002099	Transcription	0.854	0.218	0.976	6.8	6.5	11.6	7.3	Non	Non	Non
Non	Cla002100	Unknown	0.969	0.97	0.969	1	1	1	1	Non	Non	Non
Non	Cla002101	Unknown	0.969	0.97	0.969	1	1	1	1	Non	Non	Non
Non	Cla002102	Unknown	0.969	0.97	0.969	1	1	1	1	Non	Non	Non
Sig3.4	Cla002103	Tubby-like	0.639	0.016	0.013	7.8	10.3	19.7	22.3	Non	Sig	Sig
Non	Cla002104	Unknown	0.983	0.984	0.872	0.3	0.3	0.3	0.2	Non	Non	Non
Non	Cla002105	Unknown	0.969	0.97	0.969	1	1	1	1	Non	Non	Non
Non	Cla002106	Ribosome	0.749	0.248	0.613	12.6	11.7	18.2	10.8	Non	Non	Non
Non	Cla002107	Unknown	0.969	0.97	0.969	1	1	1	1	Non	Non	Non
Non	Cla002108	Unknown	0.375	0.97	0.375	1	0.1	1	0.1	Non	Non	Non
Non	Cla002109	Unknown	0.407	0.376	0.99	0.1	1	1	0.1	Non	Non	Non
Non	Cla002110	Unknown	0.969	0.97	0.969	1	1	1	1	Non	Non	Non
Non	Cla002111	Unknown	0.969	0.97	0.969	1	1	1	1	Non	Non	Non
Non	Cla002112	Unknown	0.969	0.97	0.969	1	1	1	1	Non	Non	Non
Non	Cla002113	Unknown	0.969	0.97	0.969	1	1	1	1	Non	Non	Non
Non	Cla002114	Zinc	0.969	0.406	0.969	1	1	0.1	1	Non	Non	Non
Non	Cla002115	Niemann-pick	0.364	0.204	0.162	1	2.9	3.6	4.4	Non	Non	Non
Non	Cla002116	Niemann-Pick	0.411	0.137	0.161	5.7	9.3	11.4	12.1	Non	Non	Non
Non	Cla002117	Cholesterol	0.716	0.383	0.52	1.1	1.8	2.7	2.4	Non	Non	Non
Non	Cla002118	Pentatricopeptide	0.843	0.78	0.903	0.2	0.1	0.4	0.3	Non	Non	Non
Non	Cla002119	Unknown	0.407	0.991	0.99	0.1	1	0.1	0.1	Non	Non	Non
Non	Cla002120	U-box	0.308	0.688	0.839	4.4	8.4	5.4	5.3	Non	Non	Non
Non	Cla002121	Unknown	0.969	0.97	0.969	1	1	1	1	Non	Non	Non
Non	Cla002122	Unknown	0.969	0.97	0.969	1	1	1	1	Non	Non	Non
Non	Cla002123	Unknown	0.969	0.97	0.969	1	1	1	1	Non	Non	Non
Non	Cla002124	Unknown	0.872	0.764	0.983	0.3	0.2	0.1	0.3	Non	Non	Non
Non	Cla002125	Unknown	0.813	0.78	0.673	0.2	0.4	0.4	0.6	Non	Non	Non
[truncated: 21,443 more rows]
